# Supplementary material for: Incomplete Recovery of Zebrafish Retina Following Cryoinjury
Source: MDPI journal article supplement (doi:10.3390/cells11081373), 2022-04-18
Supplement: s1 [file s1]

Table S1 Details of 1° and 2° antibodies.

| 1° ab           |                    |         |          |                       |
|-----------------|--------------------|---------|----------|-----------------------|
| Antibody        | Species            | Isotype | Dilution | Product Code & Source |
| anti-PCNA       | rabbit, polyclonal | IgG     | 1:400    | ab2426, Abcam         |
| zpr-1           | mouse, monoclonal  | IgG     | 1:500    | AB_10013803, ZIRC     |
| zpr-3           | mouse, monoclonal  | IgG     | 1:100    | AB_10013805, ZIRC     |
| zns-2           | mouse, monoclonal  | IgG     | 1:400    | AB_10013793, ZIRC     |
| zrf-1           | mouse, monoclonal  | IgG     | 1:400    | AB_10013806, ZIRC     |
| 2° ab           |                    |         |          |                       |
| Antibody        | Species            | Isotype | Dilution | Product Code & Source |
| Alexa Fluor 488 | goat anti-rabbit   | IgG     | 1:500    | A11008, Invitrogen    |
| Alexa Fluor 488 | goat anti-mouse    | IgG     | 1:500    | A11017, Invitrogen    |
| Alexa Fluor 594 | goat anti-mouse    | IgG     | 1:500    | A11005, Invitrogen    |
| Alexa Fluor 594 | goat anti-rabbit   | IgG     | 1:500    | A11012, Invitrogen    |
