# Supplementary material for: Incomplete Recovery of Zebrafish Retina Following Cryoinjury
Source: MDPI journal article supplement (doi:10.3390/cells11081373), 2022-04-18
Supplement: s1 [file s1]

Table S2 Primer sequences and amplification temperatures for RT-PCR.

| Gene ID       | Direction | Sequence 5' – 3'     | Ta °C | Amplicon size (bp) |
|---------------|-----------|----------------------|-------|--------------------|
| <i>ascl1a</i> | Forward   | GCTCCTGGACTTCACCAACT | 58/60 | 230                |
|               | Reverse   | TGCGCTGGAAGGACTGGATT |       |                    |
| <i>lin28</i>  | Forward   | GACTCACCCGTGGATGTCTT | 60    | 207                |
|               | Reverse   | ATCTCCTTTTGACCGCCTCT |       |                    |
| <i>wnt4a</i>  | Forward   | CTGGAGAGCGTTCCTGTGTT | 60    | 251                |
|               | Reverse   | CGTTCCCTGATGTCCACGAA |       |                    |
| <i>mmp9</i>   | Forward   | GCCGTATCTCTGTTAGGGCA | 60    | 199                |
|               | Reverse   | GCTTCTGTCCCAGTGAGCTT |       |                    |
| <i>mmp2</i>   | Forward   | CCACCAGTCACACCAATGGA | 60    | 244                |
|               | Reverse   | CCCACATCTCATCACCAGCA |       |                    |
| <i>tgfb1</i>  | Forward   | ATCAGGCGGTTCTTCAACAC | 60    | 127                |
|               | Reverse   | TTGCGGCGATACCATTGCTT |       |                    |
| <i>cxcr5</i>  | Forward   | TTCCTGTGCAAGCTAGTGGG | 60    | 164                |
|               | Reverse   | CAGAGCAGTCCACAGGTGAG |       |                    |
| <i>gata3</i>  | Forward   | CTTGAAGCCTCGCACTGATG | 60    | 185                |
|               | Reverse   | ACAGCTCGATTCTCGTGTC  |       |                    |
| <i>stat3</i>  | Forward   | AGCAGTTGGAGACGCGGTAT | 58    | 138                |
|               | Reverse   | TGGCGTGAGACTCCTTGTTG |       |                    |
