# Supplementary material for: Incomplete Recovery of Zebrafish Retina Following Cryoinjury
Source: Cells. 2022 Apr 18;11(8):1373. doi: 10.3390/cells11081373 (PMC9030934; doi:10.3390/cells11081373)
Supplement: Supplementary file 1 [file cells-11-01373-s001.zip]

Archive with 8 entries (8 files):
- .DS_Store
- cells-1616709-Supplementary Material titles.pdf
- Figure S1.pdf
- Figure S2.pdf
- Table S1.pdf
- Table S2.pdf
- Table S3.csv
- Table S4 update.xlsx
