# Supplementary material for: Incomplete Recovery of Zebrafish Retina Following Cryoinjury
Source: Cells. 2022 Apr 18;11(8):1373. doi: 10.3390/cells11081373 (PMC9030934; doi:10.3390/cells11081373)
Supplement: Supplementary file 1 [file cells-11-01373-s001.zip › Table S3.csv]

Ensembl.Gene.ID	Associated.Gene.Name	ProbeID	AverageExpr	FC_X30.X0	FC_X3.X0	FC_X7.X0	FDR_X30.X0	FDR_X3.X0	FDR_X7.X0	Groups	Description	Chromosome.Name	Gene.Start..bp.	Gene.End..bp.	Strand	Transcript.count	Status..gene.	FC_X3.X0.scaled	FC_X30.X0.scaled	FC_X7.X0.scaled	clusterID	FDRgenomeSignif
ENSDARG00000000161	itsn2a	ENSDARG00000000161	518.4563138	-1.404300328	-1.631818742	-1.519129429	0.005354691	0.000539757	0.001540467	X30 - X0_X3 - X0_X7 - X0	intersectin 2a [Source:ZFIN;Acc:ZDB-GENE-041014-84]	20	25388671	25465996	-1	4	KNOWN	-0.996850338	1.003120179	-0.006269841	1	NA
ENSDARG00000000349	C21H11orf70	ENSDARG00000000349	4.470498835	2.567650512	11.19792242	4.116422405	0.000412548	2.52E-06	9.40E-05	X30 - X0_X3 - X0_X7 - X0	chromosome 11 open reading frame 70 [Source:HGNC Symbol;Acc:28188]	21	21943482	21947697	1	2	KNOWN_BY_PROJECTION	1.138229733	-0.737414619	-0.400815114	2	NA
ENSDARG00000000551	slc1a4	ENSDARG00000000551	679.9596107	1.491327694	2.335968432	2.079665926	0.015107627	0.000151705	0.000456722	X30 - X0_X3 - X0_X7 - X0	solute carrier family 1 (glutamate/neutral amino acid transporter), member 4 [Source:ZFIN;Acc:ZDB-GENE-030616-566]	13	24655104	24671375	-1	3	KNOWN	0.847412042	-1.102984773	0.255572732	3	NA
ENSDARG00000000656	psmb9a	ENSDARG00000000656	142.5361313	18.06454503	25.51117782	28.89512534	6.44E-08	2.56E-08	2.00E-08	X30 - X0_X3 - X0_X7 - X0	proteasome (prosome, macropain) subunit, beta type, 9a [Source:ZFIN;Acc:ZDB-GENE-990415-140]	19	7742916	7744909	1	1	KNOWN	0.244408862	-1.099546864	0.855138002	4	Yes
ENSDARG00000000767	spi1b	ENSDARG00000000767	988.8744856	4.357428251	32.06920773	18.62350618	2.65E-05	4.43E-08	1.36E-07	X30 - X0_X3 - X0_X7 - X0	spleen focus forming virus (SFFV) proviral integration oncogene spi1b [Source:ZFIN;Acc:ZDB-GENE-980526-164]	7	33979183	33993855	-1	5	KNOWN	0.989987446	-1.009720488	0.019733042	2	NA
ENSDARG00000000906	skap2	ENSDARG00000000906	176.5677266	3.221727633	14.15021343	9.921391734	0.001783748	2.08E-06	7.73E-06	X30 - X0_X3 - X0_X7 - X0	src kinase associated phosphoprotein 2 [Source:ZFIN;Acc:ZDB-GENE-030616-438]	16	23018783	23062136	1	2	KNOWN	0.916857763	-1.066317754	0.149459991	3	NA
ENSDARG00000000943	dzip1	ENSDARG00000000943	180.337917	2.564731939	3.421884595	4.574309532	1.86E-05	2.34E-06	4.65E-07	X30 - X0_X3 - X0_X7 - X0	DAZ interacting zinc finger protein 1 [Source:ZFIN;Acc:ZDB-GENE-040526-1]	6	7166378	7197114	1	4	KNOWN	-0.097604437	-0.947618892	1.045223329	4	NA
ENSDARG00000000972	pcl	ENSDARG00000000972	2874.195584	-1.170695959	-1.257932505	-1.273484876	0.036551922	0.005591556	0.004138194	X30 - X0_X3 - X0_X7 - X0	pyruvate carboxylase, like [Source:ZFIN;Acc:ZDB-GENE-090908-3]	21	26126820	26363007	1	3	KNOWN	-0.431281196	1.143270587	-0.711989392	1	NA
ENSDARG00000001057	bysl	ENSDARG00000001057	546.948681	1.209228903	2.167857288	1.55844512	0.023497006	2.20E-06	0.000127102	X30 - X0_X3 - X0_X7 - X0	bystin-like [Source:ZFIN;Acc:ZDB-GENE-040426-1287]	22	525997	533134	-1	1	KNOWN	1.077327231	-0.898558778	-0.178768453	2	NA
ENSDARG00000001220	mycbp2	ENSDARG00000001220	4200.30567	-1.192166063	-1.575866931	-1.38800537	0.041537755	0.000145862	0.001313992	X30 - X0_X3 - X0_X7 - X0	MYC binding protein 2 [Source:ZFIN;Acc:ZDB-GENE-030616-132]	9	17562093	17802548	-1	4	KNOWN	-0.992997933	1.006857986	-0.013860053	1	NA
ENSDARG00000001303	psmb8	ENSDARG00000001303	253.831286	14.56761522	29.24159504	26.90581553	5.90E-06	7.75E-07	9.47E-07	X30 - X0_X3 - X0_X7 - X0	proteasome (prosome, macropain) subunit, beta type, 8 [Source:ZFIN;Acc:ZDB-GENE-990415-141]	19	7728374	7767084	-1	4	KNOWN	0.719102351	-1.141963379	0.422861028	3	NA
ENSDARG00000001313	g2e3	ENSDARG00000001313	113.9959939	9.657699595	37.25320385	32.75862683	5.04E-06	5.84E-08	7.64E-08	X30 - X0_X3 - X0_X7 - X0	G2/M-phase specific E3 ubiquitin ligase [Source:ZFIN;Acc:ZDB-GENE-030616-400]	17	28857835	28870857	-1	2	KNOWN	0.722440185	-1.141322736	0.418882551	3	NA
ENSDARG00000001452	adam8a	ENSDARG00000001452	674.1002531	3.467045639	120.5212076	44.29264934	0.008644897	1.21E-07	9.00E-07	X30 - X0_X3 - X0_X7 - X0	a disintegrin and metalloproteinase domain 8a [Source:ZFIN;Acc:ZDB-GENE-030616-622]	13	24895371	24903526	1	2	KNOWN	1.084407782	-0.885780406	-0.198627375	2	NA
ENSDARG00000001470	mhc1zea	ENSDARG00000001470	322.8922383	1.538718218	4.878417306	3.103889108	0.002023252	1.53E-07	1.75E-06	X30 - X0_X3 - X0_X7 - X0	major histocompatibility complex class I ZEA [Source:ZFIN;Acc:ZDB-GENE-070705-176]	1	47613228	47619236	-1	2	KNOWN	1.020227843	-0.978463536	-0.041764306	2	NA
ENSDARG00000001558	kifc1	ENSDARG00000001558	283.4970793	7.419812613	29.85353206	21.62717452	5.46E-08	2.09E-09	3.53E-09	X30 - X0_X3 - X0_X7 - X0	kinesin family member C1 [Source:ZFIN;Acc:ZDB-GENE-000208-21]	19	7613506	7623139	1	1	KNOWN	0.900525013	-1.076194632	0.175669619	3	Yes
ENSDARG00000001656	psmb10	ENSDARG00000001656	138.9805124	17.53276915	30.96546978	35.20438126	3.73E-06	6.33E-07	4.16E-07	X30 - X0_X3 - X0_X7 - X0	proteasome (prosome, macropain) subunit, beta type, 10 [Source:ZFIN;Acc:ZDB-GENE-001208-2]	19	7734315	7767121	-1	2	KNOWN	0.332176966	-1.123816966	0.79164	4	Yes
ENSDARG00000001767	slc29a2	ENSDARG00000001767	115.6355519	12.61474623	38.90277503	29.69637519	6.68E-06	1.73E-07	3.46E-07	X30 - X0_X3 - X0_X7 - X0	solute carrier family 29 (nucleoside transporters), member 2 [Source:ZFIN;Acc:ZDB-GENE-050220-15]	21	26672079	26807688	-1	4	KNOWN	0.886972624	-1.083767245	0.196794621	3	NA
ENSDARG00000001782	prkacba	ENSDARG00000001782	60.90633165	2.463063862	6.705689397	4.71944116	0.027371169	0.00014071	0.000782652	X30 - X0_X3 - X0_X7 - X0	protein kinase, cAMP-dependent, catalytic, beta a [Source:ZFIN;Acc:ZDB-GENE-040426-1351]	11	8275738	8296952	1	1	KNOWN	0.97811594	-1.020534128	0.042418188	2	NA
ENSDARG00000001832	si:ch1073-403i13.1	ENSDARG00000001832	86.02187277	3.310272816	4.272570564	6.042117568	0.009761178	0.00421851	0.000600562	X30 - X0_X3 - X0_X7 - X0	si:ch1073-403i13.1 [Source:ZFIN;Acc:ZDB-GENE-100921-25]	8	37574076	37576393	-1	1	KNOWN	-0.194191551	-0.888661411	1.082852962	5	NA
ENSDARG00000001835	nalcn	ENSDARG00000001835	1196.552107	-1.221230982	-1.565789079	-1.505331678	0.036699086	0.000370491	0.000655353	X30 - X0_X3 - X0_X7 - X0	sodium leak channel, non-selective [Source:ZFIN;Acc:ZDB-GENE-050410-12]	9	32621978	32780414	-1	5	KNOWN	-0.733809374	1.139007563	-0.405198189	1	NA
ENSDARG00000001880	stx3a	ENSDARG00000001880	1098.491499	-1.216281616	-1.626172429	-1.684425606	0.028927189	0.000115467	6.74E-05	X30 - X0_X3 - X0_X7 - X0	syntaxin 3A [Source:ZFIN;Acc:ZDB-GENE-040426-1489]	14	22700396	22747613	1	1	KNOWN	-0.459414117	1.147151336	-0.687737219	1	NA
ENSDARG00000001889	TUBA1A (1 of 2)	ENSDARG00000001889	6202.793263	2.556047474	6.673182684	5.498788563	0.000136925	7.89E-07	1.76E-06	X30 - X0_X3 - X0_X7 - X0	tubulin, alpha 1a [Source:HGNC Symbol;Acc:20766]	23	35760274	35762942	1	1	KNOWN_BY_PROJECTION	0.831641812	-1.109563598	0.277921785	3	NA
ENSDARG00000001891	syt14b	ENSDARG00000001891	203.3328255	-1.332837553	-2.232756974	-1.637060713	0.049207028	0.000213005	0.004730638	X30 - X0_X3 - X0_X7 - X0	synaptotagmin XIVb [Source:ZFIN;Acc:ZDB-GENE-041014-36]	20	9419786	9456244	-1	2	KNOWN	-1.089084821	0.876838497	0.212246324	6	NA
ENSDARG00000001909	CR388015.1	ENSDARG00000001909	1973.275344	1.427602723	1.432013644	1.38837144	0.02939184	0.023105396	0.035782821	X30 - X0_X3 - X0_X7 - X0	Uncharacterized protein [Source:UniProtKB/TrEMBL;Acc:E7FC92]	24	21027155	21049407	-1	1	KNOWN	0.666711178	0.483113733	-1.149824911	7	NA
ENSDARG00000001929	pink1	ENSDARG00000001929	2642.450674	-1.367193315	-2.438320044	-2.103002823	0.024162725	3.41E-05	0.000129707	X30 - X0_X3 - X0_X7 - X0	PTEN induced putative kinase 1 [Source:ZFIN;Acc:ZDB-GENE-041212-53]	23	37565077	37578386	1	1	KNOWN	-0.855657499	1.099310457	-0.243652958	1	NA
ENSDARG00000001971	cthrc1b	ENSDARG00000001971	37.43224484	2.231131995	3.779170973	3.239055088	0.006842872	0.00014329	0.000402308	X30 - X0_X3 - X0_X7 - X0	collagen triple helix repeat containing 1b [Source:ZFIN;Acc:ZDB-GENE-050420-46]	16	50665425	50693981	-1	1	KNOWN	0.885886611	-1.084350886	0.198464275	3	NA
ENSDARG00000002002	LMCD1	ENSDARG00000002002	157.2581642	2.065150558	6.218581647	5.847379235	0.003491918	2.76E-06	3.96E-06	X30 - X0_X3 - X0_X7 - X0	LIM and cysteine-rich domains 1 [Source:HGNC Symbol;Acc:6633]	22	42142822	42153935	1	2	KNOWN_BY_PROJECTION	0.656219319	-1.150929296	0.494709977	3	NA
ENSDARG00000002046	btr29	ENSDARG00000002046	15.21926174	5.42710966	15.67335716	15.85312295	0.004116	3.94E-05	3.86E-05	X30 - X0_X3 - X0_X7 - X0	bloodthirsty-related gene family, member 29 [Source:ZFIN;Acc:ZDB-GENE-090512-2]	19	1504344	1511430	1	1	KNOWN	0.562224602	-1.154569583	0.592344981	4	NA
ENSDARG00000002165	psme1	ENSDARG00000002165	848.0962201	4.18571079	13.86602477	9.907540543	6.86E-06	8.62E-08	2.17E-07	X30 - X0_X3 - X0_X7 - X0	proteasome activator subunit 1 [Source:ZFIN;Acc:ZDB-GENE-991110-17]	24	12849936	12858615	1	2	KNOWN	0.934128945	-1.05490147	0.120772525	2	NA
ENSDARG00000002167	cacnb1	ENSDARG00000002167	352.7480393	1.450819835	2.41608076	2.68313543	0.031052219	0.000150057	7.83E-05	X30 - X0_X3 - X0_X7 - X0	calcium channel, voltage-dependent, beta 1 subunit [Source:ZFIN;Acc:ZDB-GENE-040718-399]	3	15773660	15847664	-1	6	KNOWN	0.359001138	-1.129941854	0.770940717	4	NA
ENSDARG00000002172	aplnra	ENSDARG00000002172	39.61100361	3.828562473	2.217601669	12.06876993	0.000943681	0.030018558	2.90E-06	X30 - X0_X3 - X0_X7 - X0	apelin receptor a [Source:ZFIN;Acc:ZDB-GENE-060929-512]	8	42369698	42370786	-1	1	KNOWN	-0.72303308	-0.418174023	1.141207103	5	NA
ENSDARG00000002215	rtca	ENSDARG00000002215	1136.178633	1.389648101	3.330239934	2.547475541	0.002387568	2.45E-07	1.55E-06	X30 - X0_X3 - X0_X7 - X0	RNA 3'-terminal phosphate cyclase [Source:ZFIN;Acc:ZDB-GENE-030131-9687]	22	16497252	16506149	-1	2	KNOWN	0.929805043	-1.057858622	0.128053579	3	NA
ENSDARG00000002231	PPAP2C (1 of 2)	ENSDARG00000002231	41.12414354	2.860334524	9.090519808	8.02746653	0.016688043	4.12E-05	6.92E-05	X30 - X0_X3 - X0_X7 - X0	phosphatidic acid phosphatase type 2C [Source:HGNC Symbol;Acc:9230]	2	52861686	52935538	1	1	KNOWN_BY_PROJECTION	0.729444895	-1.139920879	0.410475984	3	NA
ENSDARG00000002235	mmp14a	ENSDARG00000002235	376.9992536	5.490280489	11.80225632	20.53191811	0.000283221	1.28E-05	2.91E-06	X30 - X0_X3 - X0_X7 - X0	matrix metalloproteinase 14a (membrane-inserted) [Source:ZFIN;Acc:ZDB-GENE-030901-1]	7	25291382	25316761	-1	1	KNOWN	-0.106696828	-0.942373354	1.049070183	5	NA
ENSDARG00000002249	tbxas1	ENSDARG00000002249	712.896368	-1.251659083	-1.776774585	-1.3581707	0.020644713	5.44E-05	0.003518291	X30 - X0_X3 - X0_X7 - X0	thromboxane A synthase 1 (platelet, cytochrome P450, family 5, subfamily A) [Source:ZFIN;Acc:ZDB-GENE-030131-8805]	18	12104314	12321906	1	3	KNOWN	-1.133250188	0.758479227	0.374770961	6	NA
ENSDARG00000002304	gins2	ENSDARG00000002304	69.89475549	26.76412029	171.9223784	79.90067632	2.45E-05	8.36E-08	5.72E-07	X30 - X0_X3 - X0_X7 - X0	GINS complex subunit 2 [Source:ZFIN;Acc:ZDB-GENE-050419-19]	18	30425308	30443767	-1	1	KNOWN	1.076494843	-0.900005821	-0.176489022	2	NA
ENSDARG00000002336	dlc	ENSDARG00000002336	386.3671985	3.283089758	5.535585764	6.957071035	0.000445289	2.79E-05	1.08E-05	X30 - X0_X3 - X0_X7 - X0	deltaC [Source:ZFIN;Acc:ZDB-GENE-000125-4]	15	19425090	19429944	-1	2	KNOWN	0.149522482	-1.066341934	0.916819452	4	NA
ENSDARG00000002403	nusap1	ENSDARG00000002403	353.6098591	10.83396993	38.90580613	27.9899685	2.33E-07	1.02E-08	2.00E-08	X30 - X0_X3 - X0_X7 - X0	nucleolar and spindle associated protein 1 [Source:ZFIN;Acc:ZDB-GENE-030827-5]	13	33475323	33480269	-1	1	KNOWN	0.918369976	-1.065359419	0.146989443	3	Yes
ENSDARG00000002445	prdm1a	ENSDARG00000002445	818.5424182	5.721205583	6.342428597	16.79407683	1.21E-06	7.57E-07	4.32E-08	X30 - X0_X3 - X0_X7 - X0	PR domain containing 1a, with ZNF domain [Source:ZFIN;Acc:ZDB-GENE-030131-2193]	16	8650398	8662788	-1	1	KNOWN	-0.526703561	-0.626556934	1.153260494	5	Yes
ENSDARG00000002479	ercc6l	ENSDARG00000002479	153.8542848	6.173094936	44.6532027	24.80276963	3.56E-06	7.18E-09	2.32E-08	X30 - X0_X3 - X0_X7 - X0	excision repair cross-complementing rodent repair deficiency, complementation group 6-like [Source:ZFIN;Acc:ZDB-GENE-060531-56]	5	25582520	25595454	1	1	KNOWN	1.01040533	-0.989259276	-0.021146054	2	Yes
ENSDARG00000002576	cabp5a	ENSDARG00000002576	31535.56288	-1.35326225	-2.552367899	-2.789345381	0.034662725	2.64E-05	1.56E-05	X30 - X0_X3 - X0_X7 - X0	calcium binding protein 5a [Source:ZFIN;Acc:ZDB-GENE-040426-1655]	12	4528622	4542272	1	2	KNOWN	-0.416567331	1.140943166	-0.724375835	1	NA
ENSDARG00000002600	pcsk1	ENSDARG00000002600	1761.867974	-1.296241719	-2.182709393	-2.177773333	0.026850476	2.51E-05	2.63E-05	X30 - X0_X3 - X0_X7 - X0	proprotein convertase subtilisin/kexin type 1 [Source:ZFIN;Acc:ZDB-GENE-071009-1]	21	10108839	10146352	1	2	KNOWN	-0.582179158	1.154687038	-0.57250788	1	NA
ENSDARG00000002613	rpa3	ENSDARG00000002613	254.3686487	1.53580961	4.240671877	2.509240146	0.000906945	1.22E-07	3.27E-06	X30 - X0_X3 - X0_X7 - X0	replication protein A3 [Source:ZFIN;Acc:ZDB-GENE-040426-977]	19	25950690	25952850	1	1	KNOWN	1.079375759	-0.894949724	-0.184426036	2	NA
ENSDARG00000002635	FAM184A (2 of 2)	ENSDARG00000002635	1945.182599	-1.249099281	-1.944478063	-1.671329209	0.031691254	3.20E-05	0.000210519	X30 - X0_X3 - X0_X7 - X0	family with sequence similarity 184, member A [Source:HGNC Symbol;Acc:20991]	17	15150671	15223943	-1	2	KNOWN_BY_PROJECTION	-0.921504978	1.063348068	-0.141843089	1	NA
ENSDARG00000002659	mapre1b	ENSDARG00000002659	3831.576359	1.288315148	2.330606459	1.882934407	0.046351538	3.23E-05	0.000275011	X30 - X0_X3 - X0_X7 - X0	microtubule-associated protein, RP/EB family, member 1b [Source:ZFIN;Acc:ZDB-GENE-040426-2256]	23	9901568	9914536	-1	4	KNOWN	0.949863576	-1.043543598	0.093680021	2	NA
ENSDARG00000002732	spon2b	ENSDARG00000002732	6.929771169	3.520575503	6.289127469	6.932189828	0.044428584	0.004660238	0.003893591	X30 - X0_X3 - X0_X7 - X0	spondin 2b, extracellular matrix protein [Source:ZFIN;Acc:ZDB-GENE-990415-161]	14	15209301	15214832	1	3	KNOWN	0.390829372	-1.136392529	0.745563157	4	NA
ENSDARG00000002795	meis3	ENSDARG00000002795	94.00429974	1.578320042	1.527544639	2.636836944	0.024347998	0.036073467	0.000221051	X30 - X0_X3 - X0_X7 - X0	myeloid ecotropic viral integration site 3 [Source:ZFIN;Acc:ZDB-GENE-010406-2]	15	6727919	6753819	-1	1	KNOWN	-0.617411274	-0.536340214	1.153751487	5	NA
ENSDARG00000002826	cep57l1	ENSDARG00000002826	95.32028812	1.235012369	2.055351557	1.811426736	0.037258435	1.19E-05	5.26E-05	X30 - X0_X3 - X0_X7 - X0	centrosomal protein 57-like 1 [Source:ZFIN;Acc:ZDB-GENE-040808-27]	20	32180443	32187901	-1	3	KNOWN	0.842147643	-1.105245226	0.263097582	3	NA
ENSDARG00000002952	smo	ENSDARG00000002952	331.7495319	1.818028448	3.674203825	3.32114082	0.000562633	1.75E-06	3.23E-06	X30 - X0_X3 - X0_X7 - X0	smoothened homolog (Drosophila) [Source:ZFIN;Acc:ZDB-GENE-980526-89]	4	14036631	14045329	1	1	KNOWN	0.747111625	-1.136030838	0.388919213	3	NA
ENSDARG00000002986	gda	ENSDARG00000002986	1085.257847	3.493089761	201.5400816	97.06018243	0.008878147	7.21E-08	2.23E-07	X30 - X0_X3 - X0_X7 - X0	guanine deaminase [Source:ZFIN;Acc:ZDB-GENE-050522-434]	5	27352918	27367628	-1	1	KNOWN	1.017852425	-0.981136262	-0.036716163	2	NA
ENSDARG00000003016	eef2b	ENSDARG00000003016	34868.81842	1.533875079	3.338956312	2.537550392	0.003274484	2.54E-06	1.71E-05	X30 - X0_X3 - X0_X7 - X0	eukaryotic translation elongation factor 2b [Source:ZFIN;Acc:ZDB-GENE-030131-5128]	2	56950887	56976839	1	1	KNOWN	0.960639874	-1.035187736	0.074547862	2	NA
ENSDARG00000003046	sorbs2a	ENSDARG00000003046	407.296866	-1.249574071	-2.169862728	-1.716098977	0.024783349	8.79E-06	0.000107728	X30 - X0_X3 - X0_X7 - X0	sorbin and SH3 domain containing 2a [Source:ZFIN;Acc:ZDB-GENE-070308-2]	1	16489551	16545516	-1	2	KNOWN	-0.995345947	1.004589964	-0.009244017	1	NA
ENSDARG00000003061	cd276	ENSDARG00000003061	362.8995555	2.08126451	14.62998867	8.106308597	0.006778129	3.75E-07	2.83E-06	X30 - X0_X3 - X0_X7 - X0	CD276 molecule [Source:ZFIN;Acc:ZDB-GENE-070112-452]	18	49297702	49378271	-1	3	KNOWN	1.012978792	-0.9864951	-0.026483692	2	NA
ENSDARG00000003200	foxm1	ENSDARG00000003200	127.4050835	19.3193787	123.8603257	71.36423703	4.60E-06	2.32E-08	7.28E-08	X30 - X0_X3 - X0_X7 - X0	forkhead box M1 [Source:ZFIN;Acc:ZDB-GENE-040426-1275]	4	5681215	5704766	-1	1	KNOWN	1.001435658	-0.998558132	-0.002877526	2	NA
ENSDARG00000003216	anxa2a	ENSDARG00000003216	2455.495043	7.921925378	40.33456492	25.53810584	1.70E-05	2.23E-07	6.41E-07	X30 - X0_X3 - X0_X7 - X0	annexin A2a [Source:ZFIN;Acc:ZDB-GENE-030131-4282]	25	35059903	35074189	1	1	KNOWN	0.969779382	-1.0277027	0.057923319	2	NA
ENSDARG00000003244	gbp3	ENSDARG00000003244	246.9046995	1.645938006	2.267955302	2.461082572	0.006136397	0.000221255	0.000114477	X30 - X0_X3 - X0_X7 - X0	guanylate binding protein 3 [Source:ZFIN;Acc:ZDB-GENE-070912-176]	2	43955869	43980375	1	2	KNOWN	0.335624242	-1.124638791	0.789014549	4	NA
ENSDARG00000003320	fam91a1	ENSDARG00000003320	1810.585053	-1.166884145	-1.379328059	-1.455640817	0.036022299	0.000540091	0.000186015	X30 - X0_X3 - X0_X7 - X0	family with sequence similarity 91, member A1 [Source:ZFIN;Acc:ZDB-GENE-040426-1187]	19	34468859	34513184	1	1	KNOWN	-0.303259866	1.116526347	-0.813266482	1	NA
ENSDARG00000003375	gng12a	ENSDARG00000003375	439.5519764	1.48382122	5.133517748	2.931182447	0.018368455	9.50E-07	2.30E-05	X30 - X0_X3 - X0_X7 - X0	guanine nucleotide binding protein (G protein), gamma 12a [Source:ZFIN;Acc:ZDB-GENE-040426-2555]	2	10078443	10130118	-1	3	KNOWN	1.061410171	-0.92447702	-0.136933152	2	NA
ENSDARG00000003495	madd	ENSDARG00000003495	7909.731055	-1.176094181	-1.814680159	-1.506428558	0.047613873	1.72E-05	0.000247291	X30 - X0_X3 - X0_X7 - X0	MAP-kinase activating death domain [Source:ZFIN;Acc:ZDB-GENE-030131-8076]	7	35660425	35724091	-1	1	KNOWN	-0.988276138	1.011325372	-0.023049234	1	NA
ENSDARG00000003526	psma5	ENSDARG00000003526	1875.795836	1.250563082	2.682201141	1.722366953	0.016403191	7.81E-07	5.78E-05	X30 - X0_X3 - X0_X7 - X0	proteasome (prosome, macropain) subunit, alpha type,5 [Source:ZFIN;Acc:ZDB-GENE-040625-96]	11	37183786	37191782	-1	3	KNOWN	1.092668505	-0.869686466	-0.222982039	2	NA
ENSDARG00000003533	col8a1b	ENSDARG00000003533	255.1606647	5.126831322	9.950973342	17.45121515	0.000162232	7.68E-06	1.28E-06	X30 - X0_X3 - X0_X7 - X0	collagen, type VIII, alpha 1b [Source:ZFIN;Acc:ZDB-GENE-060503-140]	22	29926706	29930018	1	1	KNOWN	-0.143634775	-0.920415846	1.06405062	5	NA
ENSDARG00000003599	rpl3	ENSDARG00000003599	24177.72369	1.449213246	2.636119114	2.173193902	0.001759949	1.97E-06	1.03E-05	X30 - X0_X3 - X0_X7 - X0	ribosomal protein L3 [Source:ZFIN;Acc:ZDB-GENE-030131-1291]	3	30018332	30022483	-1	3	KNOWN	0.919302162	-1.064764832	0.14546267	3	NA
ENSDARG00000003757	cnpy1	ENSDARG00000003757	158.1999708	1.346116563	3.822645117	2.503797823	0.038513485	1.37E-06	2.68E-05	X30 - X0_X3 - X0_X7 - X0	canopy1 [Source:ZFIN;Acc:ZDB-GENE-060315-3]	2	29701087	29710868	-1	2	KNOWN	1.020972072	-0.977617731	-0.043354341	2	NA
ENSDARG00000003902	ctsl.1	ENSDARG00000003902	12.50751622	3.607342564	33.99899684	12.42372548	0.005238119	3.61E-06	9.64E-05	X30 - X0_X3 - X0_X7 - X0	cathepsin L.1 [Source:ZFIN;Acc:ZDB-GENE-040718-61]	17	27315894	27320142	1	1	KNOWN	1.107860429	-0.8358592	-0.272001229	2	NA
ENSDARG00000003931	cndp2	ENSDARG00000003931	2692.512944	1.507684708	9.607601474	4.568756709	0.02468807	2.60E-07	4.88E-06	X30 - X0_X3 - X0_X7 - X0	CNDP dipeptidase 2 (metallopeptidase M20 family) [Source:ZFIN;Acc:ZDB-GENE-030131-5499]	19	21283357	21305396	1	2	KNOWN	1.070802804	-0.909615266	-0.161187538	2	NA
ENSDARG00000004034	arhgdig	ENSDARG00000004034	1426.978434	2.788127234	9.852675827	7.359604242	0.000362301	1.08E-06	2.94E-06	X30 - X0_X3 - X0_X7 - X0	Rho GDP dissociation inhibitor (GDI) gamma [Source:ZFIN;Acc:ZDB-GENE-040426-1493]	3	27864729	27920351	1	2	KNOWN	0.88919644	-1.082561595	0.193365155	3	NA
ENSDARG00000004049	marcksa	ENSDARG00000004049	307.1747363	5.386847206	12.972449	12.89418427	1.75E-06	6.97E-08	7.21E-08	X30 - X0_X3 - X0_X7 - X0	myristoylated alanine rich protein kinase C substrate a [Source:ZFIN;Acc:ZDB-GENE-050522-145]	20	3351704	3358581	-1	2	KNOWN	0.586308205	-1.154653967	0.568345762	4	Yes
ENSDARG00000004059	galk2	ENSDARG00000004059	32.86946179	1.780147748	10.17063725	4.449642544	0.026587621	3.25E-07	2.01E-05	X30 - X0_X3 - X0_X7 - X0	galactokinase 2 [Source:ZFIN;Acc:ZDB-GENE-041114-143]	25	33369435	33378850	1	2	KNOWN	1.09729996	-0.860017284	-0.237282676	2	NA
ENSDARG00000004078	acsl4a	ENSDARG00000004078	1764.26016	1.526563489	1.556716112	1.987552412	0.000752776	0.000542349	2.45E-05	X30 - X0_X3 - X0_X7 - X0	acyl-CoA synthetase long-chain family member 4a [Source:ZFIN;Acc:ZDB-GENE-040426-1565]	14	29459069	29479568	1	1	KNOWN	-0.517902333	-0.634823346	1.15272568	5	NA
ENSDARG00000004094	acsbg2	ENSDARG00000004094	2172.800527	1.457498851	1.735075238	1.833357411	0.016087793	0.001518066	0.000848265	X30 - X0_X3 - X0_X7 - X0	acyl-CoA synthetase bubblegum family member 2 [Source:ZFIN;Acc:ZDB-GENE-030131-7099]	8	20695816	20730172	1	3	KNOWN	0.306601636	-1.117404846	0.810803211	4	NA
ENSDARG00000004169	stmn1a	ENSDARG00000004169	533.5172602	5.855489154	17.31293432	16.34773577	3.09E-06	7.95E-08	9.02E-08	X30 - X0_X3 - X0_X7 - X0	stathmin 1a [Source:ZFIN;Acc:ZDB-GENE-031006-14]	19	16640049	16642794	-1	3	KNOWN	0.651626826	-1.15136587	0.499739044	3	Yes
ENSDARG00000004176	ulk4	ENSDARG00000004176	61.29628711	1.577857337	3.319418085	2.593746452	0.031529502	4.82E-05	0.000316274	X30 - X0_X3 - X0_X7 - X0	unc-51-like kinase 4 (C. elegans) [Source:ZFIN;Acc:ZDB-GENE-100922-243]	16	7158139	7435459	1	3	KNOWN	0.940111539	-1.050695693	0.110584153	2	NA
ENSDARG00000004232	dlb	ENSDARG00000004232	129.5923957	8.377457971	25.54239607	20.9409947	1.11E-05	2.23E-07	3.98E-07	X30 - X0_X3 - X0_X7 - X0	deltaB [Source:ZFIN;Acc:ZDB-GENE-980526-114]	5	38294022	38301923	1	2	KNOWN	0.816602663	-1.115316231	0.298713568	3	NA
ENSDARG00000004246	slit2	ENSDARG00000004246	2172.944377	-1.19972449	-1.603570674	-1.409913521	0.037408494	0.000126661	0.001109402	X30 - X0_X3 - X0_X7 - X0	slit (Drosophila) homolog 2 [Source:ZFIN;Acc:ZDB-GENE-010306-3]	1	22557443	22684130	1	1	KNOWN	-0.986079274	1.013362372	-0.027283098	1	NA
ENSDARG00000004301	rhogb	ENSDARG00000004301	275.9163431	3.330028249	27.49126686	13.72524677	0.000643241	1.38E-07	9.92E-07	X30 - X0_X3 - X0_X7 - X0	ras homolog gene family, member Gb [Source:ZFIN;Acc:ZDB-GENE-030131-8877]	21	29700744	29714963	1	1	KNOWN	1.043125863	-0.950417599	-0.092708264	2	NA
ENSDARG00000004372	fmnl3	ENSDARG00000004372	279.0137023	1.512186678	2.388656132	2.08274095	0.015429131	0.000135248	0.000481047	X30 - X0_X3 - X0_X7 - X0	formin-like 3 [Source:ZFIN;Acc:ZDB-GENE-030131-1571]	23	25642291	25736211	1	4	KNOWN	0.885992764	-1.084293986	0.198301222	3	NA
ENSDARG00000004378	yrk	ENSDARG00000004378	293.8601031	2.033986231	5.971663743	4.998738552	0.028842795	7.50E-05	0.000171803	X30 - X0_X3 - X0_X7 - X0	Yes-related kinase [Source:ZFIN;Acc:ZDB-GENE-030131-9517]	19	45151185	45224525	-1	8	KNOWN	0.798050457	-1.121753809	0.323703351	3	NA
ENSDARG00000004433	btk	ENSDARG00000004433	106.5084291	2.162997607	16.26045546	8.494430149	0.002394717	6.17E-08	5.19E-07	X30 - X0_X3 - X0_X7 - X0	Bruton agammaglobulinemia tyrosine kinase [Source:ZFIN;Acc:ZDB-GENE-070531-1]	14	40388026	40426337	-1	2	KNOWN	1.032140965	-0.964416076	-0.067724889	2	NA
ENSDARG00000004576	plk4	ENSDARG00000004576	115.5720931	1.450887148	3.728825466	2.669846789	0.015339539	1.82E-06	1.83E-05	X30 - X0_X3 - X0_X7 - X0	polo-like kinase 4 (Drosophila) [Source:ZFIN;Acc:ZDB-GENE-030619-14]	17	43455540	43473184	-1	1	KNOWN	0.975787979	-1.022569934	0.046781955	2	NA
ENSDARG00000004588	sox4a	ENSDARG00000004588	2729.177918	2.449620523	2.539456588	3.548288552	1.23E-05	9.16E-06	1.03E-06	X30 - X0_X3 - X0_X7 - X0	SRY-box containing gene 4a [Source:ZFIN;Acc:ZDB-GENE-030131-8290]	19	29272129	29275079	-1	1	KNOWN	-0.502151627	-0.649414502	1.151566129	5	NA
ENSDARG00000004618	stx2a	ENSDARG00000004618	82.51926395	2.494833687	7.844507374	5.972690546	0.000369438	3.79E-07	1.27E-06	X30 - X0_X3 - X0_X7 - X0	syntaxin 2a [Source:ZFIN;Acc:ZDB-GENE-040801-80]	21	16462514	16468324	-1	3	KNOWN	0.886708169	-1.083909677	0.197201507	3	NA
ENSDARG00000004713	mad2l1	ENSDARG00000004713	164.3320619	6.523238815	33.22719569	19.19069196	0.000104349	3.56E-07	1.66E-06	X30 - X0_X3 - X0_X7 - X0	MAD2 mitotic arrest deficient-like 1 (yeast) [Source:ZFIN;Acc:ZDB-GENE-030515-3]	7	58874321	58882730	-1	1	KNOWN	1.016643978	-0.982480471	-0.034163508	2	NA
ENSDARG00000004757	ybx1	ENSDARG00000004757	11419.56562	1.333062296	2.310631404	1.693179969	0.006242364	4.20E-06	0.000122311	X30 - X0_X3 - X0_X7 - X0	Y box binding protein 1 [Source:ZFIN;Acc:ZDB-GENE-000629-3]	8	49299968	49308225	-1	4	KNOWN	1.0753972	-0.901897236	-0.173499964	2	NA
ENSDARG00000004874	spata6l	ENSDARG00000004874	220.5854008	-1.26429435	-1.605210203	-1.807418799	0.014008822	0.000189	4.04E-05	X30 - X0_X3 - X0_X7 - X0	spermatogenesis associated 6-like [Source:ZFIN;Acc:ZDB-GENE-040426-1369]	7	72195886	72211300	1	1	KNOWN	-0.168437262	1.073522258	-0.905084996	7	NA
ENSDARG00000004875	TMC6 (1 of 2)	ENSDARG00000004875	105.2434173	1.569994189	4.204011922	2.786911416	0.026842039	7.57E-06	0.000120489	X30 - X0_X3 - X0_X7 - X0	transmembrane channel-like 6 [Source:HGNC Symbol;Acc:18021]	11	46410435	46430322	-1	1	KNOWN_BY_PROJECTION	1.024347461	-0.973730021	-0.05061744	2	NA
ENSDARG00000004954	grna	ENSDARG00000004954	3397.122558	4.631270316	39.21585667	24.02558699	1.37E-05	3.19E-08	7.78E-08	X30 - X0_X3 - X0_X7 - X0	granulin a [Source:ZFIN;Acc:ZDB-GENE-030131-8434]	3	30065546	30092476	-1	8	KNOWN	0.957126275	-1.037966365	0.08084009	2	NA
ENSDARG00000005023	fkbp9	ENSDARG00000005023	369.596124	2.006745123	8.180238511	5.375739916	0.000996842	2.58E-07	1.49E-06	X30 - X0_X3 - X0_X7 - X0	FK506 binding protein 9 [Source:ZFIN;Acc:ZDB-GENE-040801-23]	19	44193945	44210246	-1	2	KNOWN	0.968172219	-1.029046581	0.060874362	2	NA
ENSDARG00000005058	ncapd2	ENSDARG00000005058	367.9135227	3.630153598	17.5640269	10.59179423	2.71E-06	9.99E-09	3.23E-08	X30 - X0_X3 - X0_X7 - X0	non-SMC condensin I complex, subunit D2 [Source:ZFIN;Acc:ZDB-GENE-050506-59]	2	44811404	44839093	-1	4	KNOWN	1.000253292	-0.999746515	-0.000506776	2	Yes
ENSDARG00000005098	zgc:86764	ENSDARG00000005098	113.4119384	6.351001541	36.53892674	20.04747094	7.45E-06	2.00E-08	8.10E-08	X30 - X0_X3 - X0_X7 - X0	zgc:86764 [Source:ZFIN;Acc:ZDB-GENE-040718-435]	21	19138091	19150691	-1	2	KNOWN	1.029392433	-0.967756272	-0.061636161	2	NA
ENSDARG00000005162	tpm3	ENSDARG00000005162	3108.523925	1.478526654	4.845978282	2.881371718	0.004112459	2.18E-07	3.86E-06	X30 - X0_X3 - X0_X7 - X0	tropomyosin 3 [Source:ZFIN;Acc:ZDB-GENE-030826-16]	19	11477868	11521523	-1	4	KNOWN	1.050744666	-0.940042967	-0.110701699	2	NA
ENSDARG00000005191	ahcy	ENSDARG00000005191	1756.364729	2.106480125	6.012691266	4.697730459	1.51E-05	3.58E-08	8.62E-08	X30 - X0_X3 - X0_X7 - X0	S-adenosylhomocysteine hydrolase [Source:ZFIN;Acc:ZDB-GENE-031219-6]	6	49877781	49917954	1	1	KNOWN	0.875645194	-1.089692308	0.214047115	3	NA
ENSDARG00000005230	ssr2	ENSDARG00000005230	1357.528464	1.299993839	2.925385967	2.03900172	0.018851838	1.57E-06	3.17E-05	X30 - X0_X3 - X0_X7 - X0	signal sequence receptor, beta [Source:ZFIN;Acc:ZDB-GENE-010413-1]	19	11721333	11728971	-1	3	KNOWN	1.028815025	-0.968450169	-0.060364856	2	NA
ENSDARG00000005332	lipi	ENSDARG00000005332	3376.168053	1.589981684	2.928669096	1.857450906	0.005928521	2.33E-05	0.001006594	X30 - X0_X3 - X0_X7 - X0	lipase, member I [Source:ZFIN;Acc:ZDB-GENE-091118-47]	24	24694439	24709080	1	2	KNOWN	1.133938475	-0.755748608	-0.378189867	2	NA
ENSDARG00000005350	dip2ba	ENSDARG00000005350	1796.532311	1.349959149	2.909868435	2.170545711	0.006911474	1.05E-06	1.08E-05	X30 - X0_X3 - X0_X7 - X0	DIP2 disco-interacting protein 2 homolog Ba (Drosophila) [Source:ZFIN;Acc:ZDB-GENE-040426-2305]	23	27599359	27683181	-1	1	KNOWN	0.982190759	-1.016905216	0.034714457	2	NA
ENSDARG00000005368	mcamb	ENSDARG00000005368	931.0903054	2.381547978	5.181442284	4.931613814	0.000229073	2.03E-06	2.83E-06	X30 - X0_X3 - X0_X7 - X0	melanoma cell adhesion molecule b [Source:ZFIN;Acc:ZDB-GENE-030219-213]	15	22625410	22696300	-1	2	KNOWN	0.656089754	-1.150942001	0.494852247	3	NA
ENSDARG00000005414	grapa	ENSDARG00000005414	358.9848523	1.931821502	8.169921006	5.305482238	0.009642926	1.91E-06	1.14E-05	X30 - X0_X3 - X0_X7 - X0	GRB2-related adaptor protein a [Source:ZFIN;Acc:ZDB-GENE-050522-347]	3	39625712	39642803	-1	1	KNOWN	0.971711099	-1.026071391	0.054360292	2	NA
ENSDARG00000005419	il1b	ENSDARG00000005419	58.4605646	4.925075788	13.19945531	6.785636468	0.00042842	4.52E-06	7.71E-05	X30 - X0_X3 - X0_X7 - X0	interleukin 1, beta [Source:ZFIN;Acc:ZDB-GENE-040702-2]	10	46393914	46401024	-1	1	KNOWN	1.127873795	-0.778239317	-0.349634478	2	NA
ENSDARG00000005454	tacc3	ENSDARG00000005454	389.6139471	12.22482456	73.76532106	42.58889612	2.14E-06	2.32E-08	6.44E-08	X30 - X0_X3 - X0_X7 - X0	transforming, acidic coiled-coil containing protein 3 [Source:ZFIN;Acc:ZDB-GENE-050522-327]	13	36282172	36293842	-1	3	KNOWN	1.004370934	-0.995570986	-0.008799948	2	Yes
ENSDARG00000005462	KIF4A	ENSDARG00000005462	225.9170098	11.19441105	77.51236587	43.28905501	1.84E-05	6.17E-08	2.05E-07	X30 - X0_X3 - X0_X7 - X0	kinesin family member 4A [Source:HGNC Symbol;Acc:13339]	21	43273690	43308834	-1	2	KNOWN_BY_PROJECTION	1.010525794	-0.989130869	-0.021394925	2	NA
ENSDARG00000005464	dnase1l3	ENSDARG00000005464	96.76062348	2.193267869	4.83336532	3.969857635	0.002873201	1.51E-05	4.59E-05	X30 - X0_X3 - X0_X7 - X0	deoxyribonuclease I-like 3 [Source:ZFIN;Acc:ZDB-GENE-040426-2170]	23	19990137	20000538	1	1	KNOWN	0.867589282	-1.093693594	0.226104312	3	NA
ENSDARG00000005481	nfkbiaa	ENSDARG00000005481	171.9636065	2.860552065	6.327149278	5.52301581	0.001336435	1.72E-05	3.10E-05	X30 - X0_X3 - X0_X7 - X0	nuclear factor of kappa light polypeptide gene enhancer in B-cells inhibitor, alpha a [Source:ZFIN;Acc:ZDB-GENE-040426-2227]	20	16922347	16925201	1	3	KNOWN	0.784592189	-1.125993118	0.341400929	3	NA
ENSDARG00000005513	naca	ENSDARG00000005513	11701.79381	1.286987541	1.916520496	1.746709779	0.016426501	3.40E-05	0.000108118	X30 - X0_X3 - X0_X7 - X0	nascent polypeptide-associated complex alpha polypeptide [Source:ZFIN;Acc:ZDB-GENE-020423-4]	23	18036671	18045059	1	4	KNOWN	0.818071855	-1.114775844	0.296703989	3	NA
ENSDARG00000005600	bmpr1ba	ENSDARG00000005600	150.8232918	-1.268839447	-1.831211477	-1.950800857	0.042588341	0.000220802	0.000109413	X30 - X0_X3 - X0_X7 - X0	bone morphogenetic protein receptor, type 1ba [Source:ZFIN;Acc:ZDB-GENE-991208-8]	5	8817825	8842843	-1	1	KNOWN	-0.405310587	1.139027279	-0.733716692	1	NA
ENSDARG00000005619	nek2	ENSDARG00000005619	67.04733347	2.469899297	7.033032397	5.06068957	0.006127642	1.08E-05	6.50E-05	X30 - X0_X3 - X0_X7 - X0	NIMA (never in mitosis gene a)-related kinase 2 [Source:ZFIN;Acc:ZDB-GENE-040426-752]	20	13797905	13808684	1	2	KNOWN	0.951913101	-1.041991961	0.090078861	2	NA
ENSDARG00000005625	tmem57a	ENSDARG00000005625	448.9929513	-1.18361626	-1.338344561	-1.320680433	0.03490911	0.001766346	0.00233199	X30 - X0_X3 - X0_X7 - X0	transmembrane protein 57a [Source:ZFIN;Acc:ZDB-GENE-040426-1097]	19	29786602	29816622	1	2	KNOWN	-0.678483315	1.148404987	-0.469921671	1	NA
ENSDARG00000005627	CABZ01068209.1	ENSDARG00000005627	34.05806013	1.835655281	1.814882685	1.871723282	0.014360081	0.016770788	0.012898638	X30 - X0_X3 - X0_X7 - X0	Uncharacterized protein [Source:UniProtKB/TrEMBL;Acc:F1QUY8]	17	53870945	53875449	1	1	NOVEL	-0.899511315	-0.177268701	1.076780016	8	NA
ENSDARG00000005762	col14a1a	ENSDARG00000005762	396.5890159	-1.343314869	-2.293349688	-1.858132604	0.040306572	0.00011206	0.000832707	X30 - X0_X3 - X0_X7 - X0	collagen, type XIV, alpha 1a [Source:ZFIN;Acc:ZDB-GENE-030131-9889]	16	16979935	17345861	1	4	KNOWN	-0.970935595	1.026728412	-0.055792817	1	NA
ENSDARG00000005789	enpp1	ENSDARG00000005789	554.2240965	2.731162118	10.8431587	7.040116298	3.71E-05	6.49E-08	2.60E-07	X30 - X0_X3 - X0_X7 - X0	ectonucleotide pyrophosphatase/phosphodiesterase 1 [Source:ZFIN;Acc:ZDB-GENE-040724-172]	20	13318055	13435784	1	6	KNOWN	0.978577217	-1.020127542	0.041550325	2	NA
ENSDARG00000005791	rpl28	ENSDARG00000005791	5684.629896	1.498210708	2.864575956	2.317382166	0.001607742	1.86E-06	9.79E-06	X30 - X0_X3 - X0_X7 - X0	ribosomal protein L28 [Source:ZFIN;Acc:ZDB-GENE-040930-10]	16	55535267	55539621	-1	1	KNOWN	0.927544298	-1.059377876	0.131833578	3	NA
ENSDARG00000005821	ncf2	ENSDARG00000005821	355.5806161	2.332725746	15.18478426	9.700909362	0.000500349	6.49E-08	2.30E-07	X30 - X0_X3 - X0_X7 - X0	neutrophil cytosolic factor 2 [Source:ZFIN;Acc:ZDB-GENE-070209-29]	7	44060421	44068550	-1	2	KNOWN	0.947738845	-1.045134082	0.097395236	2	NA
ENSDARG00000005827	eif2s1a	ENSDARG00000005827	931.6576547	1.347185556	3.018575886	1.924588865	0.002850123	2.75E-07	1.20E-05	X30 - X0_X3 - X0_X7 - X0	eukaryotic translation initiation factor 2, subunit 1 alpha a [Source:ZFIN;Acc:ZDB-GENE-030131-526]	17	34411475	34421363	1	1	KNOWN	1.085871899	-0.883026621	-0.202845277	2	NA
ENSDARG00000005915	tcf3a	ENSDARG00000005915	124.891506	1.403515102	2.492364955	2.592724517	0.037336306	8.19E-05	6.09E-05	X30 - X0_X3 - X0_X7 - X0	transcription factor 3a [Source:ZFIN;Acc:ZDB-GENE-990415-51]	2	57776875	57853745	-1	6	KNOWN	0.499592703	-1.151353531	0.651760828	4	NA
ENSDARG00000005926	ak2	ENSDARG00000005926	1087.837771	1.4045902	3.56027035	2.397056055	0.002476477	2.23E-07	3.29E-06	X30 - X0_X3 - X0_X7 - X0	adenylate kinase 2 [Source:ZFIN;Acc:ZDB-GENE-030131-512]	19	36967043	36977274	-1	2	KNOWN	1.025331276	-0.972580663	-0.052750613	2	NA
ENSDARG00000005974	atad5b	ENSDARG00000005974	35.63622645	1.811987086	4.160254031	2.988946212	0.006317861	6.36E-06	6.11E-05	X30 - X0_X3 - X0_X7 - X0	ATPase family, AAA domain containing 5b [Source:ZFIN;Acc:ZDB-GENE-030131-338]	6	19347557	19365601	-1	3	KNOWN	0.99919684	-1.000801229	0.001604389	2	NA
ENSDARG00000005989	rgl1	ENSDARG00000005989	579.3203877	1.728007869	4.141171439	4.063978379	0.000862597	9.00E-07	9.79E-07	X30 - X0_X3 - X0_X7 - X0	ral guanine nucleotide dissociation stimulator-like 1 [Source:ZFIN;Acc:ZDB-GENE-040426-1816]	8	19808088	19867056	-1	4	KNOWN	0.605263439	-1.154243208	0.548979769	4	NA
ENSDARG00000005993	prc1b	ENSDARG00000005993	154.0802088	13.08488538	97.1288479	40.48530186	1.52E-05	4.30E-08	2.91E-07	X30 - X0_X3 - X0_X7 - X0	protein regulator of cytokinesis 1b [Source:ZFIN;Acc:ZDB-GENE-040426-777]	7	51810285	51824630	-1	3	KNOWN	1.094124313	-0.866701002	-0.227423311	2	NA
ENSDARG00000006008	dct	ENSDARG00000006008	2053.673086	1.502024706	2.847770414	2.885036407	0.044726399	0.000209815	0.000175774	X30 - X0_X3 - X0_X7 - X0	dopachrome tautomerase [Source:ZFIN;Acc:ZDB-GENE-000508-1]	9	55311304	55336342	1	3	KNOWN	0.553541224	-1.154377634	0.600836409	4	NA
ENSDARG00000006029	lta4h	ENSDARG00000006029	647.0770815	1.909938327	7.320404229	5.294951477	0.002178131	6.33E-07	2.34E-06	X30 - X0_X3 - X0_X7 - X0	leukotriene A4 hydrolase [Source:ZFIN;Acc:ZDB-GENE-040426-2477]	4	6723923	6743481	-1	2	KNOWN	0.906746051	-1.072532698	0.165786647	3	NA
ENSDARG00000006074	uck2a	ENSDARG00000006074	1016.436475	1.354818516	2.244144376	1.845656847	0.011943216	1.85E-05	0.000144583	X30 - X0_X3 - X0_X7 - X0	uridine-cytidine kinase 2a [Source:ZFIN;Acc:ZDB-GENE-030131-7158]	8	21652356	21671137	1	2	KNOWN	0.963655091	-1.032760072	0.069104982	2	NA
ENSDARG00000006079	gpr37l1a	ENSDARG00000006079	23.05853653	2.745598325	10.18975811	4.01635562	0.006942599	4.71E-06	0.000599361	X30 - X0_X3 - X0_X7 - X0	G protein-coupled receptor 37 like 1a [Source:ZFIN;Acc:ZDB-GENE-110411-20]	22	656055	660229	1	2	KNOWN	1.139906796	-0.72951333	-0.410393466	2	NA
ENSDARG00000006112	myof	ENSDARG00000006112	101.1610748	9.736372536	77.66159214	53.39682438	0.000327806	2.23E-07	6.41E-07	X30 - X0_X3 - X0_X7 - X0	myoferlin [Source:ZFIN;Acc:ZDB-GENE-040426-1138]	12	11596559	11646274	-1	2	KNOWN	0.892767695	-1.08059547	0.187827775	3	NA
ENSDARG00000006128	cep170a	ENSDARG00000006128	540.0893997	1.612081175	2.152394214	2.311983109	0.002645464	8.38E-05	4.43E-05	X30 - X0_X3 - X0_X7 - X0	centrosomal protein 170a [Source:ZFIN;Acc:ZDB-GENE-090312-109]	13	10548463	10638162	-1	3	KNOWN	0.3459836	-1.127047098	0.781063498	4	NA
ENSDARG00000006174	lrrc23	ENSDARG00000006174	10.28265722	3.489753067	27.82259204	9.818283774	0.000117538	1.09E-07	2.78E-06	X30 - X0_X3 - X0_X7 - X0	leucine rich repeat containing 23 [Source:ZFIN;Acc:ZDB-GENE-041010-153]	23	20416433	20422544	-1	2	KNOWN	1.117842439	-0.809562819	-0.30827962	2	NA
ENSDARG00000006220	ugt1ab	ENSDARG00000006220	177.2245918	1.80820336	9.120464663	4.392600803	0.019158009	1.27E-06	3.41E-05	X30 - X0_X3 - X0_X7 - X0	UDP glucuronosyltransferase 1 family a, b [Source:ZFIN;Acc:ZDB-GENE-040426-2762]	9	10194767	10228512	-1	11	KNOWN	1.082320387	-0.88963822	-0.192682167	2	NA
ENSDARG00000006283	waslb	ENSDARG00000006283	3863.29361	-1.268037051	-1.792233236	-1.88678909	0.034262029	0.000147603	8.19E-05	X30 - X0_X3 - X0_X7 - X0	Wiskott-Aldrich syndrome-like b [Source:ZFIN;Acc:ZDB-GENE-040426-718]	4	3951892	3984241	1	1	KNOWN	-0.429669377	1.143025493	-0.713356116	1	NA
ENSDARG00000006316	rpl23a	ENSDARG00000006316	9322.25036	1.43359731	2.88962238	2.221134898	0.003199489	1.68E-06	1.37E-05	X30 - X0_X3 - X0_X7 - X0	ribosomal protein L23a [Source:ZFIN;Acc:ZDB-GENE-030131-7479]	21	25465361	25468127	1	4	KNOWN	0.971663365	-1.026111914	0.054448549	2	NA
ENSDARG00000006385	triobp	ENSDARG00000006385	192.6478099	1.250589864	1.646761668	1.357789203	0.0164332	9.54E-05	0.002698133	X30 - X0_X3 - X0_X7 - X0	TRIO and F-actin binding protein [Source:ZFIN;Acc:ZDB-GENE-061215-80]	3	1940165	1953609	1	1	KNOWN	1.11450028	-0.818816277	-0.295684003	2	NA
ENSDARG00000006396	nrcam	ENSDARG00000006396	1601.461194	-1.196680736	-1.563861731	-1.483924378	0.047319274	0.00026648	0.000609472	X30 - X0_X3 - X0_X7 - X0	neuronal cell adhesion molecule [Source:ZFIN;Acc:ZDB-GENE-041210-235]	4	12761061	12796409	1	4	KNOWN	-0.771833646	1.129694086	-0.35786044	1	NA
ENSDARG00000006413	rpl38	ENSDARG00000006413	3683.117668	1.313530267	2.736268692	2.139837533	0.021402321	3.69E-06	2.97E-05	X30 - X0_X3 - X0_X7 - X0	ribosomal protein L38 [Source:ZFIN;Acc:ZDB-GENE-030131-8752]	12	40099735	40105115	1	2	KNOWN	0.94205237	-1.04930207	0.1072497	2	NA
ENSDARG00000006456	pdgfrl	ENSDARG00000006456	250.6910371	1.52213453	2.793166803	2.651511517	0.03367601	0.000140604	0.000219968	X30 - X0_X3 - X0_X7 - X0	platelet-derived growth factor receptor-like [Source:ZFIN;Acc:ZDB-GENE-040426-901]	14	31228750	31235825	-1	1	KNOWN	0.676041409	-1.148715474	0.472674065	3	NA
ENSDARG00000006468	grap2a	ENSDARG00000006468	123.8561584	2.439237125	10.68827592	5.683783766	0.00925552	3.79E-06	5.46E-05	X30 - X0_X3 - X0_X7 - X0	GRB2-related adaptor protein 2a [Source:ZFIN;Acc:ZDB-GENE-050417-275]	3	29596592	29619978	1	2	KNOWN	1.063082501	-0.921915042	-0.141167458	2	NA
ENSDARG00000006526	fn1b	ENSDARG00000006526	964.8985841	1.718136481	2.631657719	2.614416974	0.004596739	9.78E-05	0.000106254	X30 - X0_X3 - X0_X7 - X0	fibronectin 1b [Source:ZFIN;Acc:ZDB-GENE-030131-6545]	1	4393282	4432219	-1	6	KNOWN	0.593769512	-1.154543386	0.560773873	4	NA
ENSDARG00000006553	rras	ENSDARG00000006553	404.7185272	1.720119575	6.999338318	4.983171609	0.022027974	2.95E-06	1.45E-05	X30 - X0_X3 - X0_X7 - X0	related RAS viral (r-ras) oncogene homolog [Source:ZFIN;Acc:ZDB-GENE-041010-217]	3	32547722	32553097	1	5	KNOWN	0.912823034	-1.068837497	0.156014463	3	NA
ENSDARG00000006600	lsm14aa	ENSDARG00000006600	4058.087237	-1.263496862	-1.385650495	-1.321296259	0.039401709	0.007794836	0.017676486	X30 - X0_X3 - X0_X7 - X0	LSM14 homolog Aa (SCD6, S. cerevisiae) [Source:ZFIN;Acc:ZDB-GENE-040426-1567]	25	36976547	36998536	1	5	KNOWN	-1.017398728	0.981642141	0.035756587	1	NA
ENSDARG00000006603	csrp1a	ENSDARG00000006603	366.340724	2.439106951	10.06322977	7.969028261	0.012503249	1.18E-05	2.78E-05	X30 - X0_X3 - X0_X7 - X0	cysteine and glycine-rich protein 1a [Source:ZFIN;Acc:ZDB-GENE-030909-4]	23	5815381	5868859	-1	3	KNOWN	0.822408032	-1.113153994	0.290745962	3	NA
ENSDARG00000006691	rpl12	ENSDARG00000006691	11604.62335	1.514638428	2.968869321	2.497898814	0.001737925	1.94E-06	6.98E-06	X30 - X0_X3 - X0_X7 - X0	ribosomal protein L12 [Source:ZFIN;Acc:ZDB-GENE-030131-5297]	5	34500586	34504918	1	4	KNOWN	0.864868034	-1.095006626	0.230138593	3	NA
ENSDARG00000006693	tmprss4a	ENSDARG00000006693	5.047144172	3.29834425	3.76179357	5.954421933	0.029074301	0.01461594	0.001089937	X30 - X0_X3 - X0_X7 - X0	transmembrane protease, serine 4a [Source:ZFIN;Acc:ZDB-GENE-061103-631]	15	13002899	13033028	-1	3	KNOWN	-0.406267469	-0.732927192	1.139194661	5	NA
ENSDARG00000006705	pkn2	ENSDARG00000006705	94.40206042	2.033446624	3.525145127	3.287806495	0.007831388	0.000102254	0.000162117	X30 - X0_X3 - X0_X7 - X0	protein kinase N2 [Source:ZFIN;Acc:ZDB-GENE-061207-42]	2	23068424	23128679	-1	2	KNOWN	0.719037293	-1.141975692	0.422938399	3	NA
ENSDARG00000006729	eif3s6ip	ENSDARG00000006729	2438.022858	1.219320705	2.015310248	1.62316367	0.011700466	2.28E-06	3.38E-05	X30 - X0_X3 - X0_X7 - X0	eukaryotic translation initiation factor 3, subunit 6 interacting protein [Source:ZFIN;Acc:ZDB-GENE-040426-2138]	13	43886612	43922171	-1	2	KNOWN	0.995066143	-1.004861888	0.009795745	2	NA
ENSDARG00000006754	mllt3	ENSDARG00000006754	133.3667519	1.741947124	2.157411665	2.387508423	0.001407667	0.000117402	4.56E-05	X30 - X0_X3 - X0_X7 - X0	myeloid/lymphoid or mixed lineage-leukemia translocation to 3 homolog (Drosophila) [Source:ZFIN;Acc:ZDB-GENE-050417-356]	7	19994259	20096062	-1	6	KNOWN	0.188850474	-1.080960398	0.892109924	4	NA
ENSDARG00000006782	rb1	ENSDARG00000006782	312.3625922	1.537840619	4.731102254	2.883078632	0.003907518	3.54E-07	6.28E-06	X30 - X0_X3 - X0_X7 - X0	retinoblastoma 1 [Source:ZFIN;Acc:ZDB-GENE-040428-1]	21	22075717	22132576	-1	1	KNOWN	1.048162072	-0.943625078	-0.104536994	2	NA
ENSDARG00000006838	eef1a2	ENSDARG00000006838	286.6251584	-1.415407991	-2.023443551	-1.676284146	0.016247137	0.00021788	0.00151377	X30 - X0_X3 - X0_X7 - X0	eukaryotic translation elongation factor 1 alpha 2 [Source:ZFIN;Acc:ZDB-GENE-040718-64]	23	16054324	16082265	-1	1	KNOWN	-1.043804322	0.949516944	0.094287379	6	NA
ENSDARG00000006840	gnmt	ENSDARG00000006840	126.8170727	1.383789701	2.935874556	2.285704115	0.04271487	1.51E-05	0.000121071	X30 - X0_X3 - X0_X7 - X0	glycine N-methyltransferase [Source:ZFIN;Acc:ZDB-GENE-040227-1]	17	49077695	49091737	-1	1	KNOWN	0.941813714	-1.049474223	0.107660509	2	NA
ENSDARG00000006848	PARP9	ENSDARG00000006848	101.2489039	6.605369999	10.98689221	13.41199244	8.99E-05	8.83E-06	4.33E-06	X30 - X0_X3 - X0_X7 - X0	poly (ADP-ribose) polymerase family, member 9 [Source:HGNC Symbol;Acc:24118]	9	24791153	24798825	-1	2	KNOWN_BY_PROJECTION	0.189034276	-1.081025897	0.891991621	4	NA
ENSDARG00000006859	nkain1	ENSDARG00000006859	481.3582631	1.809566609	2.283049382	2.958702226	0.002089011	0.000205998	2.86E-05	X30 - X0_X3 - X0_X7 - X0	Na+/K+ transporting ATPase interacting 1 [Source:ZFIN;Acc:ZDB-GENE-040426-1472]	19	44620667	44634278	1	3	KNOWN	-0.116687787	-0.936536989	1.053224776	5	NA
ENSDARG00000006901	AEBP1 (2 of 2)	ENSDARG00000006901	206.6877253	3.224364068	3.989765214	6.019976926	0.001519701	0.000359143	4.79E-05	X30 - X0_X3 - X0_X7 - X0	AE binding protein 1 [Source:HGNC Symbol;Acc:303]	8	46740295	46781412	-1	3	KNOWN_BY_PROJECTION	-0.291826551	-0.821623777	1.113450328	5	NA
ENSDARG00000006944	gdpd3b	ENSDARG00000006944	94.97109444	-1.711810165	-5.842896884	-3.713893868	0.043259136	4.39E-05	0.000309328	X30 - X0_X3 - X0_X7 - X0	glycerophosphodiester phosphodiesterase domain containing 3b [Source:ZFIN;Acc:ZDB-GENE-121210-2]	12	4573545	4584524	-1	1	KNOWN	-1.010082104	0.989603336	0.020478768	1	NA
ENSDARG00000007018	ms4a17a.6	ENSDARG00000007018	44.70494954	4.513949579	10.05157884	11.6762891	0.000234303	3.67E-06	2.10E-06	X30 - X0_X3 - X0_X7 - X0	membrane-spanning 4-domains, subfamily A, member 17A.6 [Source:ZFIN;Acc:ZDB-GENE-070209-265]	4	60662692	60784612	1	2	KNOWN	0.347343719	-1.127356428	0.780012709	4	NA
ENSDARG00000007097	her13	ENSDARG00000007097	24.75879165	5.554021762	70.4936754	14.04040887	0.004891375	2.35E-07	8.28E-05	X30 - X0_X3 - X0_X7 - X0	hairy-related 13 [Source:ZFIN;Acc:ZDB-GENE-050228-1]	15	7114862	7117817	1	1	KNOWN	1.14632764	-0.693370749	-0.452956891	2	NA
ENSDARG00000007099	cx43.4	ENSDARG00000007099	524.4413073	2.555325111	6.190844453	6.568918688	0.000284793	2.08E-06	1.74E-06	X30 - X0_X3 - X0_X7 - X0	connexin 43.4 [Source:ZFIN;Acc:ZDB-GENE-990415-38]	9	47606307	47616531	-1	1	KNOWN	0.489947676	-1.150492174	0.660544497	4	NA
ENSDARG00000007108	zgc:91985	ENSDARG00000007108	14.85605168	14.72392811	17.18808999	15.66355972	0.006197474	0.002570853	0.00443858	X30 - X0_X3 - X0_X7 - X0	zgc:91985 [Source:ZFIN;Acc:ZDB-GENE-040801-242]	21	33910850	33938689	-1	2	KNOWN	1.06912815	-0.912352044	-0.156776106	2	NA
ENSDARG00000007130	mrto4	ENSDARG00000007130	362.2522116	1.404263607	3.715611556	2.039725804	0.002796686	1.82E-07	1.54E-05	X30 - X0_X3 - X0_X7 - X0	mRNA turnover 4 homolog (S. cerevisiae) [Source:ZFIN;Acc:ZDB-GENE-050417-142]	11	42951291	42959301	-1	1	KNOWN	1.113070805	-0.822627563	-0.290443242	2	NA
ENSDARG00000007219	actn1	ENSDARG00000007219	628.7092214	1.482784835	4.798988874	3.377144735	0.025436385	2.46E-06	1.75E-05	X30 - X0_X3 - X0_X7 - X0	actinin, alpha 1 [Source:ZFIN;Acc:ZDB-GENE-081113-4]	13	36722687	36793101	-1	6	KNOWN	0.94929758	-1.043969068	0.094671487	2	NA
ENSDARG00000007221	pbk	ENSDARG00000007221	161.1248158	8.62249077	60.16403588	32.21284594	0.00012331	2.44E-07	1.21E-06	X30 - X0_X3 - X0_X7 - X0	PDZ binding kinase [Source:ZFIN;Acc:ZDB-GENE-030523-2]	20	39384438	39392715	-1	2	KNOWN	1.026978169	-0.970639913	-0.056338257	2	NA
ENSDARG00000007247	ric8a	ENSDARG00000007247	7140.579554	-1.25972479	-1.842160393	-1.910452498	0.047509428	0.000187641	0.000123537	X30 - X0_X3 - X0_X7 - X0	resistance to inhibitors of cholinesterase 8 homolog A [Source:ZFIN;Acc:ZDB-GENE-040927-18]	25	10670168	10694369	1	2	KNOWN	-0.479230388	1.149424886	-0.670194499	1	NA
ENSDARG00000007275	si:ch211-251b21.1	ENSDARG00000007275	7137.96528	1.452335565	2.506183826	2.223383796	0.011189306	3.19E-05	8.99E-05	X30 - X0_X3 - X0_X7 - X0	si:ch211-251b21.1 [Source:ZFIN;Acc:ZDB-GENE-060809-5]	8	49792469	49824057	1	2	KNOWN	0.816848991	-1.115225949	0.298376958	3	NA
ENSDARG00000007278	ect2	ENSDARG00000007278	153.6947701	3.101743853	12.00721348	6.986318393	0.000949094	1.59E-06	1.21E-05	X30 - X0_X3 - X0_X7 - X0	epithelial cell transforming sequence 2 oncogene [Source:ZFIN;Acc:ZDB-GENE-040831-2]	11	10452631	10520382	-1	2	KNOWN	1.039715188	-0.954879715	-0.084835473	2	NA
ENSDARG00000007320	rpl7	ENSDARG00000007320	15019.4729	1.508716127	2.984020734	2.416691408	0.003097546	3.21E-06	1.61E-05	X30 - X0_X3 - X0_X7 - X0	ribosomal protein L7 [Source:ZFIN;Acc:ZDB-GENE-030131-8654]	2	29892308	29897185	-1	2	KNOWN	0.914939677	-1.067522328	0.152582651	3	NA
ENSDARG00000007354	pdia3	ENSDARG00000007354	3161.755141	1.414956128	4.447962792	2.546093101	0.009862603	4.29E-07	1.33E-05	X30 - X0_X3 - X0_X7 - X0	protein disulfide isomerase family A, member 3 [Source:ZFIN;Acc:ZDB-GENE-031002-9]	25	31332644	31346659	-1	2	KNOWN	1.073216126	-0.905600421	-0.167615706	2	NA
ENSDARG00000007358	cxcr3.1	ENSDARG00000007358	25.70816415	11.71206103	5.758436887	15.01523054	0.000451706	0.012285142	0.000170121	X30 - X0_X3 - X0_X7 - X0	chemokine (C-X-C motif) receptor 3, tandem duplicate 1 [Source:ZFIN;Acc:ZDB-GENE-060130-38]	16	13603464	13609316	-1	2	KNOWN	-1.080773943	0.188327654	0.892446289	8	NA
ENSDARG00000007362	sft2d1	ENSDARG00000007362	331.407407	1.359960716	3.072636775	2.320947176	0.015928586	2.18E-06	1.90E-05	X30 - X0_X3 - X0_X7 - X0	SFT2 domain containing 1 [Source:ZFIN;Acc:ZDB-GENE-040426-1350]	13	4023088	4055400	1	2	KNOWN	0.956886412	-1.03815411	0.081267697	2	NA
ENSDARG00000007370	dysf	ENSDARG00000007370	199.9186062	2.121867129	7.731069581	6.865922667	0.000770357	3.08E-07	5.01E-07	X30 - X0_X3 - X0_X7 - X0	dysferlin, limb girdle muscular dystrophy 2B (autosomal recessive) [Source:ZFIN;Acc:ZDB-GENE-070501-1]	7	26728112	26864332	-1	5	KNOWN	0.714638825	-1.142792844	0.428154019	3	NA
ENSDARG00000007425	apol1	ENSDARG00000007425	89.65599526	2.514309444	7.964829747	4.993485579	0.003054232	4.43E-06	4.11E-05	X30 - X0_X3 - X0_X7 - X0	apolipoprotein L, 1 [Source:ZFIN;Acc:ZDB-GENE-030131-3217]	2	37670743	37677483	1	3	KNOWN	1.028702153	-0.968585499	-0.060116654	2	NA
ENSDARG00000007624	gins1	ENSDARG00000007624	62.51927509	3.112180451	14.47116708	9.05138681	0.001458784	8.09E-07	4.74E-06	X30 - X0_X3 - X0_X7 - X0	GINS complex subunit 1 (Psf1 homolog) [Source:ZFIN;Acc:ZDB-GENE-041010-184]	13	9412733	9418548	-1	1	KNOWN	0.984414245	-1.014889097	0.030474852	2	NA
ENSDARG00000007697	fabp7a	ENSDARG00000007697	10745.68995	7.413641126	13.67065844	11.88752914	8.62E-08	1.95E-08	2.39E-08	X30 - X0_X3 - X0_X7 - X0	fatty acid binding protein 7, brain, a [Source:ZFIN;Acc:ZDB-GENE-000627-1]	17	15274757	15277126	1	3	KNOWN	0.8314111	-1.109655611	0.278244511	3	Yes
ENSDARG00000007708	nsa2	ENSDARG00000007708	2675.23725	1.299578173	1.532686741	1.900799945	0.017494562	0.00097596	6.18E-05	X30 - X0_X3 - X0_X7 - X0	NSA2 ribosome biogenesis homolog (S. cerevisiae) [Source:ZFIN;Acc:ZDB-GENE-030131-488]	21	4041162	4047784	-1	1	KNOWN	-0.148457904	-0.917471703	1.065929606	5	NA
ENSDARG00000007734	obfc1	ENSDARG00000007734	174.2113066	1.251142041	1.748124832	1.510357268	0.047457007	0.00023991	0.001932442	X30 - X0_X3 - X0_X7 - X0	oligonucleotide/oligosaccharide-binding fold containing 1 [Source:ZFIN;Acc:ZDB-GENE-040426-1390]	1	47996995	48010591	1	1	KNOWN	0.985308956	-1.014070527	0.028761571	2	NA
ENSDARG00000007774	vash2	ENSDARG00000007774	2707.931067	-1.332541522	-1.885573672	-1.597125418	0.003581975	1.61E-05	0.000142413	X30 - X0_X3 - X0_X7 - X0	vasohibin 2 [Source:ZFIN;Acc:ZDB-GENE-041014-355]	20	37890779	37941130	1	4	KNOWN	-1.014069284	0.985310311	0.028758973	1	NA
ENSDARG00000007783	blk	ENSDARG00000007783	16.57500397	4.872059365	7.402223569	9.316309988	0.035740621	0.006585953	0.001834788	X30 - X0_X3 - X0_X7 - X0	B lymphoid tyrosine kinase [Source:ZFIN;Acc:ZDB-GENE-040724-106]	20	19247191	19269016	1	2	KNOWN	0.092121128	-1.042873121	0.950751993	4	NA
ENSDARG00000007792	dyx1c1	ENSDARG00000007792	8.937145414	4.489174744	12.36489268	8.7219552	0.034351923	0.000827405	0.002987425	X30 - X0_X3 - X0_X7 - X0	dyslexia susceptibility 1 candidate 1 [Source:ZFIN;Acc:ZDB-GENE-040426-1892]	13	52285611	52297590	1	1	KNOWN	0.974125143	-1.024007777	0.049882634	2	NA
ENSDARG00000007823	atf3	ENSDARG00000007823	2763.44888	3.211300838	25.59575527	16.10355364	0.000119979	7.06E-08	2.06E-07	X30 - X0_X3 - X0_X7 - X0	activating transcription factor 3 [Source:ZFIN;Acc:ZDB-GENE-040426-728]	20	37819241	37825345	1	2	KNOWN	0.945739207	-1.046614333	0.100875126	2	NA
ENSDARG00000007825	map2k1	ENSDARG00000007825	1474.250054	-1.184943841	-1.36193153	-1.346754968	0.044612829	0.001786279	0.002264947	X30 - X0_X3 - X0_X7 - X0	mitogen-activated protein kinase kinase 1 [Source:ZFIN;Acc:ZDB-GENE-040426-2759]	18	19199831	19231876	1	1	KNOWN	-0.652975386	1.151240601	-0.498265214	1	NA
ENSDARG00000007869	ehd3	ENSDARG00000007869	224.1229353	-1.266430078	-1.899397522	-1.533666456	0.041203827	0.00016025	0.002271103	X30 - X0_X3 - X0_X7 - X0	EH-domain containing 3 [Source:ZFIN;Acc:ZDB-GENE-041014-352]	20	38226353	38266568	1	1	KNOWN	-1.047649842	0.944327425	0.103322417	6	NA
ENSDARG00000007889	csf1ra	ENSDARG00000007889	614.4238048	2.1020353	5.198139005	3.679621589	0.000316152	9.21E-07	5.56E-06	X30 - X0_X3 - X0_X7 - X0	colony stimulating factor 1 receptor, a [Source:ZFIN;Acc:ZDB-GENE-001205-1]	15	43673437	43704576	1	1	KNOWN	0.993580242	-1.00629844	0.012718198	2	NA
ENSDARG00000007955	iars	ENSDARG00000007955	974.0973463	1.300773177	2.621561755	1.773377205	0.019189202	3.59E-06	0.000159373	X30 - X0_X3 - X0_X7 - X0	isoleucyl-tRNA synthetase [Source:ZFIN;Acc:ZDB-GENE-030131-6325]	11	1302660	1357500	-1	1	KNOWN	1.080324381	-0.893254846	-0.187069535	2	NA
ENSDARG00000007971	cks1b	ENSDARG00000007971	138.2518806	6.666586424	36.82738382	20.00219621	2.33E-05	6.17E-08	2.96E-07	X30 - X0_X3 - X0_X7 - X0	CDC28 protein kinase regulatory subunit 1B [Source:ZFIN;Acc:ZDB-GENE-040801-112]	19	8457561	8460768	1	1	KNOWN	1.036257009	-0.959295773	-0.076961236	2	NA
ENSDARG00000008022	kif18a	ENSDARG00000008022	76.4616732	2.75545358	10.15425415	6.063217292	0.005586694	7.59E-06	6.78E-05	X30 - X0_X3 - X0_X7 - X0	kinesin family member 18A [Source:ZFIN;Acc:ZDB-GENE-040426-862]	7	33311274	33356363	-1	2	KNOWN	1.033359885	-0.962914759	-0.070445126	2	NA
ENSDARG00000008026	fam129bb	ENSDARG00000008026	278.4456854	2.095686316	12.1362327	6.721335953	0.005263784	4.52E-07	3.96E-06	X30 - X0_X3 - X0_X7 - X0	family with sequence similarity 129, member Bb [Source:ZFIN;Acc:ZDB-GENE-030131-6218]	5	30556333	30608487	-1	1	KNOWN	1.025146827	-0.972796715	-0.052350111	2	NA
ENSDARG00000008049	si:dkey-42i9.4	ENSDARG00000008049	495.3303017	1.411293566	2.50784207	2.141020265	0.034880558	9.81E-05	0.000363758	X30 - X0_X3 - X0_X7 - X0	si:dkey-42i9.4 [Source:ZFIN;Acc:ZDB-GENE-030131-8398]	22	10650596	10651862	-1	1	KNOWN	0.87387324	-1.090587269	0.216714029	3	NA
ENSDARG00000008068	tma16	ENSDARG00000008068	153.8249333	1.364751837	3.02356736	1.972344194	0.032174069	6.91E-06	0.000266965	X30 - X0_X3 - X0_X7 - X0	translation machinery associated 16 homolog (S. cerevisiae) [Source:ZFIN;Acc:ZDB-GENE-050522-20]	1	18501265	18505933	-1	2	KNOWN	1.076390523	-0.900186397	-0.176204126	2	NA
ENSDARG00000008100	slc7a10a	ENSDARG00000008100	891.2214146	-1.349913752	-2.357227144	-2.411747021	0.00345364	2.46E-06	2.08E-06	X30 - X0_X3 - X0_X7 - X0	solute carrier family 7 (neutral amino acid transporter light chain, asc system), member 10a [Source:ZFIN;Acc:ZDB-GENE-080116-1]	7	39707751	39732776	-1	1	KNOWN	-0.531159657	1.153499906	-0.622340249	1	NA
ENSDARG00000008165	caspa	ENSDARG00000008165	74.66609355	3.531155556	15.43150295	9.578204363	0.002808853	2.52E-06	1.85E-05	X30 - X0_X3 - X0_X7 - X0	caspase a [Source:ZFIN;Acc:ZDB-GENE-000616-3]	16	44763011	44774004	-1	1	KNOWN	0.994529045	-1.005382603	0.010853558	2	NA
ENSDARG00000008182	si:ch73-111e15.1	ENSDARG00000008182	31.16389467	4.232933385	27.21004069	22.15326185	0.016301609	9.80E-06	2.14E-05	X30 - X0_X3 - X0_X7 - X0	si:ch73-111e15.1 [Source:ZFIN;Acc:ZDB-GENE-110411-28]	10	22311052	22317331	-1	2	KNOWN	0.773960641	-1.12909803	0.355137389	3	NA
ENSDARG00000008186	syk	ENSDARG00000008186	350.9667505	1.26659194	1.707865314	1.620096012	0.047467933	0.000462045	0.00107528	X30 - X0_X3 - X0_X7 - X0	spleen tyrosine kinase [Source:ZFIN;Acc:ZDB-GENE-040702-3]	10	5539534	5584889	-1	2	KNOWN	0.754939	-1.134140056	0.379201056	3	NA
ENSDARG00000008243	cct8	ENSDARG00000008243	4759.661145	1.215532966	2.158824383	1.664540981	0.010950893	9.88E-07	1.93E-05	X30 - X0_X3 - X0_X7 - X0	chaperonin containing TCP1, subunit 8 (theta) [Source:ZFIN;Acc:ZDB-GENE-040426-876]	10	25963452	25979373	-1	5	KNOWN	1.015609207	-0.983623324	-0.031985883	2	NA
ENSDARG00000008247	vezf1a	ENSDARG00000008247	1738.183853	1.49147641	2.828194188	2.477628645	0.001675075	2.04E-06	5.43E-06	X30 - X0_X3 - X0_X7 - X0	vascular endothelial zinc finger 1a [Source:ZFIN;Acc:ZDB-GENE-040108-4]	10	38416881	38465277	1	2	KNOWN	0.811483719	-1.117163415	0.305679696	3	NA
ENSDARG00000008278	rcor2	ENSDARG00000008278	242.7982448	2.448094366	3.396683866	5.18139425	8.65E-05	7.92E-06	8.66E-07	X30 - X0_X3 - X0_X7 - X0	REST corepressor 2 [Source:ZFIN;Acc:ZDB-GENE-040426-1812]	7	26146924	26161813	-1	2	KNOWN	-0.200826387	-0.884346458	1.085172845	5	NA
ENSDARG00000008287	fam114a1	ENSDARG00000008287	117.3720054	2.301140215	8.148456983	5.730474268	0.008939582	8.56E-06	4.60E-05	X30 - X0_X3 - X0_X7 - X0	family with sequence similarity 114, member A1 [Source:ZFIN;Acc:ZDB-GENE-070410-52]	1	17317642	17333963	-1	3	KNOWN	0.937683144	-1.052419108	0.114735964	2	NA
ENSDARG00000008292	eif2s3	ENSDARG00000008292	4199.059101	1.259767265	1.965053116	1.817701399	0.010136559	7.51E-06	1.91E-05	X30 - X0_X3 - X0_X7 - X0	eukaryotic translation initiation factor 2, subunit 3 gamma [Source:ZFIN;Acc:ZDB-GENE-030131-5552]	24	17532374	17552055	1	4	KNOWN	0.763953662	-1.131830885	0.367877223	3	NA
ENSDARG00000008359	cnn3a	ENSDARG00000008359	2033.204506	1.370548456	2.529552932	1.993693401	0.019062974	1.66E-05	0.000153795	X30 - X0_X3 - X0_X7 - X0	calponin 3, acidic a [Source:ZFIN;Acc:ZDB-GENE-030131-5130]	24	31349968	31374453	1	1	KNOWN	0.973976192	-1.024135918	0.050159727	2	NA
ENSDARG00000008380	brd7	ENSDARG00000008380	1066.094125	1.225204316	1.638063641	1.467952194	0.017497896	5.95E-05	0.000361026	X30 - X0_X3 - X0_X7 - X0	bromodomain containing 7 [Source:ZFIN;Acc:ZDB-GENE-040426-2687]	7	39134401	39147445	1	2	KNOWN	0.936535922	-1.053225523	0.116689601	2	NA
ENSDARG00000008388	mmp14b	ENSDARG00000008388	1270.608836	3.179212258	15.18984789	14.16919588	3.37E-05	6.97E-08	8.68E-08	X30 - X0_X3 - X0_X7 - X0	matrix metalloproteinase 14b (membrane-inserted) [Source:ZFIN;Acc:ZDB-GENE-030901-2]	2	37864076	37886399	1	1	KNOWN	0.652286162	-1.151304927	0.499018765	3	NA
ENSDARG00000008423	tfec	ENSDARG00000008423	90.74152124	3.534741185	22.03802255	17.21104651	0.003000192	8.36E-07	2.04E-06	X30 - X0_X3 - X0_X7 - X0	transcription factor EC [Source:ZFIN;Acc:ZDB-GENE-041210-21]	Zv9_scaffold3539	166184	180780	1	1	KNOWN	0.810259774	-1.117596956	0.307337181	3	NA
ENSDARG00000008480	trmt61a	ENSDARG00000008480	138.2215538	1.69226853	3.801701746	2.708554477	0.000453428	3.64E-07	3.35E-06	X30 - X0_X3 - X0_X7 - X0	tRNA methyltransferase 61 homolog A (S. cerevisiae) [Source:ZFIN;Acc:ZDB-GENE-040718-5]	13	15655824	15704078	1	3	KNOWN	1.011921763	-0.987635833	-0.02428593	2	NA
ENSDARG00000008494	myl6	ENSDARG00000008494	1567.452941	1.269051115	2.731845288	1.738652303	0.023544567	1.64E-06	0.000128763	X30 - X0_X3 - X0_X7 - X0	myosin, light chain 6, alkali, smooth muscle and non-muscle [Source:ZFIN;Acc:ZDB-GENE-041010-28]	6	39805041	39824390	-1	6	KNOWN	1.096151263	-0.862462823	-0.233688441	2	NA
ENSDARG00000008540	sox21b	ENSDARG00000008540	13.79445099	3.489753067	35.00202188	16.16928833	0.013068967	2.76E-06	3.98E-05	X30 - X0_X3 - X0_X7 - X0	SRY-box containing gene 21 b [Source:ZFIN;Acc:ZDB-GENE-040429-1]	9	55102198	55103535	1	1	KNOWN	1.058383443	-0.929027144	-0.129356299	2	NA
ENSDARG00000008551	pole3	ENSDARG00000008551	639.6712294	1.307885601	2.090594533	1.546686177	0.008639819	8.90E-06	0.000389159	X30 - X0_X3 - X0_X7 - X0	polymerase (DNA directed), epsilon 3 (p17 subunit) [Source:ZFIN;Acc:ZDB-GENE-040426-1773]	5	34506017	34508705	-1	1	KNOWN	1.102363802	-0.848831924	-0.253531878	2	NA
ENSDARG00000008732	zgc:66479	ENSDARG00000008732	72.07970514	2.485119431	4.738342459	4.167590102	0.000477533	6.36E-06	1.33E-05	X30 - X0_X3 - X0_X7 - X0	zgc:66479 [Source:ZFIN;Acc:ZDB-GENE-031030-10]	6	46673428	46679555	-1	1	KNOWN	0.803569722	-1.119912131	0.316342409	3	NA
ENSDARG00000008790	actr3b	ENSDARG00000008790	458.5647369	-1.498815289	-2.668368936	-1.619578348	0.014172667	5.53E-05	0.005121819	X30 - X0_X3 - X0_X7 - X0	ARP3 actin-related protein 3 homolog B (yeast) [Source:ZFIN;Acc:ZDB-GENE-070424-10]	24	7404891	7435323	-1	2	KNOWN	-1.149601517	0.668674419	0.480927098	6	NA
ENSDARG00000008803	marcksb	ENSDARG00000008803	4136.008723	3.221762286	6.883874293	5.998864543	3.04E-06	9.28E-08	1.53E-07	X30 - X0_X3 - X0_X7 - X0	myristoylated alanine rich protein kinase C substrate b [Source:ZFIN;Acc:ZDB-GENE-030131-1921]	17	15376740	15379440	1	2	KNOWN	0.793237851	-1.123310252	0.330072401	3	Yes
ENSDARG00000008805	orc3	ENSDARG00000008805	194.5154723	1.792422842	6.926573574	4.111416196	0.002608939	3.38E-07	3.72E-06	X30 - X0_X3 - X0_X7 - X0	origin recognition complex, subunit 3 [Source:ZFIN;Acc:ZDB-GENE-030131-6247]	17	49469447	49495618	-1	2	KNOWN	1.030610367	-0.96628379	-0.064326578	2	NA
ENSDARG00000008811	cmtm3	ENSDARG00000008811	152.5415652	2.558061332	8.69016179	7.589314978	0.003258373	4.87E-06	8.86E-06	X30 - X0_X3 - X0_X7 - X0	CKLF-like MARVEL transmembrane domain containing 3 [Source:ZFIN;Acc:ZDB-GENE-040801-206]	7	45596171	45609228	1	2	KNOWN	0.737472296	-1.138217116	0.40074482	3	NA
ENSDARG00000008816	glud1a	ENSDARG00000008816	682.1525446	1.832659459	6.042550992	5.418432627	0.000655839	2.49E-07	4.01E-07	X30 - X0_X3 - X0_X7 - X0	glutamate dehydrogenase 1a [Source:ZFIN;Acc:ZDB-GENE-030114-2]	13	22819296	22839236	-1	1	KNOWN	0.709231375	-1.14375645	0.434525074	3	NA
ENSDARG00000008886	msxb	ENSDARG00000008886	31.14894227	4.043326293	15.43563868	19.39545376	0.037111299	0.000227991	0.000128169	X30 - X0_X3 - X0_X7 - X0	muscle segment homeobox B [Source:ZFIN;Acc:ZDB-GENE-980526-26]	1	49859299	49861712	1	1	KNOWN	0.31084194	-1.118506099	0.807664159	4	NA
ENSDARG00000008904	smarca2	ENSDARG00000008904	1638.352286	-1.189485506	-1.312664073	-1.280581841	0.024009911	0.001892396	0.003485152	X30 - X0_X3 - X0_X7 - X0	SWI/SNF related, matrix associated, actin dependent regulator of chromatin, subfamily a, member 2 [Source:ZFIN;Acc:ZDB-GENE-030131-5964]	5	46757516	46902718	1	3	KNOWN	-0.809890509	1.117727144	-0.307836635	1	NA
ENSDARG00000008937	neo1	ENSDARG00000008937	258.9268738	1.361921655	1.704080608	1.500411026	0.021830341	0.000908328	0.00532415	X30 - X0_X3 - X0_X7 - X0	neogenin 1 [Source:ZFIN;Acc:ZDB-GENE-021031-1]	7	55234835	55569461	-1	3	KNOWN	1.057124501	-0.930887792	-0.126236709	2	NA
ENSDARG00000008986	e2f7	ENSDARG00000008986	96.95391742	1.779810776	5.079958434	3.305042148	0.002092936	5.96E-07	6.98E-06	X30 - X0_X3 - X0_X7 - X0	E2F transcription factor 7 [Source:ZFIN;Acc:ZDB-GENE-030131-3527]	4	2401851	2416355	-1	3	KNOWN	1.024242867	-0.973851779	-0.050391088	2	NA
ENSDARG00000009001	pdip5	ENSDARG00000009001	1617.713535	1.363190076	4.067823819	2.108085387	0.032308114	1.35E-06	0.000134566	X30 - X0_X3 - X0_X7 - X0	protein disulfide isomerase-related protein (provisional) [Source:ZFIN;Acc:ZDB-GENE-030131-879]	20	31243403	31257030	1	2	KNOWN	1.112910091	-0.823050895	-0.289859196	2	NA
ENSDARG00000009014	col11a1b	ENSDARG00000009014	276.0104025	4.014149463	6.859190845	14.74637129	0.001014066	7.14E-05	5.40E-06	X30 - X0_X3 - X0_X7 - X0	collagen, type XI, alpha 1b [Source:ZFIN;Acc:ZDB-GENE-070912-607]	2	15210524	15383469	-1	4	KNOWN	-0.302285813	-0.813982715	1.116268528	5	NA
ENSDARG00000009040	zgc:73324	ENSDARG00000009040	5135.413951	-1.474485841	-3.031238829	-2.80710495	0.014606085	1.40E-05	2.23E-05	X30 - X0_X3 - X0_X7 - X0	zgc:73324 [Source:ZFIN;Acc:ZDB-GENE-040426-1760]	3	17752918	17759735	-1	1	KNOWN	-0.705370364	1.144417136	-0.439046772	1	NA
ENSDARG00000009087	cd74a	ENSDARG00000009087	3850.79013	4.336484102	2.018453845	4.461591788	2.17E-07	4.20E-05	1.98E-07	X30 - X0_X3 - X0_X7 - X0	CD74 molecule, major histocompatibility complex, class II invariant chain a [Source:ZFIN;Acc:ZDB-GENE-000901-1]	14	3122605	3136493	-1	3	KNOWN	-1.153506475	0.531287759	0.622218715	6	NA
ENSDARG00000009106	serinc1	ENSDARG00000009106	29547.86765	-1.226139226	-1.924135999	-1.692527413	0.039421806	2.97E-05	0.000142745	X30 - X0_X3 - X0_X7 - X0	serine incorporator 1 [Source:ZFIN;Acc:ZDB-GENE-030131-4415]	20	40489330	40504250	1	3	KNOWN	-0.871596119	1.091725002	-0.220128883	1	NA
ENSDARG00000009212	ppiaa	ENSDARG00000009212	15914.94528	1.704064821	4.084820359	3.393353246	0.000314883	2.97E-07	8.58E-07	X30 - X0_X3 - X0_X7 - X0	peptidylprolyl isomerase Aa (cyclophilin A) [Source:ZFIN;Acc:ZDB-GENE-030131-8556]	8	47908734	47913950	-1	4	KNOWN	0.836161501	-1.107736794	0.271575293	3	NA
ENSDARG00000009285	rpl15	ENSDARG00000009285	8568.359591	1.555513928	3.332437596	2.675940887	0.001537408	1.26E-06	5.57E-06	X30 - X0_X3 - X0_X7 - X0	ribosomal protein L15 [Source:ZFIN;Acc:ZDB-GENE-040801-183]	19	19373861	19381684	1	5	KNOWN	0.902772476	-1.07488555	0.172113074	3	NA
ENSDARG00000009313	NAPSA	ENSDARG00000009313	595.4841309	2.619800333	11.25004623	8.864728584	0.000203772	2.01E-07	4.43E-07	X30 - X0_X3 - X0_X7 - X0	napsin A aspartic peptidase [Source:HGNC Symbol;Acc:13395]	3	25222423	25234511	1	2	KNOWN_BY_PROJECTION	0.823905869	-1.112584321	0.288678452	3	NA
ENSDARG00000009401	vcanb	ENSDARG00000009401	200.9314042	1.926612829	1.686008877	2.283693652	0.0015175	0.006363092	0.000295704	X30 - X0_X3 - X0_X7 - X0	versican b [Source:ZFIN;Acc:ZDB-GENE-030131-2185]	10	44667336	44740992	1	2	KNOWN	-0.929177042	-0.129105439	1.058282481	8	NA
ENSDARG00000009430	tmem30c	ENSDARG00000009430	16.56037989	4.708174963	31.0004451	30.53289951	0.003952307	7.52E-06	8.51E-06	X30 - X0_X3 - X0_X7 - X0	transmembrane protein 30C [Source:ZFIN;Acc:ZDB-GENE-040426-1127]	9	31027747	31040785	1	1	KNOWN	0.59281707	-1.154561168	0.561744098	4	NA
ENSDARG00000009477	prkar2ab	ENSDARG00000009477	1003.519874	-1.284336047	-2.512035172	-1.956555909	0.041009791	1.18E-05	0.000111454	X30 - X0_X3 - X0_X7 - X0	protein kinase, cAMP-dependent, regulatory, type II, alpha, B [Source:ZFIN;Acc:ZDB-GENE-040426-2427]	22	182815	203359	-1	2	KNOWN	-0.966847761	1.030145066	-0.063297305	1	NA
ENSDARG00000009482	SLC38A8 (2 of 2)	ENSDARG00000009482	53.31205639	2.835239092	6.060640156	6.18051273	0.041681195	0.000784186	0.000758767	X30 - X0_X3 - X0_X7 - X0	solute carrier family 38, member 8 [Source:HGNC Symbol;Acc:32434]	18	21403125	21420946	-1	1	KNOWN_BY_PROJECTION	0.545479218	-1.154124495	0.608645277	4	NA
ENSDARG00000009484	arf1	ENSDARG00000009484	1793.354357	1.485820186	3.839393875	2.839750594	0.001145901	1.92E-07	1.18E-06	X30 - X0_X3 - X0_X7 - X0	ADP-ribosylation factor 1 [Source:ZFIN;Acc:ZDB-GENE-010724-5]	2	3463796	3476115	-1	2	KNOWN	0.946255881	-1.046233389	0.099977508	2	NA
ENSDARG00000009610	rgs12a	ENSDARG00000009610	258.4814394	1.953654517	2.221911429	3.848011194	3.76E-05	9.80E-06	2.05E-07	X30 - X0_X3 - X0_X7 - X0	regulator of G-protein signaling 12a [Source:ZFIN;Acc:ZDB-GENE-030131-2614]	7	19689263	19760087	-1	1	KNOWN	-0.441539911	-0.703233227	1.144773137	5	NA
ENSDARG00000009653	lhfpl2a	ENSDARG00000009653	33.373743	4.750569965	20.15856499	10.75075467	0.000677082	8.85E-07	1.16E-05	X30 - X0_X3 - X0_X7 - X0	lipoma HMGIC fusion partner-like 2a [Source:ZFIN;Acc:ZDB-GENE-040426-1839]	21	338312	362880	-1	3	KNOWN	1.065072569	-0.91882027	-0.146252298	2	NA
ENSDARG00000009702	BX088691.1	ENSDARG00000009702	153.9276728	3.39178553	5.979508821	6.043563999	0.000992098	3.65E-05	3.65E-05	X30 - X0_X3 - X0_X7 - X0	Uncharacterized protein [Source:UniProtKB/TrEMBL;Acc:E7F965]	7	51153042	51174182	1	1	KNOWN	0.55605055	-1.154441751	0.598391201	4	NA
ENSDARG00000009727	twf2b	ENSDARG00000009727	21.89071872	2.009931596	3.381744693	2.470179447	0.017440591	0.000262129	0.002738543	X30 - X0_X3 - X0_X7 - X0	twinfilin, actin-binding protein, homolog 2b (Drosophila) [Source:ZFIN;Acc:ZDB-GENE-050522-238]	11	18465653	18480950	-1	2	KNOWN	1.090172604	-0.874696329	-0.215476275	2	NA
ENSDARG00000009822	her4.4	ENSDARG00000009822	27.01865391	3.631214016	4.154386769	6.680901513	0.005322978	0.003103073	0.00026812	X30 - X0_X3 - X0_X7 - X0	hairy-related 4, tandem duplicate 4 [Source:ZFIN;Acc:ZDB-GENE-081031-104]	23	21756163	21757930	-1	1	KNOWN	-0.409473636	-0.730275752	1.139749388	5	NA
ENSDARG00000009870	mapk8b	ENSDARG00000009870	643.3639969	-1.329445049	-2.015704731	-1.481024461	0.023524951	8.64E-05	0.003927117	X30 - X0_X3 - X0_X7 - X0	mitogen-activated protein kinase 8b [Source:ZFIN;Acc:ZDB-GENE-010202-1]	12	2770278	2787246	-1	4	KNOWN	-1.128895685	0.774676049	0.354219636	6	NA
ENSDARG00000009871	snrpc	ENSDARG00000009871	626.9360383	1.313807806	2.543521436	1.923837638	0.004927024	9.08E-07	1.18E-05	X30 - X0_X3 - X0_X7 - X0	small nuclear ribonucleoprotein polypeptide C [Source:ZFIN;Acc:ZDB-GENE-020419-26]	6	54385571	54391060	-1	2	KNOWN	1.002606562	-0.997372895	-0.005233667	2	NA
ENSDARG00000009885	sult3st1	ENSDARG00000009885	65.57316465	1.619134538	3.153487079	3.484592104	0.04386654	0.000127183	6.99E-05	X30 - X0_X3 - X0_X7 - X0	sulfotransferase family 3, cytosolic sulfotransferase 1 [Source:ZFIN;Acc:ZDB-GENE-061207-52]	3	29804476	29822772	-1	2	KNOWN	0.402974202	-1.138615077	0.735640876	4	NA
ENSDARG00000009933	lmnb2	ENSDARG00000009933	1065.411071	1.362877805	2.81139573	2.38264655	0.018036796	5.96E-06	2.14E-05	X30 - X0_X3 - X0_X7 - X0	lamin B2 [Source:ZFIN;Acc:ZDB-GENE-990630-13]	22	1189220	1220491	-1	2	KNOWN	0.840975513	-1.105739637	0.264764125	3	NA
ENSDARG00000009939	micu2	ENSDARG00000009939	171.023103	1.692476308	4.955935082	3.821089435	0.015245734	5.47E-06	2.34E-05	X30 - X0_X3 - X0_X7 - X0	mitochondrial calcium uptake 2 [Source:ZFIN;Acc:ZDB-GENE-030131-3374]	5	38199270	38209863	1	4	KNOWN	0.884923286	-1.084865786	0.1999425	3	NA
ENSDARG00000009942	cdc6	ENSDARG00000009942	111.1788505	3.364570076	15.28818647	9.199185969	0.000180658	1.69E-07	9.57E-07	X30 - X0_X3 - X0_X7 - X0	cell division cycle 6 homolog (S. cerevisiae) [Source:ZFIN;Acc:ZDB-GENE-050506-131]	11	11904847	11914072	-1	1	KNOWN	1.007035115	-0.992813182	-0.014221933	2	NA
ENSDARG00000009965	mag	ENSDARG00000009965	1074.954113	1.543821705	1.964643346	2.089515221	0.030101613	0.002515922	0.001803853	X30 - X0_X3 - X0_X7 - X0	myelin associated glycoprotein [Source:ZFIN;Acc:ZDB-GENE-041217-24]	15	31940736	31982718	1	4	KNOWN	0.34503905	-1.12683134	0.78179229	4	NA
ENSDARG00000009978	icn	ENSDARG00000009978	2345.863054	2.202976046	6.218467574	4.775562443	0.000115715	2.55E-07	8.56E-07	X30 - X0_X3 - X0_X7 - X0	ictacalcin [Source:ZFIN;Acc:ZDB-GENE-030131-8599]	16	25670482	25671845	1	1	KNOWN	0.894500393	-1.079628078	0.185127685	3	NA
ENSDARG00000010008	vim	ENSDARG00000010008	3263.40612	1.940761706	3.601121521	3.574689342	0.000362872	3.00E-06	3.24E-06	X30 - X0_X3 - X0_X7 - X0	vimentin [Source:ZFIN;Acc:ZDB-GENE-011212-3]	24	33381675	33398129	1	1	KNOWN	0.591190535	-1.154589047	0.563398512	4	NA
ENSDARG00000010032	cmtm7	ENSDARG00000010032	112.6260014	2.026457344	7.244297291	5.667215741	0.016532457	8.07E-06	2.48E-05	X30 - X0_X3 - X0_X7 - X0	CKLF-like MARVEL transmembrane domain containing 7 [Source:ZFIN;Acc:ZDB-GENE-041111-174]	16	44265130	44273385	-1	1	KNOWN	0.846380068	-1.103433068	0.257052999	3	NA
ENSDARG00000010059	itpkb	ENSDARG00000010059	61.61291472	3.274887143	7.347926023	6.622001673	0.001304571	1.57E-05	2.72E-05	X30 - X0_X3 - X0_X7 - X0	inositol-trisphosphate 3-kinase B [Source:ZFIN;Acc:ZDB-GENE-041014-166]	20	38406775	38474612	-1	2	KNOWN	0.736303385	-1.138471752	0.402168367	3	NA
ENSDARG00000010075	PTCHD3 (2 of 3)	ENSDARG00000010075	243.7663766	-1.314439388	-1.626404974	-1.531295734	0.040076467	0.002041062	0.003986084	X30 - X0_X3 - X0_X7 - X0	patched domain containing 3 [Source:HGNC Symbol;Acc:24776]	24	33766257	33773233	-1	1	KNOWN_BY_PROJECTION	-0.84863914	1.102448398	-0.253809258	1	NA
ENSDARG00000010144	lppr3a	ENSDARG00000010144	405.1259342	2.19524891	4.729865473	4.782288276	0.007693296	7.61E-05	7.21E-05	X30 - X0_X3 - X0_X7 - X0	lipid phosphate phosphatase-related protein type 3a [Source:ZFIN;Acc:ZDB-GENE-070912-555]	2	26327266	26356309	1	1	KNOWN	0.559533908	-1.154519121	0.594985213	4	NA
ENSDARG00000010154	vstm4a	ENSDARG00000010154	10.26425569	3.820872839	6.233421796	11.16746162	0.04049606	0.007116451	0.000509017	X30 - X0_X3 - X0_X7 - X0	V-set and transmembrane domain containing 4a [Source:ZFIN;Acc:ZDB-GENE-060810-69]	13	31174757	31191386	1	2	KNOWN	-0.224448624	-0.868702348	1.093150971	5	NA
ENSDARG00000010160	rps15a	ENSDARG00000010160	5878.231501	1.509697542	3.137176428	2.614249419	0.00099489	6.78E-07	2.35E-06	X30 - X0_X3 - X0_X7 - X0	ribosomal protein S15a [Source:ZFIN;Acc:ZDB-GENE-030131-8708]	3	26666187	26672111	-1	2	KNOWN	0.862701572	-1.096038305	0.233336734	3	NA
ENSDARG00000010244	rpl22l1	ENSDARG00000010244	1893.858206	1.645302152	4.330448283	3.158410775	0.001504829	6.53E-07	3.76E-06	X30 - X0_X3 - X0_X7 - X0	ribosomal protein L22-like 1 [Source:ZFIN;Acc:ZDB-GENE-060804-3]	24	27271784	27276547	-1	4	KNOWN	0.955094645	-1.039548803	0.084454158	2	NA
ENSDARG00000010252	jak3	ENSDARG00000010252	94.846713	4.066728317	14.9951425	11.41096802	0.001238174	3.16E-06	9.55E-06	X30 - X0_X3 - X0_X7 - X0	Janus kinase 3 (a protein tyrosine kinase, leukocyte) [Source:ZFIN;Acc:ZDB-GENE-070725-4]	8	13906066	13929548	1	2	KNOWN	0.868345635	-1.093325223	0.224979588	3	NA
ENSDARG00000010255	bin2b	ENSDARG00000010255	272.9047559	1.799473926	8.296590935	5.047670155	0.029499504	4.18E-06	3.67E-05	X30 - X0_X3 - X0_X7 - X0	bridging integrator 2b [Source:ZFIN;Acc:ZDB-GENE-030131-5598]	6	38811030	38824363	1	4	KNOWN	1.000037171	-0.999962825	-7.43E-05	2	NA
ENSDARG00000010316	qars	ENSDARG00000010316	639.9838267	1.383070405	3.289409491	2.121054183	0.007975964	1.02E-06	3.10E-05	X30 - X0_X3 - X0_X7 - X0	glutaminyl-tRNA synthetase [Source:ZFIN;Acc:ZDB-GENE-040426-1011]	8	48507066	48539930	-1	5	KNOWN	1.066233776	-0.916990761	-0.149243015	2	NA
ENSDARG00000010317	gpr183	ENSDARG00000010317	148.2484614	3.051789711	10.46426276	8.233544001	0.000231361	4.80E-07	1.23E-06	X30 - X0_X3 - X0_X7 - X0	G protein-coupled receptor 183 [Source:ZFIN;Acc:ZDB-GENE-070615-28]	9	32138697	32141593	-1	1	KNOWN	0.8452531	-1.10391973	0.25866663	3	NA
ENSDARG00000010384	lpar5a	ENSDARG00000010384	48.050765	4.817399589	17.19638362	12.79662149	0.000718775	1.88E-06	5.99E-06	X30 - X0_X3 - X0_X7 - X0	lysophosphatidic acid receptor 5a [Source:ZFIN;Acc:ZDB-GENE-030131-1193]	2	48396762	48398332	1	1	KNOWN	0.891279783	-1.081419147	0.190139364	3	NA
ENSDARG00000010407	ppp4r4	ENSDARG00000010407	342.619312	-1.569730087	-2.701030787	-2.07713127	0.022444762	0.000178147	0.001388595	X30 - X0_X3 - X0_X7 - X0	protein phosphatase 4, regulatory subunit 4 [Source:ZFIN;Acc:ZDB-GENE-041001-164]	20	27360495	27402057	1	2	KNOWN	-1.032502556	0.963972011	0.068530545	6	NA
ENSDARG00000010432	eaf2	ENSDARG00000010432	441.2352053	1.273782697	2.136531154	1.640874942	0.032748881	2.49E-05	0.000532319	X30 - X0_X3 - X0_X7 - X0	ELL associated factor 2 [Source:ZFIN;Acc:ZDB-GENE-040625-179]	9	24036553	24041286	1	4	KNOWN	1.045808848	-0.946829996	-0.098978852	2	NA
ENSDARG00000010482	prg4a	ENSDARG00000010482	65.50779581	3.541567502	4.555821638	6.45346841	0.009160153	0.003036274	0.00076202	X30 - X0_X3 - X0_X7 - X0	proteoglycan 4a [Source:ZFIN;Acc:ZDB-GENE-030131-8295]	2	20566497	20584574	1	3	KNOWN	-0.199216053	-0.885396909	1.084612962	5	NA
ENSDARG00000010487	sae1	ENSDARG00000010487	637.8111543	1.452403081	3.258944531	2.503416087	0.003589623	1.20E-06	7.51E-06	X30 - X0_X3 - X0_X7 - X0	SUMO1 activating enzyme subunit 1 [Source:ZFIN;Acc:ZDB-GENE-040625-21]	15	23076168	23092652	1	1	KNOWN	0.941291018	-1.049850494	0.108559476	2	NA
ENSDARG00000010511	prc1a	ENSDARG00000010511	185.1201239	2.502405877	8.66189107	4.558562283	1.68E-05	2.82E-08	3.28E-07	X30 - X0_X3 - X0_X7 - X0	protein regulator of cytokinesis 1a [Source:ZFIN;Acc:ZDB-GENE-020801-3]	Zv9_NA363	2498	24251	-1	2	KNOWN	1.090884658	-0.8732807	-0.217603958	2	NA
ENSDARG00000010516	rpl21	ENSDARG00000010516	8718.152861	1.352630712	2.686111612	2.144370928	0.00404735	1.07E-06	6.97E-06	X30 - X0_X3 - X0_X7 - X0	ribosomal protein L21 [Source:ZFIN;Acc:ZDB-GENE-030131-8512]	24	22229602	22233473	1	1	KNOWN	0.932062856	-1.056322986	0.12426013	2	NA
ENSDARG00000010531	scamp4	ENSDARG00000010531	683.5227994	1.530456786	5.772690312	3.979693455	0.009139908	3.86E-07	2.28E-06	X30 - X0_X3 - X0_X7 - X0	secretory carrier membrane protein 4 [Source:ZFIN;Acc:ZDB-GENE-050913-40]	22	22666000	22678709	1	2	KNOWN	0.944675842	-1.047395019	0.102719177	2	NA
ENSDARG00000010556	CABZ01030094.1	ENSDARG00000010556	37.83342614	10.07325878	92.4272672	48.83317858	0.00112746	1.10E-06	6.11E-06	X30 - X0_X3 - X0_X7 - X0	Uncharacterized protein [Source:UniProtKB/TrEMBL;Acc:E7F1N5]	12	4941294	4958844	1	1	KNOWN	1.018981608	-0.979870822	-0.039110786	2	NA
ENSDARG00000010571	ezh2	ENSDARG00000010571	381.7655752	2.251756388	5.941380228	4.167326211	4.33E-05	1.25E-07	6.25E-07	X30 - X0_X3 - X0_X7 - X0	enhancer of zeste homolog 2 (Drosophila) [Source:ZFIN;Acc:ZDB-GENE-041111-259]	24	17894626	17913559	1	1	KNOWN	0.986973013	-1.012536797	0.025563784	2	NA
ENSDARG00000010591	foxn4	ENSDARG00000010591	380.9560961	8.934606963	19.63296226	21.33567407	8.85E-07	7.75E-08	6.49E-08	X30 - X0_X3 - X0_X7 - X0	forkhead box N4 [Source:ZFIN;Acc:ZDB-GENE-990415-277]	5	21168831	21183494	-1	3	KNOWN	0.446056025	-1.145402945	0.69934692	4	Yes
ENSDARG00000010619	themis	ENSDARG00000010619	15.31913617	5.121855904	3.199197506	5.077529261	0.003816683	0.035009507	0.003942619	X30 - X0_X3 - X0_X7 - X0	thymocyte selection associated [Source:ZFIN;Acc:ZDB-GENE-041008-160]	20	1446501	1462565	-1	1	KNOWN	-1.154465053	0.597427354	0.557037699	6	NA
ENSDARG00000010625	clic2	ENSDARG00000010625	635.7869059	3.178910058	9.713145776	8.083396873	0.000437363	2.54E-06	5.36E-06	X30 - X0_X3 - X0_X7 - X0	chloride intracellular channel 2 [Source:ZFIN;Acc:ZDB-GENE-040718-299]	14	34891740	34901028	-1	1	KNOWN	0.800123589	-1.121069202	0.320945613	3	NA
ENSDARG00000010654	ARHGAP42 (1 of 2)	ENSDARG00000010654	48.58746931	1.565444508	3.522187851	2.654473526	0.009833612	4.69E-06	3.79E-05	X30 - X0_X3 - X0_X7 - X0	Rho GTPase activating protein 42 [Source:HGNC Symbol;Acc:26545]	18	40247219	40463254	-1	1	KNOWN_BY_PROJECTION	0.960253654	-1.035495795	0.075242141	2	NA
ENSDARG00000010657	irak4	ENSDARG00000010657	78.12953728	1.604175808	4.086094582	3.260332462	0.014434585	4.87E-06	2.31E-05	X30 - X0_X3 - X0_X7 - X0	interleukin-1 receptor-associated kinase 4 [Source:ZFIN;Acc:ZDB-GENE-040426-738]	25	878660	887528	-1	2	KNOWN	0.872347755	-1.091350988	0.219003232	3	NA
ENSDARG00000010717	chchd10	ENSDARG00000010717	5470.234905	-1.274257797	-2.016817644	-2.22524568	0.035778059	5.43E-05	2.02E-05	X30 - X0_X3 - X0_X7 - X0	coiled-coil-helix-coiled-coil-helix domain containing 10 [Source:ZFIN;Acc:ZDB-GENE-040426-1753]	21	13907624	13911694	1	2	KNOWN	-0.356181048	1.129327243	-0.773146195	1	NA
ENSDARG00000010728	scin	ENSDARG00000010728	28.95905047	7.020308812	8.072106176	18.42175696	0.006190927	0.0038962	0.000137174	X30 - X0_X3 - X0_X7 - X0	scinderin [Source:ZFIN;Acc:ZDB-GENE-060503-6]	19	32593073	32618294	-1	1	KNOWN	-0.491872912	-0.658798742	1.150671654	5	NA
ENSDARG00000010729	CABZ01073795.1	ENSDARG00000010729	186.9829051	58.65785972	16.65744568	58.24590835	6.46E-06	0.000226871	5.56E-06	X30 - X0_X3 - X0_X7 - X0	Uncharacterized protein [Source:UniProtKB/TrEMBL;Acc:F1R223]	10	4452092	4455744	1	1	KNOWN	-1.154658472	0.585864998	0.568793475	6	NA
ENSDARG00000010752	acsl4l	ENSDARG00000010752	439.9372353	1.619278052	4.973448526	2.835883297	0.011890612	2.68E-06	7.11E-05	X30 - X0_X3 - X0_X7 - X0	acyl-CoA synthetase long-chain family member 4, like [Source:ZFIN;Acc:ZDB-GENE-030131-6493]	5	25187334	25243169	-1	1	KNOWN	1.078062144	-0.897271926	-0.180790218	2	NA
ENSDARG00000010782	zgc:55621	ENSDARG00000010782	15.07214343	4.057693177	3.897052908	5.22199278	0.025642476	0.025742573	0.008042277	X30 - X0_X3 - X0_X7 - X0	zgc:55621 [Source:ZFIN;Acc:ZDB-GENE-040426-762]	15	34243715	34257043	1	1	KNOWN	-0.684861219	-0.46269288	1.147554099	5	NA
ENSDARG00000010783	scn1a	ENSDARG00000010783	17.69326101	-1.652251526	-2.674661813	-1.838503322	0.044971754	0.002092961	0.022971211	X30 - X0_X3 - X0_X7 - X0	sodium channel, voltage-gated, type I, alpha [Source:ZFIN;Acc:ZDB-GENE-040426-751]	9	50902616	50972365	1	2	KNOWN	-1.137689765	0.73986096	0.397828805	6	NA
ENSDARG00000010784	ppp1r12a	ENSDARG00000010784	1402.497628	-1.251826392	-1.255877167	-1.39688975	0.026308746	0.023796925	0.003205354	X30 - X0_X3 - X0_X7 - X0	protein phosphatase 1, regulatory (inhibitor) subunit 12A [Source:ZFIN;Acc:ZDB-GENE-041011-3]	4	20424680	20519848	-1	4	KNOWN	0.552658608	0.601694811	-1.154353419	7	NA
ENSDARG00000010791	dla	ENSDARG00000010791	174.3996011	7.177385341	19.62751551	13.92679355	5.58E-06	1.64E-07	4.43E-07	X30 - X0_X3 - X0_X7 - X0	deltaA [Source:ZFIN;Acc:ZDB-GENE-980526-29]	1	54580211	54592934	1	3	KNOWN	0.970775777	-1.026863458	0.056087681	2	NA
ENSDARG00000010792	cdc25	ENSDARG00000010792	231.0939348	2.62719182	8.382588319	6.673980121	0.00084918	2.18E-06	5.29E-06	X30 - X0_X3 - X0_X7 - X0	cell division cycle 25 homolog [Source:ZFIN;Acc:ZDB-GENE-000330-5]	13	14776347	14790249	-1	3	KNOWN	0.84173619	-1.105419145	0.263682955	3	NA
ENSDARG00000010816	slc7a14a	ENSDARG00000010816	1683.422707	-1.266328102	-1.919794359	-1.637927871	0.047141736	0.000120187	0.000822179	X30 - X0_X3 - X0_X7 - X0	solute carrier family 7 (cationic amino acid transporter, y+ system), member 14a [Source:ZFIN;Acc:ZDB-GENE-070912-112]	2	26016574	26139598	1	3	KNOWN	-0.951242195	1.042501786	-0.09125959	1	NA
ENSDARG00000010862	amt	ENSDARG00000010862	158.6444956	1.298632231	1.914498764	1.638890926	0.022769128	5.85E-05	0.000434616	X30 - X0_X3 - X0_X7 - X0	aminomethyltransferase [Source:ZFIN;Acc:ZDB-GENE-041010-114]	8	27249495	27261613	1	2	KNOWN	0.963240683	-1.033096125	0.069855441	2	NA
ENSDARG00000010878	cdkn1c	ENSDARG00000010878	82.84290562	2.629660936	3.767815003	6.278777752	0.00445156	0.000394743	2.94E-05	X30 - X0_X3 - X0_X7 - X0	cyclin-dependent kinase inhibitor 1C [Source:ZFIN;Acc:ZDB-GENE-040123-1]	7	50120652	50124044	-1	1	KNOWN	-0.245087467	-0.854671238	1.099758705	5	NA
ENSDARG00000010948	kif11	ENSDARG00000010948	380.8142775	12.6601106	58.26299109	39.28065885	5.20E-07	1.48E-08	2.57E-08	X30 - X0_X3 - X0_X7 - X0	kinesin family member 11 [Source:ZFIN;Acc:ZDB-GENE-020426-1]	17	19311202	19327159	1	2	KNOWN	0.939784674	-1.050928975	0.111144301	2	Yes
ENSDARG00000010962	fkbp7	ENSDARG00000010962	66.83611647	4.634187638	21.92136779	18.29942304	0.008496989	1.14E-05	2.35E-05	X30 - X0_X3 - X0_X7 - X0	FK506 binding protein 7 [Source:ZFIN;Acc:ZDB-GENE-030616-182]	9	43801312	43803744	-1	4	KNOWN	0.764484905	-1.131690331	0.367205425	3	NA
ENSDARG00000011042	pgbd5	ENSDARG00000011042	240.6461675	-1.251841076	-1.303757831	-1.413661299	0.04999886	0.02653791	0.006481967	X30 - X0_X3 - X0_X7 - X0	piggyBac transposable element derived 5 [Source:ZFIN;Acc:ZDB-GENE-040724-229]	13	24246853	24280165	1	1	KNOWN	0.233939407	0.862292399	-1.096231806	7	NA
ENSDARG00000011065	camk2b1	ENSDARG00000011065	1801.857663	-1.209348695	-2.017584613	-1.642307603	0.036853244	9.52E-06	0.000114965	X30 - X0_X3 - X0_X7 - X0	calcium/calmodulin-dependent protein kinase (CaM kinase) II beta 1 [Source:ZFIN;Acc:ZDB-GENE-030131-9588]	5	22717254	22814264	-1	3	KNOWN	-0.975383141	1.022921237	-0.047538096	1	NA
ENSDARG00000011079	wdr3	ENSDARG00000011079	754.6956563	1.331451387	3.19958958	2.115559389	0.003782302	2.01E-07	4.63E-06	X30 - X0_X3 - X0_X7 - X0	WD repeat domain 3 [Source:ZFIN;Acc:ZDB-GENE-030131-9830]	9	21887239	21905910	1	5	KNOWN	1.04901857	-0.942444722	-0.106573848	2	NA
ENSDARG00000011083	CR848836.1	ENSDARG00000011083	5.927890153	2.71214216	4.51024746	3.892134367	0.016716817	0.000748224	0.001882265	X30 - X0_X3 - X0_X7 - X0	Uncharacterized protein [Source:UniProtKB/TrEMBL;Acc:F1QQ77]	15	36494534	36495645	-1	1	NOVEL	0.881605973	-1.08661889	0.205012918	3	NA
ENSDARG00000011094	ccna2	ENSDARG00000011094	141.2816375	23.29335552	148.0767128	72.21195306	1.13E-07	2.09E-09	7.06E-09	X30 - X0_X3 - X0_X7 - X0	cyclin A2 [Source:ZFIN;Acc:ZDB-GENE-020418-1]	14	49305384	49309673	-1	1	KNOWN	1.063745701	-0.920889319	-0.142856383	2	Yes
ENSDARG00000011113	chrna10	ENSDARG00000011113	497.1329424	-1.38367072	-1.774001872	-1.771854941	0.010669307	0.000320041	0.000313399	X30 - X0_X3 - X0_X7 - X0	cholinergic receptor, nicotinic, alpha 10 [Source:ZFIN;Acc:ZDB-GENE-060503-725]	15	36878315	36891794	-1	2	KNOWN	-0.582120148	1.154687366	-0.572567218	1	NA
ENSDARG00000011125	snrpb	ENSDARG00000011125	1718.083338	1.219734619	2.220476843	1.60887255	0.011239292	8.77E-07	3.58E-05	X30 - X0_X3 - X0_X7 - X0	small nuclear ribonucleoprotein polypeptides B and B1 [Source:ZFIN;Acc:ZDB-GENE-040426-1819]	6	57428413	57435485	-1	1	KNOWN	1.06536164	-0.918366484	-0.146995156	2	NA
ENSDARG00000011133	ccne1	ENSDARG00000011133	55.98448479	3.423387201	16.97052418	10.85580614	0.004515777	1.75E-06	1.05E-05	X30 - X0_X3 - X0_X7 - X0	cyclin E1 [Source:ZFIN;Acc:ZDB-GENE-980526-168]	7	47629355	47639396	1	4	KNOWN	0.966055268	-1.030798493	0.064743225	2	NA
ENSDARG00000011141	dpysl5a	ENSDARG00000011141	3127.991018	1.245857512	1.40548952	1.651896589	0.020711586	0.001707953	0.000129473	X30 - X0_X3 - X0_X7 - X0	dihydropyrimidinase-like 5a [Source:ZFIN;Acc:ZDB-GENE-030131-3136]	17	37067120	37104167	-1	2	KNOWN	-0.141401777	-0.921772866	1.063174643	5	NA
ENSDARG00000011201	rplp2l	ENSDARG00000011201	4850.96381	2.00520561	5.841823052	3.871312581	0.000167762	2.17E-07	1.43E-06	X30 - X0_X3 - X0_X7 - X0	ribosomal protein, large P2, like [Source:ZFIN;Acc:ZDB-GENE-070327-2]	7	13785985	13795706	-1	1	KNOWN	1.008946279	-0.990806929	-0.018139349	2	NA
ENSDARG00000011259	trpm1a	ENSDARG00000011259	2373.746253	-1.282262088	-2.040579492	-1.741780142	0.028900301	3.66E-05	0.000219893	X30 - X0_X3 - X0_X7 - X0	transient receptor potential cation channel, subfamily M, member 1a [Source:ZFIN;Acc:ZDB-GENE-070112-1372]	7	30648884	30677872	-1	5	KNOWN	-0.92247249	1.062720558	-0.140248069	1	NA
ENSDARG00000011376	zgc:77816	ENSDARG00000011376	163.0491715	5.175153151	20.11317924	11.71013387	4.84E-05	2.29E-07	1.35E-06	X30 - X0_X3 - X0_X7 - X0	zgc:77816 [Source:ZFIN;Acc:ZDB-GENE-040426-1884]	22	5606722	5625795	1	6	KNOWN	1.038980263	-0.955827169	-0.083153094	2	NA
ENSDARG00000011404	fen1	ENSDARG00000011404	522.9050565	1.268702316	3.18031745	1.987415074	0.010339144	1.92E-07	8.09E-06	X30 - X0_X3 - X0_X7 - X0	flap structure-specific endonuclease 1 [Source:ZFIN;Acc:ZDB-GENE-031112-11]	24	11681062	11691834	1	1	KNOWN	1.071750263	-0.90804919	-0.163701073	2	NA
ENSDARG00000011405	rps9	ENSDARG00000011405	11334.69666	1.455216152	3.23620951	2.421866233	0.004992348	1.82E-06	1.47E-05	X30 - X0_X3 - X0_X7 - X0	ribosomal protein S9 [Source:ZFIN;Acc:ZDB-GENE-010724-15]	16	34143993	34146577	1	5	KNOWN	0.970312056	-1.027254622	0.056942566	2	NA
ENSDARG00000011445	ELMSAN1 (2 of 2)	ENSDARG00000011445	142.6312769	1.662092202	2.138865376	2.592016369	0.00890083	0.00067853	0.00013487	X30 - X0_X3 - X0_X7 - X0	ELM2 and Myb/SANT-like domain containing 1 [Source:HGNC Symbol;Acc:19853]	20	25916098	25931748	-1	3	KNOWN_BY_PROJECTION	0.016933023	-1.008358983	0.99142596	4	NA
ENSDARG00000011459	gsna	ENSDARG00000011459	916.0930986	1.733880495	4.618312583	3.634887816	0.000361074	2.19E-07	7.91E-07	X30 - X0_X3 - X0_X7 - X0	gelsolin a [Source:ZFIN;Acc:ZDB-GENE-030131-9653]	21	16084006	16114767	-1	4	KNOWN	0.879254769	-1.087842849	0.20858808	3	NA
ENSDARG00000011506	lpcat1	ENSDARG00000011506	108.5023683	1.32216159	1.550338957	1.616405565	0.027830969	0.002309369	0.00124962	X30 - X0_X3 - X0_X7 - X0	lysophosphatidylcholine acyltransferase 1 [Source:ZFIN;Acc:ZDB-GENE-060503-915]	19	28777041	28819829	1	5	KNOWN	0.350013007	-1.127958848	0.777945841	4	NA
ENSDARG00000011510	rcc2	ENSDARG00000011510	2035.935701	1.537826109	2.392471956	2.327513388	0.000944894	6.45E-06	8.31E-06	X30 - X0_X3 - X0_X7 - X0	regulator of chromosome condensation 2 [Source:ZFIN;Acc:ZDB-GENE-040426-2213]	23	21815648	21829182	-1	3	KNOWN	0.64426767	-1.152006944	0.507739274	3	NA
ENSDARG00000011519	zgc:114164	ENSDARG00000011519	56.93236502	4.085388991	7.335542476	6.07229755	0.001877199	8.66E-05	0.000237163	X30 - X0_X3 - X0_X7 - X0	zgc:114164 [Source:ZFIN;Acc:ZDB-GENE-050626-112]	3	22436301	22441663	-1	1	KNOWN	0.918225788	-1.065451126	0.147225339	3	NA
ENSDARG00000011573	abcb11a	ENSDARG00000011573	7.506716624	2.106168135	2.613992079	2.284604967	0.031137765	0.005303637	0.015037309	X30 - X0_X3 - X0_X7 - X0	ATP-binding cassette, sub-family B (MDR/TAP), member 11a [Source:ZFIN;Acc:ZDB-GENE-050517-13]	9	49806231	49864438	1	2	KNOWN	1.083246746	-0.8879359	-0.195310846	2	NA
ENSDARG00000011581	wu:fd60c08	ENSDARG00000011581	107.0387926	4.546663566	3.273721891	7.052639645	0.009216508	0.033996379	0.001248725	X30 - X0_X3 - X0_X7 - X0	wu:fd60c08 [Source:ZFIN;Acc:ZDB-GENE-030131-4787]	15	35618156	35637457	-1	1	KNOWN	-0.875829976	-0.213768516	1.089598492	8	NA
ENSDARG00000011600	epha4b	ENSDARG00000011600	349.1862989	-1.270978147	-1.606784962	-1.573515342	0.046220557	0.001042084	0.001448077	X30 - X0_X3 - X0_X7 - X0	eph receptor A4b [Source:ZFIN;Acc:ZDB-GENE-030826-6]	2	40081937	40266727	1	2	KNOWN	-0.664918664	1.150024239	-0.485105575	1	NA
ENSDARG00000011648	snrpd1	ENSDARG00000011648	771.4302317	1.179168742	2.006258382	1.395748907	0.02806471	2.19E-06	0.000449725	X30 - X0_X3 - X0_X7 - X0	small nuclear ribonucleoprotein D1 polypeptide [Source:ZFIN;Acc:ZDB-GENE-020419-14]	19	1996199	2001151	1	2	KNOWN	1.117288822	-0.811130582	-0.30615824	2	NA
ENSDARG00000011666	msh6	ENSDARG00000011666	463.9303201	1.297442427	3.416068022	2.034102976	0.005690206	1.15E-07	5.63E-06	X30 - X0_X3 - X0_X7 - X0	mutS homolog 6 (E. coli) [Source:ZFIN;Acc:ZDB-GENE-020905-3]	13	49380013	49402601	-1	4	KNOWN	1.084881911	-0.884893039	-0.199988873	2	NA
ENSDARG00000011696	esrrgb	ENSDARG00000011696	981.5094088	-1.579273149	-6.555639745	-5.837101446	0.040395925	6.70E-06	9.71E-06	X30 - X0_X3 - X0_X7 - X0	estrogen-related receptor gamma b [Source:ZFIN;Acc:ZDB-GENE-040616-4]	20	47041053	47068220	-1	1	KNOWN	-0.705745043	1.144354013	-0.43860897	1	NA
ENSDARG00000011724	marveld1	ENSDARG00000011724	29.61569101	3.152609101	17.73116357	10.39486444	0.032837976	2.63E-05	0.000211004	X30 - X0_X3 - X0_X7 - X0	MARVEL domain containing 1 [Source:ZFIN;Acc:ZDB-GENE-050208-33]	13	40050630	40051118	-1	1	KNOWN	1.002143327	-0.997842802	-0.004300524	2	NA
ENSDARG00000011821	plod2	ENSDARG00000011821	505.204024	2.368526572	7.605658543	6.019540508	0.001930668	3.69E-06	9.71E-06	X30 - X0_X3 - X0_X7 - X0	procollagen-lysine, 2-oxoglutarate 5-dioxygenase 2 [Source:ZFIN;Acc:ZDB-GENE-070326-1]	24	5317429	5394427	1	4	KNOWN	0.846907592	-1.103204227	0.256296635	3	NA
ENSDARG00000011863	ptk7a	ENSDARG00000011863	233.4319232	1.367352753	3.105511536	2.585779046	0.020969303	3.16E-06	1.23E-05	X30 - X0_X3 - X0_X7 - X0	protein tyrosine kinase 7a [Source:ZFIN;Acc:ZDB-GENE-050522-216]	22	41304083	41369035	-1	2	KNOWN	0.843588542	-1.104633036	0.261044495	3	NA
ENSDARG00000011876	ednraa	ENSDARG00000011876	288.2154591	1.613332697	3.536485304	3.841918902	0.038650403	9.75E-05	6.32E-05	X30 - X0_X3 - X0_X7 - X0	endothelin receptor type Aa [Source:ZFIN;Acc:ZDB-GENE-010906-2]	1	36373658	36410470	1	3	KNOWN	0.446318634	-1.14543897	0.699120336	4	NA
ENSDARG00000012066	dcn	ENSDARG00000012066	986.996759	2.517838831	9.386240979	8.003911104	0.022252741	5.16E-05	0.00011598	X30 - X0_X3 - X0_X7 - X0	decorin [Source:ZFIN;Acc:ZDB-GENE-010102-1]	4	15436583	15474921	-1	2	KNOWN	0.757062089	-1.133609017	0.376546928	3	NA
ENSDARG00000012073	kif15	ENSDARG00000012073	160.6310415	8.084378755	38.36678012	26.19362731	8.33E-06	5.51E-08	1.31E-07	X30 - X0_X3 - X0_X7 - X0	kinesin family member 15 [Source:ZFIN;Acc:ZDB-GENE-050622-16]	25	36128940	36155903	-1	5	KNOWN	0.928729551	-1.058583646	0.129854094	3	NA
ENSDARG00000012130	tgm1l1	ENSDARG00000012130	176.4764826	2.409730235	14.3018479	6.006562493	0.014519893	3.08E-06	9.83E-05	X30 - X0_X3 - X0_X7 - X0	transglutaminase 1 like 1 [Source:ZFIN;Acc:ZDB-GENE-060503-139]	2	51686652	51738436	1	2	KNOWN	1.103355672	-0.846558653	-0.256797019	2	NA
ENSDARG00000012247	def6a	ENSDARG00000012247	75.59079465	2.436455012	9.005939715	8.606205112	0.002086698	9.88E-07	1.23E-06	X30 - X0_X3 - X0_X7 - X0	differentially expressed in FDCP 6a homolog (mouse) [Source:ZFIN;Acc:ZDB-GENE-040426-1246]	8	14702246	14726803	-1	1	KNOWN	0.630768065	-1.152998942	0.522230877	3	NA
ENSDARG00000012405	col1a1a	ENSDARG00000012405	1262.425247	8.611124188	21.07873052	39.62576437	6.54E-05	4.53E-06	1.22E-06	X30 - X0_X3 - X0_X7 - X0	collagen, type I, alpha 1a [Source:ZFIN;Acc:ZDB-GENE-030131-9102]	3	23512288	23530699	1	3	KNOWN	-0.12984977	-0.928732137	1.058581907	5	NA
ENSDARG00000012450	vmp1	ENSDARG00000012450	3034.877215	1.50038527	8.309807701	4.463823625	0.031718036	5.54E-07	7.79E-06	X30 - X0_X3 - X0_X7 - X0	vacuole membrane protein 1 [Source:ZFIN;Acc:ZDB-GENE-030131-8733]	15	16362334	16392367	1	3	KNOWN	1.040293796	-0.954130323	-0.086163474	2	NA
ENSDARG00000012467	spint1b	ENSDARG00000012467	19.55093225	-1.5016979	-1.794428835	-1.817889029	0.027319409	0.004511512	0.003861894	X30 - X0_X3 - X0_X7 - X0	serine peptidase inhibitor, Kunitz type 1 b [Source:ZFIN;Acc:ZDB-GENE-071218-1]	20	3247530	3266747	-1	2	KNOWN	-0.509485695	1.152138103	-0.642652409	1	NA
ENSDARG00000012485	aurka	ENSDARG00000012485	101.4649176	4.031384213	34.50922896	18.44110139	9.58E-05	2.00E-08	8.97E-08	X30 - X0_X3 - X0_X7 - X0	aurora kinase A [Source:ZFIN;Acc:ZDB-GENE-040801-161]	6	59788992	59803932	1	3	KNOWN	1.017635826	-0.981377956	-0.03625787	2	NA
ENSDARG00000012506	rnpep	ENSDARG00000012506	259.5784064	1.904865385	8.724491858	5.091456169	0.001663061	1.81E-07	1.66E-06	X30 - X0_X3 - X0_X7 - X0	arginyl aminopeptidase (aminopeptidase B) [Source:ZFIN;Acc:ZDB-GENE-040718-241]	11	25692526	25716677	1	2	KNOWN	1.021092495	-0.977480491	-0.043612004	2	NA
ENSDARG00000012593	col5a1	ENSDARG00000012593	648.9982388	2.218153193	5.213184071	6.221469774	0.001494894	7.52E-06	4.07E-06	X30 - X0_X3 - X0_X7 - X0	procollagen, type V, alpha 1 [Source:ZFIN;Acc:ZDB-GENE-041105-6]	21	6513252	6682437	1	2	KNOWN	0.318051927	-1.120343928	0.802292001	4	NA
ENSDARG00000012600	HELZ2 (2 of 2)	ENSDARG00000012600	136.2575707	4.440945692	4.854566997	7.737738006	0.004225404	0.00237799	0.000352521	X30 - X0_X3 - X0_X7 - X0	helicase with zinc finger 2, transcriptional coactivator [Source:HGNC Symbol;Acc:30021]	2	42050304	42076835	-1	2	KNOWN_BY_PROJECTION	-0.45835557	-0.688663502	1.147019072	5	NA
ENSDARG00000012694	c3a	ENSDARG00000012694	8.001838563	15.05762281	11.53099573	5.065438515	0.001773565	0.002739895	0.03008008	X30 - X0_X3 - X0_X7 - X0	complement component c3a [Source:ZFIN;Acc:ZDB-GENE-990415-35]	1	56676993	56723747	-1	2	KNOWN	0.193314518	0.889229206	-1.082543725	7	NA
ENSDARG00000012729	hcls1	ENSDARG00000012729	447.0270538	3.172159039	15.66772781	9.649299337	0.000153795	1.82E-07	8.92E-07	X30 - X0_X3 - X0_X7 - X0	hematopoietic cell-specific Lyn substrate 1 [Source:ZFIN;Acc:ZDB-GENE-030131-7191]	4	21236017	21247351	-1	2	KNOWN	0.987541566	-1.012009378	0.024467811	2	NA
ENSDARG00000012776	SMARCA1	ENSDARG00000012776	988.6006913	-1.263318261	-1.90867997	-1.496411311	0.025926136	4.29E-05	0.001134065	X30 - X0_X3 - X0_X7 - X0	SWI/SNF related, matrix associated, actin dependent regulator of chromatin, subfamily a, member 1 [Source:HGNC Symbol;Acc:11097]	5	23636042	23671696	-1	3	KNOWN_BY_PROJECTION	-1.07877425	0.896016607	0.182757643	6	NA
ENSDARG00000012827	mettl3	ENSDARG00000012827	250.0133953	1.296717517	2.29149861	1.772702072	0.046422503	3.59E-05	0.000546281	X30 - X0_X3 - X0_X7 - X0	methyltransferase like 3 [Source:ZFIN;Acc:ZDB-GENE-030131-9498]	7	23045025	23055587	-1	1	KNOWN	1.014032554	-0.985350349	-0.028682205	2	NA
ENSDARG00000012972	cfl1l	ENSDARG00000012972	255.7604305	2.7421406	23.16320666	13.81128322	0.002938067	2.85E-07	1.40E-06	X30 - X0_X3 - X0_X7 - X0	cofilin 1 (non-muscle), like [Source:ZFIN;Acc:ZDB-GENE-040426-2770]	13	33831214	33833902	1	1	KNOWN	0.970826327	-1.026820757	0.05599443	2	NA
ENSDARG00000013004	tdg	ENSDARG00000013004	749.4120584	1.2261901	1.714942679	1.530954544	0.028730676	7.11E-05	0.000381131	X30 - X0_X3 - X0_X7 - X0	thymine-DNA glycosylase [Source:ZFIN;Acc:ZDB-GENE-050522-44]	25	19454892	19468010	1	1	KNOWN	0.908430719	-1.071520164	0.163089444	3	NA
ENSDARG00000013087	ndrg3a	ENSDARG00000013087	7979.031144	-1.1997988	-1.576572687	-1.597420314	0.044488051	0.000226589	0.000190871	X30 - X0_X3 - X0_X7 - X0	N-myc downstream regulated family member 3a [Source:ZFIN;Acc:ZDB-GENE-980526-124]	11	25998078	26072620	1	6	KNOWN	-0.530145421	1.153447279	-0.623301858	1	NA
ENSDARG00000013153	dennd3b	ENSDARG00000013153	7.482583868	4.345527366	8.833228246	7.628434921	0.015163986	0.000697648	0.001526669	X30 - X0_X3 - X0_X7 - X0	DENN/MADD domain containing 3b [Source:ZFIN;Acc:ZDB-GENE-091230-7]	16	33178778	33207488	-1	5	KNOWN	0.816950785	-1.115188603	0.298237818	3	NA
ENSDARG00000013168	jag1b	ENSDARG00000013168	233.6038504	1.433363661	1.788887133	2.132177972	0.043950015	0.002562314	0.000432158	X30 - X0_X3 - X0_X7 - X0	jagged 1b [Source:ZFIN;Acc:ZDB-GENE-011128-4]	13	35560774	35611687	1	1	KNOWN	0.011669298	-1.005783583	0.994114285	4	NA
ENSDARG00000013221	pde4ca	ENSDARG00000013221	211.2561961	-1.286719548	-3.158260042	-2.22188963	0.042003587	3.80E-06	4.58E-05	X30 - X0_X3 - X0_X7 - X0	phosphodiesterase 4C, cAMP-specific a [Source:ZFIN;Acc:ZDB-GENE-070912-373]	2	24550615	24632413	1	5	KNOWN	-1.000213718	0.999786145	0.000427573	1	NA
ENSDARG00000013250	tars	ENSDARG00000013250	1718.870296	1.23070591	2.131113473	1.584072912	0.013801588	2.22E-06	8.44E-05	X30 - X0_X3 - X0_X7 - X0	threonyl-tRNA synthetase [Source:ZFIN;Acc:ZDB-GENE-041010-218]	5	45965273	45989759	1	2	KNOWN	1.063528976	-0.921225125	-0.142303851	2	NA
ENSDARG00000013307	rpl19	ENSDARG00000013307	10920.44629	1.417308299	2.606166687	2.237626523	0.006827768	6.91E-06	2.65E-05	X30 - X0_X3 - X0_X7 - X0	ribosomal protein L19 [Source:ZFIN;Acc:ZDB-GENE-040426-2290]	3	15849892	15852423	1	3	KNOWN	0.853040382	-1.100494656	0.247454275	3	NA
ENSDARG00000013472	nedd1	ENSDARG00000013472	311.5958032	1.31195231	2.878206744	2.024927408	0.015572012	1.42E-06	2.86E-05	X30 - X0_X3 - X0_X7 - X0	neural precursor cell expressed, developmentally down-regulated 1 [Source:ZFIN;Acc:ZDB-GENE-040426-2906]	25	20031091	20047058	1	3	KNOWN	1.028485231	-0.968845296	-0.059639935	2	NA
ENSDARG00000013475	cct4	ENSDARG00000013475	3996.130352	1.360731507	2.829718725	1.976412725	0.003492329	7.11E-07	1.50E-05	X30 - X0_X3 - X0_X7 - X0	chaperonin containing TCP1, subunit 4 (delta) [Source:ZFIN;Acc:ZDB-GENE-040426-1421]	1	54262347	54275393	-1	1	KNOWN	1.049353917	-0.941980527	-0.10737339	2	NA
ENSDARG00000013476	arhgef39	ENSDARG00000013476	39.17493294	4.382928935	49.52913607	18.06869984	0.008546501	2.91E-07	1.00E-05	X30 - X0_X3 - X0_X7 - X0	Rho guanine nucleotide exchange factor (GEF) 39 [Source:ZFIN;Acc:ZDB-GENE-041114-28]	4	11477727	11541748	-1	3	KNOWN	1.103098126	-0.847151656	-0.255946471	2	NA
ENSDARG00000013489	gltscr2	ENSDARG00000013489	1755.742851	1.340701858	1.74609338	1.72481894	0.011448189	0.000206376	0.000262345	X30 - X0_X3 - X0_X7 - X0	glioma tumor suppressor candidate region gene 2 [Source:ZFIN;Acc:ZDB-GENE-051120-21]	15	6532402	6546523	-1	2	KNOWN	0.623344303	-1.15344493	0.530100627	3	NA
ENSDARG00000013526	SVEP1	ENSDARG00000013526	42.48302792	1.961609257	2.699868422	3.746600681	0.046040598	0.003866433	0.000436607	X30 - X0_X3 - X0_X7 - X0	sushi, von Willebrand factor type A, EGF and pentraxin domain containing 1 [Source:HGNC Symbol;Acc:15985]	7	25419150	25521741	1	1	KNOWN_BY_PROJECTION	-0.114640715	-0.937739003	1.052379717	5	NA
ENSDARG00000013528	mcm9	ENSDARG00000013528	36.27639131	1.82732273	5.41264886	4.018722506	0.038086364	2.48E-05	0.000134552	X30 - X0_X3 - X0_X7 - X0	minichromosome maintenance complex component 9 [Source:ZFIN;Acc:ZDB-GENE-041014-310]	20	41833644	41871475	1	2	KNOWN	0.918316524	-1.065393424	0.1470769	3	NA
ENSDARG00000013539	ikzf1	ENSDARG00000013539	65.81030558	1.599453303	2.540822539	2.711686348	0.030761641	0.000370263	0.000229978	X30 - X0_X3 - X0_X7 - X0	IKAROS family zinc finger 1 (Ikaros) [Source:ZFIN;Acc:ZDB-GENE-980526-304]	13	15911857	15948447	-1	5	KNOWN	0.42881036	-1.142893875	0.714083515	4	NA
ENSDARG00000013598	tnfb	ENSDARG00000013598	48.47596927	4.805071588	24.25658718	15.81939003	0.03183051	4.41E-05	0.000196323	X30 - X0_X3 - X0_X7 - X0	tumor necrosis factor b (TNF superfamily, member 2) [Source:ZFIN;Acc:ZDB-GENE-050601-2]	15	33995840	33998916	1	2	KNOWN	0.953052676	-1.041121722	0.088069047	2	NA
ENSDARG00000013669	NAPB (2 of 2)	ENSDARG00000013669	505.9840157	-1.21435207	-1.904590628	-1.794106936	0.045563324	3.14E-05	6.30E-05	X30 - X0_X3 - X0_X7 - X0	N-ethylmaleimide-sensitive factor attachment protein, beta [Source:HGNC Symbol;Acc:15751]	17	4073142	4085351	-1	1	KNOWN_BY_PROJECTION	-0.719904153	1.141811084	-0.421906931	1	NA
ENSDARG00000013681	SHISA4 (4 of 4)	ENSDARG00000013681	1510.779913	1.817865276	5.161663261	3.873243451	0.001607426	1.11E-06	4.69E-06	X30 - X0_X3 - X0_X7 - X0	shisa homolog 4 (Xenopus laevis) [Source:HGNC Symbol;Acc:27139]	22	10670836	10680925	-1	2	KNOWN_BY_PROJECTION	0.915551307	-1.067139545	0.151588238	3	NA
ENSDARG00000013719	GTSE1	ENSDARG00000013719	101.2826567	9.581354897	88.1148183	38.67672359	3.07E-05	2.25E-08	1.47E-07	X30 - X0_X3 - X0_X7 - X0	G-2 and S-phase expressed 1 [Source:HGNC Symbol;Acc:13698]	25	20084387	20098470	-1	3	KNOWN_BY_PROJECTION	1.07439569	-0.903606669	-0.170789021	2	NA
ENSDARG00000013771	ctssb.2	ENSDARG00000013771	996.0010249	4.660283254	17.24273875	14.8080357	6.25E-06	6.69E-08	9.89E-08	X30 - X0_X3 - X0_X7 - X0	cathepsin Sb, tandem duplicate 2 [Source:ZFIN;Acc:ZDB-GENE-050626-55]	16	31774764	31780268	1	2	KNOWN	0.75007613	-1.135327056	0.385250926	3	NA
ENSDARG00000013777	ppp1r13l	ENSDARG00000013777	171.0786985	2.503634514	8.253830903	8.216295523	0.016963431	2.99E-05	3.35E-05	X30 - X0_X3 - X0_X7 - X0	protein phosphatase 1, regulatory (inhibitor) subunit 13 like [Source:ZFIN;Acc:ZDB-GENE-050327-33]	18	34182768	34238657	1	3	KNOWN	0.583012531	-1.154681967	0.571669436	4	NA
ENSDARG00000013784	zgc:77158	ENSDARG00000013784	211.1283025	1.940609688	3.774101004	3.228069414	0.000792131	4.40E-06	1.18E-05	X30 - X0_X3 - X0_X7 - X0	zgc:77158 [Source:ZFIN;Acc:ZDB-GENE-040426-1799]	25	17238140	17298674	1	1	KNOWN	0.842548408	-1.105075444	0.262527036	3	NA
ENSDARG00000013800	snrpd3	ENSDARG00000013800	290.6231688	1.257264691	2.82820438	1.987335023	0.03239379	1.34E-06	2.95E-05	X30 - X0_X3 - X0_X7 - X0	small nuclear ribonucleoprotein D3 polypeptide [Source:ZFIN;Acc:ZDB-GENE-040625-55]	8	31590940	31593640	1	1	KNOWN	1.02266261	-0.97568127	-0.04698134	2	NA
ENSDARG00000013834	arhgef3	ENSDARG00000013834	55.45114163	-1.335900413	-1.532616533	-1.380294515	0.023495538	0.002976897	0.013744698	X30 - X0_X3 - X0_X7 - X0	Rho guanine nucleotide exchange factor (GEF) 3 [Source:ZFIN;Acc:ZDB-GENE-050208-773]	22	41997100	42038480	1	3	KNOWN	-1.127661033	0.778971042	0.348689991	6	NA
ENSDARG00000013916	ptpn6	ENSDARG00000013916	390.4240805	1.906449451	9.091839209	5.547886795	0.002855139	3.09E-07	2.20E-06	X30 - X0_X3 - X0_X7 - X0	protein tyrosine phosphatase, non-receptor type 6 [Source:ZFIN;Acc:ZDB-GENE-030131-7513]	16	34227715	34240643	-1	1	KNOWN	0.193728356	-1.025153075	-0.407444014	9	NA
ENSDARG00000013926	slc16a9a	ENSDARG00000013926	881.8015429	2.981605339	8.352879023	7.491007516	0.025043006	0.000456304	0.000731375	X30 - X0_X3 - X0_X7 - X0	solute carrier family 16 (monocarboxylic acid transporters), member 9a [Source:ZFIN;Acc:ZDB-GENE-040426-1364]	17	20483926	20496769	-1	3	KNOWN	0.720259581	-1.141743251	0.42148367	3	NA
ENSDARG00000013931	eif3m	ENSDARG00000013931	2814.219228	1.352422912	2.154015328	1.957707137	0.004711875	7.57E-06	2.13E-05	X30 - X0_X3 - X0_X7 - X0	eukaryotic translation initiation factor 3, subunit M [Source:ZFIN;Acc:ZDB-GENE-040426-2643]	18	44059348	44072067	1	1	KNOWN	0.796111139	-1.122386496	0.326275357	3	NA
ENSDARG00000014017	rrm1	ENSDARG00000014017	1055.357697	1.71295658	5.683467274	3.256387508	0.003637583	1.22E-06	1.98E-05	X30 - X0_X3 - X0_X7 - X0	ribonucleotide reductase M1 polypeptide [Source:ZFIN;Acc:ZDB-GENE-990415-247]	21	29535097	29550468	-1	2	KNOWN	1.065425267	-0.918266457	-0.14715881	2	NA
ENSDARG00000014024	ms4a17a.4	ENSDARG00000014024	7.363710392	4.820165298	13.73612948	10.19195241	0.016545465	0.000314232	0.00101028	X30 - X0_X3 - X0_X7 - X0	membrane-spanning 4-domains, subfamily A, member 17A.4 [Source:ZFIN;Acc:ZDB-GENE-070822-16]	4	60701171	60804565	1	2	KNOWN	0.925216061	-1.060923524	0.135707463	3	NA
ENSDARG00000014031	abcc2	ENSDARG00000014031	81.527259	1.698620223	2.465594812	2.465377752	0.007634137	0.000180684	0.000178631	X30 - X0_X3 - X0_X7 - X0	ATP-binding cassette, sub-family C (CFTR/MRP), member 2 [Source:ZFIN;Acc:ZDB-GENE-040426-1523]	13	553345	583302	1	2	KNOWN	0.577595379	-1.154700504	0.577105125	4	NA
ENSDARG00000014059	cldn5b	ENSDARG00000014059	295.8145143	3.517846047	5.56112422	5.837965004	0.014153546	0.001641517	0.001327328	X30 - X0_X3 - X0_X7 - X0	claudin 5b [Source:ZFIN;Acc:ZDB-GENE-041010-140]	10	45496611	45498257	1	2	KNOWN	0.464661039	-1.147790835	0.683129796	4	NA
ENSDARG00000014085	si:ch211-266k8.3	ENSDARG00000014085	528.1805941	1.263222518	2.762759884	2.005206633	0.020678667	1.03E-06	1.69E-05	X30 - X0_X3 - X0_X7 - X0	si:ch211-266k8.3 [Source:ZFIN;Acc:ZDB-GENE-030131-4183]	25	16958895	16970968	1	1	KNOWN	1.003442847	-0.996521221	-0.006921626	2	NA
ENSDARG00000014169	SYT2 (2 of 2)	ENSDARG00000014169	354.2142956	-1.39393075	-1.999172928	-1.81918464	0.017864113	0.000207071	0.000522731	X30 - X0_X3 - X0_X7 - X0	synaptotagmin II [Source:HGNC Symbol;Acc:11510]	6	55148531	55171494	1	1	KNOWN_BY_PROJECTION	-0.842178747	1.105232062	-0.263053315	1	NA
ENSDARG00000014248	pdlim3b	ENSDARG00000014248	30.14813603	4.185140325	3.316894252	6.019767151	0.001955467	0.007752251	0.000291176	X30 - X0_X3 - X0_X7 - X0	PDZ and LIM domain 3b [Source:ZFIN;Acc:ZDB-GENE-060130-104]	14	30652299	30669733	-1	3	KNOWN	-0.862633337	-0.233437267	1.096070604	8	NA
ENSDARG00000014259	eya1	ENSDARG00000014259	88.69688711	3.526364424	6.152362931	6.078999306	0.000115512	5.25E-06	5.53E-06	X30 - X0_X3 - X0_X7 - X0	eyes absent homolog 1 [Source:ZFIN;Acc:ZDB-GENE-990712-18]	24	13829199	13919592	1	6	KNOWN	0.60170643	-1.154353086	0.552646656	4	NA
ENSDARG00000014274	rfc2	ENSDARG00000014274	300.5448428	1.192024764	2.460695161	1.872403575	0.039826225	9.23E-07	1.30E-05	X30 - X0_X3 - X0_X7 - X0	replication factor C (activator 1) 2 [Source:ZFIN;Acc:ZDB-GENE-050306-29]	21	24484010	24491337	-1	2	KNOWN	0.974949055	-1.023297031	0.048347976	2	NA
ENSDARG00000014329	npm1a	ENSDARG00000014329	2230.753651	1.41114023	5.763683596	2.54227708	0.015245749	2.29E-07	2.34E-05	X30 - X0_X3 - X0_X7 - X0	nucleophosmin 1a [Source:ZFIN;Acc:ZDB-GENE-021028-1]	10	22234687	22245329	1	8	KNOWN	1.11790522	-0.809384117	-0.308521103	2	NA
ENSDARG00000014340	rab11al	ENSDARG00000014340	165.7171682	-1.272700943	-1.419349011	-1.640688738	0.028569172	0.004246153	0.000494323	X30 - X0_X3 - X0_X7 - X0	RAB11a, member RAS oncogene family, like [Source:ZFIN;Acc:ZDB-GENE-031118-188]	16	49892216	49908891	1	1	KNOWN	0.134395802	0.926005666	-1.060401468	7	NA
ENSDARG00000014348	stk17b	ENSDARG00000014348	339.4365942	1.323500981	2.310386394	2.007548452	0.030448647	2.66E-05	0.000111446	X30 - X0_X3 - X0_X7 - X0	serine/threonine kinase 17b (apoptosis-inducing) [Source:ZFIN;Acc:ZDB-GENE-040426-1499]	9	25225715	25234504	1	2	KNOWN	0.850351504	-1.101693852	0.251342348	3	NA
ENSDARG00000014358	optc	ENSDARG00000014358	154.885961	11.46068744	29.92423926	23.98556043	0.010909159	0.000364641	0.00102989	X30 - X0_X3 - X0_X7 - X0	opticin [Source:ZFIN;Acc:ZDB-GENE-030131-1798]	11	24140268	24153746	-1	1	KNOWN	0.862983987	-1.0959045	0.232920513	3	NA
ENSDARG00000014378	slc12a4	ENSDARG00000014378	1089.25013	1.350999089	3.075310476	2.189628873	0.023516923	3.75E-06	5.79E-05	X30 - X0_X3 - X0_X7 - X0	solute carrier family 12 (potassium/chloride transporters), member 4 [Source:ZFIN;Acc:ZDB-GENE-090218-27]	7	36737566	36768914	-1	1	KNOWN	1.008970565	-0.990781282	-0.018189283	2	NA
ENSDARG00000014385	chek1	ENSDARG00000014385	82.19160465	2.597800216	14.73296794	7.572613874	0.004642162	9.64E-07	1.19E-05	X30 - X0_X3 - X0_X7 - X0	CHK1 checkpoint homolog (S. pombe) [Source:ZFIN;Acc:ZDB-GENE-040426-896]	21	21673131	21680230	1	5	KNOWN	1.054348772	-0.934926148	-0.119422624	2	NA
ENSDARG00000014386	galnt6	ENSDARG00000014386	103.7835953	1.903148202	4.677877738	3.31290259	0.025578307	4.47E-05	0.000365947	X30 - X0_X3 - X0_X7 - X0	UDP-N-acetyl-alpha-D-galactosamine:polypeptide N-acetylgalactosaminyltransferase 6 (GalNAc-T6) [Source:ZFIN;Acc:ZDB-GENE-040426-2272]	23	27003975	27025408	-1	2	KNOWN	0.994577417	-1.005335774	0.010758357	2	NA
ENSDARG00000014427	mxe	ENSDARG00000014427	91.87215907	11.45786493	7.140589395	16.11443186	0.014014539	0.034279704	0.002507863	X30 - X0_X3 - X0_X7 - X0	myxovirus (influenza virus) resistance E [Source:ZFIN;Acc:ZDB-GENE-030131-9609]	9	33857947	33873106	-1	4	KNOWN	-0.987161857	-0.025199951	1.012361808	8	NA
ENSDARG00000014432	ccdc77	ENSDARG00000014432	106.201129	1.542624488	2.655968821	2.270908547	0.032964175	0.000204069	0.000858945	X30 - X0_X3 - X0_X7 - X0	coiled-coil domain containing 77 [Source:ZFIN;Acc:ZDB-GENE-050913-54]	25	3666022	3679403	-1	8	KNOWN	0.883356473	-1.085697651	0.202341177	3	NA
ENSDARG00000014499	nutf2l	ENSDARG00000014499	169.3896921	3.173188029	14.70424454	8.927118071	6.55E-05	6.64E-08	3.16E-07	X30 - X0_X3 - X0_X7 - X0	nuclear transport factor 2, like [Source:ZFIN;Acc:ZDB-GENE-020416-1]	19	21260308	21266055	1	1	KNOWN	1.000669874	-0.999328777	-0.001341098	2	NA
ENSDARG00000014587	slc38a5b	ENSDARG00000014587	203.0866545	2.084717323	3.065546233	4.057463404	0.003673016	0.000211591	3.87E-05	X30 - X0_X3 - X0_X7 - X0	solute carrier family 38, member 5b [Source:ZFIN;Acc:ZDB-GENE-040718-395]	8	24432917	24465405	-1	3	KNOWN	-0.00374713	-0.99812117	1.001868299	4	NA
ENSDARG00000014591	ilf2	ENSDARG00000014591	3356.539768	1.233693411	2.134307487	1.603375961	0.010632315	1.79E-06	5.49E-05	X30 - X0_X3 - X0_X7 - X0	interleukin enhancer binding factor 2 [Source:ZFIN;Acc:ZDB-GENE-040426-2345]	19	39050549	39057468	-1	1	KNOWN	1.054064479	-0.935334892	-0.118729587	2	NA
ENSDARG00000014655	itpr1a	ENSDARG00000014655	226.3844401	1.420804305	2.332035711	2.624477122	0.047986429	0.000217374	8.33E-05	X30 - X0_X3 - X0_X7 - X0	inositol 1,4,5-triphosphate receptor, type 1a [Source:ZFIN;Acc:ZDB-GENE-070604-3]	6	39853916	39922418	1	2	KNOWN	0.328556663	-1.12294297	0.794386307	4	NA
ENSDARG00000014657	zgc:171731	ENSDARG00000014657	23.297567	8.100921892	15.45667345	16.9981499	0.004574607	0.000272107	0.000189012	X30 - X0_X3 - X0_X7 - X0	zgc:171731 [Source:ZFIN;Acc:ZDB-GENE-071004-27]	7	20757858	20762495	1	1	KNOWN	0.407614682	-1.139428901	0.731814219	4	NA
ENSDARG00000014680	znf710a	ENSDARG00000014680	193.6098477	1.271459104	2.493034947	2.248202386	0.046527243	8.81E-06	2.24E-05	X30 - X0_X3 - X0_X7 - X0	zinc finger protein 710a [Source:ZFIN;Acc:ZDB-GENE-030131-5559]	18	25831823	25880477	1	1	KNOWN	0.756310086	-1.133798008	0.377487922	3	NA
ENSDARG00000014685	esco2	ENSDARG00000014685	250.7266781	3.327330439	17.50171787	9.401886148	0.000235167	1.80E-07	1.26E-06	X30 - X0_X3 - X0_X7 - X0	establishment of cohesion 1 homolog 2 [Source:ZFIN;Acc:ZDB-GENE-050913-156]	20	39369598	39383863	1	1	KNOWN	1.044081049	-0.949148324	-0.094932724	2	NA
ENSDARG00000014690	rps4x	ENSDARG00000014690	13788.09996	1.501029838	3.051958882	2.461090943	0.00123971	9.53E-07	4.60E-06	X30 - X0_X3 - X0_X7 - X0	ribosomal protein S4, X-linked [Source:ZFIN;Acc:ZDB-GENE-040927-19]	7	53088995	53094879	-1	3	KNOWN	0.912077496	-1.069297242	0.157219746	3	NA
ENSDARG00000014709	grb2a	ENSDARG00000014709	144.961691	1.386349291	1.574930352	1.792052478	0.015772954	0.002204523	0.000407469	X30 - X0_X3 - X0_X7 - X0	growth factor receptor-bound protein 2a [Source:ZFIN;Acc:ZDB-GENE-041121-1]	6	18617878	18655122	1	2	KNOWN	-0.046861109	-0.97574562	1.022606729	4	NA
ENSDARG00000014770	usp4	ENSDARG00000014770	2359.027027	-1.1747591	-1.252712233	-1.367354959	0.034097905	0.00614634	0.000781006	X30 - X0_X3 - X0_X7 - X0	ubiquitin specific protease 4 (proto-oncogene) [Source:ZFIN;Acc:ZDB-GENE-041008-187]	6	42277420	42300392	-1	1	NOVEL	0.126239034	0.930886408	-1.057125442	7	NA
ENSDARG00000014793	ehd1b	ENSDARG00000014793	337.0686107	1.626671283	5.40275862	3.761735641	0.025129796	6.07E-06	4.42E-05	X30 - X0_X3 - X0_X7 - X0	EH-domain containing 1b [Source:ZFIN;Acc:ZDB-GENE-030131-2069]	10	27703744	27728527	1	1	KNOWN	0.953671709	-1.04064673	0.086975021	2	NA
ENSDARG00000014796	wnt11r	ENSDARG00000014796	102.4770307	1.706255007	2.159987718	4.385914161	0.039803391	0.006986186	5.74E-05	X30 - X0_X3 - X0_X7 - X0	wingless-type MMTV integration site family, member 11, related [Source:ZFIN;Acc:ZDB-GENE-980526-249]	10	33059096	33077995	1	1	KNOWN	-0.411895415	-0.728266735	1.14016215	5	NA
ENSDARG00000014830	faua	ENSDARG00000014830	5368.112478	1.414850524	2.553996121	2.090317841	0.006630574	7.68E-06	4.75E-05	X30 - X0_X3 - X0_X7 - X0	Finkel-Biskis-Reilly murine sarcoma virus (FBR-MuSV) ubiquitously expressed a [Source:ZFIN;Acc:ZDB-GENE-040426-1700]	20	54591834	54601610	-1	3	KNOWN	0.932669223	-1.055907415	0.123238192	2	NA
ENSDARG00000014859	igfbp3	ENSDARG00000014859	404.9988072	1.471500276	2.345959438	1.759711548	0.020951739	0.000135335	0.002241184	X30 - X0_X3 - X0_X7 - X0	insulin-like growth factor binding protein 3 [Source:ZFIN;Acc:ZDB-GENE-040412-1]	20	7037979	7090577	-1	2	KNOWN	1.092654908	-0.869714125	-0.222940783	2	NA
ENSDARG00000014867	rpl8	ENSDARG00000014867	12397.31629	1.533244606	3.096498254	2.494795872	0.002200699	2.32E-06	1.16E-05	X30 - X0_X3 - X0_X7 - X0	ribosomal protein L8 [Source:ZFIN;Acc:ZDB-GENE-040426-1670]	9	34356412	34363095	-1	4	KNOWN	0.915221925	-1.06734584	0.152123916	3	NA
ENSDARG00000014910	panx1b	ENSDARG00000014910	157.4421762	1.38125144	1.583707972	1.51566009	0.020737861	0.002828144	0.004777268	X30 - X0_X3 - X0_X7 - X0	pannexin 1b [Source:ZFIN;Acc:ZDB-GENE-070705-192]	5	39441094	39449968	1	1	KNOWN	0.875206778	-1.089914528	0.21470775	3	NA
ENSDARG00000014943	kif23	ENSDARG00000014943	272.8089636	12.99350818	74.61342429	43.26866147	1.11E-06	1.61E-08	3.94E-08	X30 - X0_X3 - X0_X7 - X0	kinesin family member 23 [Source:ZFIN;Acc:ZDB-GENE-991019-4]	18	20217003	20239123	-1	3	KNOWN	1.005735555	-0.994164017	-0.011571538	2	Yes
ENSDARG00000015010	CCDC114	ENSDARG00000015010	18.88677369	3.9189261	15.48675117	4.633336902	0.00221032	1.90E-06	0.000814795	X30 - X0_X3 - X0_X7 - X0	coiled-coil domain containing 114 [Source:HGNC Symbol;Acc:26560]	11	42189798	42204454	-1	2	KNOWN_BY_PROJECTION	1.152946065	-0.631577733	-0.521368332	2	NA
ENSDARG00000015016	KIF26A (1 of 2)	ENSDARG00000015016	264.1339055	1.51998898	1.701701873	2.974258237	0.03021554	0.006459492	4.73E-05	X30 - X0_X3 - X0_X7 - X0	kinesin family member 26A [Source:HGNC Symbol;Acc:20226]	17	45985229	46156980	1	1	KNOWN_BY_PROJECTION	-0.458881603	-0.688203332	1.147084935	5	NA
ENSDARG00000015065	c4	ENSDARG00000015065	77.42235976	12.92548177	6.655186221	14.65026062	8.62E-05	0.001191166	7.20E-05	X30 - X0_X3 - X0_X7 - X0	complement component 4 [Source:ZFIN;Acc:ZDB-GENE-030131-5697]	15	31598256	31629790	-1	2	KNOWN	-1.130184169	0.360121822	0.770062347	8	NA
ENSDARG00000015070	pola2	ENSDARG00000015070	223.5402185	1.617994232	5.524268516	3.15767046	0.003580922	3.32E-07	6.66E-06	X30 - X0_X3 - X0_X7 - X0	polymerase (DNA directed), alpha 2 [Source:ZFIN;Acc:ZDB-GENE-030131-778]	8	17694196	17703882	-1	1	KNOWN	1.062656186	-0.922571461	-0.140084725	2	NA
ENSDARG00000015111	ddx39ab	ENSDARG00000015111	2305.313823	1.202209133	2.189769631	1.643116639	0.016925569	1.02E-06	2.77E-05	X30 - X0_X3 - X0_X7 - X0	DEAD (Asp-Glu-Ala-Asp) box polypeptide 39Ab [Source:ZFIN;Acc:ZDB-GENE-040426-2902]	3	6136694	6161664	-1	1	KNOWN	1.03371901	-0.962470048	-0.071248962	2	NA
ENSDARG00000015128	rpl27	ENSDARG00000015128	6553.65409	1.515307144	3.104864211	2.476795379	0.001263195	1.03E-06	5.36E-06	X30 - X0_X3 - X0_X7 - X0	ribosomal protein L27 [Source:ZFIN;Acc:ZDB-GENE-030131-4343]	3	30045085	30050349	-1	2	KNOWN	0.923335158	-1.062158328	0.13882317	3	NA
ENSDARG00000015208	rbb4l	ENSDARG00000015208	1256.099341	1.207177641	2.143441052	1.583617206	0.04372826	6.45E-06	0.000256317	X30 - X0_X3 - X0_X7 - X0	retinoblastoma binding protein 4, like [Source:ZFIN;Acc:ZDB-GENE-030131-848]	11	12802549	12826559	1	5	KNOWN	1.058542533	-0.928790702	-0.129751831	2	NA
ENSDARG00000015263	ADM (2 of 2)	ENSDARG00000015263	408.7202769	1.8030483	6.319442361	3.639580822	0.002039328	4.43E-07	6.68E-06	X30 - X0_X3 - X0_X7 - X0	adrenomedullin [Source:HGNC Symbol;Acc:259]	7	68773102	68774762	-1	1	KNOWN_BY_PROJECTION	1.056122544	-0.932355569	-0.123766975	2	NA
ENSDARG00000015325	u2af1	ENSDARG00000015325	1375.434989	1.200460684	1.803253387	1.439887495	0.01861795	8.29E-06	0.000267324	X30 - X0_X3 - X0_X7 - X0	U2(RNU2) small nuclear RNA auxiliary factor 1 [Source:ZFIN;Acc:ZDB-GENE-020419-1]	9	9451858	9464189	-1	1	KNOWN	1.061086015	-0.924969619	-0.136116396	2	NA
ENSDARG00000015403	arhgap11a	ENSDARG00000015403	135.5549774	1.865283133	6.909915892	3.708593915	0.001787358	2.53E-07	5.89E-06	X30 - X0_X3 - X0_X7 - X0	Rho GTPase activating protein 11A [Source:ZFIN;Acc:ZDB-GENE-040426-2562]	17	734497	755525	-1	1	KNOWN	1.07680499	-0.899467947	-0.177337043	2	NA
ENSDARG00000015422	ppil1	ENSDARG00000015422	165.2845801	1.791253043	4.862193639	3.100938363	0.008460839	7.29E-06	0.000100156	X30 - X0_X3 - X0_X7 - X0	peptidylprolyl isomerase (cyclophilin)-like 1 [Source:ZFIN;Acc:ZDB-GENE-051009-1]	6	40578657	40582808	-1	1	KNOWN	1.045255292	-0.947575914	-0.097679378	2	NA
ENSDARG00000015427	hdac1	ENSDARG00000015427	5654.949412	1.180106311	1.672663897	1.434023723	0.029740773	2.25E-05	0.000287746	X30 - X0_X3 - X0_X7 - X0	histone deacetylase 1 [Source:ZFIN;Acc:ZDB-GENE-020419-32]	19	31054097	31064046	1	3	KNOWN	0.989502647	-1.010176763	0.020674116	2	NA
ENSDARG00000015460	racgap1	ENSDARG00000015460	184.6451903	10.84133461	65.35386294	39.18980125	6.21E-05	2.03E-07	7.04E-07	X30 - X0_X3 - X0_X7 - X0	Rac GTPase-activating protein 1 [Source:ZFIN;Acc:ZDB-GENE-030131-1917]	23	33974077	33988915	-1	3	KNOWN	0.986378854	-1.013086116	0.026707262	2	NA
ENSDARG00000015472	gpc4	ENSDARG00000015472	279.7941826	1.390945722	2.828246076	2.739120446	0.018116311	7.03E-06	9.04E-06	X30 - X0_X3 - X0_X7 - X0	glypican 4 [Source:ZFIN;Acc:ZDB-GENE-011119-1]	14	31961765	32020938	-1	1	KNOWN	0.631800449	-1.152931374	0.521130924	3	NA
ENSDARG00000015490	rpl24	ENSDARG00000015490	8270.911827	1.397133433	2.716926371	2.21376239	0.006929939	3.89E-06	2.21E-05	X30 - X0_X3 - X0_X7 - X0	ribosomal protein L24 [Source:ZFIN;Acc:ZDB-GENE-020419-25]	1	603953	609572	1	4	KNOWN	0.912292432	-1.069164886	0.156872454	3	NA
ENSDARG00000015495	klf3	ENSDARG00000015495	100.4124547	2.435540038	2.843126217	4.202366835	0.017773873	0.005844728	0.00073396	X30 - X0_X3 - X0_X7 - X0	Kruppel-like factor 3 (basic) [Source:ZFIN;Acc:ZDB-GENE-011116-1]	1	17336041	17356958	-1	2	KNOWN	-0.342885493	-0.783451046	1.126336539	5	NA
ENSDARG00000015543	s100a1	ENSDARG00000015543	8.509913607	4.393039238	11.35983865	17.77003586	0.012859137	0.000377722	7.24E-05	X30 - X0_X3 - X0_X7 - X0	S100 calcium binding protein A1 [Source:ZFIN;Acc:ZDB-GENE-040916-1]	16	31645856	31647506	-1	2	KNOWN	0.02773127	-1.01357721	0.985845939	4	NA
ENSDARG00000015557	zgc:100829	ENSDARG00000015557	315.5900886	2.006349958	9.760575095	7.558149051	0.002431914	2.99E-07	8.11E-07	X30 - X0_X3 - X0_X7 - X0	zgc:100829 [Source:ZFIN;Acc:ZDB-GENE-040801-54]	21	28141463	28188472	1	4	KNOWN	0.830581544	-1.109985471	0.279403927	3	NA
ENSDARG00000015607	CR388152.1	ENSDARG00000015607	7.696339971	10.69011005	6.14041266	13.66958458	0.001297279	0.005945341	0.000386603	X30 - X0_X3 - X0_X7 - X0	Uncharacterized protein [Source:UniProtKB/TrEMBL;Acc:E7F180]	7	6911187	7104257	-1	1	NOVEL	-1.061847675	0.138037547	0.923810127	8	NA
ENSDARG00000015623	cecr1b	ENSDARG00000015623	93.40208001	2.352383194	12.163454	9.36537178	0.020871749	5.09E-06	1.39E-05	X30 - X0_X3 - X0_X7 - X0	cat eye syndrome chromosome region, candidate 1b [Source:ZFIN;Acc:ZDB-GENE-041210-77]	4	5098801	5113377	-1	2	KNOWN	0.831599075	-1.109580651	0.277981576	3	NA
ENSDARG00000015707	dvl3a	ENSDARG00000015707	301.0034306	1.636579718	3.222846332	2.608985896	0.000532447	9.16E-07	4.07E-06	X30 - X0_X3 - X0_X7 - X0	dishevelled, dsh homolog 3a (Drosophila) [Source:ZFIN;Acc:ZDB-GENE-010319-1]	2	9490950	9532978	-1	1	KNOWN	0.916881961	-1.066302479	0.149420518	3	NA
ENSDARG00000015732	CR391963.1	ENSDARG00000015732	543.9413882	-1.205398792	-2.072771844	-1.680860261	0.04807926	1.12E-05	0.000127119	X30 - X0_X3 - X0_X7 - X0	Uncharacterized protein [Source:UniProtKB/TrEMBL;Acc:E7FCM1]	25	19379512	19396607	1	1	KNOWN	-0.966398291	1.030516017	-0.064117726	1	NA
ENSDARG00000015759	tspan7	ENSDARG00000015759	634.4907803	1.380815672	3.180654985	2.442117367	0.00447752	5.77E-07	3.67E-06	X30 - X0_X3 - X0_X7 - X0	tetraspanin 7 [Source:ZFIN;Acc:ZDB-GENE-030131-5435]	14	43002971	43011885	-1	2	KNOWN	0.93522425	-1.054141495	0.118917245	2	NA
ENSDARG00000015765	iah1	ENSDARG00000015765	91.37126554	1.837423075	5.992676143	3.75866915	0.013270541	4.63E-06	5.48E-05	X30 - X0_X3 - X0_X7 - X0	isoamyl acetate-hydrolyzing esterase 1 homolog (S. cerevisiae) [Source:ZFIN;Acc:ZDB-GENE-041008-186]	17	35410883	35414504	1	2	KNOWN	1.024123047	-0.97399116	-0.050131887	2	NA
ENSDARG00000015775	gap43	ENSDARG00000015775	4069.185035	4.248579825	27.85873817	19.49820486	3.64E-05	8.68E-08	1.98E-07	X30 - X0_X3 - X0_X7 - X0	growth associated protein 43 [Source:ZFIN;Acc:ZDB-GENE-990415-87]	Zv9_NA963	1	14235	1	1	KNOWN	0.890195031	-1.082015568	0.191820536	3	NA
ENSDARG00000015797	mmp13b	ENSDARG00000015797	429.511243	17.16325573	44.91184177	72.42130982	3.09E-05	1.91E-06	7.50E-07	X30 - X0_X3 - X0_X7 - X0	matrix metalloproteinase 13b [Source:ZFIN;Acc:ZDB-GENE-030131-6152]	15	32039949	32048776	1	1	KNOWN	0.002884855	-1.001439307	0.998554451	4	NA
ENSDARG00000015862	rpl5b	ENSDARG00000015862	9075.116081	1.608122885	3.164402531	2.725667902	0.001416891	2.42E-06	6.98E-06	X30 - X0_X3 - X0_X7 - X0	ribosomal protein L5b [Source:ZFIN;Acc:ZDB-GENE-040625-93]	6	28800390	28811189	1	2	KNOWN	0.828734595	-1.110714358	0.281979763	3	NA
ENSDARG00000015865	trim25	ENSDARG00000015865	626.3847747	1.855127031	2.398129404	2.691318271	0.00245613	0.000198063	8.09E-05	X30 - X0_X3 - X0_X7 - X0	tripartite motif-containing 25 [Source:ZFIN;Acc:ZDB-GENE-040426-797]	6	19509769	19522065	1	3	KNOWN	0.196269566	-1.083583256	0.88731369	4	NA
ENSDARG00000015887	b2ml	ENSDARG00000015887	4388.593583	1.342604381	1.372708418	1.665032705	0.018229688	0.011383	0.000653039	X30 - X0_X3 - X0_X7 - X0	beta-2-microglobulin, like [Source:ZFIN;Acc:ZDB-GENE-040426-2136]	8	53210637	53219002	1	3	KNOWN	-0.490770727	-0.659798635	1.150569361	5	NA
ENSDARG00000015902	stat6	ENSDARG00000015902	176.6356343	2.276912123	5.645441034	4.200320451	0.000198129	6.00E-07	2.67E-06	X30 - X0_X3 - X0_X7 - X0	signal transducer and activator of transcription 6, interleukin-4 induced [Source:ZFIN;Acc:ZDB-GENE-030131-9359]	23	27319750	27363817	-1	5	KNOWN	0.949485972	-1.043827595	0.094341623	2	NA
ENSDARG00000015911	mcm2	ENSDARG00000015911	383.9822996	8.710398995	39.65914436	26.43720836	1.42E-06	2.30E-08	5.46E-08	X30 - X0_X3 - X0_X7 - X0	MCM2 minichromosome maintenance deficient 2, mitotin (S. cerevisiae) [Source:ZFIN;Acc:ZDB-GENE-020419-24]	Zv9_NA237	11389	31977	-1	3	KNOWN	0.948138063	-1.044836637	0.096698574	2	Yes
ENSDARG00000015930	rwdd1	ENSDARG00000015930	875.3845477	1.195794055	2.294091741	1.502229332	0.041414165	2.11E-06	0.000362586	X30 - X0_X3 - X0_X7 - X0	RWD domain containing 1 [Source:ZFIN;Acc:ZDB-GENE-040718-270]	16	34512024	34518940	-1	3	KNOWN	1.111703157	-0.826197778	-0.28550538	2	NA
ENSDARG00000015947	matn4	ENSDARG00000015947	114.8588927	2.983950956	2.166360898	3.884725649	0.000159865	0.001769398	2.76E-05	X30 - X0_X3 - X0_X7 - X0	matrilin 4 [Source:ZFIN;Acc:ZDB-GENE-050208-64]	6	52742715	52798860	1	7	KNOWN	-0.983479558	-0.032260192	1.01573975	8	NA
ENSDARG00000015964	zgc:153311	ENSDARG00000015964	80.26077252	4.539040975	10.5109094	10.43336571	0.025302146	0.000580669	0.000620094	X30 - X0_X3 - X0_X7 - X0	zgc:153311 [Source:ZFIN;Acc:ZDB-GENE-060825-194]	6	30174749	30175753	-1	1	KNOWN	0.588631242	-1.15462658	0.565995338	4	NA
ENSDARG00000015998	wdhd1	ENSDARG00000015998	130.4213067	5.51510642	31.51457003	19.45131935	0.002025647	5.88E-06	2.27E-05	X30 - X0_X3 - X0_X7 - X0	WD repeat and HMG-box DNA binding protein 1 [Source:ZFIN;Acc:ZDB-GENE-030131-1665]	17	14991018	15030636	-1	5	KNOWN	0.975144107	-1.023128286	0.047984179	2	NA
ENSDARG00000016022	zic5	ENSDARG00000016022	170.5648768	2.098345493	2.14362878	2.281185149	0.000106069	8.68E-05	4.70E-05	X30 - X0_X3 - X0_X7 - X0	zic family member 5 (odd-paired homolog, Drosophila) [Source:ZFIN;Acc:ZDB-GENE-040622-1]	9	32307416	32347632	-1	2	KNOWN	-0.323012469	-0.798570433	1.121582903	5	NA
ENSDARG00000016062	ZC3H12A (1 of 2)	ENSDARG00000016062	51.12366388	1.558706596	3.901130383	3.260580791	0.015534682	4.13E-06	1.38E-05	X30 - X0_X3 - X0_X7 - X0	zinc finger CCCH-type containing 12A [Source:HGNC Symbol;Acc:26259]	19	2881892	2903306	-1	2	KNOWN_BY_PROJECTION	0.821333779	-1.113559568	0.292225788	3	NA
ENSDARG00000016065	tlr3	ENSDARG00000016065	90.79560336	3.922626484	6.573542098	8.195972557	6.84E-06	4.41E-07	1.82E-07	X30 - X0_X3 - X0_X7 - X0	toll-like receptor 3 [Source:ZFIN;Acc:ZDB-GENE-040219-7]	1	16634839	16640122	1	2	KNOWN	0.158922714	-1.069944915	0.911022201	4	NA
ENSDARG00000016122	ptrhd1	ENSDARG00000016122	130.6694042	1.482984861	3.293291556	2.225837674	0.034335364	1.77E-05	0.000368185	X30 - X0_X3 - X0_X7 - X0	peptidyl-tRNA hydrolase domain containing 1 [Source:ZFIN;Acc:ZDB-GENE-081110-2]	20	36822220	36824610	-1	1	KNOWN	1.054135529	-0.935232823	-0.118902706	2	NA
ENSDARG00000016173	cct3	ENSDARG00000016173	5049.516436	1.176127309	2.138489813	1.554312942	0.037967305	1.88E-06	9.62E-05	X30 - X0_X3 - X0_X7 - X0	chaperonin containing TCP1, subunit 3 (gamma) [Source:ZFIN;Acc:ZDB-GENE-020419-5]	16	32712336	32724833	-1	4	KNOWN	1.063260799	-0.921639828	-0.141620971	2	NA
ENSDARG00000016188	SBNO2 (2 of 3)	ENSDARG00000016188	960.5796916	1.897365446	3.894487499	3.033206565	0.022898259	0.000373457	0.001422532	X30 - X0_X3 - X0_X7 - X0	strawberry notch homolog 2 (Drosophila) [Source:HGNC Symbol;Acc:29158]	22	17916317	17984407	-1	2	KNOWN_BY_PROJECTION	0.951182478	-1.042547075	0.091364597	2	NA
ENSDARG00000016457	irf9	ENSDARG00000016457	697.3321092	2.883125161	5.92289008	4.61798846	1.45E-05	3.07E-07	9.53E-07	X30 - X0_X3 - X0_X7 - X0	interferon regulatory factor 9 [Source:ZFIN;Acc:ZDB-GENE-040912-165]	12	14388841	14412927	1	5	KNOWN	0.949689972	-1.043674238	0.093984266	2	NA
ENSDARG00000016470	anxa5b	ENSDARG00000016470	966.3174953	2.626388904	9.690142378	8.056259817	0.001005614	1.88E-06	3.63E-06	X30 - X0_X3 - X0_X7 - X0	annexin A5b [Source:ZFIN;Acc:ZDB-GENE-030131-9076]	1	21428978	21439189	1	1	KNOWN	0.784001955	-1.126171054	0.342169099	3	NA
ENSDARG00000016484	dkc1	ENSDARG00000016484	728.9073039	1.388206254	4.830864117	2.679999063	0.042610471	1.19E-06	3.87E-05	X30 - X0_X3 - X0_X7 - X0	dyskeratosis congenita 1, dyskerin [Source:ZFIN;Acc:ZDB-GENE-031118-120]	21	42107788	42122249	1	2	KNOWN	1.072109785	-0.907451523	-0.164658262	2	NA
ENSDARG00000016505	apbb1ip	ENSDARG00000016505	126.8853824	4.282342178	17.91538651	12.64340207	0.000165492	3.47E-07	1.13E-06	X30 - X0_X3 - X0_X7 - X0	amyloid beta (A4) precursor protein-binding, family B, member 1 interacting protein [Source:ZFIN;Acc:ZDB-GENE-040426-1318]	24	6123408	6161601	-1	2	KNOWN	0.916660321	-1.066442315	0.149781993	3	NA
ENSDARG00000016514	gtf2h2	ENSDARG00000016514	274.7785643	1.393564432	2.211065614	1.701845522	0.002384759	4.67E-06	8.99E-05	X30 - X0_X3 - X0_X7 - X0	general transcription factor IIH, polypeptide 2 [Source:ZFIN;Acc:ZDB-GENE-030131-1959]	5	27865560	27877617	1	3	KNOWN	1.071199701	-0.908960802	-0.162238899	2	NA
ENSDARG00000016526	gata3	ENSDARG00000016526	34.27638202	2.014161838	2.698033628	4.178164767	0.04718119	0.006777675	0.000496998	X30 - X0_X3 - X0_X7 - X0	GATA-binding protein 3 [Source:ZFIN;Acc:ZDB-GENE-990415-82]	4	24141643	24151643	-1	2	KNOWN	-0.239949659	-0.858195974	1.098145633	5	NA
ENSDARG00000016594	haus4	ENSDARG00000016594	45.71318161	6.167598722	40.97996985	23.4414957	0.002702605	1.84E-06	1.11E-05	X30 - X0_X3 - X0_X7 - X0	HAUS augmin-like complex, subunit 4 [Source:ZFIN;Acc:ZDB-GENE-040718-122]	5	1813138	1834555	1	1	KNOWN	1.002523712	-0.997457034	-0.005066678	2	NA
ENSDARG00000016607	echdc2	ENSDARG00000016607	87.16902915	3.372800186	12.15591718	7.745932085	0.000345705	5.50E-07	3.30E-06	X30 - X0_X3 - X0_X7 - X0	enoyl CoA hydratase domain containing 2 [Source:ZFIN;Acc:ZDB-GENE-030219-147]	20	16245544	16263709	-1	3	KNOWN	1.001395699	-0.998598432	-0.002797267	2	NA
ENSDARG00000016706	atic	ENSDARG00000016706	403.4549725	1.647369001	13.65370332	5.427055411	0.018113402	1.42E-07	3.92E-06	X30 - X0_X3 - X0_X7 - X0	5-aminoimidazole-4-carboxamide ribonucleotide formyltransferase/IMP cyclohydrolase [Source:ZFIN;Acc:ZDB-GENE-011212-4]	1	4326544	4393284	1	5	KNOWN	1.098623255	-0.857159329	-0.241463926	2	NA
ENSDARG00000016725	GADD45G (2 of 3)	ENSDARG00000016725	136.0825354	4.295692842	7.737872659	8.547569578	2.09E-05	1.20E-06	8.23E-07	X30 - X0_X3 - X0_X7 - X0	growth arrest and DNA-damage-inducible, gamma [Source:HGNC Symbol;Acc:4097]	21	19542802	19544436	1	2	KNOWN_BY_PROJECTION	0.388671103	-1.135983617	0.747312515	4	NA
ENSDARG00000016730	rfxank	ENSDARG00000016730	43.10216539	1.877884595	4.499896206	3.90955346	0.037429378	7.82E-05	0.000216061	X30 - X0_X3 - X0_X7 - X0	regulatory factor X-associated ankyrin-containing protein [Source:ZFIN;Acc:ZDB-GENE-050208-596]	22	18384417	18388922	-1	2	KNOWN	0.77849945	-1.127798271	0.349298821	3	NA
ENSDARG00000016733	psat1	ENSDARG00000016733	576.6577486	1.506663374	4.610189011	2.44171754	0.003395353	2.75E-07	1.46E-05	X30 - X0_X3 - X0_X7 - X0	phosphoserine aminotransferase 1 [Source:ZFIN;Acc:ZDB-GENE-030131-5723]	5	72352361	72365894	-1	1	KNOWN	1.103790941	-0.84555202	-0.258238922	2	NA
ENSDARG00000016744	fbn2b	ENSDARG00000016744	166.7633266	2.738133406	11.17734963	8.601642379	0.002464664	2.08E-06	5.91E-06	X30 - X0_X3 - X0_X7 - X0	fibrillin 2b [Source:ZFIN;Acc:ZDB-GENE-090112-3]	22	3998379	4039283	1	1	KNOWN	0.848928223	-1.102321511	0.253393288	3	NA
ENSDARG00000016769	sgta	ENSDARG00000016769	1392.358788	-1.236291556	-1.778503372	-1.775197677	0.018020776	2.89E-05	3.07E-05	X30 - X0_X3 - X0_X7 - X0	small glutamine-rich tetratricopeptide repeat (TPR)-containing, alpha [Source:ZFIN;Acc:ZDB-GENE-040704-72]	10	15410546	15434138	-1	1	KNOWN	-0.582638127	1.154684345	-0.572046218	1	NA
ENSDARG00000016774	PLEKHO2	ENSDARG00000016774	109.5010757	1.723732911	3.9063319	3.556236853	0.0100676	1.13E-05	2.17E-05	X30 - X0_X3 - X0_X7 - X0	pleckstrin homology domain containing, family O member 2 [Source:HGNC Symbol;Acc:30026]	7	14355571	14393447	1	1	KNOWN_BY_PROJECTION	0.720208452	-1.141753021	0.421544569	3	NA
ENSDARG00000016793	crybb1l2	ENSDARG00000016793	4.913647585	5.952123332	8.96143299	4.455781422	0.026584905	0.007224483	0.037628334	X30 - X0_X3 - X0_X7 - X0	crystallin, beta B1, like 2 [Source:ZFIN;Acc:ZDB-GENE-070822-18]	1	44895139	44902395	1	3	KNOWN	1.091605935	-0.219770206	-0.87183573	10	NA
ENSDARG00000016813	ccdc40	ENSDARG00000016813	42.54065871	2.638094179	3.219718556	3.602587834	0.000861191	0.000189203	8.18E-05	X30 - X0_X3 - X0_X7 - X0	coiled-coil domain containing 40 [Source:ZFIN;Acc:ZDB-GENE-060503-723]	6	19617982	19659252	-1	3	KNOWN	0.136419179	-1.061206244	0.924787065	4	NA
ENSDARG00000016837	glipr2l	ENSDARG00000016837	113.2471132	3.456085663	18.35993914	15.02480661	0.003982369	2.30E-06	4.89E-06	X30 - X0_X3 - X0_X7 - X0	GLI pathogenesis-related 2, like [Source:ZFIN;Acc:ZDB-GENE-041010-53]	16	29843228	29850422	1	1	KNOWN	0.777271546	-1.128153662	0.350882116	3	NA
ENSDARG00000016871	smarce1	ENSDARG00000016871	3252.444075	1.155334792	1.601950107	1.408796814	0.048887719	3.85E-05	0.000376192	X30 - X0_X3 - X0_X7 - X0	SWI/SNF related, matrix associated, actin dependent regulator of chromatin, subfamily e, member 1 [Source:ZFIN;Acc:ZDB-GENE-030131-967]	3	35071191	35080284	1	2	KNOWN	0.952099191	-1.041850221	0.089751031	2	NA
ENSDARG00000016903	wdr5	ENSDARG00000016903	1610.071345	1.251673886	1.887867724	1.641399147	0.013450484	1.37E-05	8.38E-05	X30 - X0_X3 - X0_X7 - X0	WD repeat domain 5 [Source:ZFIN;Acc:ZDB-GENE-040426-2082]	21	16871613	16887766	-1	3	KNOWN	0.917221944	-1.066087662	0.148865718	3	NA
ENSDARG00000016936	hmcn1	ENSDARG00000016936	383.9301892	1.484026106	1.361668554	2.746068553	0.011570194	0.038479676	2.23E-05	X30 - X0_X3 - X0_X7 - X0	hemicentin 1 [Source:ZFIN;Acc:ZDB-GENE-041014-322]	20	34181916	34317215	-1	3	KNOWN	-0.655333219	-0.495682514	1.151015733	5	NA
ENSDARG00000016939	itgb2	ENSDARG00000016939	1261.478971	2.812248858	7.816010288	6.794514134	3.28E-05	2.21E-07	3.70E-07	X30 - X0_X3 - X0_X7 - X0	integrin, beta 2 [Source:ZFIN;Acc:ZDB-GENE-110411-4]	9	46027572	46051049	-1	2	KNOWN	0.759658257	-1.132948972	0.373290715	3	NA
ENSDARG00000017128	MYOF	ENSDARG00000017128	345.0465407	2.551664258	9.650916961	9.959715407	0.011170242	2.02E-05	2.16E-05	X30 - X0_X3 - X0_X7 - X0	Uncharacterized protein [Source:UniProtKB/TrEMBL;Acc:E7EXL6]	13	29462452	29512846	1	1	KNOWN	0.540115366	-1.153916576	0.613801211	4	NA
ENSDARG00000017235	eif5a	ENSDARG00000017235	12443.82112	1.219809836	2.339997449	1.750074106	0.027239591	1.92E-06	4.08E-05	X30 - X0_X3 - X0_X7 - X0	eukaryotic translation initiation factor 5A [Source:ZFIN;Acc:ZDB-GENE-040426-2229]	24	27277902	27281947	-1	7	KNOWN	1.017271914	-0.981783281	-0.035488633	2	NA
ENSDARG00000017255	tmed1b	ENSDARG00000017255	242.3249392	1.432594102	3.936673224	2.487911035	0.034663153	5.16E-06	0.000119151	X30 - X0_X3 - X0_X7 - X0	transmembrane emp24 protein transport domain containing 1b [Source:ZFIN;Acc:ZDB-GENE-070112-1112]	1	59667310	59677129	-1	2	KNOWN	1.048070419	-0.943750943	-0.104319476	2	NA
ENSDARG00000017298	plek	ENSDARG00000017298	281.939574	3.218914804	17.79250162	8.757610154	0.000452856	3.02E-07	3.08E-06	X30 - X0_X3 - X0_X7 - X0	pleckstrin [Source:ZFIN;Acc:ZDB-GENE-040426-1506]	13	942599	957874	-1	2	KNOWN	1.069754203	-0.911333552	-0.158420651	2	NA
ENSDARG00000017315	larp7	ENSDARG00000017315	451.480959	1.348705093	2.384641084	2.071701508	0.010303896	7.31E-06	2.71E-05	X30 - X0_X3 - X0_X7 - X0	La ribonucleoprotein domain family, member 7 [Source:ZFIN;Acc:ZDB-GENE-030131-6896]	7	60051454	60065244	-1	2	KNOWN	0.846238615	-1.103494318	0.257255703	3	NA
ENSDARG00000017389	igfbp7	ENSDARG00000017389	197.4500884	2.415228015	3.091116481	3.245284407	0.0029175	0.000544135	0.000421058	X30 - X0_X3 - X0_X7 - X0	insulin-like growth factor binding protein 7 [Source:ZFIN;Acc:ZDB-GENE-040426-2423]	14	53720905	53731307	1	1	KNOWN	0.393891054	-1.136965409	0.743074355	4	NA
ENSDARG00000017445	eif3i	ENSDARG00000017445	4622.273382	1.247461344	2.034187051	1.785829539	0.01029677	3.84E-06	1.77E-05	X30 - X0_X3 - X0_X7 - X0	eukaryotic translation initiation factor 3, subunit I [Source:ZFIN;Acc:ZDB-GENE-040426-1922]	19	31067898	31078274	-1	1	KNOWN	0.857908595	-1.098278309	0.240369714	3	NA
ENSDARG00000017489	zgc:123068	ENSDARG00000017489	534.99637	7.568021973	6.1139409	9.535929101	0.000812693	0.001167046	0.000198704	X30 - X0_X3 - X0_X7 - X0	zgc:123068 [Source:ZFIN;Acc:ZDB-GENE-051030-98]	13	38003194	38005739	-1	3	KNOWN	-0.946398943	-0.099728779	1.046127722	8	NA
ENSDARG00000017504	CR457462.1	ENSDARG00000017504	187.0129525	4.009086521	18.73303292	10.1539682	0.000195662	3.52E-07	2.72E-06	X30 - X0_X3 - X0_X7 - X0	Uncharacterized protein [Source:UniProtKB/TrEMBL;Acc:F1R1Q1]	7	9529246	9569833	-1	1	KNOWN	1.050333501	-0.940617894	-0.109715606	2	NA
ENSDARG00000017537	prkag3a	ENSDARG00000017537	512.9955151	-1.264864559	-1.911188257	-1.606744339	0.035929102	9.72E-05	0.000814775	X30 - X0_X3 - X0_X7 - X0	protein kinase, AMP-activated, gamma 3a non-catalytic subunit [Source:ZFIN;Acc:ZDB-GENE-091204-419]	1	5035245	5049192	1	6	KNOWN	-0.980145034	1.018737613	-0.038592579	1	NA
ENSDARG00000017636	RNF167	ENSDARG00000017636	527.5258332	-1.226819385	-1.342074961	-1.37500393	0.021001365	0.0027837	0.001743389	X30 - X0_X3 - X0_X7 - X0	ring finger protein 167 [Source:HGNC Symbol;Acc:24544]	5	70878514	70892288	-1	1	KNOWN_BY_PROJECTION	-0.352680032	1.128554591	-0.775874559	1	NA
ENSDARG00000017653	rgs13	ENSDARG00000017653	169.4737495	5.407184098	7.983306952	7.403741631	9.47E-05	1.70E-05	2.36E-05	X30 - X0_X3 - X0_X7 - X0	regulator of G-protein signaling 13 [Source:ZFIN;Acc:ZDB-GENE-070410-138]	2	6179990	6186663	-1	2	KNOWN	0.778344691	-1.127843217	0.349498526	3	NA
ENSDARG00000017659	sps2	ENSDARG00000017659	1617.59098	1.186030592	1.569026588	1.403592802	0.034686192	9.69E-05	0.000716001	X30 - X0_X3 - X0_X7 - X0	selenophosphate synthetase 2 [Source:ZFIN;Acc:ZDB-GENE-030327-5]	23	18731584	18739240	-1	1	KNOWN	0.951697151	-1.042156266	0.090459115	2	NA
ENSDARG00000017676	mmp2	ENSDARG00000017676	1562.818878	2.694247304	7.332023418	6.706725346	0.000804094	4.59E-06	7.39E-06	X30 - X0_X3 - X0_X7 - X0	matrix metalloproteinase 2 [Source:ZFIN;Acc:ZDB-GENE-030131-9123]	7	36864730	36887581	-1	1	KNOWN	0.69711171	-1.145754982	0.448643272	3	NA
ENSDARG00000017687	dnajc5gb	ENSDARG00000017687	128.6694993	1.564568566	4.071460988	2.939544151	0.035439929	1.22E-05	0.000105592	X30 - X0_X3 - X0_X7 - X0	DnaJ (Hsp40) homolog, subfamily C, member 5 gamma b [Source:ZFIN;Acc:ZDB-GENE-040426-1238]	17	6253923	6272240	-1	1	KNOWN	0.966168707	-1.030705137	0.064536429	2	NA
ENSDARG00000017728	zgc:86841	ENSDARG00000017728	466.3581726	1.326537667	2.522710785	1.754111053	0.033944726	2.05E-05	0.000709247	X30 - X0_X3 - X0_X7 - X0	zgc:86841 [Source:ZFIN;Acc:ZDB-GENE-040718-430]	6	29420925	29428078	1	1	KNOWN	1.08049321	-0.892951606	-0.187541604	2	NA
ENSDARG00000017744	smc2	ENSDARG00000017744	383.949736	9.716017483	48.16184362	27.73327476	1.21E-06	2.00E-08	5.84E-08	X30 - X0_X3 - X0_X7 - X0	structural maintenance of chromosomes 2 [Source:ZFIN;Acc:ZDB-GENE-030131-105]	1	18277015	18304105	1	3	KNOWN	1.020237898	-0.978452136	-0.041785762	2	Yes
ENSDARG00000017748	arhgap29b	ENSDARG00000017748	241.8340521	1.47600561	3.147053851	2.686606087	0.040263438	3.72E-05	0.000112155	X30 - X0_X3 - X0_X7 - X0	Rho GTPase activating protein 29b [Source:ZFIN;Acc:ZDB-GENE-031010-44]	2	14949001	15018503	1	2	KNOWN	0.823164613	-1.112866853	0.28970224	3	NA
ENSDARG00000017794	sdr16c5b	ENSDARG00000017794	1035.080721	1.297319089	2.638826893	2.198477532	0.008872422	1.10E-06	4.98E-06	X30 - X0_X3 - X0_X7 - X0	short chain dehydrogenase/reductase family 16C, member 5b [Source:ZFIN;Acc:ZDB-GENE-040426-2861]	7	59944669	59965748	1	3	KNOWN	0.868583342	-1.093209142	0.224625801	3	NA
ENSDARG00000017860	rgs5b	ENSDARG00000017860	228.4610336	3.257346006	12.93267414	8.366945287	0.003587291	6.40E-06	3.56E-05	X30 - X0_X3 - X0_X7 - X0	regulator of G-protein signaling 5b [Source:ZFIN;Acc:ZDB-GENE-050417-359]	2	6590676	6593943	1	1	KNOWN	0.980746279	-1.018201286	0.037455008	2	NA
ENSDARG00000017891	tcp1	ENSDARG00000017891	4067.861817	1.245270368	2.37532653	1.680686327	0.021862991	2.31E-06	9.58E-05	X30 - X0_X3 - X0_X7 - X0	t-complex polypeptide 1 [Source:ZFIN;Acc:ZDB-GENE-990714-24]	23	2435272	2457630	1	1	KNOWN	1.067145339	-0.915542065	-0.151603274	2	NA
ENSDARG00000017905	casp3a	ENSDARG00000017905	1144.077262	2.844319772	4.8516165	6.32411112	5.31E-05	2.38E-06	8.03E-07	X30 - X0_X3 - X0_X7 - X0	caspase 3, apoptosis-related cysteine protease a [Source:ZFIN;Acc:ZDB-GENE-011210-1]	1	16269237	16278202	1	4	KNOWN	0.102057675	-1.047115266	0.945057591	4	NA
ENSDARG00000017953	tp73	ENSDARG00000017953	4.388642942	2.202572766	9.772408054	5.062850279	0.040707708	0.000180404	0.002148736	X30 - X0_X3 - X0_X7 - X0	tumor protein p73 [Source:ZFIN;Acc:ZDB-GENE-030814-2]	8	51108387	51195663	1	3	KNOWN	1.07083313	-0.909565341	-0.161267789	2	NA
ENSDARG00000018002	eci1	ENSDARG00000018002	317.2527548	1.384796652	3.43723783	2.519847131	0.01295067	1.23E-06	1.06E-05	X30 - X0_X3 - X0_X7 - X0	enoyl-CoA delta isomerase 1 [Source:ZFIN;Acc:ZDB-GENE-030131-6033]	3	27921229	27928790	1	1	KNOWN	0.962847183	-1.033414513	0.07056733	2	NA
ENSDARG00000018048	zgc:171704	ENSDARG00000018048	66.69126816	2.984446411	7.724679899	5.198076614	0.0020394	1.02E-05	7.37E-05	X30 - X0_X3 - X0_X7 - X0	zgc:171704 [Source:ZFIN;Acc:ZDB-GENE-070820-16]	16	31020444	31022467	1	1	KNOWN	1.021266547	-0.977281943	-0.043984604	2	NA
ENSDARG00000018077	rbp1b	ENSDARG00000018077	47.80658283	2.868406381	5.698882195	4.590185062	0.009146103	0.000160547	0.000510592	X30 - X0_X3 - X0_X7 - X0	retinol binding protein 1b, cellular [Source:ZFIN;Acc:ZDB-GENE-050421-2]	2	38732533	38740800	-1	1	KNOWN	0.920629218	-1.063913302	0.143284084	3	NA
ENSDARG00000018118	tk1	ENSDARG00000018118	6.203529614	5.308431704	10.3523025	8.283346397	0.007813572	0.000493168	0.00140595	X30 - X0_X3 - X0_X7 - X0	thymidine kinase 1, soluble [Source:ZFIN;Acc:ZDB-GENE-030131-5801]	11	45718831	45908399	-1	1	KNOWN	0.935113456	-1.054218571	0.119105115	2	NA
ENSDARG00000018121	cenpj	ENSDARG00000018121	62.07662989	3.877511762	10.39694079	7.711515898	0.000178608	1.33E-06	4.47E-06	X30 - X0_X3 - X0_X7 - X0	centromere protein J [Source:ZFIN;Acc:ZDB-GENE-030131-6323]	9	30605117	30613216	-1	2	KNOWN	0.936442186	-1.053291195	0.116849009	2	NA
ENSDARG00000018159	ano10b	ENSDARG00000018159	193.7678933	1.481319262	2.564547503	2.88954892	0.006312849	1.31E-05	5.49E-06	X30 - X0_X3 - X0_X7 - X0	anoctamin 10b [Source:ZFIN;Acc:ZDB-GENE-061013-169]	25	13960282	13990237	-1	5	KNOWN	0.342770581	-1.126310024	0.783539443	4	NA
ENSDARG00000018165	depdc1a	ENSDARG00000018165	89.82251196	5.71026784	21.19094971	16.01378273	2.91E-05	1.52E-07	3.39E-07	X30 - X0_X3 - X0_X7 - X0	DEP domain containing 1a [Source:ZFIN;Acc:ZDB-GENE-030131-9827]	8	17232216	17244973	-1	1	KNOWN	0.873792153	-1.090628021	0.216835868	3	NA
ENSDARG00000018283	cyba	ENSDARG00000018283	520.6772139	1.825039307	7.24602371	4.848049985	0.000608166	1.01E-07	5.07E-07	X30 - X0_X3 - X0_X7 - X0	cytochrome b-245, alpha polypeptide [Source:ZFIN;Acc:ZDB-GENE-040426-1526]	18	30961901	30964342	1	4	KNOWN	0.959443369	-1.036139977	0.076696607	2	NA
ENSDARG00000018303	etv4	ENSDARG00000018303	274.9304572	2.103769547	3.984728418	3.41001248	0.002322853	2.23E-05	6.32E-05	X30 - X0_X3 - X0_X7 - X0	ets variant gene 4 [Source:ZFIN;Acc:ZDB-GENE-990415-71]	12	29107126	29139725	1	3	KNOWN	0.849218278	-1.102193995	0.252975717	3	NA
ENSDARG00000018328	rhoad	ENSDARG00000018328	476.1321411	1.456433756	4.091075254	2.570807387	0.017480558	1.96E-06	4.02E-05	X30 - X0_X3 - X0_X7 - X0	ras homolog gene family, member Ad [Source:ZFIN;Acc:ZDB-GENE-040718-144]	8	28408257	28477272	1	2	KNOWN	1.047219106	-0.944915984	-0.102303122	2	NA
ENSDARG00000018334	rpl35	ENSDARG00000018334	8046.998021	1.459648596	3.012731783	2.399184579	0.002587725	1.40E-06	7.83E-06	X30 - X0_X3 - X0_X7 - X0	ribosomal protein L35 [Source:ZFIN;Acc:ZDB-GENE-020419-2]	21	5737709	5745539	1	1	KNOWN	0.923279268	-1.062194831	0.138915563	3	NA
ENSDARG00000018404	krt18	ENSDARG00000018404	2734.238786	3.124076617	22.48878739	10.36724046	0.000882409	4.54E-07	3.91E-06	X30 - X0_X3 - X0_X7 - X0	keratin 18 [Source:ZFIN;Acc:ZDB-GENE-030411-6]	23	10454077	10457982	1	4	KNOWN	1.072686919	-0.906488135	-0.166198783	2	NA
ENSDARG00000018461	zgc:56095	ENSDARG00000018461	567.3216772	1.391692304	1.777528588	1.751791161	0.00248611	5.75E-05	6.90E-05	X30 - X0_X3 - X0_X7 - X0	zgc:56095 [Source:ZFIN;Acc:ZDB-GENE-040426-1948]	24	7854910	7859867	1	1	KNOWN	0.635977528	-1.152644045	0.516666517	3	NA
ENSDARG00000018491	pdia4	ENSDARG00000018491	1257.497304	1.385906102	4.583259589	2.614780024	0.034056167	1.46E-06	4.10E-05	X30 - X0_X3 - X0_X7 - X0	protein disulfide isomerase associated 4 [Source:ZFIN;Acc:ZDB-GENE-030131-5493]	24	17883783	17890563	1	4	KNOWN	1.067626998	-0.914772086	-0.152854911	2	NA
ENSDARG00000018516	stk38b	ENSDARG00000018516	48.95232014	1.985027304	5.455011872	4.588116898	0.00706684	6.00E-06	1.58E-05	X30 - X0_X3 - X0_X7 - X0	serine/threonine kinase 38b [Source:ZFIN;Acc:ZDB-GENE-081031-2]	22	863868	878841	1	2	KNOWN	0.800487116	-1.120948271	0.320461154	3	NA
ENSDARG00000018553	ifih1	ENSDARG00000018553	95.70256836	2.089977881	2.999793572	3.104467879	0.036638852	0.002697335	0.002358235	X30 - X0_X3 - X0_X7 - X0	interferon induced with helicase C domain 1 [Source:ZFIN;Acc:ZDB-GENE-081104-438]	9	52494636	52563659	1	2	KNOWN	0.481003682	-1.149609422	0.66860574	4	NA
ENSDARG00000018566	CU302436.1	ENSDARG00000018566	336.9870904	8.195281928	55.9235197	50.8956276	0.000383853	9.03E-07	1.29E-06	X30 - X0_X3 - X0_X7 - X0	Uncharacterized protein [Source:UniProtKB/TrEMBL;Acc:E7F1L7]	25	36081303	36101828	1	1	KNOWN	0.670551224	-1.149382971	0.478831747	3	NA
ENSDARG00000018569	tnfrsf1a	ENSDARG00000018569	524.7618882	2.219811321	7.003565025	5.162703201	0.001790734	2.19E-06	8.50E-06	X30 - X0_X3 - X0_X7 - X0	tumor necrosis factor receptor superfamily, member 1a [Source:ZFIN;Acc:ZDB-GENE-040426-2252]	16	19123791	19134140	-1	1	KNOWN	0.915151198	-1.06739009	0.152238892	3	NA
ENSDARG00000018623	rad54l	ENSDARG00000018623	60.89803915	5.30843204	32.2602817	14.78921758	0.000875867	4.51E-07	6.34E-06	X30 - X0_X3 - X0_X7 - X0	RAD54-like (S. cerevisiae) [Source:ZFIN;Acc:ZDB-GENE-040426-968]	6	3280974	3298674	1	1	KNOWN	1.083070734	-0.88826053	-0.194810204	2	NA
ENSDARG00000018688	elk3	ENSDARG00000018688	218.973708	1.632469428	5.071171382	4.034133605	0.033643975	1.18E-05	3.95E-05	X30 - X0_X3 - X0_X7 - X0	ELK3, ETS-domain protein [Source:ZFIN;Acc:ZDB-GENE-030716-2]	4	6747634	6783981	1	2	KNOWN	0.845802622	-1.103682806	0.257880184	3	NA
ENSDARG00000018693	cdh2	ENSDARG00000018693	6270.218659	1.371655803	2.914607883	2.143564102	0.00359636	6.74E-07	7.57E-06	X30 - X0_X3 - X0_X7 - X0	cadherin 2, neuronal [Source:ZFIN;Acc:ZDB-GENE-990415-171]	20	17786020	17865155	1	2	KNOWN	0.999813181	-1.000186715	0.000373534	2	NA
ENSDARG00000018806	ctsc	ENSDARG00000018806	2649.14439	3.167188434	23.57951331	11.90068958	6.58E-05	4.70E-08	2.17E-07	X30 - X0_X3 - X0_X7 - X0	cathepsin C [Source:ZFIN;Acc:ZDB-GENE-030619-9]	15	42362040	42383557	-1	1	KNOWN	1.044479051	-0.948616863	-0.095862189	2	NA
ENSDARG00000018817	bdnf	ENSDARG00000018817	523.3811983	-1.312382134	-1.988640057	-2.163761756	0.048068843	0.000236077	9.36E-05	X30 - X0_X3 - X0_X7 - X0	brain-derived neurotrophic factor [Source:ZFIN;Acc:ZDB-GENE-000412-1]	7	33259493	33276180	-1	5	KNOWN	-0.371542478	1.132590726	-0.761048247	1	NA
ENSDARG00000018856	dclk1a	ENSDARG00000018856	4186.878207	-1.233399825	-2.121626607	-2.046708127	0.041978144	1.76E-05	2.46E-05	X30 - X0_X3 - X0_X7 - X0	doublecortin-like kinase 1a [Source:ZFIN;Acc:ZDB-GENE-061013-124]	10	35765475	35895175	-1	8	KNOWN	-0.651719931	1.1513573	-0.499637368	1	NA
ENSDARG00000018891	rnaseh2a	ENSDARG00000018891	291.9851787	1.370710685	2.227009714	1.610545599	0.003968915	5.24E-06	0.000238409	X30 - X0_X3 - X0_X7 - X0	ribonuclease H2, subunit A [Source:ZFIN;Acc:ZDB-GENE-040426-976]	1	52206821	52214585	-1	2	KNOWN	1.111338887	-0.827136584	-0.284202303	2	NA
ENSDARG00000018903	aimp2	ENSDARG00000018903	553.2674799	1.20418638	1.980889215	1.458032326	0.032265076	6.98E-06	0.000512618	X30 - X0_X3 - X0_X7 - X0	aminoacyl tRNA synthetase complex-interacting multifunctional protein 2 [Source:ZFIN;Acc:ZDB-GENE-040426-2652]	3	61536570	61544471	1	1	KNOWN	1.093795998	-0.867378476	-0.226417522	2	NA
ENSDARG00000018961	gtpbp4	ENSDARG00000018961	3967.52933	1.296320386	1.357659671	1.788727744	0.011591541	0.004638074	6.60E-05	X30 - X0_X3 - X0_X7 - X0	GTP binding protein 4 [Source:ZFIN;Acc:ZDB-GENE-030131-5982]	2	42462491	42476393	-1	2	KNOWN	-0.459274192	-0.687859723	1.147133915	5	NA
ENSDARG00000018971	b3gnt5a	ENSDARG00000018971	93.58323206	4.602731206	22.99740042	19.05193106	0.000831523	9.24E-07	1.81E-06	X30 - X0_X3 - X0_X7 - X0	UDP-GlcNAc:betaGal beta-1,3-N-acetylglucosaminyltransferase 5a [Source:ZFIN;Acc:ZDB-GENE-030131-8470]	11	10605252	10614375	1	2	KNOWN	0.7689497	-1.130489105	0.361539405	3	NA
ENSDARG00000018985	gatsl2	ENSDARG00000018985	2421.732739	-1.221971128	-1.62541015	-1.492041604	0.04796357	0.000315857	0.001164034	X30 - X0_X3 - X0_X7 - X0	GATS protein-like 2 [Source:ZFIN;Acc:ZDB-GENE-030131-5505]	5	64424434	64466432	1	1	KNOWN	-0.870550686	1.092242715	-0.221692029	1	NA
ENSDARG00000019098	cd82a	ENSDARG00000019098	1790.669526	1.511136139	2.945139769	2.0426015	0.00157816	1.75E-06	3.61E-05	X30 - X0_X3 - X0_X7 - X0	CD82 antigen, a [Source:ZFIN;Acc:ZDB-GENE-030131-2818]	7	27835119	27863990	1	2	KNOWN	1.074332236	-0.903714458	-0.170617778	2	NA
ENSDARG00000019128	tpm4b	ENSDARG00000019128	195.7968703	2.417067955	10.3603812	9.127521178	0.00553492	3.49E-06	6.07E-06	X30 - X0_X3 - X0_X7 - X0	tropomyosin 4b [Source:ZFIN;Acc:ZDB-GENE-030131-2964]	2	55995983	56012592	-1	1	KNOWN	0.715515231	-1.142632424	0.427117193	3	NA
ENSDARG00000019156	haus5	ENSDARG00000019156	62.52742118	6.439022125	31.48938888	20.62406557	0.000359521	4.84E-07	1.92E-06	X30 - X0_X3 - X0_X7 - X0	HAUS augmin-like complex, subunit 5 [Source:ZFIN;Acc:ZDB-GENE-041114-150]	8	21433919	21452847	-1	2	KNOWN	0.953040577	-1.04113099	0.088090414	2	NA
ENSDARG00000019181	rpsa	ENSDARG00000019181	22973.24225	1.399335284	2.99459115	2.163004123	0.005173372	1.37E-06	1.82E-05	X30 - X0_X3 - X0_X7 - X0	ribosomal protein SA [Source:ZFIN;Acc:ZDB-GENE-040426-811]	6	7628873	7637147	-1	2	KNOWN	1.013885447	-0.985510614	-0.028374833	2	NA
ENSDARG00000019207	abo	ENSDARG00000019207	20.46616429	6.024042349	8.333365149	15.86190906	0.009344338	0.002538682	0.000237506	X30 - X0_X3 - X0_X7 - X0	ABO blood group (transferase A, alpha 1-3-N-acetylgalactosaminyltransferase; transferase B, alpha 1-3-galactosyltransferase) [Source:ZFIN;Acc:ZDB-GENE-081104-23]	5	26693988	26706393	-1	2	KNOWN	-0.338174518	-0.787065708	1.125240226	5	NA
ENSDARG00000019230	rpl7a	ENSDARG00000019230	16701.30867	1.56796694	3.248574008	2.709549116	0.001451429	1.56E-06	5.43E-06	X30 - X0_X3 - X0_X7 - X0	ribosomal protein L7a [Source:ZFIN;Acc:ZDB-GENE-031001-9]	5	34902042	34905589	-1	4	KNOWN	0.862209417	-1.096270997	0.23406158	3	NA
ENSDARG00000019307	dusp5	ENSDARG00000019307	1822.540861	-1.506434056	-2.210919882	-2.131551698	0.036498728	0.000899292	0.001112302	X30 - X0_X3 - X0_X7 - X0	dual specificity phosphatase 5 [Source:ZFIN;Acc:ZDB-GENE-010625-1]	22	32601001	32612547	-1	1	KNOWN	-0.677132206	1.14857782	-0.471445614	1	NA
ENSDARG00000019328	plxna4	ENSDARG00000019328	970.3948118	-1.244839407	-1.78373755	-1.546505664	0.029956984	7.12E-05	0.0005343	X30 - X0_X3 - X0_X7 - X0	plexin A4 [Source:ZFIN;Acc:ZDB-GENE-030131-4663]	4	14283321	14485844	-1	1	KNOWN	-0.957864774	1.037386777	-0.079522003	1	NA
ENSDARG00000019362	ptbp1a	ENSDARG00000019362	955.5462862	1.433754056	3.897308666	2.851230002	0.0034857	2.75E-07	1.81E-06	X30 - X0_X3 - X0_X7 - X0	polypyrimidine tract binding protein 1a [Source:ZFIN;Acc:ZDB-GENE-050522-492]	2	26436471	26448682	1	2	KNOWN	0.946170514	-1.046296404	0.100125891	2	NA
ENSDARG00000019507	mcm5	ENSDARG00000019507	410.7378005	8.456943954	54.71268342	29.33487159	1.01E-06	9.58E-09	2.56E-08	X30 - X0_X3 - X0_X7 - X0	MCM5 minichromosome maintenance deficient 5 (S. cerevisiae) [Source:ZFIN;Acc:ZDB-GENE-021209-1]	3	27023667	27035630	-1	1	KNOWN	1.030802946	-0.966049855	-0.064753091	2	Yes
ENSDARG00000019521	mpx	ENSDARG00000019521	117.120722	9.986647758	56.59043514	44.70254185	0.014137398	4.54E-05	0.000126563	X30 - X0_X3 - X0_X7 - X0	myeloid-specific peroxidase [Source:ZFIN;Acc:ZDB-GENE-030131-9460]	10	6807370	6814445	-1	3	KNOWN	0.805145032	-1.119375214	0.314230182	3	NA
ENSDARG00000019601	col12a1b	ENSDARG00000019601	100.7843484	3.212467969	6.891823263	9.964451373	0.001262508	2.06E-05	4.86E-06	X30 - X0_X3 - X0_X7 - X0	collagen, type XII, alpha 1b [Source:ZFIN;Acc:ZDB-GENE-120215-116]	20	49761926	49993603	-1	3	KNOWN	0.059825612	-1.02856974	0.968744128	4	NA
ENSDARG00000019741	im:7162084	ENSDARG00000019741	9.473946984	3.706115678	27.84149639	5.709626078	0.003355928	7.01E-07	0.000464819	X30 - X0_X3 - X0_X7 - X0	im:7162084 [Source:ZFIN;Acc:ZDB-GENE-080917-47]	3	30305087	30309514	-1	1	KNOWN	1.151466324	-0.650526067	-0.500940256	2	NA
ENSDARG00000019778	rps6	ENSDARG00000019778	12733.87731	1.591659315	3.238679929	2.597373459	0.001033972	1.38E-06	6.45E-06	X30 - X0_X3 - X0_X7 - X0	ribosomal protein S6 [Source:ZFIN;Acc:ZDB-GENE-040801-8]	1	45499247	45505056	-1	1	KNOWN	0.918783291	-1.065096151	0.146312861	3	NA
ENSDARG00000019810	nfe2l3	ENSDARG00000019810	988.7407153	1.329071505	2.368975939	2.10116634	0.04012378	5.27E-05	0.000159404	X30 - X0_X3 - X0_X7 - X0	nuclear factor (erythroid-derived 2)-like 3 [Source:ZFIN;Acc:ZDB-GENE-040426-2334]	19	20278282	20287096	-1	1	KNOWN	0.807310797	-1.118628795	0.311317999	3	NA
ENSDARG00000019815	fn1	ENSDARG00000019815	1570.503846	4.908129569	25.97752957	30.58867034	2.20E-05	1.02E-07	8.17E-08	X30 - X0_X3 - X0_X7 - X0	fibronectin 1 [Source:ZFIN;Acc:ZDB-GENE-000426-1]	9	15638532	15700871	-1	3	KNOWN	0.400705449	-1.138210047	0.737504598	4	NA
ENSDARG00000019861	fgl2	ENSDARG00000019861	280.7740458	3.55297282	7.813438979	4.666593353	0.000813283	1.65E-05	0.000188852	X30 - X0_X3 - X0_X7 - X0	fibrinogen-like 2 [Source:ZFIN;Acc:ZDB-GENE-030131-9506]	4	19114384	19117654	-1	1	KNOWN	1.117436849	-0.810712803	-0.306724046	2	NA
ENSDARG00000020007	col1a2	ENSDARG00000020007	1122.53551	6.743274365	12.122748	21.58602245	3.76E-05	4.77E-06	1.14E-06	X30 - X0_X3 - X0_X7 - X0	collagen, type I, alpha 2 [Source:ZFIN;Acc:ZDB-GENE-030131-8415]	19	41943847	41963606	1	2	KNOWN	-0.181153847	-0.89704014	1.078193986	5	NA
ENSDARG00000020079	neil3	ENSDARG00000020079	79.55467929	2.249228335	6.745368536	6.97369098	0.04796357	8.04E-05	6.92E-05	X30 - X0_X3 - X0_X7 - X0	nei endonuclease VIII-like 3 (E. coli) [Source:ZFIN;Acc:ZDB-GENE-041114-18]	14	37635215	37648796	1	3	KNOWN	0.533969981	-1.153639965	0.619669984	4	NA
ENSDARG00000020103	calrl	ENSDARG00000020103	1685.936684	1.7710172	10.55184839	4.875053426	0.008011676	3.72E-07	6.90E-06	X30 - X0_X3 - X0_X7 - X0	calreticulin like [Source:ZFIN;Acc:ZDB-GENE-030131-9907]	2	55840231	55854933	1	1	KNOWN	1.082289666	-0.889694411	-0.192595255	2	NA
ENSDARG00000020153	rps18	ENSDARG00000020153	10118.27447	1.469215493	2.748487759	2.273493923	0.00315431	3.50E-06	1.68E-05	X30 - X0_X3 - X0_X7 - X0	ribosomal protein S18 [Source:ZFIN;Acc:ZDB-GENE-020419-20]	19	18309520	18318937	-1	6	KNOWN	0.904269202	-1.074005092	0.169735889	3	NA
ENSDARG00000020164	efnb2a	ENSDARG00000020164	2561.145079	1.675187819	1.90236652	2.114474722	0.001173089	0.000289538	9.38E-05	X30 - X0_X3 - X0_X7 - X0	ephrin B2a [Source:ZFIN;Acc:ZDB-GENE-990415-67]	9	27137159	27160650	1	3	KNOWN	0.022866671	-1.011237235	0.988370564	4	NA
ENSDARG00000020192	cdc20	ENSDARG00000020192	233.8850253	2.678010732	14.98290828	8.125702037	7.44E-05	2.91E-08	1.74E-07	X30 - X0_X3 - X0_X7 - X0	cell division cycle 20 homolog [Source:ZFIN;Acc:ZDB-GENE-040426-2044]	2	19218016	19234798	1	3	KNOWN	1.035920035	-0.959720429	-0.076199606	2	NA
ENSDARG00000020197	rpl5a	ENSDARG00000020197	9321.756326	1.490200454	3.394767228	2.781448488	0.004631942	1.86E-06	6.93E-06	X30 - X0_X3 - X0_X7 - X0	ribosomal protein L5a [Source:ZFIN;Acc:ZDB-GENE-030131-5161]	2	10478581	10494926	-1	1	KNOWN	0.863308549	-1.095750474	0.232441925	3	NA
ENSDARG00000020219	dld	ENSDARG00000020219	141.0846313	3.958261487	10.14870997	8.354470828	5.67E-05	5.80E-07	1.23E-06	X30 - X0_X3 - X0_X7 - X0	deltaD [Source:ZFIN;Acc:ZDB-GENE-990415-47]	13	5753087	5759318	-1	1	KNOWN	0.835639963	-1.107949962	0.272309999	3	NA
ENSDARG00000020286	zgc:123107	ENSDARG00000020286	132.6212255	6.338075671	19.36451804	16.67740955	7.59E-05	1.03E-06	1.81E-06	X30 - X0_X3 - X0_X7 - X0	zgc:123107 [Source:ZFIN;Acc:ZDB-GENE-051113-192]	4	61887203	61893205	-1	2	KNOWN	0.761578047	-1.132453283	0.370875235	3	NA
ENSDARG00000020289	pif1	ENSDARG00000020289	36.12212715	14.32989213	76.5433583	53.09851751	0.002356136	6.61E-06	2.04E-05	X30 - X0_X3 - X0_X7 - X0	PIF1 5'-to-3' DNA helicase homolog (S. cerevisiae) [Source:ZFIN;Acc:ZDB-GENE-030131-4928]	2	16918145	16936147	-1	2	KNOWN	0.908753945	-1.071324864	0.162570919	3	NA
ENSDARG00000020450	cacng8a	ENSDARG00000020450	97.97114573	-1.233454107	-2.311244556	-2.026148626	0.047489379	1.31E-05	4.08E-05	X30 - X0_X3 - X0_X7 - X0	calcium channel, voltage-dependent, gamma subunit 8a [Source:ZFIN;Acc:ZDB-GENE-050417-239]	19	10435823	10452501	-1	4	KNOWN	-0.813476544	1.116450844	-0.302974299	1	NA
ENSDARG00000020473	hddc3	ENSDARG00000020473	150.9428415	1.414078534	2.055451299	1.876168521	0.008169962	5.88E-05	0.000170518	X30 - X0_X3 - X0_X7 - X0	HD domain containing 3 [Source:ZFIN;Acc:ZDB-GENE-050417-377]	7	51852844	51854956	1	1	KNOWN	0.826652865	-1.11152682	0.284873954	3	NA
ENSDARG00000020504	h3f3a	ENSDARG00000020504	3375.209657	1.334706375	2.168517057	1.984172076	0.002294817	2.24E-06	5.49E-06	X30 - X0_X3 - X0_X7 - X0	H3 histone, family 3A [Source:ZFIN;Acc:ZDB-GENE-040426-1928]	3	45814483	45816236	-1	3	KNOWN	0.774863876	-1.128842405	0.353978529	3	NA
ENSDARG00000020609	snap25a	ENSDARG00000020609	24897.51941	-1.22006821	-1.891975892	-1.810696434	0.037311942	2.63E-05	4.51E-05	X30 - X0_X3 - X0_X7 - X0	synaptosome-associated protein 25a [Source:ZFIN;Acc:ZDB-GENE-980526-468]	20	34937677	34980838	1	4	KNOWN	-0.684613188	1.147588276	-0.462975088	1	NA
ENSDARG00000020623	baxa	ENSDARG00000020623	744.9197738	1.266757077	3.139146731	2.020327584	0.008976257	1.68E-07	5.25E-06	X30 - X0_X3 - X0_X7 - X0	bcl2-associated X protein, a [Source:ZFIN;Acc:ZDB-GENE-000511-6]	3	37771271	37780655	-1	2	KNOWN	0.291660938	-1.401689458	-0.72017591	9	NA
ENSDARG00000020676	dpp3	ENSDARG00000020676	1179.035472	1.21223569	2.295040327	1.652237117	0.015388242	7.89E-07	2.97E-05	X30 - X0_X3 - X0_X7 - X0	dipeptidylpeptidase 3 [Source:ZFIN;Acc:ZDB-GENE-030131-1247]	21	26730944	26749066	1	3	KNOWN	1.056273516	-0.932135142	-0.124138374	2	NA
ENSDARG00000020702	ODF2 (2 of 2)	ENSDARG00000020702	95.40101029	1.768639742	3.905236484	3.002914041	0.005578937	9.92E-06	5.50E-05	X30 - X0_X3 - X0_X7 - X0	outer dense fiber of sperm tails 2 [Source:HGNC Symbol;Acc:8114]	8	31864222	31879576	1	5	KNOWN_BY_PROJECTION	0.944419922	-1.047582239	0.103162318	2	NA
ENSDARG00000020711	rrm2	ENSDARG00000020711	217.7044163	5.931746577	53.54496335	17.27759311	0.00443858	3.22E-06	6.24E-05	X30 - X0_X3 - X0_X7 - X0	ribonucleotide reductase M2 polypeptide [Source:ZFIN;Acc:ZDB-GENE-990415-25]	20	29518377	29525282	-1	5	KNOWN	1.941800677	-0.640378695	-0.025066123	11	NA
ENSDARG00000020742	naga	ENSDARG00000020742	283.1951166	1.505779361	4.057222343	3.039178777	0.027145477	7.09E-06	4.40E-05	X30 - X0_X3 - X0_X7 - X0	N-acetylgalactosaminidase, alpha [Source:ZFIN;Acc:ZDB-GENE-051113-256]	4	756777	762909	-1	1	KNOWN	0.926393373	-1.06014433	0.133750958	3	NA
ENSDARG00000020759	ef1	ENSDARG00000020759	427.998238	2.115790785	5.35533873	4.044502974	7.83E-05	2.01E-07	8.06E-07	X30 - X0_X3 - X0_X7 - X0	ETS-related factor1 [Source:ZFIN;Acc:ZDB-GENE-980526-335]	14	42067254	42118538	-1	2	KNOWN	0.930797233	-1.057186064	0.126388831	3	NA
ENSDARG00000020761	arrdc2	ENSDARG00000020761	388.8995192	1.820304234	1.971353961	2.297364942	0.031813855	0.012317973	0.004159056	X30 - X0_X3 - X0_X7 - X0	arrestin domain containing 2 [Source:ZFIN;Acc:ZDB-GENE-030131-7146]	11	13710022	13719300	1	2	KNOWN	-0.239195586	-0.858711516	1.097907102	5	NA
ENSDARG00000020781	col4a2	ENSDARG00000020781	416.8541326	3.187977927	4.349568342	7.175337973	0.000181087	3.02E-05	3.09E-06	X30 - X0_X3 - X0_X7 - X0	collagen, type IV, alpha 2 [Source:ZFIN;Acc:ZDB-GENE-070725-3]	9	8773012	8941992	1	2	KNOWN	-0.270500071	-0.836923963	1.107424034	5	NA
ENSDARG00000020785	lama4	ENSDARG00000020785	616.3729489	1.472217645	1.762359552	2.353313503	0.033547882	0.004389163	0.000328966	X30 - X0_X3 - X0_X7 - X0	laminin, alpha 4 [Source:ZFIN;Acc:ZDB-GENE-040724-213]	20	239656	280735	1	1	KNOWN	-0.223307744	-0.869468056	1.092775801	5	NA
ENSDARG00000020798	necap1	ENSDARG00000020798	4680.541913	-1.228943385	-1.940268388	-1.822538798	0.04059441	2.98E-05	6.12E-05	X30 - X0_X3 - X0_X7 - X0	NECAP endocytosis associated 1 [Source:ZFIN;Acc:ZDB-GENE-040426-1682]	19	11018578	11030565	1	2	KNOWN	-0.724819219	1.140855385	-0.416036166	1	NA
ENSDARG00000020850	eef1a1l1	ENSDARG00000020850	60394.59281	1.810588647	4.399845663	3.629720573	0.000147446	2.10E-07	5.68E-07	X30 - X0_X3 - X0_X7 - X0	eukaryotic translation elongation factor 1 alpha 1, like 1 [Source:ZFIN;Acc:ZDB-GENE-990415-52]	19	45287383	45303320	1	3	KNOWN	0.842220826	-1.10521425	0.262993424	3	NA
ENSDARG00000020884	gli2b	ENSDARG00000020884	20.62468762	2.467446731	3.861875835	3.568373963	0.002573963	9.06E-05	0.000172645	X30 - X0_X3 - X0_X7 - X0	GLI-Kruppel family member GLI2b [Source:ZFIN;Acc:ZDB-GENE-050523-1]	11	45001734	45053439	-1	1	KNOWN	0.76535205	-1.131459825	0.366107775	3	NA
ENSDARG00000020887	armc1l	ENSDARG00000020887	135.314144	3.229712186	13.3769552	9.376386543	8.88E-06	1.95E-08	5.11E-08	X30 - X0_X3 - X0_X7 - X0	armadillo repeat containing 1, like [Source:ZFIN;Acc:ZDB-GENE-030131-9819]	23	32151461	32157734	1	3	KNOWN	0.922648183	-1.062606261	0.139958078	3	NA
ENSDARG00000020901	gabrp	ENSDARG00000020901	161.7977029	-1.329294019	-2.250727614	-1.681018543	0.035717709	7.23E-05	0.001324222	X30 - X0_X3 - X0_X7 - X0	gamma-aminobutyric acid (GABA) A receptor, pi [Source:ZFIN;Acc:ZDB-GENE-081028-62]	14	35678160	35687467	1	2	KNOWN	-1.068932477	0.912669252	0.156263225	6	NA
ENSDARG00000020924	MYO1C (1 of 2)	ENSDARG00000020924	205.3115502	2.905191749	9.956498191	8.218029117	0.014758729	4.01E-05	0.000101319	X30 - X0_X3 - X0_X7 - X0	myosin IC [Source:HGNC Symbol;Acc:7597]	5	39394219	39416858	1	1	KNOWN_BY_PROJECTION	0.797575108	-1.121909577	0.324334469	3	NA
ENSDARG00000020929	fam49ba	ENSDARG00000020929	232.5832149	2.875111283	13.85148207	8.716583648	7.81E-05	6.17E-08	2.43E-07	X30 - X0_X3 - X0_X7 - X0	family with sequence similarity 49, member Ba [Source:ZFIN;Acc:ZDB-GENE-030131-9537]	2	31933330	31980162	-1	7	KNOWN	0.977867462	-1.020752704	0.042885241	2	NA
ENSDARG00000020956	pck2	ENSDARG00000020956	42.44409031	1.96530122	7.807282589	4.80447156	0.013341486	1.86E-06	2.05E-05	X30 - X0_X3 - X0_X7 - X0	phosphoenolpyruvate carboxykinase 2 (mitochondrial) [Source:ZFIN;Acc:ZDB-GENE-040426-2266]	24	12824152	12843055	-1	1	KNOWN	1.009205088	-0.990533421	-0.018671667	2	NA
ENSDARG00000021013	f3a	ENSDARG00000021013	360.4184179	2.157600845	12.9206511	5.656636799	0.000294618	3.94E-08	5.89E-07	X30 - X0_X3 - X0_X7 - X0	coagulation factor IIIa [Source:ZFIN;Acc:ZDB-GENE-071119-5]	24	31254109	31267455	-1	1	KNOWN	1.094503709	-0.865915036	-0.228588673	2	NA
ENSDARG00000021065	camk2b2	ENSDARG00000021065	242.9781689	-1.421002891	-2.401684109	-1.881958844	0.014573508	4.25E-05	0.000406143	X30 - X0_X3 - X0_X7 - X0	calcium/calmodulin-dependent protein kinase (CaM kinase) II beta 2 [Source:ZFIN;Acc:ZDB-GENE-090312-34]	10	46221688	46286085	-1	3	KNOWN	-1.019365726	0.979438265	0.039927462	1	NA
ENSDARG00000021086	znf367	ENSDARG00000021086	64.76302056	3.634126073	21.115944	8.911811634	0.001576867	4.47E-07	1.12E-05	X30 - X0_X3 - X0_X7 - X0	zinc finger protein 367 [Source:ZFIN;Acc:ZDB-GENE-050417-231]	8	1279137	1288484	-1	2	KNOWN	1.10356452	-0.846076352	-0.257488168	2	NA
ENSDARG00000021110	poc1b	ENSDARG00000021110	120.6101963	1.590099162	2.174293235	2.087242768	0.000735892	1.62E-05	2.47E-05	X30 - X0_X3 - X0_X7 - X0	POC1 centriolar protein homolog B (Chlamydomonas) [Source:ZFIN;Acc:ZDB-GENE-031118-54]	25	18854268	18922771	-1	1	KNOWN	0.709916939	-1.143636766	0.433719827	3	NA
ENSDARG00000021149	cbr1l	ENSDARG00000021149	276.2948874	2.443802485	15.72481902	8.418520477	0.007412643	1.23E-06	1.13E-05	X30 - X0_X3 - X0_X7 - X0	carbonyl reductase 1-like [Source:ZFIN;Acc:ZDB-GENE-030131-9642]	21	20520407	20528388	-1	1	KNOWN	1.031693585	-0.964963994	-0.066729591	2	NA
ENSDARG00000021241	zgc:165604	ENSDARG00000021241	1222.672449	1.297073464	2.076045179	1.338985117	0.007349623	6.36E-06	0.003577	X30 - X0_X3 - X0_X7 - X0	zgc:165604 [Source:ZFIN;Acc:ZDB-GENE-070615-34]	21	26952777	26964610	1	2	KNOWN	1.153379037	-0.624518353	-0.528860684	2	NA
ENSDARG00000021242	mvp	ENSDARG00000021242	1983.142948	2.357659978	14.47966032	7.39385392	7.11E-05	2.56E-08	1.64E-07	X30 - X0_X3 - X0_X7 - X0	major vault protein [Source:ZFIN;Acc:ZDB-GENE-030826-33]	3	15313013	15339124	-1	3	KNOWN	1.051363033	-0.939174963	-0.11218807	2	NA
ENSDARG00000021252	cct6a	ENSDARG00000021252	6875.587518	1.197250636	1.954050865	1.578206169	0.012919888	1.88E-06	3.01E-05	X30 - X0_X3 - X0_X7 - X0	chaperonin containing TCP1, subunit 6A (zeta 1) [Source:ZFIN;Acc:ZDB-GENE-011018-2]	21	40509530	40528855	-1	3	KNOWN	0.997741344	-1.002243455	0.004502111	2	NA
ENSDARG00000021318	capg	ENSDARG00000021318	997.7407052	3.726752663	37.29665112	20.87562165	3.79E-05	2.30E-08	7.06E-08	X30 - X0_X3 - X0_X7 - X0	capping protein (actin filament), gelsolin-like [Source:ZFIN;Acc:ZDB-GENE-030131-8541]	12	23931143	23959782	1	4	KNOWN	0.992695124	-1.007148201	0.014453077	2	NA
ENSDARG00000021377	sh3pxd2b	ENSDARG00000021377	711.829146	1.674533868	5.227681302	4.5882035	0.006944937	1.95E-06	3.73E-06	X30 - X0_X3 - X0_X7 - X0	SH3 and PX domains 2B [Source:ZFIN;Acc:ZDB-GENE-060810-52]	21	42358649	42421307	-1	3	KNOWN	0.737881116	-1.138127527	0.400246411	3	NA
ENSDARG00000021398	mul1a	ENSDARG00000021398	251.0154748	-1.225995055	-1.403131323	-1.305597506	0.047221335	0.003747531	0.014504671	X30 - X0_X3 - X0_X7 - X0	mitochondrial E3 ubiquitin ligase 1a [Source:ZFIN;Acc:ZDB-GENE-050102-5]	2	45022377	45033052	-1	1	KNOWN	-1.031982061	0.96461088	0.067371181	6	NA
ENSDARG00000021404	zgc:110319	ENSDARG00000021404	1138.47665	-1.193694778	-1.658009424	-1.573564979	0.023887825	3.16E-05	6.86E-05	X30 - X0_X3 - X0_X7 - X0	zgc:110319 [Source:ZFIN;Acc:ZDB-GENE-050417-345]	13	18403643	18408569	1	6	KNOWN	-0.739590018	1.137750056	-0.398160038	1	NA
ENSDARG00000021521	rgs14a	ENSDARG00000021521	26.93420364	5.924215901	27.55573206	17.69757441	0.010550418	3.58E-05	0.000161868	X30 - X0_X3 - X0_X7 - X0	regulator of G-protein signaling 14a [Source:ZFIN;Acc:ZDB-GENE-030131-5579]	14	871151	897205	-1	1	KNOWN	0.969222047	-1.028170098	0.058948051	2	NA
ENSDARG00000021572	mb21d1	ENSDARG00000021572	9.142302902	11.31049706	13.43588447	11.46953289	0.001124423	0.000525071	0.000919989	X30 - X0_X3 - X0_X7 - X0	Mab-21 domain containing 1 [Source:ZFIN;Acc:ZDB-GENE-090313-23]	13	27552708	27556450	1	2	KNOWN	1.152092814	-0.643214928	-0.508877886	2	NA
ENSDARG00000021677	phf11	ENSDARG00000021677	141.2552914	5.267302865	8.001643945	10.11614771	0.002204705	0.000216177	8.99E-05	X30 - X0_X3 - X0_X7 - X0	PHD finger protein 11 [Source:ZFIN;Acc:ZDB-GENE-081104-417]	9	30650162	30667662	1	4	KNOWN	0.084990147	-1.039782648	0.954792501	4	NA
ENSDARG00000021688	mxa	ENSDARG00000021688	78.2310193	13.54872834	16.42471735	25.04936731	0.002956791	0.001150181	0.000278582	X30 - X0_X3 - X0_X7 - X0	myxovirus (influenza) resistance A [Source:ZFIN;Acc:ZDB-GENE-030721-5]	1	6488341	6496206	1	2	KNOWN	-0.32017104	-0.800704716	1.120875757	5	NA
ENSDARG00000021697	morn3	ENSDARG00000021697	12.28626264	2.995517204	5.049850646	4.203099164	0.028896251	0.001518875	0.004129352	X30 - X0_X3 - X0_X7 - X0	MORN repeat containing 3 [Source:ZFIN;Acc:ZDB-GENE-050417-152]	10	43290218	43304932	-1	2	KNOWN	0.936648421	-1.053146664	0.116498243	2	NA
ENSDARG00000021720	COL7A1	ENSDARG00000021720	63.14572641	1.803719439	2.267499936	3.833734144	0.01991413	0.002840092	8.07E-05	X30 - X0_X3 - X0_X7 - X0	collagen, type VII, alpha 1 [Source:HGNC Symbol;Acc:2214]	6	40115992	40174833	-1	1	KNOWN_BY_PROJECTION	-0.345467581	-0.781461741	1.126929322	5	NA
ENSDARG00000021838	rps23	ENSDARG00000021838	6370.019435	1.43107	2.990166393	2.317506832	0.004817913	2.10E-06	1.50E-05	X30 - X0_X3 - X0_X7 - X0	ribosomal protein S23 [Source:ZFIN;Acc:ZDB-GENE-080220-50]	11	43635484	43640229	1	1	KNOWN	0.951318348	-1.04244401	0.091125663	2	NA
ENSDARG00000021849	si:dkey-256h2.1	ENSDARG00000021849	136.6749525	2.488262002	4.6760661	4.99196595	0.000410021	6.75E-06	5.02E-06	X30 - X0_X3 - X0_X7 - X0	si:dkey-256h2.1 [Source:ZFIN;Acc:ZDB-GENE-030131-9466]	16	50574342	50592491	-1	2	KNOWN	0.457621957	-1.146926771	0.689304814	4	NA
ENSDARG00000021859	ERAP1 (1 of 2)	ENSDARG00000021859	287.2064578	2.520082301	4.674614869	3.989527791	3.36E-05	6.60E-07	1.50E-06	X30 - X0_X3 - X0_X7 - X0	endoplasmic reticulum aminopeptidase 1 [Source:HGNC Symbol;Acc:18173]	5	27878974	27892220	-1	4	KNOWN_BY_PROJECTION	0.859861832	-1.097372466	0.237510634	3	NA
ENSDARG00000021864	rplp1	ENSDARG00000021864	14032.66833	1.646479617	3.672248849	2.703223116	0.000425288	4.36E-07	3.00E-06	X30 - X0_X3 - X0_X7 - X0	ribosomal protein, large, P1 [Source:ZFIN;Acc:ZDB-GENE-030131-8663]	19	1975483	1978773	-1	3	KNOWN	0.985258504	-1.014116798	0.028858294	2	NA
ENSDARG00000021948	tnc	ENSDARG00000021948	906.0411537	1.431753064	1.321382262	2.8038212	0.00179354	0.008337653	1.05E-06	X30 - X0_X3 - X0_X7 - X0	tenascin C [Source:ZFIN;Acc:ZDB-GENE-980526-104]	5	30199064	30263575	-1	7	KNOWN	-0.64288073	-0.50923904	1.152119771	5	NA
ENSDARG00000021982	sh3bp2	ENSDARG00000021982	64.60389915	4.386477159	16.79559133	13.62915119	0.001622932	4.37E-06	9.85E-06	X30 - X0_X3 - X0_X7 - X0	SH3-domain binding protein 2 [Source:ZFIN;Acc:ZDB-GENE-091204-268]	10	15250215	15272781	1	2	KNOWN	0.805221356	-1.119349072	0.314127716	3	NA
ENSDARG00000022001	CNOT6 (2 of 2)	ENSDARG00000022001	139.2319548	-1.365206958	-1.802599461	-1.456328736	0.047100468	0.001509398	0.019070687	X30 - X0_X3 - X0_X7 - X0	CCR4-NOT transcription complex, subunit 6 [Source:HGNC Symbol;Acc:14099]	14	52632244	52656973	1	1	KNOWN_BY_PROJECTION	-1.131971869	0.763418873	0.368552996	6	NA
ENSDARG00000022020	FOCAD	ENSDARG00000022020	90.03375716	1.762162114	6.803328128	3.907635257	0.004538756	3.38E-07	5.64E-06	X30 - X0_X3 - X0_X7 - X0	focadhesin [Source:HGNC Symbol;Acc:23377]	7	20098272	20194243	1	1	KNOWN_BY_PROJECTION	1.045753278	-0.946905012	-0.098848266	2	NA
ENSDARG00000022213	uck2b	ENSDARG00000022213	383.8261037	1.358399284	2.410913057	2.290633857	0.008066285	5.18E-06	8.08E-06	X30 - X0_X3 - X0_X7 - X0	uridine-cytidine kinase 2b [Source:ZFIN;Acc:ZDB-GENE-030131-5265]	2	5694306	5707806	-1	1	KNOWN	0.678587558	-1.148391545	0.469803986	3	NA
ENSDARG00000022309	dspa	ENSDARG00000022309	368.486798	1.542840226	3.870941554	3.457938418	0.03508651	1.83E-05	3.61E-05	X30 - X0_X3 - X0_X7 - X0	desmoplakin a [Source:ZFIN;Acc:ZDB-GENE-030131-2743]	2	1912379	1964899	1	3	KNOWN	0.735556454	-1.138633289	0.403076835	3	NA
ENSDARG00000022633	PTPLA	ENSDARG00000022633	62.41270604	1.59121078	1.512845673	1.738684746	0.002439869	0.00504271	0.000743096	X30 - X0_X3 - X0_X7 - X0	protein tyrosine phosphatase-like (proline instead of catalytic arginine), member A [Source:HGNC Symbol;Acc:9639]	7	65536892	65546460	1	2	KNOWN_BY_PROJECTION	-0.884301693	-0.200894942	1.085196635	8	NA
ENSDARG00000022684	fkbp1aa	ENSDARG00000022684	5261.732511	1.156029669	1.502525598	1.28720263	0.048018221	0.00011014	0.002758369	X30 - X0_X3 - X0_X7 - X0	FK506 binding protein 1Aa [Source:ZFIN;Acc:ZDB-GENE-030131-7275]	8	51430612	51433344	-1	3	KNOWN	1.070481548	-0.91014335	-0.160338198	2	NA
ENSDARG00000022712	stat3	ENSDARG00000022712	1427.968351	1.704652201	2.586177635	1.936384322	0.000321804	5.20E-06	7.28E-05	X30 - X0_X3 - X0_X7 - X0	signal transduction and activation of transcription 3 [Source:ZFIN;Acc:ZDB-GENE-980526-68]	3	16650646	16727426	1	3	KNOWN	1.116969405	-0.812028607	-0.304940798	2	NA
ENSDARG00000022833	rplp2	ENSDARG00000022833	4000.972842	1.254864233	1.676589181	1.636086268	0.039700825	0.000361705	0.000536087	X30 - X0_X3 - X0_X7 - X0	ribosomal protein, large P2 [Source:ZFIN;Acc:ZDB-GENE-031018-2]	6	49454476	49456852	-1	1	KNOWN	0.662197188	-1.150318444	0.488121257	3	NA
ENSDARG00000022971	epha6	ENSDARG00000022971	818.527768	-1.315855607	-2.020639007	-1.626078998	0.029442256	9.09E-05	0.001242851	X30 - X0_X3 - X0_X7 - X0	eph receptor A6 [Source:ZFIN;Acc:ZDB-GENE-090311-43]	1	33601718	33833876	1	3	KNOWN	-1.037414834	0.957829094	0.07958574	6	NA
ENSDARG00000022983	ccdc28a	ENSDARG00000022983	1676.64326	-1.246716438	-1.674026236	-1.559662616	0.02282909	0.000123037	0.000336591	X30 - X0_X3 - X0_X7 - X0	coiled-coil domain containing 28A [Source:ZFIN;Acc:ZDB-GENE-030131-5007]	17	33614796	33621778	-1	5	KNOWN	-0.816221337	1.115455738	-0.299234401	1	NA
ENSDARG00000023002	dtl	ENSDARG00000023002	50.92777728	6.133214348	29.74453	14.11706314	0.000426982	5.61E-07	7.68E-06	X30 - X0_X3 - X0_X7 - X0	denticleless homolog (Drosophila) [Source:ZFIN;Acc:ZDB-GENE-020419-34]	20	13056182	13088939	1	1	KNOWN	1.089050334	-0.876906014	-0.212144319	2	NA
ENSDARG00000023003	ccdc12	ENSDARG00000023003	160.9801866	1.441119683	2.785174689	2.067996912	0.011342121	8.34E-06	0.000115796	X30 - X0_X3 - X0_X7 - X0	coiled-coil domain containing 12 [Source:ZFIN;Acc:ZDB-GENE-040801-108]	16	18578451	18603565	1	1	KNOWN	1.021626764	-0.976870317	-0.044756447	2	NA
ENSDARG00000023036	si:dkey-23a23.2	ENSDARG00000023036	69.34240615	1.736197964	2.211414931	2.329146375	0.010062407	0.000891296	0.000539757	X30 - X0_X3 - X0_X7 - X0	si:dkey-23a23.2 [Source:ZFIN;Acc:ZDB-GENE-060503-158]	4	28347910	28357786	-1	2	KNOWN	0.37959139	-1.134217625	0.754626235	4	NA
ENSDARG00000023053	fam129ab	ENSDARG00000023053	136.2460151	6.196780551	55.36186906	29.61559798	0.000463779	1.75E-07	9.50E-07	X30 - X0_X3 - X0_X7 - X0	family with sequence similarity 129, member Ab [Source:ZFIN;Acc:ZDB-GENE-070912-688]	2	22753914	22806760	-1	3	KNOWN	1.015400666	-0.983852741	-0.031547925	2	NA
ENSDARG00000023160	snrnp40	ENSDARG00000023160	328.804134	1.218556319	2.357527106	1.981852199	0.02444345	1.35E-06	7.09E-06	X30 - X0_X3 - X0_X7 - X0	small nuclear ribonucleoprotein 40 (U5) [Source:ZFIN;Acc:ZDB-GENE-040426-978]	19	44607303	44619290	1	1	KNOWN	0.869924474	-1.092551438	0.222626963	3	NA
ENSDARG00000023188	lcp1	ENSDARG00000023188	199.2980309	2.769696091	14.40700346	8.011771296	0.003330122	1.90E-06	1.41E-05	X30 - X0_X3 - X0_X7 - X0		9	57977606	57985364	-1	3	KNOWN	1.420083478	-1.13295755	0.017070772	2	NA
ENSDARG00000023228	vsnl1a	ENSDARG00000023228	5787.890442	-1.254462537	-2.347277694	-1.978495673	0.039381884	8.99E-06	4.47E-05	X30 - X0_X3 - X0_X7 - X0	visinin-like 1a [Source:ZFIN;Acc:ZDB-GENE-041001-211]	20	35407046	35454345	1	2	KNOWN	-0.876339247	1.08933945	-0.213000202	1	NA
ENSDARG00000023290	fabp3	ENSDARG00000023290	4874.366197	1.896712868	2.132966719	2.513764916	0.00019905	5.54E-05	1.33E-05	X30 - X0_X3 - X0_X7 - X0	fatty acid binding protein 3, muscle and heart [Source:ZFIN;Acc:ZDB-GENE-020318-2]	19	44558175	44596201	1	2	KNOWN	-0.15475764	-0.91359926	1.0683569	5	NA
ENSDARG00000023298	rps27.1	ENSDARG00000023298	7999.551409	1.319265953	1.981629605	1.843881206	0.020345298	6.58E-05	0.000150885	X30 - X0_X3 - X0_X7 - X0	ribosomal protein S27, isoform 1 [Source:ZFIN;Acc:ZDB-GENE-050522-549]	19	9365796	9371107	-1	1	KNOWN	0.763091266	-1.132057984	0.368966718	3	NA
ENSDARG00000023299	nhp2l1b	ENSDARG00000023299	380.0952465	1.583766549	4.93768408	3.111132339	0.002486973	3.16E-07	3.91E-06	X30 - X0_X3 - X0_X7 - X0	NHP2 non-histone chromosome protein 2-like 1b (S. cerevisiae) [Source:ZFIN;Acc:ZDB-GENE-030131-9670]	12	11522871	11526264	1	1	KNOWN	1.028371996	-0.968980763	-0.059391232	2	NA
ENSDARG00000023318	FMN2 (1 of 2)	ENSDARG00000023318	508.6827178	-1.322638246	-2.545617843	-2.04765206	0.035273893	2.12E-05	0.000128898	X30 - X0_X3 - X0_X7 - X0	formin 2 [Source:HGNC Symbol;Acc:14074]	17	19603302	19631169	-1	1	KNOWN_BY_PROJECTION	-0.932773223	1.055836004	-0.123062781	1	NA
ENSDARG00000023330	anp32b	ENSDARG00000023330	1900.132825	1.320111749	2.875496582	1.900612817	0.00573057	5.14E-07	1.85E-05	X30 - X0_X3 - X0_X7 - X0	acidic (leucine-rich) nuclear phosphoprotein 32 family, member B [Source:ZFIN;Acc:ZDB-GENE-030131-719]	1	25626438	25630909	-1	3	KNOWN	1.073082293	-0.905825311	-0.167256982	2	NA
ENSDARG00000023578	lpp	ENSDARG00000023578	249.2508584	1.605971129	4.68625867	3.891199082	0.033106043	1.15E-05	3.36E-05	X30 - X0_X3 - X0_X7 - X0	LIM domain containing preferred translocation partner in lipoma [Source:ZFIN;Acc:ZDB-GENE-040426-918]	6	28007909	28404466	1	2	KNOWN	0.807822779	-1.118450939	0.31062816	3	NA
ENSDARG00000023584	cdc7	ENSDARG00000023584	39.87374358	4.049110196	22.8536378	16.89510653	0.004839193	2.34E-06	6.98E-06	X30 - X0_X3 - X0_X7 - X0	cell division cycle 7 homolog (S. cerevisiae) [Source:ZFIN;Acc:ZDB-GENE-041114-113]	2	10655336	10669070	-1	3	KNOWN	0.858917144	-1.097811776	0.238894631	3	NA
ENSDARG00000023587	kcnk5a	ENSDARG00000023587	58.72050829	2.212553985	2.433578118	2.36855921	0.027816524	0.01584129	0.01716567	X30 - X0_X3 - X0_X7 - X0	potassium channel, subfamily K, member 5a [Source:ZFIN;Acc:ZDB-GENE-051113-112]	17	48839342	48861566	-1	1	KNOWN	0.839398662	-1.106399713	0.267001051	3	NA
ENSDARG00000023673	spint1a	ENSDARG00000023673	42.3110386	5.689651864	6.329653561	8.453051008	0.000215212	0.000104131	2.77E-05	X30 - X0_X3 - X0_X7 - X0	serine peptidase inhibitor, Kunitz type 1 a [Source:ZFIN;Acc:ZDB-GENE-040426-2169]	17	1379784	1419749	-1	1	KNOWN	-0.341827194	-0.784264725	1.126091919	5	NA
ENSDARG00000023683	cacna1f	ENSDARG00000023683	1252.47642	-1.212644427	-1.702054518	-1.513468137	0.032155316	6.47E-05	0.000352665	X30 - X0_X3 - X0_X7 - X0	calcium channel, voltage-dependent, alpha 1F subunit [Source:ZFIN;Acc:ZDB-GENE-031104-1]	8	23712661	23779257	1	3	KNOWN	-0.915565508	1.067130643	-0.151565135	1	NA
ENSDARG00000023963	tpm4a	ENSDARG00000023963	720.0141588	2.271460727	8.573057738	5.976689725	0.006975485	6.52E-06	2.74E-05	X30 - X0_X3 - X0_X7 - X0	tropomyosin 4a [Source:ZFIN;Acc:ZDB-GENE-040426-2185]	22	15724318	15748689	-1	5	KNOWN	0.936524338	-1.053233641	0.116709303	2	NA
ENSDARG00000024017	mamdc1	ENSDARG00000024017	968.3894168	-1.230419593	-2.017522042	-1.765871147	0.037053787	1.85E-05	8.47E-05	X30 - X0_X3 - X0_X7 - X0	MAM domain containing 1 [Source:ZFIN;Acc:ZDB-GENE-030616-360]	17	28399986	28624742	1	1	KNOWN	-0.861346585	1.096677456	-0.23533087	1	NA
ENSDARG00000024032	coch	ENSDARG00000024032	1165.6873	2.445964652	3.61146855	3.765555358	0.011568563	0.000870483	0.000781344	X30 - X0_X3 - X0_X7 - X0	coagulation factor C homolog, cochlin (Limulus polyphemus) [Source:ZFIN;Acc:ZDB-GENE-030616-403]	17	28802305	28808750	-1	3	KNOWN	0.467268564	-1.148098643	0.680830078	4	NA
ENSDARG00000024204	mcm3	ENSDARG00000024204	65.90295648	4.140063887	38.37501566	23.37487723	0.008984095	8.23E-07	4.46E-06	X30 - X0_X3 - X0_X7 - X0	MCM3 minichromosome maintenance deficient 3 (S. cerevisiae) [Source:ZFIN;Acc:ZDB-GENE-020419-4]	20	34794805	34808351	1	1	KNOWN	1.568702182	-1.035152525	0.427816069	11	NA
ENSDARG00000024209	wasf2	ENSDARG00000024209	811.5309952	1.343710047	4.321282232	2.784316275	0.024031079	5.01E-07	7.44E-06	X30 - X0_X3 - X0_X7 - X0	WAS protein family, member 2 [Source:ZFIN;Acc:ZDB-GENE-040426-865]	19	45040524	45059977	-1	3	KNOWN	1.010610897	-0.989040098	-0.021570798	2	NA
ENSDARG00000024278	adh8b	ENSDARG00000024278	310.5166723	1.497533993	3.837122131	3.029604189	0.0267798	9.53E-06	4.08E-05	X30 - X0_X3 - X0_X7 - X0	alcohol dehydrogenase 8b [Source:ZFIN;Acc:ZDB-GENE-030529-2]	13	12502380	12515909	-1	3	KNOWN	0.882769311	-1.086007613	0.203238302	3	NA
ENSDARG00000024365	crlf1a	ENSDARG00000024365	822.2983196	2.357775544	31.06327972	12.28489727	0.006217909	1.58E-07	1.62E-06	X30 - X0_X3 - X0_X7 - X0	cytokine receptor-like factor 1a [Source:ZFIN;Acc:ZDB-GENE-040718-397]	2	41977713	42021750	1	2	KNOWN	1.085712034	-0.883329268	-0.202382765	2	NA
ENSDARG00000024371	cdh1	ENSDARG00000024371	94.87643377	47.74359662	109.9839028	107.3564827	1.26E-05	1.31E-06	1.38E-06	X30 - X0_X3 - X0_X7 - X0	cadherin 1, epithelial [Source:ZFIN;Acc:ZDB-GENE-010606-1]	7	56206925	56228078	1	2	KNOWN	0.614268819	-1.153896102	0.539627283	4	NA
ENSDARG00000024488	top2a	ENSDARG00000024488	493.1861939	16.21180337	79.29720563	47.81999275	1.87E-06	5.07E-08	1.16E-07	X30 - X0_X3 - X0_X7 - X0	topoisomerase (DNA) II alpha [Source:ZFIN;Acc:ZDB-GENE-030131-2453]	12	11702256	11719558	1	2	KNOWN	0.999307223	-1.00069134	0.001384117	2	Yes
ENSDARG00000024537	emilin1a	ENSDARG00000024537	513.7796183	1.35717539	2.299432463	1.934406006	0.021484744	3.28E-05	0.000181745	X30 - X0_X3 - X0_X7 - X0	elastin microfibril interfacer 1a [Source:ZFIN;Acc:ZDB-GENE-041001-191]	20	34870280	34889639	1	2	KNOWN	0.91720975	-1.066095374	0.148885624	3	NA
ENSDARG00000024540	zgc:100919	ENSDARG00000024540	1372.591633	2.939483921	26.29551954	15.96003336	5.87E-05	2.25E-08	6.42E-08	X30 - X0_X3 - X0_X7 - X0	zgc:100919 [Source:ZFIN;Acc:ZDB-GENE-040718-248]	8	30574662	30582993	1	1	KNOWN	0.9595679	-1.03604116	0.07647326	2	NA
ENSDARG00000024575	kif26bb	ENSDARG00000024575	363.1131176	1.695717133	2.566603957	2.903993509	0.006238725	9.81E-05	4.17E-05	X30 - X0_X3 - X0_X7 - X0	kinesin family member 26Bb [Source:ZFIN;Acc:ZDB-GENE-041001-188]	20	35038042	35077431	-1	3	KNOWN	0.285235116	-1.111627721	0.826392605	4	NA
ENSDARG00000024631	NLRC5	ENSDARG00000024631	154.1580018	3.562950451	4.702197164	6.18408349	5.64E-05	1.18E-05	3.14E-06	X30 - X0_X3 - X0_X7 - X0	NLR family, CARD domain containing 5 [Source:HGNC Symbol;Acc:29933]	18	17283463	17316969	1	2	KNOWN_BY_PROJECTION	-0.086900819	-0.953713662	1.040614481	4	NA
ENSDARG00000024748	DST	ENSDARG00000024748	3604.459942	-1.188106599	-1.452229691	-1.242119489	0.047907667	0.000644491	0.016493612	X30 - X0_X3 - X0_X7 - X0	dystonin [Source:HGNC Symbol;Acc:1090]	13	1302451	1594370	1	2	KNOWN_BY_PROJECTION	-1.1328674	0.759975918	0.372891482	6	NA
ENSDARG00000024775	si:ch211-129c21.1	ENSDARG00000024775	11.85211453	3.191733781	7.404347646	7.158830342	0.010354053	9.83E-05	0.000127358	X30 - X0_X3 - X0_X7 - X0	si:ch211-129c21.1 [Source:ZFIN;Acc:ZDB-GENE-030131-5796]	22	22679543	22704074	-1	3	KNOWN	0.628489713	-1.153143248	0.524653535	3	NA
ENSDARG00000024789	mxc	ENSDARG00000024789	162.7177064	37.06699741	25.43203767	27.90703176	5.46E-05	0.000186744	0.000134185	X30 - X0_X3 - X0_X7 - X0	myxovirus (influenza virus) resistance C [Source:ZFIN;Acc:ZDB-GENE-030721-7]	9	33838996	33846485	-1	1	KNOWN	-0.767361944	1.130920382	-0.363558438	1	NA
ENSDARG00000024815	ogfrl2	ENSDARG00000024815	108.1162429	5.697341256	10.43638199	11.38160789	0.000328676	2.29E-05	1.84E-05	X30 - X0_X3 - X0_X7 - X0	opioid growth factor receptor-like 2 [Source:ZFIN;Acc:ZDB-GENE-030616-523]	11	20511782	20518122	-1	2	KNOWN	0.415190871	-1.140715152	0.725524281	4	NA
ENSDARG00000024904	stil	ENSDARG00000024904	43.87634324	2.833936639	11.96725477	9.6708859	0.002782771	8.23E-07	1.92E-06	X30 - X0_X3 - X0_X7 - X0	TAL1 (SCL) interrupting locus [Source:ZFIN;Acc:ZDB-GENE-020419-39]	22	16106165	16118685	1	1	KNOWN	0.801906542	-1.120473544	0.318567002	3	NA
ENSDARG00000025032	nr3c1	ENSDARG00000025032	2069.405266	-1.185127625	-1.427491675	-1.421796377	0.025718389	0.00030912	0.000335785	X30 - X0_X3 - X0_X7 - X0	nuclear receptor subfamily 3, group C, member 1 (glucocorticoid receptor) [Source:ZFIN;Acc:ZDB-GENE-050522-503]	14	24652384	24705620	-1	3	KNOWN	-0.597816159	1.154455787	-0.556639628	1	NA
ENSDARG00000025043	trip13	ENSDARG00000025043	79.95651041	14.14668828	133.3575956	47.66026317	0.000186038	1.38E-07	2.05E-06	X30 - X0_X3 - X0_X7 - X0	thyroid hormone receptor interactor 13 [Source:ZFIN;Acc:ZDB-GENE-040426-1488]	16	56493081	56517756	1	3	KNOWN	1.110982639	-0.828049904	-0.282932735	2	NA
ENSDARG00000025073	rpl18a	ENSDARG00000025073	8850.223623	1.487530006	3.048587029	2.401926652	0.002261122	1.59E-06	9.64E-06	X30 - X0_X3 - X0_X7 - X0	ribosomal protein L18a [Source:ZFIN;Acc:ZDB-GENE-040426-1071]	4	101572	108726	1	2	KNOWN	0.938241539	-1.052024802	0.113783263	2	NA
ENSDARG00000025076	marveld2a	ENSDARG00000025076	45.70209098	2.394736185	7.139267813	5.932164222	0.003906505	4.16E-06	1.16E-05	X30 - X0_X3 - X0_X7 - X0	MARVEL domain containing 2a [Source:ZFIN;Acc:ZDB-GENE-050411-59]	10	2974240	2998599	-1	2	KNOWN	0.804557064	-1.119576202	0.315019138	3	NA
ENSDARG00000025147	cd63	ENSDARG00000025147	4894.555325	1.57234754	8.63380156	4.959380333	0.006015734	1.20E-07	9.72E-07	X30 - X0_X3 - X0_X7 - X0	Cd63 antigen [Source:ZFIN;Acc:ZDB-GENE-030131-180]	23	32304747	32324518	1	1	KNOWN	1.013286379	-0.986161735	-0.027124643	2	NA
ENSDARG00000025301	gfap	ENSDARG00000025301	2712.188257	1.520074913	2.827761107	1.993783875	0.001172849	1.91E-06	3.52E-05	X30 - X0_X3 - X0_X7 - X0	glial fibrillary acidic protein [Source:ZFIN;Acc:ZDB-GENE-990914-3]	3	31929417	31941457	-1	1	KNOWN	1.078278398	-0.896891589	-0.181386808	2	NA
ENSDARG00000025375	idh1	ENSDARG00000025375	1186.047773	1.253501179	1.946094943	1.53672823	0.044994771	6.85E-05	0.001592138	X30 - X0_X3 - X0_X7 - X0	isocitrate dehydrogenase 1 (NADP+), soluble [Source:ZFIN;Acc:ZDB-GENE-031006-1]	9	29138150	29161591	1	2	KNOWN	1.054893047	-0.934141119	-0.120751928	2	NA
ENSDARG00000025420	fzd5	ENSDARG00000025420	578.145206	1.432838105	3.519093996	2.462977373	0.006697175	1.11E-06	1.29E-05	X30 - X0_X3 - X0_X7 - X0	frizzled homolog 5 [Source:ZFIN;Acc:ZDB-GENE-990415-218]	9	29266078	29268000	1	1	KNOWN	1.004124607	-0.995823713	-0.008300894	2	NA
ENSDARG00000025478	GIPR	ENSDARG00000025478	406.392278	-1.251626667	-1.948734837	-1.715561826	0.036565981	4.77E-05	0.000198665	X30 - X0_X3 - X0_X7 - X0	gastric inhibitory polypeptide receptor [Source:HGNC Symbol;Acc:4271]	15	28304201	28322308	1	1	KNOWN_BY_PROJECTION	-0.873841383	1.090603281	-0.216761898	1	NA
ENSDARG00000025555	ormdl3	ENSDARG00000025555	81.46913957	-1.314020005	-1.396708147	-1.465479788	0.025012223	0.009312736	0.004311688	X30 - X0_X3 - X0_X7 - X0	ORM1-like 3 (S. cerevisiae) [Source:ZFIN;Acc:ZDB-GENE-041010-190]	12	23585830	23593422	-1	2	KNOWN	-0.061168981	1.029180388	-0.968011407	7	NA
ENSDARG00000025559	pex11g	ENSDARG00000025559	47.73189141	1.583624042	2.98803784	2.233746096	0.0354853	0.000112716	0.001291568	X30 - X0_X3 - X0_X7 - X0	peroxisomal biogenesis factor 11 gamma [Source:ZFIN;Acc:ZDB-GENE-050913-79]	11	5638401	5647736	-1	1	KNOWN	1.023786037	-0.9743826	-0.049403437	2	NA
ENSDARG00000025581	rpl10	ENSDARG00000025581	10650.09611	1.452161579	2.972709262	2.345720053	0.003711013	2.10E-06	1.33E-05	X30 - X0_X3 - X0_X7 - X0	ribosomal protein L10 [Source:ZFIN;Acc:ZDB-GENE-030131-8656]	23	20001107	20004409	-1	8	KNOWN	0.936776618	-1.053056741	0.116280123	2	NA
ENSDARG00000025607	ifnphi1	ENSDARG00000025607	4.309682458	4.337498055	5.563556721	6.345828083	0.035386807	0.01277283	0.00659056	X30 - X0_X3 - X0_X7 - X0	interferon phi 1 [Source:ZFIN;Acc:ZDB-GENE-030721-3]	3	22575748	22579623	-1	3	KNOWN	0.146131086	-1.06502536	0.918894274	4	NA
ENSDARG00000025670	fstl3	ENSDARG00000025670	82.45485122	2.675595665	3.002447818	5.142873353	0.012239916	0.008699635	0.000358709	X30 - X0_X3 - X0_X7 - X0	follistatin-like 3 (secreted glycoprotein) [Source:ZFIN;Acc:ZDB-GENE-050913-111]	22	19108959	19117476	1	2	KNOWN	-0.451093424	-0.694989025	1.146082448	5	NA
ENSDARG00000025820	chek2	ENSDARG00000025820	82.05232858	2.093156377	7.923225819	4.999813008	0.01052825	2.87E-06	2.49E-05	X30 - X0_X3 - X0_X7 - X0	CHK2 checkpoint homolog (S. pombe) [Source:ZFIN;Acc:ZDB-GENE-030131-8942]	5	10963582	10989846	-1	1	KNOWN	1.000956654	-0.999040593	-0.001916061	2	NA
ENSDARG00000025826	gna12a	ENSDARG00000025826	620.3116039	1.555165954	3.109141617	2.26538297	0.002424193	2.78E-06	3.35E-05	X30 - X0_X3 - X0_X7 - X0	guanine nucleotide binding protein (G protein) alpha 12a [Source:ZFIN;Acc:ZDB-GENE-050221-1]	3	41642419	41701020	1	1	KNOWN	1.027381415	-0.970161485	-0.05721993	2	NA
ENSDARG00000025850	rps21	ENSDARG00000025850	5907.867552	1.376630821	2.491843069	2.103822309	0.009130829	7.73E-06	3.65E-05	X30 - X0_X3 - X0_X7 - X0	ribosomal protein S21 [Source:ZFIN;Acc:ZDB-GENE-040426-1102]	23	9327325	9335467	1	2	KNOWN	0.88508216	-1.084781049	0.199698888	3	NA
ENSDARG00000025855	camk2n1a	ENSDARG00000025855	4334.847833	-1.303390582	-1.894966979	-1.887721569	0.010553127	3.42E-05	3.48E-05	X30 - X0_X3 - X0_X7 - X0	calcium/calmodulin-dependent protein kinase II inhibitor 1a [Source:ZFIN;Acc:ZDB-GENE-050522-319]	2	45004897	45007595	-1	1	KNOWN	-0.5879889	1.154634787	-0.566645887	1	NA
ENSDARG00000025903	lgals9l1	ENSDARG00000025903	6485.763583	5.775008907	67.04348466	44.72991495	0.000155715	2.42E-07	5.43E-07	X30 - X0_X3 - X0_X7 - X0	lectin, galactoside-binding, soluble, 9 (galectin 9)-like 1 [Source:ZFIN;Acc:ZDB-GENE-030131-9543]	15	30329807	30340735	-1	2	KNOWN	0.898481903	-1.077371274	0.178889371	3	NA
ENSDARG00000025977	blmh	ENSDARG00000025977	697.3338289	1.435088796	3.046067766	2.10159667	0.003735708	1.37E-06	2.87E-05	X30 - X0_X3 - X0_X7 - X0	bleomycin hydrolase [Source:ZFIN;Acc:ZDB-GENE-030131-8485]	15	27983464	28134396	-1	2	KNOWN	1.052305855	-0.937843698	-0.114462157	2	NA
ENSDARG00000026017	xpnpep2	ENSDARG00000026017	85.71689747	2.971919425	6.938452155	8.394498049	0.000411675	2.92E-06	1.37E-06	X30 - X0_X3 - X0_X7 - X0	X-prolyl aminopeptidase (aminopeptidase P) 2, membrane-bound [Source:ZFIN;Acc:ZDB-GENE-040426-1151]	14	34566609	34588780	-1	1	KNOWN	0.298177947	-1.115172528	0.816994581	4	NA
ENSDARG00000026070	cd82b	ENSDARG00000026070	510.8811542	2.584043404	5.13600493	4.893496398	9.21E-05	1.51E-06	1.97E-06	X30 - X0_X3 - X0_X7 - X0	CD82 antigen, b [Source:ZFIN;Acc:ZDB-GENE-030131-2857]	18	27520356	27575299	1	3	KNOWN	0.661288723	-1.150414402	0.489125679	3	NA
ENSDARG00000026224	fanci	ENSDARG00000026224	74.96936715	6.247907443	35.69534557	17.51373291	2.67E-05	3.66E-08	2.60E-07	X30 - X0_X3 - X0_X7 - X0	Fanconi anemia, complementation group I [Source:ZFIN;Acc:ZDB-GENE-030131-2905]	25	8655592	8687198	1	5	KNOWN	1.068506387	-0.91335816	-0.155148227	2	NA
ENSDARG00000026225	whsc1	ENSDARG00000026225	499.4378945	1.303060806	3.206841527	2.041102937	0.011172735	4.14E-07	1.53E-05	X30 - X0_X3 - X0_X7 - X0	Wolf-Hirschhorn syndrome candidate 1 [Source:ZFIN;Acc:ZDB-GENE-030131-2581]	13	12863008	12900008	-1	4	KNOWN	1.065956299	-0.917429547	-0.148526752	2	NA
ENSDARG00000026296	zgc:112994	ENSDARG00000026296	11.80419092	3.31707629	4.763593509	2.900307426	0.016886195	0.001601421	0.027447957	X30 - X0_X3 - X0_X7 - X0	zgc:112994 [Source:ZFIN;Acc:ZDB-GENE-050522-519]	23	38252940	38275982	1	3	KNOWN	1.128180077	-0.351000187	-0.77717989	10	NA
ENSDARG00000026325	mmp11a	ENSDARG00000026325	106.6721063	1.575362733	1.95333608	2.650481524	0.026162567	0.002717208	0.000206284	X30 - X0_X3 - X0_X7 - X0	matrix metallopeptidase 11a [Source:ZFIN;Acc:ZDB-GENE-070817-3]	8	31645405	31673457	1	1	KNOWN	-0.195069719	-0.888092278	1.083161997	5	NA
ENSDARG00000026350	wasb	ENSDARG00000026350	289.1981118	3.738059974	8.696713006	7.574387934	6.89E-05	1.37E-06	2.44E-06	X30 - X0_X3 - X0_X7 - X0	Wiskott-Aldrich syndrome (eczema-thrombocytopenia) b [Source:ZFIN;Acc:ZDB-GENE-030131-7098]	8	24413126	24431603	-1	2	KNOWN	0.779561976	-1.12748848	0.347926504	3	NA
ENSDARG00000026369	dbi	ENSDARG00000026369	2805.630582	1.556870689	3.664473972	2.437080803	0.007642329	4.68E-06	7.80E-05	X30 - X0_X3 - X0_X7 - X0	diazepam binding inhibitor (GABA receptor modulator, acyl-CoA binding protein) [Source:ZFIN;Acc:ZDB-GENE-040426-1861]	9	893698	901125	1	2	KNOWN	1.050170806	-0.9408449	-0.109325906	2	NA
ENSDARG00000026406	anxa5a	ENSDARG00000026406	11.52077354	3.830558896	11.51491148	5.38438439	0.034844829	0.000448037	0.012123732	X30 - X0_X3 - X0_X7 - X0	annexin A5a [Source:ZFIN;Acc:ZDB-GENE-080220-29]	14	49346447	49369877	1	1	KNOWN	1.133393691	-0.757914147	-0.375479543	2	NA
ENSDARG00000026454	MIS12	ENSDARG00000026454	59.91309306	6.409149308	31.79159149	16.95201773	2.82E-05	5.49E-08	3.53E-07	X30 - X0_X3 - X0_X7 - X0	MIS12 kinetochore complex component [Source:HGNC Symbol;Acc:24967]	5	60690578	60694363	-1	1	KNOWN_BY_PROJECTION	1.051416712	-0.939099422	-0.112317289	2	NA
ENSDARG00000026489	khsrp	ENSDARG00000026489	1807.052151	1.186419661	1.818873464	1.415852446	0.029519596	9.71E-06	0.000470454	X30 - X0_X3 - X0_X7 - X0	KH-type splicing regulatory protein [Source:ZFIN;Acc:ZDB-GENE-030131-4357]	1	55499599	55511646	-1	3	KNOWN	1.078037968	-0.897314399	-0.18072357	2	NA
ENSDARG00000026491	lamb1a	ENSDARG00000026491	252.7176725	2.626616701	3.020362692	5.334893542	0.00058648	0.000219634	1.01E-05	X30 - X0_X3 - X0_X7 - X0	laminin, beta 1a [Source:ZFIN;Acc:ZDB-GENE-021226-1]	25	32549695	32566633	1	1	KNOWN	-0.723179407	-0.959853363	0.668045353	5	NA
ENSDARG00000026577	cdk2	ENSDARG00000026577	172.8221963	4.658787393	24.48982976	14.23858309	1.04E-05	2.30E-08	8.71E-08	X30 - X0_X3 - X0_X7 - X0	cyclin-dependent kinase 2 [Source:ZFIN;Acc:ZDB-GENE-040426-2741]	11	3281632	3288790	-1	1	KNOWN	1.011093026	-0.988524949	-0.022568076	2	NA
ENSDARG00000026582	iscub	ENSDARG00000026582	7700.959401	-1.3205251	-2.165381298	-1.973935752	0.012270315	1.58E-05	3.94E-05	X30 - X0_X3 - X0_X7 - X0	iron-sulfur cluster scaffold homolog (E. coli) b [Source:ZFIN;Acc:ZDB-GENE-050417-332]	5	33497658	33506462	1	4	KNOWN	-0.779798652	1.127419188	-0.347620535	1	NA
ENSDARG00000026611	socs3b	ENSDARG00000026611	1106.165462	2.247664942	12.872646	6.436864271	0.003930041	9.53E-07	9.81E-06	X30 - X0_X3 - X0_X7 - X0	suppressor of cytokine signaling 3b [Source:ZFIN;Acc:ZDB-GENE-040426-2528]	12	37046023	37065349	-1	2	KNOWN	1.062592635	-0.922669119	-0.139923516	2	NA
ENSDARG00000026704	ftr72	ENSDARG00000026704	61.4285778	3.307136785	3.357946409	4.934384043	0.026829053	0.023396157	0.003900892	X30 - X0_X3 - X0_X7 - X0	finTRIM family, member 72 [Source:ZFIN;Acc:ZDB-GENE-041114-86]	15	40278232	40282404	-1	2	KNOWN	-0.549673035	-0.604592085	1.154265119	5	NA
ENSDARG00000026726	anxa1a	ENSDARG00000026726	877.9373171	3.222723148	18.85733446	14.75097152	0.009004323	1.03E-05	2.29E-05	X30 - X0_X3 - X0_X7 - X0	annexin A1a [Source:ZFIN;Acc:ZDB-GENE-030131-6664]	5	27222730	27227874	-1	6	KNOWN	0.811825242	-1.117041887	0.305216645	3	NA
ENSDARG00000026829	cotl1	ENSDARG00000026829	3930.581086	1.535199931	4.100401417	2.85302011	0.001702277	3.86E-07	3.26E-06	X30 - X0_X3 - X0_X7 - X0	coactosin-like 1 (Dictyostelium) [Source:ZFIN;Acc:ZDB-GENE-030131-8325]	18	12680507	12693348	1	1	KNOWN	0.990722374	-1.009026334	0.018303961	2	NA
ENSDARG00000026871	uchl1	ENSDARG00000026871	2899.387652	1.458934603	2.994637131	3.07682262	0.019251437	1.78E-05	1.68E-05	X30 - X0_X3 - X0_X7 - X0	ubiquitin carboxyl-terminal esterase L1 (ubiquitin thiolesterase) [Source:ZFIN;Acc:ZDB-GENE-030131-3844]	1	21421850	21426118	-1	2	KNOWN	0.531670054	-1.153525973	0.621855918	4	NA
ENSDARG00000026895	tor1l3	ENSDARG00000026895	47.2345737	5.121695836	9.140295967	10.15274145	0.002424032	0.000159646	0.000120085	X30 - X0_X3 - X0_X7 - X0	torsin family 1 like 3 [Source:ZFIN;Acc:ZDB-GENE-040426-1859]	23	37664205	37673140	-1	1	KNOWN	0.376569156	-1.133613491	0.757044334	4	NA
ENSDARG00000026964	hk2	ENSDARG00000026964	225.6598198	2.290887985	13.52193391	6.831956771	0.001811059	2.33E-07	2.75E-06	X30 - X0_X3 - X0_X7 - X0	hexokinase 2 [Source:ZFIN;Acc:ZDB-GENE-040426-2017]	5	15078490	15394058	1	3	KNOWN	1.057346863	-0.930560491	-0.126786373	2	NA
ENSDARG00000026990	klhl6	ENSDARG00000026990	84.89769557	3.975437229	14.3460479	10.97063585	0.002359697	7.68E-06	2.40E-05	X30 - X0_X3 - X0_X7 - X0	kelch-like 6 (Drosophila) [Source:ZFIN;Acc:ZDB-GENE-030616-325]	2	36367284	36379989	1	2	KNOWN	0.866238359	-1.094347831	0.228109472	3	NA
ENSDARG00000027017	ppp2r5a	ENSDARG00000027017	1072.120943	-1.239508057	-2.518501745	-2.182074986	0.036624009	3.04E-06	9.98E-06	X30 - X0_X3 - X0_X7 - X0	protein phosphatase 2, regulatory subunit B', alpha isoform [Source:ZFIN;Acc:ZDB-GENE-040724-174]	20	13090153	13226692	1	1	KNOWN	-0.812173159	1.116917832	-0.304744673	1	NA
ENSDARG00000027063	arpc1b	ENSDARG00000027063	1926.308311	3.370055434	20.78854006	12.45344706	2.98E-05	4.74E-08	1.53E-07	X30 - X0_X3 - X0_X7 - X0	actin related protein 2/3 complex, subunit 1B [Source:ZFIN;Acc:ZDB-GENE-030131-7414]	3	40803793	40815394	1	1	KNOWN	0.98537694	-1.014008155	0.028631215	2	NA
ENSDARG00000027290	nrp1b	ENSDARG00000027290	330.1742336	1.441598325	2.61193455	2.003678214	0.039851534	0.000133242	0.001312097	X30 - X0_X3 - X0_X7 - X0	neuropilin 1b [Source:ZFIN;Acc:ZDB-GENE-040611-1]	2	43570359	43633838	1	3	KNOWN	1.012889134	-0.98659215	-0.026296985	2	NA
ENSDARG00000027419	gad1b	ENSDARG00000027419	26917.93561	-1.260361869	-2.486130166	-2.161345717	0.040374075	7.91E-06	2.62E-05	X30 - X0_X3 - X0_X7 - X0	glutamate decarboxylase 1b [Source:ZFIN;Acc:ZDB-GENE-030909-3]	6	3642627	3676989	1	4	KNOWN	-0.813868691	1.116309645	-0.302440953	1	NA
ENSDARG00000027464	gnsb	ENSDARG00000027464	470.0046469	2.870542343	19.30418682	12.39769242	0.000127387	5.22E-08	1.56E-07	X30 - X0_X3 - X0_X7 - X0	glucosamine (N-acetyl)-6-sulfatase (Sanfilippo disease IIID), b [Source:ZFIN;Acc:ZDB-GENE-030131-5846]	10	46310446	46326290	-1	1	KNOWN	0.942855932	-1.048720802	0.105864869	2	NA
ENSDARG00000027620	bco2l	ENSDARG00000027620	157.8635015	1.711122972	1.763421966	1.978132759	0.018342766	0.01260833	0.005219848	X30 - X0_X3 - X0_X7 - X0	beta-carotene 15, 15-dioxygenase 2, like [Source:ZFIN;Acc:ZDB-GENE-010509-1]	5	27765942	27775076	1	1	KNOWN	-0.382600879	-0.752210252	1.134811131	5	NA
ENSDARG00000027657	crhb	ENSDARG00000027657	997.7284205	-1.322106234	-2.188874079	-2.44499993	0.022729443	3.14E-05	1.23E-05	X30 - X0_X3 - X0_X7 - X0	corticotropin releasing hormone b [Source:ZFIN;Acc:ZDB-GENE-041114-75]	24	25455631	25489944	-1	3	KNOWN	-0.345892822	1.127026395	-0.781133573	1	NA
ENSDARG00000027658	irf10	ENSDARG00000027658	25.89136235	10.73554367	27.70509269	24.08098736	0.003650244	0.00011474	0.000264931	X30 - X0_X3 - X0_X7 - X0	interferon regulatory factor 10 [Source:ZFIN;Acc:ZDB-GENE-040426-2084]	23	658217	669549	1	2	KNOWN	0.76812007	-1.130715021	0.362594951	3	NA
ENSDARG00000027689	pold1	ENSDARG00000027689	342.3256752	1.719752837	5.040210188	3.113810311	0.000574916	1.77E-07	2.25E-06	X30 - X0_X3 - X0_X7 - X0	polymerase (DNA directed), delta 1, catalytic subunit [Source:ZFIN;Acc:ZDB-GENE-060429-1]	3	16307811	16339225	-1	1	KNOWN	1.048956673	-0.942530275	-0.106426398	2	NA
ENSDARG00000027799	ucmaa	ENSDARG00000027799	19.25159347	5.272020391	9.464055374	12.59964918	0.048934214	0.002754535	0.000789594	X30 - X0_X3 - X0_X7 - X0	upper zone of growth plate and cartilage matrix associated a [Source:ZFIN;Acc:ZDB-GENE-070410-71]	4	7021787	7030640	1	1	KNOWN	0.095783626	-1.044445436	0.94866181	4	NA
ENSDARG00000027867	CU634009.1	ENSDARG00000027867	175.8450978	1.840119379	2.956569001	2.883584266	0.001282356	1.90E-05	2.43E-05	X30 - X0_X3 - X0_X7 - X0	Uncharacterized protein [Source:UniProtKB/TrEMBL;Acc:E7F419]	17	51648228	51720298	-1	1	KNOWN	0.634790968	-1.152727945	0.517936977	3	NA
ENSDARG00000028056	kntc1	ENSDARG00000028056	159.8505487	5.006617369	25.63722344	15.31311315	4.63E-06	1.72E-08	5.46E-08	X30 - X0_X3 - X0_X7 - X0	kinetochore associated 1 [Source:ZFIN;Acc:ZDB-GENE-050208-92]	5	69428450	69508909	1	3	KNOWN	1.00028448	-0.999715277	-0.000569203	2	NA
ENSDARG00000028088	galk1	ENSDARG00000028088	165.5704482	1.634442009	10.89207031	4.919311483	0.012270315	8.28E-08	1.92E-06	X30 - X0_X3 - X0_X7 - X0	galactokinase 1 [Source:ZFIN;Acc:ZDB-GENE-041010-79]	12	35285117	35300331	-1	1	KNOWN	1.081688774	-0.890790164	-0.19089861	2	NA
ENSDARG00000028106	glrx	ENSDARG00000028106	364.5235578	1.438918753	7.729996355	4.72249305	0.012851123	7.06E-08	4.84E-07	X30 - X0_X3 - X0_X7 - X0	glutaredoxin (thioltransferase) [Source:ZFIN;Acc:ZDB-GENE-041010-11]	21	10200337	10206102	1	4	KNOWN	0.985056248	-1.014302157	0.029245909	2	NA
ENSDARG00000028159	tead1a	ENSDARG00000028159	361.5686731	1.771347627	7.070665419	3.34930784	0.001164034	1.52E-07	5.18E-06	X30 - X0_X3 - X0_X7 - X0	TEA domain family member 1a [Source:ZFIN;Acc:ZDB-GENE-040426-2101]	25	16713139	16793062	1	5	KNOWN	1.105091239	-0.84251116	-0.262580079	2	NA
ENSDARG00000028173	slc4a2a	ENSDARG00000028173	250.1396987	1.705940775	4.771001148	4.795936338	0.048646853	3.71E-05	3.72E-05	X30 - X0_X3 - X0_X7 - X0	solute carrier family 4, anion exchanger, member 2a [Source:ZFIN;Acc:ZDB-GENE-051101-2]	2	32109772	32175798	-1	3	KNOWN	0.570319394	-1.154672113	0.584352719	4	NA
ENSDARG00000028295	mkrn4	ENSDARG00000028295	90.29543916	1.762930205	6.753985568	3.905519635	0.027991587	3.87E-06	6.50E-05	X30 - X0_X3 - X0_X7 - X0	makorin, ring finger protein, 4 [Source:ZFIN;Acc:ZDB-GENE-030131-5954]	8	24578900	24584156	1	3	KNOWN	1.043669309	-0.949696525	-0.093972784	2	NA
ENSDARG00000028306	prph	ENSDARG00000028306	965.412623	4.699592866	9.00782582	10.87329024	5.53E-06	3.70E-07	2.17E-07	X30 - X0_X3 - X0_X7 - X0	peripherin [Source:ZFIN;Acc:ZDB-GENE-990415-207]	11	3301708	3314835	-1	1	KNOWN	0.257157677	-1.103464702	0.846307025	4	NA
ENSDARG00000028335	hmga1a	ENSDARG00000028335	11235.31037	1.542736499	3.334734592	2.696678127	0.000139193	1.02E-07	3.67E-07	X30 - X0_X3 - X0_X7 - X0	high mobility group AT-hook 1a [Source:ZFIN;Acc:ZDB-GENE-010502-1]	23	3765200	3773434	-1	7	KNOWN	0.891804771	-1.081129265	0.189324494	3	NA
ENSDARG00000028367	sult2st3	ENSDARG00000028367	171.3073464	1.743198964	2.686577547	3.16105406	0.045317943	0.001236286	0.000463322	X30 - X0_X3 - X0_X7 - X0	sulfotransferase family 2, cytosolic sulfotransferase 3 [Source:ZFIN;Acc:ZDB-GENE-061117-4]	16	47818701	47836930	-1	1	KNOWN	0.216562584	-1.090536598	0.873974013	4	NA
ENSDARG00000028389	rab44	ENSDARG00000028389	243.8366698	2.93918366	4.988664313	3.570754714	0.044428584	0.003713674	0.016375628	X30 - X0_X3 - X0_X7 - X0	RAB44, member RAS oncogene family [Source:ZFIN;Acc:ZDB-GENE-040724-117]	6	40988807	41010073	-1	2	KNOWN	1.101198331	-0.851467372	-0.249730959	2	NA
ENSDARG00000028523	inip	ENSDARG00000028523	155.8889346	1.441010594	2.933776082	2.276976723	0.04901983	5.39E-05	0.000388658	X30 - X0_X3 - X0_X7 - X0	ints3 and nabp interacting protein [Source:ZFIN;Acc:ZDB-GENE-040426-961]	10	11285867	11289030	-1	1	KNOWN	0.957695593	-1.037519761	0.079824168	2	NA
ENSDARG00000028618	KRT18 (3 of 3)	ENSDARG00000028618	2429.30658	3.848008913	18.26224231	15.86635357	8.74E-05	3.03E-07	4.73E-07	X30 - X0_X3 - X0_X7 - X0	keratin 18 [Source:HGNC Symbol;Acc:6430]	6	39291241	39296331	1	2	KNOWN_BY_PROJECTION	0.725459947	-1.140727981	0.415268033	3	NA
ENSDARG00000028676	NUAK1 (1 of 2)	ENSDARG00000028676	185.6105372	1.73924753	2.583995609	3.984934102	0.009142408	0.000204233	1.24E-05	X30 - X0_X3 - X0_X7 - X0	NUAK family, SNF1-like kinase, 1 [Source:HGNC Symbol;Acc:14311]	25	6352060	6374926	1	1	KNOWN_BY_PROJECTION	-0.163451117	-0.908205146	1.071656263	5	NA
ENSDARG00000028688	exosc2	ENSDARG00000028688	149.2572212	1.529798207	4.12728306	2.558870274	0.006168861	9.07E-07	2.22E-05	X30 - X0_X3 - X0_X7 - X0	exosome component 2 [Source:ZFIN;Acc:ZDB-GENE-050417-27]	5	75251684	75257645	1	3	KNOWN	1.061611987	-0.924169682	-0.137442305	2	NA
ENSDARG00000028816	tmed3	ENSDARG00000028816	212.5863426	1.311236961	3.130683485	2.424532273	0.04676604	4.43E-06	3.17E-05	X30 - X0_X3 - X0_X7 - X0	transmembrane emp24 protein transport domain containing 3 [Source:ZFIN;Acc:ZDB-GENE-030131-8335]	7	31512174	31514199	-1	1	KNOWN	0.917780909	-1.06573364	0.147952731	3	NA
ENSDARG00000028971	cpsf2	ENSDARG00000028971	799.5745853	1.197845773	1.955530986	1.458825449	0.0449164	1.13E-05	0.000696009	X30 - X0_X3 - X0_X7 - X0	cleavage and polyadenylation specific factor 2 [Source:ZFIN;Acc:ZDB-GENE-040718-79]	20	50365142	50398350	1	2	KNOWN	1.086319117	-0.882177378	-0.204141739	2	NA
ENSDARG00000029014	orc4	ENSDARG00000029014	169.0135927	1.757809416	9.004601904	4.436936325	0.006929332	2.23E-07	5.02E-06	X30 - X0_X3 - X0_X7 - X0	origin recognition complex, subunit 4 [Source:ZFIN;Acc:ZDB-GENE-040426-2224]	6	1422821	1436521	1	4	KNOWN	1.074770527	-0.902968681	-0.171801846	2	NA
ENSDARG00000029036	rab32a	ENSDARG00000029036	257.1765368	1.433365806	4.645051794	2.486939601	0.022626085	1.18E-06	6.19E-05	X30 - X0_X3 - X0_X7 - X0	RAB32a, member RAS oncogene family [Source:ZFIN;Acc:ZDB-GENE-031006-10]	20	32048152	32084063	-1	4	KNOWN	1.09329409	-0.868409418	-0.224884672	2	NA
ENSDARG00000029058	rbb4	ENSDARG00000029058	2666.044583	1.316937642	2.355733372	1.723203174	0.024393083	1.85E-05	0.000453428	X30 - X0_X3 - X0_X7 - X0	retinoblastoma binding protein 4 [Source:ZFIN;Acc:ZDB-GENE-030131-445]	19	32243949	32252815	-1	3	KNOWN	1.064222801	-0.920147961	-0.144074841	2	NA
ENSDARG00000029063	clpxa	ENSDARG00000029063	1052.799612	-1.254331836	-1.457204937	-1.629954546	0.027799169	0.001913052	0.00034633	X30 - X0_X3 - X0_X7 - X0	ClpX caseinolytic peptidase X homolog a [Source:ZFIN;Acc:ZDB-GENE-040912-143]	7	14542830	14563525	-1	1	KNOWN	-0.053406878	1.025633256	-0.972226378	7	NA
ENSDARG00000029150	hsp90ab1	ENSDARG00000029150	46816.17932	1.264213087	2.039608614	1.863208529	0.005176796	2.36E-06	6.46E-06	X30 - X0_X3 - X0_X7 - X0	heat shock protein 90, alpha (cytosolic), class B member 1 [Source:ZFIN;Acc:ZDB-GENE-990415-95]	20	51532469	51546551	1	4	KNOWN	0.780599396	-1.127183975	0.346584578	3	NA
ENSDARG00000029187	exosc3	ENSDARG00000029187	231.0396229	1.341621313	2.067175888	1.791595061	0.01431145	3.76E-05	0.000195392	X30 - X0_X3 - X0_X7 - X0	exosome component 3 [Source:ZFIN;Acc:ZDB-GENE-050706-140]	14	53498788	53502929	1	2	KNOWN	0.911149312	-1.069867093	0.158717781	3	NA
ENSDARG00000029241	cep55l	ENSDARG00000029241	76.42140468	5.246497621	28.38726254	16.1439871	2.67E-05	3.31E-08	1.69E-07	X30 - X0_X3 - X0_X7 - X0	centrosomal protein 55 like [Source:ZFIN;Acc:ZDB-GENE-050522-222]	12	5391324	5755325	-1	2	KNOWN	1.018811362	-0.980062197	-0.038749165	2	NA
ENSDARG00000029353	serpine2	ENSDARG00000029353	355.5545245	2.393977152	5.421083833	7.054685311	0.001684014	1.22E-05	4.46E-06	X30 - X0_X3 - X0_X7 - X0	serine (or cysteine) proteinase inhibitor, clade E (nexin, plasminogen activator inhibitor type 1), member 2 [Source:ZFIN;Acc:ZDB-GENE-040426-848]	15	42088881	42130923	-1	1	KNOWN	0.19642164	-1.083636568	0.887214928	4	NA
ENSDARG00000029381	aldh3a2b	ENSDARG00000029381	477.1025675	-1.291411981	-1.38513759	-1.436210569	0.012136313	0.002982857	0.001528497	X30 - X0_X3 - X0_X7 - X0	aldehyde dehydrogenase 3 family, member A2b [Source:ZFIN;Acc:ZDB-GENE-040912-103]	21	37864576	37893353	-1	2	KNOWN	-0.193597085	1.082643422	-0.889046337	7	NA
ENSDARG00000029402	sort1a	ENSDARG00000029402	728.6694916	-1.275650521	-1.778984098	-1.509337123	0.034816299	0.000249235	0.002256371	X30 - X0_X3 - X0_X7 - X0	sortilin 1a [Source:ZFIN;Acc:ZDB-GENE-040426-2329]	11	37123786	37181817	-1	3	KNOWN	-1.022944938	0.975355795	0.047589142	1	NA
ENSDARG00000029406	h2afx	ENSDARG00000029406	234.5617518	1.859205888	4.365230707	3.058278355	3.88E-05	6.69E-08	4.46E-07	X30 - X0_X3 - X0_X7 - X0	H2A histone family, member X [Source:ZFIN;Acc:ZDB-GENE-040426-987]	5	32173724	32174335	-1	1	KNOWN	1.014036259	-0.985346311	-0.028689948	2	NA
ENSDARG00000029419	hn1b	ENSDARG00000029419	2413.957327	1.594105642	3.450463035	2.918244094	0.00110928	1.02E-06	2.96E-06	X30 - X0_X3 - X0_X7 - X0	hematological and neurological expressed 1b [Source:ZFIN;Acc:ZDB-GENE-030131-2784]	3	6969960	7007090	1	1	KNOWN	0.83290936	-1.109055935	0.276146575	3	NA
ENSDARG00000029500	rpl34	ENSDARG00000029500	7200.179102	1.518615834	2.887914384	2.452402216	0.00106213	1.37E-06	4.68E-06	X30 - X0_X3 - X0_X7 - X0	ribosomal protein L34 [Source:ZFIN;Acc:ZDB-GENE-040426-1033]	7	60125197	60140343	1	4	KNOWN	0.859930125	-1.09734062	0.237410496	3	NA
ENSDARG00000029533	rpl18	ENSDARG00000029533	9635.153757	1.484077341	2.885553141	2.432449176	0.001980168	1.88E-06	6.90E-06	X30 - X0_X3 - X0_X7 - X0	ribosomal protein L18 [Source:ZFIN;Acc:ZDB-GENE-040801-165]	16	19039486	19053508	1	3	KNOWN	0.86439508	-1.095232878	0.230837798	3	NA
ENSDARG00000029581	tbc1d7	ENSDARG00000029581	349.3195626	-1.34168511	-1.466698593	-1.287853477	0.01843867	0.004285935	0.031834041	X30 - X0_X3 - X0_X7 - X0	TBC1 domain family, member 7 [Source:ZFIN;Acc:ZDB-GENE-040426-1747]	20	53166852	53188976	-1	1	KNOWN	-1.10389945	0.258599248	0.845300203	8	NA
ENSDARG00000029720	si:dkeyp-9d4.2	ENSDARG00000029720	40.86762708	14.86711779	8.254259708	17.08218332	0.000218168	0.002074951	0.00012644	X30 - X0_X3 - X0_X7 - X0	si:dkeyp-9d4.2 [Source:ZFIN;Acc:ZDB-GENE-090312-156]	1	6893923	6897901	1	2	KNOWN	-1.120625736	0.319172929	0.801452807	8	NA
ENSDARG00000029738	fbln1	ENSDARG00000029738	267.7438944	4.843320442	9.759364159	10.9686327	0.000253498	9.58E-06	6.62E-06	X30 - X0_X3 - X0_X7 - X0	fibulin 1 [Source:ZFIN;Acc:ZDB-GENE-990415-73]	25	1821012	1850616	-1	2	KNOWN	0.380860963	-1.134468985	0.753608021	4	NA
ENSDARG00000029856	cnn3b	ENSDARG00000029856	544.169207	1.484479073	2.021450721	2.099607941	0.026345758	0.000811967	0.00058115	X30 - X0_X3 - X0_X7 - X0	calponin 3, acidic b [Source:ZFIN;Acc:ZDB-GENE-050522-263]	2	14868993	14895878	1	2	KNOWN	0.456707939	-1.146811042	0.690103103	4	NA
ENSDARG00000029925	dlg1l	ENSDARG00000029925	3358.170077	-1.285360686	-2.202304942	-1.929749884	0.033403731	2.73E-05	9.48E-05	X30 - X0_X3 - X0_X7 - X0	discs, large (Drosophila) homolog 1, like [Source:ZFIN;Acc:ZDB-GENE-050222-3]	2	4788963	4963219	-1	7	KNOWN	-0.842058109	1.105283105	-0.263224996	1	NA
ENSDARG00000029944	parpbp	ENSDARG00000029944	84.82319762	2.315167613	15.41501248	7.742055722	0.003115914	1.69E-07	2.06E-06	X30 - X0_X3 - X0_X7 - X0	PARP1 binding protein [Source:ZFIN;Acc:ZDB-GENE-060421-5714]	4	16406919	16421290	-1	2	KNOWN	1.052010663	-0.93826153	-0.113749133	2	NA
ENSDARG00000030006	SLC6A7	ENSDARG00000030006	7.620744773	6.255564864	12.2216782	6.908311282	0.018699459	0.000872723	0.014300491	X30 - X0_X3 - X0_X7 - X0	solute carrier family 6 (neurotransmitter transporter, L-proline), member 7 [Source:HGNC Symbol;Acc:11054]	21	29557405	29593955	1	2	KNOWN_BY_PROJECTION	1.148943304	-0.674206118	-0.474737186	2	NA
ENSDARG00000030058	tbx4	ENSDARG00000030058	312.4592685	1.443737158	1.309844564	1.442898499	0.006244434	0.028622365	0.006326035	X30 - X0_X3 - X0_X7 - X0	T-box 4 [Source:ZFIN;Acc:ZDB-GENE-991124-5]	15	26736443	26760093	1	1	KNOWN	-1.154683443	0.58278318	0.571900263	6	NA
ENSDARG00000030092	tram2	ENSDARG00000030092	132.022957	2.040557159	9.832332889	4.994041707	0.016696496	2.30E-06	4.88E-05	X30 - X0_X3 - X0_X7 - X0	translocation associated membrane protein 2 [Source:ZFIN;Acc:ZDB-GENE-040426-2024]	20	47841168	47864410	1	2	KNOWN	1.070245303	-0.910530754	-0.15971455	2	NA
ENSDARG00000030097	sdcbp	ENSDARG00000030097	1060.151124	-1.206714651	-1.829527568	-1.677409315	0.039134111	2.93E-05	8.99E-05	X30 - X0_X3 - X0_X7 - X0	syndecan binding protein (syntenin) [Source:ZFIN;Acc:ZDB-GENE-081104-57]	7	59500118	59514763	-1	2	KNOWN	-0.795529995	1.122574642	-0.327044647	1	NA
ENSDARG00000030106	stmn4	ENSDARG00000030106	7516.044577	1.359467629	2.297621123	2.497365595	0.024560526	4.63E-05	2.65E-05	X30 - X0_X3 - X0_X7 - X0	stathmin-like 4 [Source:ZFIN;Acc:ZDB-GENE-040426-2732]	20	34798254	34893422	-1	3	KNOWN	0.405116589	-1.138993243	0.733876653	4	NA
ENSDARG00000030114	vps4a	ENSDARG00000030114	182.2139849	-1.227898396	-1.371581299	-1.462379412	0.036655424	0.004186127	0.001382659	X30 - X0_X3 - X0_X7 - X0	vacuolar protein sorting 4a (yeast) [Source:ZFIN;Acc:ZDB-GENE-060929-388]	25	36003708	36008561	1	1	KNOWN	-0.149101064	1.066178817	-0.917077752	7	NA
ENSDARG00000030155	ssbp3b	ENSDARG00000030155	964.6471671	1.273016894	1.456001154	1.797801741	0.020444042	0.001546787	7.41E-05	X30 - X0_X3 - X0_X7 - X0	single stranded DNA binding protein 3b [Source:ZFIN;Acc:ZDB-GENE-040426-2801]	8	18530378	18556039	1	4	KNOWN	-0.19874334	-0.885704882	1.084448222	5	NA
ENSDARG00000030241	vbp1	ENSDARG00000030241	1021.215131	1.273662439	2.176131671	1.833131616	0.008297012	2.66E-06	1.67E-05	X30 - X0_X3 - X0_X7 - X0	von Hippel-Lindau binding protein 1 [Source:ZFIN;Acc:ZDB-GENE-050522-494]	7	25054643	25061875	-1	2	KNOWN	0.911348147	-1.069745255	0.158397108	3	NA
ENSDARG00000030307	hspa12b	ENSDARG00000030307	155.8379557	2.028913935	3.837013869	4.412315885	0.014434449	0.000191823	8.99E-05	X30 - X0_X3 - X0_X7 - X0	heat shock protein 12B [Source:ZFIN;Acc:ZDB-GENE-070226-1]	7	60587256	60624541	1	3	KNOWN	0.330410237	-1.123391847	0.79298161	4	NA
ENSDARG00000030408	rps26l	ENSDARG00000030408	4088.856041	1.516449269	2.979869302	2.392528284	0.005178814	6.83E-06	3.83E-05	X30 - X0_X3 - X0_X7 - X0	ribosomal protein S26, like [Source:ZFIN;Acc:ZDB-GENE-040426-1706]	6	49466043	49471398	-1	1	KNOWN	0.928229096	-1.058919607	0.130690511	3	NA
ENSDARG00000030537	psmc1a	ENSDARG00000030537	1833.515848	1.191489038	2.31849203	1.53490545	0.02758339	9.23E-07	0.00011912	X30 - X0_X3 - X0_X7 - X0	proteasome (prosome, macropain) 26S subunit, ATPase, 1a [Source:ZFIN;Acc:ZDB-GENE-030131-8730]	17	8744494	8786899	1	2	KNOWN	1.102506661	-0.848506247	-0.254000414	2	NA
ENSDARG00000030547	rnd1	ENSDARG00000030547	7116.011285	-1.321983673	-2.537157593	-2.285864206	0.041830193	2.28E-05	5.55E-05	X30 - X0_X3 - X0_X7 - X0	Rho family GTPase 1 [Source:ZFIN;Acc:ZDB-GENE-040630-6]	23	17971555	17985496	1	2	KNOWN	-0.762041063	1.132332759	-0.370291696	1	NA
ENSDARG00000030573	nudt1	ENSDARG00000030573	90.47763541	1.619056386	2.863639037	2.696862286	0.03738746	0.000206487	0.000320041	X30 - X0_X3 - X0_X7 - X0	nudix (nucleoside diphosphate linked moiety X)-type motif 1 [Source:ZFIN;Acc:ZDB-GENE-040426-2757]	3	42115948	42120437	-1	1	KNOWN	0.69636721	-1.145870594	0.449503384	3	NA
ENSDARG00000030585	rpl13	ENSDARG00000030585	9518.285383	1.560851694	3.069577116	2.527681961	0.001360907	1.91E-06	7.83E-06	X30 - X0_X3 - X0_X7 - X0	ribosomal protein L13 [Source:ZFIN;Acc:ZDB-GENE-031007-1]	7	69521681	69530454	1	3	KNOWN	0.894368546	-1.079702002	0.185333456	3	NA
ENSDARG00000030602	rps19	ENSDARG00000030602	7074.916966	1.429056212	2.875450369	2.339436916	0.009899267	6.51E-06	3.35E-05	X30 - X0_X3 - X0_X7 - X0	ribosomal protein S19 [Source:ZFIN;Acc:ZDB-GENE-040426-1716]	16	26429258	26434619	-1	2	KNOWN	0.903689737	-1.074346791	0.170657054	3	NA
ENSDARG00000030630	mfsd2aa	ENSDARG00000030630	139.1755127	2.406534482	2.248637575	2.42277159	0.000143178	0.000256062	0.000148663	X30 - X0_X3 - X0_X7 - X0	major facilitator superfamily domain containing 2aa [Source:ZFIN;Acc:ZDB-GENE-041114-166]	13	36327089	36355195	1	1	KNOWN	-1.15058059	0.490891072	0.659689519	6	NA
ENSDARG00000030737	znf326	ENSDARG00000030737	44.77025923	1.744796898	3.164432903	2.095515153	0.010755374	5.70E-05	0.001693413	X30 - X0_X3 - X0_X7 - X0	zinc finger protein 326 [Source:ZFIN;Acc:ZDB-GENE-070424-227]	6	21370289	21378274	-1	2	KNOWN	1.121763412	-0.798021192	-0.323742219	2	NA
ENSDARG00000030743	sptlc3	ENSDARG00000030743	38.50118264	4.415652602	16.33126111	9.647574456	0.000982979	2.61E-06	2.18E-05	X30 - X0_X3 - X0_X7 - X0	serine palmitoyltransferase, long chain base subunit 3 [Source:ZFIN;Acc:ZDB-GENE-041210-281]	13	35025204	35083413	-1	2	KNOWN	1.038047398	-0.957022786	-0.081024612	2	NA
ENSDARG00000030753	prrg4	ENSDARG00000030753	56.74709366	2.382013074	5.189998958	4.415393799	0.000951053	4.42E-06	1.10E-05	X30 - X0_X3 - X0_X7 - X0	proline rich Gla (G-carboxyglutamic acid) 4 (transmembrane) [Source:ZFIN;Acc:ZDB-GENE-050417-112]	18	44080553	44089051	1	4	KNOWN	0.823439412	-1.112762252	0.289322839	3	NA
ENSDARG00000030756	dnmt1	ENSDARG00000030756	592.2512132	1.23265678	2.941323289	2.12366809	0.015160821	2.10E-07	2.66E-06	X30 - X0_X3 - X0_X7 - X0	DNA (cytosine-5-)-methyltransferase 1 [Source:ZFIN;Acc:ZDB-GENE-990714-15]	3	55442890	55458859	-1	3	KNOWN	0.985386749	-1.013999154	0.028612405	2	NA
ENSDARG00000030781	acads	ENSDARG00000030781	209.5683432	1.278018317	2.532943464	1.963174958	0.045166442	8.88E-06	0.000102282	X30 - X0_X3 - X0_X7 - X0	acyl-Coenzyme A dehydrogenase, C-2 to C-3 short chain [Source:ZFIN;Acc:ZDB-GENE-040808-64]	10	45501403	45519840	-1	6	KNOWN	0.967987581	-1.029200203	0.061212621	2	NA
ENSDARG00000030954	ftr56	ENSDARG00000030954	65.24808559	5.853466514	8.112468227	11.12876302	0.001176263	0.000222571	6.53E-05	X30 - X0_X3 - X0_X7 - X0	finTRIM family, member 56 [Source:ZFIN;Acc:ZDB-GENE-030131-2801]	19	13020670	13026716	-1	2	KNOWN	-0.095376044	-0.948894919	1.044270963	4	NA
ENSDARG00000031047	ptrh1	ENSDARG00000031047	146.5508491	1.391341525	2.966689067	1.857540658	0.025079918	7.19E-06	0.000542725	X30 - X0_X3 - X0_X7 - X0	peptidyl-tRNA hydrolase 1 homolog (S. cerevisiae) [Source:ZFIN;Acc:ZDB-GENE-050306-33]	5	67596218	67602349	1	3	KNOWN	1.105760555	-0.840925755	-0.2648348	2	NA
ENSDARG00000031051	il4r	ENSDARG00000031051	169.4724523	4.404120798	24.55558648	12.20606457	0.000451556	5.90E-07	4.92E-06	X30 - X0_X3 - X0_X7 - X0	interleukin 4 receptor [Source:ZFIN;Acc:ZDB-GENE-050227-5]	3	42549885	42560945	1	3	KNOWN	1.066211561	-0.917025929	-0.149185632	2	NA
ENSDARG00000031095	veph	ENSDARG00000031095	59.61487426	-1.370883369	-1.984943876	-2.677083056	0.04452254	0.000689009	6.35E-05	X30 - X0_X3 - X0_X7 - X0	ventricular zone expressed PH domain protein [Source:ZFIN;Acc:ZDB-GENE-041014-375]	18	39654310	39805917	1	1	KNOWN	0.039826589	0.97949172	-1.019318309	7	NA
ENSDARG00000031108	lrba	ENSDARG00000031108	1626.154415	-1.217391906	-1.575405616	-1.500100495	0.025004313	0.000144045	0.00031744	X30 - X0_X3 - X0_X7 - X0	LPS-responsive vesicle trafficking, beach and anchor containing [Source:ZFIN;Acc:ZDB-GENE-090311-19]	1	22694787	23124646	-1	3	KNOWN	-0.765226056	1.131493401	-0.366267345	1	NA
ENSDARG00000031153	mrps15	ENSDARG00000031153	948.897043	1.349488204	3.235724104	1.955263822	0.015158886	1.52E-06	9.78E-05	X30 - X0_X3 - X0_X7 - X0	mitochondrial ribosomal protein S15 [Source:ZFIN;Acc:ZDB-GENE-040718-188]	Zv9_scaffold3563	240877	261913	1	1	KNOWN	1.096100777	-0.862569569	-0.233531208	2	NA
ENSDARG00000031246	hbegfb	ENSDARG00000031246	105.2319812	2.301777117	17.36496539	9.407097828	0.011134465	5.36E-07	4.82E-06	X30 - X0_X3 - X0_X7 - X0	heparin-binding EGF-like growth factor b [Source:ZFIN;Acc:ZDB-GENE-070820-6]	21	28905356	28913008	-1	2	KNOWN	1.018322485	-0.98061059	-0.037711894	2	NA
ENSDARG00000031307	zic4	ENSDARG00000031307	23.26549103	1.950702277	4.207958332	2.512149388	0.036778216	0.000158212	0.005534685	X30 - X0_X3 - X0_X7 - X0	zic family member 4 [Source:ZFIN;Acc:ZDB-GENE-040622-4]	24	5057582	5062137	1	2	KNOWN	1.121271367	-0.799514087	-0.32175728	2	NA
ENSDARG00000031422	igfbp2b	ENSDARG00000031422	45.70208009	1.831767247	1.876100267	2.862737777	0.018688689	0.013367473	0.000458656	X30 - X0_X3 - X0_X7 - X0	insulin-like growth factor binding protein 2b [Source:ZFIN;Acc:ZDB-GENE-090107-3]	9	47794282	47848554	1	1	KNOWN	-0.538901671	-0.614963514	1.153865185	5	NA
ENSDARG00000031483	col9a1	ENSDARG00000031483	296.7675518	4.802692445	15.94529279	19.82145612	0.017545297	0.000133322	8.29E-05	X30 - X0_X3 - X0_X7 - X0	collagen, type IX, alpha 1 [Source:ZFIN;Acc:ZDB-GENE-040426-2410]	13	39679469	39719819	-1	2	KNOWN	0.310656857	-1.118458346	0.807801489	4	NA
ENSDARG00000031506	flvcr2b	ENSDARG00000031506	164.9487426	2.71297637	19.32437807	8.004355491	0.000458031	6.17E-08	1.06E-06	X30 - X0_X3 - X0_X7 - X0	feline leukemia virus subgroup C cellular receptor family, member 2b [Source:ZFIN;Acc:ZDB-GENE-041210-312]	20	46562239	46600061	1	1	KNOWN	1.097148046	-0.860342564	-0.236805482	2	NA
ENSDARG00000031511	psmb2	ENSDARG00000031511	1718.524891	1.179369131	2.366039335	1.572414284	0.049354944	1.30E-06	0.000138254	X30 - X0_X3 - X0_X7 - X0	proteasome (prosome, macropain) subunit, beta type, 2 [Source:ZFIN;Acc:ZDB-GENE-040718-353]	19	49312244	49329959	1	1	KNOWN	1.091976742	-0.871088503	-0.220888239	2	NA
ENSDARG00000031622	nrp2a	ENSDARG00000031622	107.706225	1.930679533	2.656193391	2.612692357	0.00066861	3.54E-05	3.96E-05	X30 - X0_X3 - X0_X7 - X0	neuropilin 2a [Source:ZFIN;Acc:ZDB-GENE-040611-2]	1	4497088	4565764	-1	3	KNOWN	0.920329665	-0.962717815	0.807424154	3	NA
ENSDARG00000031651	slc29a1a	ENSDARG00000031651	702.7316678	2.871791943	6.915762558	6.496127224	0.000161282	1.42E-06	1.85E-06	X30 - X0_X3 - X0_X7 - X0	solute carrier family 29 (nucleoside transporters), member 1a [Source:ZFIN;Acc:ZDB-GENE-050913-138]	13	47172771	47223280	1	2	KNOWN	0.669134869	-1.149548352	0.480413483	3	NA
ENSDARG00000031678	col5a2a	ENSDARG00000031678	578.4131973	2.71177018	8.897617419	12.83572009	0.009651071	3.44E-05	1.18E-05	X30 - X0_X3 - X0_X7 - X0	collagen, type V, alpha 2a [Source:ZFIN;Acc:ZDB-GENE-030616-13]	9	43726088	43769614	-1	4	KNOWN	0.146813735	-1.065291082	0.918477347	4	NA
ENSDARG00000031715	lyn	ENSDARG00000031715	368.485776	3.540752417	11.30944262	8.052236876	5.39E-05	3.38E-07	1.13E-06	X30 - X0_X3 - X0_X7 - X0	v-yes-1 Yamaguchi sarcoma viral related oncogene homolog [Source:ZFIN;Acc:ZDB-GENE-040912-7]	2	27725640	27757359	-1	1	KNOWN	0.94209821	-1.049268978	0.107170768	2	NA
ENSDARG00000031720	clstn1	ENSDARG00000031720	28307.07033	-1.214619419	-1.901860707	-1.672499036	0.036138172	2.06E-05	0.000102636	X30 - X0_X3 - X0_X7 - X0	calsyntenin 1 [Source:ZFIN;Acc:ZDB-GENE-040426-1064]	23	29823476	29910614	-1	5	KNOWN	-0.873215951	1.090917098	-0.217701147	1	NA
ENSDARG00000031731	si:ch73-27e22.6	ENSDARG00000031731	6.233261116	3.96553358	3.901670721	3.443414326	0.033069354	0.021324827	0.037194933	X30 - X0_X3 - X0_X7 - X0	si:ch73-27e22.6 [Source:ZFIN;Acc:ZDB-GENE-070705-234]	22	8634968	8765640	1	2	KNOWN	0.461593596	0.685826633	-1.147420229	7	NA
ENSDARG00000031745	si:busm1-266f07.2	ENSDARG00000031745	1241.690148	4.355361478	3.295223787	5.599676798	0.000217737	0.000651036	4.94E-05	X30 - X0_X3 - X0_X7 - X0	si:busm1-266f07.2 [Source:ZFIN;Acc:ZDB-GENE-030616-436]	8	37539907	37543263	1	1	KNOWN	-0.972324582	-0.053225029	1.025549611	8	NA
ENSDARG00000031749	C3AR1	ENSDARG00000031749	11.40200157	2.608048375	10.94917275	3.682810428	0.038246908	2.03E-05	0.005707932	X30 - X0_X3 - X0_X7 - X0	C3a anaphylatoxin chemotactic receptor [Source:UniProtKB/Swiss-Prot;Acc:P0C7U4]	10	1928072	1929034	1	1	KNOWN	1.146573813	-0.691719879	-0.454853934	2	NA
ENSDARG00000031751	npr1a	ENSDARG00000031751	104.5283393	1.871561621	5.474204614	3.620221827	0.006532745	2.51E-06	2.46E-05	X30 - X0_X3 - X0_X7 - X0	natriuretic peptide receptor 1a [Source:ZFIN;Acc:ZDB-GENE-060503-539]	19	26909255	27114782	1	2	KNOWN	1.009601133	-0.990114036	-0.019487097	2	NA
ENSDARG00000031761	dab2	ENSDARG00000031761	281.914791	-1.536680119	-2.266553761	-2.225694752	0.031171599	0.001066362	0.001117912	X30 - X0_X3 - X0_X7 - X0	disabled homolog 2 (Drosophila) [Source:ZFIN;Acc:ZDB-GENE-040303-1]	5	33961390	33976481	-1	5	KNOWN	-0.626448533	1.15326693	-0.526818397	1	NA
ENSDARG00000031777	pparaa	ENSDARG00000031777	434.0998768	-1.27990701	-2.351214204	-1.592237477	0.041579783	2.08E-05	0.001278024	X30 - X0_X3 - X0_X7 - X0	peroxisome proliferator-activated receptor alpha a [Source:ZFIN;Acc:ZDB-GENE-041210-169]	4	17677723	17703189	-1	2	KNOWN	-1.107344303	0.837117818	0.270226486	6	NA
ENSDARG00000031814	dhrs13b	ENSDARG00000031814	110.6729422	1.718319331	3.522893467	3.285919801	0.010423324	2.38E-05	3.74E-05	X30 - X0_X3 - X0_X7 - X0	dehydrogenase/reductase (SDR family) member 13b [Source:ZFIN;Acc:ZDB-GENE-040801-253]	15	23917052	23935907	1	7	KNOWN	0.693945608	-1.146240982	0.452295374	3	NA
ENSDARG00000031817	trim2a	ENSDARG00000031817	1222.247245	-1.332208002	-2.319451072	-1.817599512	0.019470855	1.80E-05	0.000216895	X30 - X0_X3 - X0_X7 - X0	tripartite motif-containing 2a [Source:ZFIN;Acc:ZDB-GENE-050327-99]	1	24179845	24227681	-1	1	KNOWN	-1.005510997	0.99439635	0.011114647	1	NA
ENSDARG00000031848	pparg	ENSDARG00000031848	186.2572695	2.747935313	28.51833664	12.93198657	0.001371031	6.17E-08	5.55E-07	X30 - X0_X3 - X0_X7 - X0	peroxisome proliferator activated receptor gamma [Source:ZFIN;Acc:ZDB-GENE-990415-213]	11	600187	629201	-1	1	KNOWN	1.062126304	-0.923384176	-0.138742127	2	NA
ENSDARG00000031885	psmb11	ENSDARG00000031885	179.837668	8.556036603	14.28289949	14.8540705	4.80E-07	8.57E-08	7.79E-08	X30 - X0_X3 - X0_X7 - X0	proteasome (prosome, macropain) subunit, beta type, 11 [Source:ZFIN;Acc:ZDB-GENE-001208-1]	19	7737759	7741992	1	2	KNOWN	0.493412516	-1.150812483	0.657399968	4	Yes
ENSDARG00000031952	mb	ENSDARG00000031952	4341.729218	-1.614069624	-2.407027925	-1.788253876	0.00108923	1.39E-05	0.00029446	X30 - X0_X3 - X0_X7 - X0	myoglobin [Source:ZFIN;Acc:ZDB-GENE-040426-1430]	1	55677271	55684413	1	5	KNOWN	-1.129202868	0.773588665	0.355614202	6	NA
ENSDARG00000032005	ccdc65	ENSDARG00000032005	6.015335753	4.844580845	12.8685667	6.348195471	0.000301951	1.09E-05	0.000150674	X30 - X0_X3 - X0_X7 - X0	coiled-coil domain containing 65 [Source:ZFIN;Acc:ZDB-GENE-030616-358]	6	7338713	7344327	1	1	KNOWN	1.136622494	-0.744569523	-0.392052971	2	NA
ENSDARG00000032083	dpysl2b	ENSDARG00000032083	1524.139303	1.507690112	2.526059594	2.453152122	0.011344697	5.21E-05	7.64E-05	X30 - X0_X3 - X0_X7 - X0	dihydropyrimidinase-like 2b [Source:ZFIN;Acc:ZDB-GENE-031105-1]	10	18977784	19023153	1	3	KNOWN	0.640330396	-1.152320675	0.511990279	3	NA
ENSDARG00000032155	ppm1aa	ENSDARG00000032155	627.6493706	-1.231533788	-1.378010111	-1.469967904	0.039131167	0.00444373	0.001402405	X30 - X0_X3 - X0_X7 - X0	protein phosphatase, Mg2+/Mn2+ dependent, 1Aa [Source:ZFIN;Acc:ZDB-GENE-991102-15]	13	31769414	31803792	1	3	KNOWN	-0.151123773	1.066960497	-0.915836723	7	NA
ENSDARG00000032161	srgap2a	ENSDARG00000032161	931.4710894	1.377696081	2.10096637	2.041894206	0.027218996	0.000207943	0.000283924	X30 - X0_X3 - X0_X7 - X0	SLIT-ROBO Rho GTPase activating protein 2a [Source:ZFIN;Acc:ZDB-GENE-060915-2]	11	22239998	22418377	-1	3	KNOWN	0.64933006	-1.151573643	0.502243583	3	NA
ENSDARG00000032188	lrrc8a	ENSDARG00000032188	229.2850886	1.415014103	2.889996417	2.240878557	0.010491016	4.77E-06	4.00E-05	X30 - X0_X3 - X0_X7 - X0	leucine rich repeat containing 8 family, member A [Source:ZFIN;Acc:ZDB-GENE-030131-5853]	21	4514314	4562968	1	1	KNOWN	0.957767405	-1.037463329	0.079695924	2	NA
ENSDARG00000032218	acss3	ENSDARG00000032218	164.3798189	1.585516743	3.811214207	2.403680199	0.016429209	7.59E-06	0.000195744	X30 - X0_X3 - X0_X7 - X0	acyl-CoA synthetase short-chain family member 3 [Source:ZFIN;Acc:ZDB-GENE-060503-816]	4	20802965	20893985	1	2	KNOWN	1.075767943	-0.901260497	-0.174507446	2	NA
ENSDARG00000032221	phactr4b	ENSDARG00000032221	1248.656923	-1.244837597	-1.433799016	-1.244741161	0.034340809	0.00245082	0.033823084	X30 - X0_X3 - X0_X7 - X0	phosphatase and actin regulator 4b [Source:ZFIN;Acc:ZDB-GENE-040426-1131]	16	36615379	36702455	-1	4	KNOWN	-1.154700426	0.576908352	0.577792074	6	NA
ENSDARG00000032238	dnm3	ENSDARG00000032238	92.86270506	3.259995503	12.29296684	8.897094976	0.001604618	2.13E-06	8.10E-06	X30 - X0_X3 - X0_X7 - X0	dynamin 3 [Source:ZFIN;Acc:ZDB-GENE-040724-76]	20	14733655	14840055	-1	3	KNOWN	0.908025273	-1.071764672	0.163739399	3	NA
ENSDARG00000032264	mybl2	ENSDARG00000032264	147.9565858	11.04594297	66.61599474	34.75653352	2.02E-05	6.69E-08	3.08E-07	X30 - X0_X3 - X0_X7 - X0	myeloblastosis oncogene-like 2 [Source:ZFIN;Acc:ZDB-GENE-041007-1]	11	1516878	1539928	1	3	KNOWN	1.045141423	-0.947728982	-0.097412441	2	NA
ENSDARG00000032318	mfsd6a	ENSDARG00000032318	38.92253459	4.38886781	20.49553311	14.0428705	0.008940747	2.07E-05	8.72E-05	X30 - X0_X3 - X0_X7 - X0	major facilitator superfamily domain containing 6a [Source:ZFIN;Acc:ZDB-GENE-050208-335]	22	13050529	13065034	-1	1	KNOWN	0.927659205	-1.059301096	0.131641891	3	NA
ENSDARG00000032348	CABZ01090712.1	ENSDARG00000032348	25.25182886	2.652665452	3.561542155	3.359395965	0.034414913	0.004628316	0.007031034	X30 - X0_X3 - X0_X7 - X0	Uncharacterized protein [Source:UniProtKB/TrEMBL;Acc:F1Q4N3]	18	286342	288193	1	1	NOVEL	0.776051182	-1.1285041	0.352452918	3	NA
ENSDARG00000032405	zgc:85975	ENSDARG00000032405	88.0838161	2.866513146	10.12769695	7.629774097	0.000470681	5.45E-07	1.77E-06	X30 - X0_X3 - X0_X7 - X0	zgc:85975 [Source:ZFIN;Acc:ZDB-GENE-040426-2417]	4	62059392	62063603	-1	1	KNOWN	0.881816443	-1.086508578	0.204692136	3	NA
ENSDARG00000032469	ampd3b	ENSDARG00000032469	101.9947057	2.730696302	10.3447059	8.412341802	0.000742389	5.84E-07	1.37E-06	X30 - X0_X3 - X0_X7 - X0	adenosine monophosphate deaminase 3b [Source:ZFIN;Acc:ZDB-GENE-030131-5929]	18	16421974	16454430	-1	4	KNOWN	0.803999866	-1.119766024	0.315766158	3	NA
ENSDARG00000032482	si:dkey-40c11.2	ENSDARG00000032482	92.98900097	2.192414967	7.119268799	7.0543815	0.046197922	5.38E-05	5.78E-05	X30 - X0_X3 - X0_X7 - X0	si:dkey-40c11.2 [Source:ZFIN;Acc:ZDB-GENE-060526-300]	5	45149007	45226862	1	3	KNOWN	0.588792734	-1.15462444	0.565831706	4	NA
ENSDARG00000032564	ass1	ENSDARG00000032564	32.671071	1.719944461	2.41877976	2.510973179	0.008075726	0.00023975	0.000182801	X30 - X0_X3 - X0_X7 - X0	argininosuccinate synthetase 1 [Source:ZFIN;Acc:ZDB-GENE-040912-178]	5	500770	542621	1	1	KNOWN	0.467492721	-1.148124792	0.680632072	4	NA
ENSDARG00000032575	ywhaz	ENSDARG00000032575	4080.138697	1.21692675	2.206719464	1.686180246	0.027136011	2.87E-06	6.14E-05	X30 - X0_X3 - X0_X7 - X0	tyrosine 3-monooxygenase/tryptophan 5-monooxygenase activation protein, zeta polypeptide [Source:ZFIN;Acc:ZDB-GENE-030131-8554]	19	12786554	12815748	-1	1	KNOWN	1.016816654	-0.982289028	-0.034527626	2	NA
ENSDARG00000032724	pmp22a	ENSDARG00000032724	118.9339479	3.696146718	11.7702121	12.49260861	0.009678942	7.64E-05	6.21E-05	X30 - X0_X3 - X0_X7 - X0	peripheral myelin protein 22a [Source:ZFIN;Acc:ZDB-GENE-030131-6757]	3	48058195	48062098	1	3	KNOWN	0.501805559	-1.15153777	0.64973221	4	NA
ENSDARG00000032725	rps27a	ENSDARG00000032725	11405.67892	1.430488667	2.844681638	2.208832411	0.007116451	4.33E-06	3.36E-05	X30 - X0_X3 - X0_X7 - X0	ribosomal protein S27a [Source:ZFIN;Acc:ZDB-GENE-030131-10018]	6	6187548	6190332	1	1	KNOWN	0.964782096	-1.031842256	0.06706016	2	NA
ENSDARG00000032768	irf1b	ENSDARG00000032768	433.5769137	6.555512856	8.153180941	7.591943906	2.17E-06	8.92E-07	1.13E-06	X30 - X0_X3 - X0_X7 - X0	interferon regulatory factor 1b [Source:ZFIN;Acc:ZDB-GENE-041114-13]	21	44267649	44273778	1	1	KNOWN	0.887861166	-1.083287222	0.195426056	3	Yes
ENSDARG00000032826	ccr8.1	ENSDARG00000032826	13.49587594	2.01893553	3.073660629	3.596844835	0.036585269	0.002013473	0.000745741	X30 - X0_X3 - X0_X7 - X0	chemokine (C-C motif) receptor 8.1 [Source:ZFIN;Acc:ZDB-GENE-070302-1]	16	11002252	11005272	1	1	KNOWN	-0.653059992	-0.897043253	-0.532034913	12	NA
ENSDARG00000032831	htra1a	ENSDARG00000032831	344.7040015	1.653789112	2.342287658	2.319580068	0.003417072	9.95E-05	0.000112155	X30 - X0_X3 - X0_X7 - X0	HtrA serine peptidase 1a [Source:ZFIN;Acc:ZDB-GENE-040704-64]	17	21749146	21789571	1	1	KNOWN	0.606136286	-1.154213901	0.548077615	4	NA
ENSDARG00000033042	ptprja	ENSDARG00000033042	55.00020658	4.607130215	10.39765804	11.11799139	0.001150059	2.89E-05	2.20E-05	X30 - X0_X3 - X0_X7 - X0	protein tyrosine phosphatase, receptor type, J a [Source:ZFIN;Acc:ZDB-GENE-030131-8301]	7	40945772	41003835	-1	5	KNOWN	0.473497288	-1.148806887	0.675309599	4	NA
ENSDARG00000033046	ccni2	ENSDARG00000033046	6.093449046	5.912617877	5.429255551	8.755674872	0.002046153	0.003092979	0.000304951	X30 - X0_X3 - X0_X7 - X0	cyclin I family, member 2 [Source:ZFIN;Acc:ZDB-GENE-081106-2]	21	41785656	41803900	-1	1	KNOWN	-0.706575821	-0.437637469	1.144213291	5	NA
ENSDARG00000033144	psme2	ENSDARG00000033144	754.3547735	4.494636732	14.69632866	10.48513861	3.38E-07	9.62E-09	2.00E-08	X30 - X0_X3 - X0_X7 - X0	proteasome activator subunit 2 [Source:ZFIN;Acc:ZDB-GENE-991110-16]	12	14425176	14438024	1	1	KNOWN	0.937122963	-1.052813494	0.115690531	2	Yes
ENSDARG00000033175	snrpe	ENSDARG00000033175	833.2098297	1.200270313	2.028803795	1.446931577	0.016607859	1.87E-06	0.00020788	X30 - X0_X3 - X0_X7 - X0	small nuclear ribonucleoprotein polypeptide E [Source:ZFIN;Acc:ZDB-GENE-040426-1112]	11	38886328	38891977	1	1	KNOWN	1.10511265	-0.842460659	-0.262651991	2	NA
ENSDARG00000033227	lect2l	ENSDARG00000033227	172.6040248	11.39532751	47.50222467	60.76777967	0.000437184	4.75E-06	2.85E-06	X30 - X0_X3 - X0_X7 - X0	leukocyte cell-derived chemotaxin 2 like [Source:ZFIN;Acc:ZDB-GENE-070127-4]	14	38206899	38208441	1	1	KNOWN	0.297976047	-1.115118298	0.817142251	4	NA
ENSDARG00000033234	stmn2a	ENSDARG00000033234	3763.664974	1.41288833	1.851646164	2.162285522	0.00885235	0.000217912	4.75E-05	X30 - X0_X3 - X0_X7 - X0	stathmin-like 2a [Source:ZFIN;Acc:ZDB-GENE-041010-85]	16	18215815	18233105	-1	2	KNOWN	0.113423511	-1.051875727	0.938452216	4	NA
ENSDARG00000033273	CCDC111	ENSDARG00000033273	64.25028669	6.98228796	36.35634277	18.91872448	7.83E-05	1.38E-07	1.05E-06	X30 - X0_X3 - X0_X7 - X0	coiled-coil domain containing 111 [Source:HGNC Symbol;Acc:26575]	1	20345963	20355665	1	3	KNOWN_BY_PROJECTION	1.056270122	-0.932140101	-0.12413002	2	NA
ENSDARG00000033320	sar1ab	ENSDARG00000033320	214.5265162	-1.33521206	-1.659492022	-1.4278717	0.017421366	0.000672405	0.005611457	X30 - X0_X3 - X0_X7 - X0	SAR1 gene homolog Ab (S. cerevisiae) [Source:ZFIN;Acc:ZDB-GENE-050417-437]	13	30368539	30374194	-1	2	KNOWN	-1.109391556	0.832072383	0.277319173	6	NA
ENSDARG00000033345	CNTLN	ENSDARG00000033345	68.58729288	1.594817424	2.399629252	1.727856928	0.035101276	0.000600627	0.013174874	X30 - X0_X3 - X0_X7 - X0	centlein, centrosomal protein [Source:HGNC Symbol;Acc:23432]	1	25793078	25980957	-1	4	KNOWN_BY_PROJECTION	1.140891605	-0.724636459	-0.416255146	2	NA
ENSDARG00000033355	PLA2G4C (1 of 5)	ENSDARG00000033355	72.75177983	110.4304125	132.2934809	47.5766315	0.033555216	0.005940247	0.043788807	X30 - X0_X3 - X0_X7 - X0	phospholipase A2, group IVC (cytosolic, calcium-independent) [Source:HGNC Symbol;Acc:9037]	5	1986792	2011161	1	1	KNOWN_BY_PROJECTION	0.807787536	0.310675664	-1.1184632	10	NA
ENSDARG00000033446	si:dkey-57h18.2	ENSDARG00000033446	292.640432	1.483474607	2.352638668	2.028032817	0.020117646	0.000127151	0.000530521	X30 - X0_X3 - X0_X7 - X0	si:dkey-57h18.2 [Source:ZFIN;Acc:ZDB-GENE-130531-48]	12	28117851	28130681	-1	2	KNOWN	0.9060267	-1.072962311	0.166935611	3	NA
ENSDARG00000033567	fkbp1ab	ENSDARG00000033567	459.5053044	1.55777759	1.762638643	2.895398151	0.001302811	0.000247485	2.57E-06	X30 - X0_X3 - X0_X7 - X0	FK506 binding protein 1Ab [Source:ZFIN;Acc:ZDB-GENE-040927-9]	23	16859138	16863030	-1	1	KNOWN	-0.429310733	-0.713659893	1.142970626	5	NA
ENSDARG00000033662	scd	ENSDARG00000033662	252.8313314	1.59537287	1.754858938	2.096133452	0.01036912	0.00364419	0.000708762	X30 - X0_X3 - X0_X7 - X0	stearoyl-CoA desaturase (delta-9-desaturase) [Source:ZFIN;Acc:ZDB-GENE-031106-3]	12	49684020	49699500	1	2	KNOWN	-0.236869644	-0.860298839	1.097168483	5	NA
ENSDARG00000033735	ncf1	ENSDARG00000033735	102.15558	5.001575277	3.40838018	4.428335819	2.54E-05	0.00024356	4.76E-05	X30 - X0_X3 - X0_X7 - X0	neutrophil cytosolic factor 1 [Source:ZFIN;Acc:ZDB-GENE-031006-6]	5	64495160	64508316	-1	1	KNOWN	-1.079411207	0.894886662	0.184524546	6	NA
ENSDARG00000033738	zgc:153867	ENSDARG00000033738	3880.742916	1.319962586	3.055647223	2.410613144	0.017668754	1.72E-06	1.01E-05	X30 - X0_X3 - X0_X7 - X0	zgc:153867 [Source:ZFIN;Acc:ZDB-GENE-030131-9170]	23	28617350	28631405	1	9	KNOWN	0.904537584	-1.073846478	0.169308894	3	NA
ENSDARG00000033757	ncaph2	ENSDARG00000033757	179.3821071	2.707776054	14.38733928	8.209820232	0.000111591	4.68E-08	2.41E-07	X30 - X0_X3 - X0_X7 - X0	non-SMC condensin II complex, subunit H2 [Source:ZFIN;Acc:ZDB-GENE-041210-172]	4	17510172	17520419	1	1	KNOWN	1.018710239	-0.980175771	-0.038534468	2	NA
ENSDARG00000033760	pmelb	ENSDARG00000033760	3120.06055	2.292645366	2.651934424	4.667094357	0.000805218	0.000231216	9.26E-06	X30 - X0_X3 - X0_X7 - X0	premelanosome protein b [Source:ZFIN;Acc:ZDB-GENE-050912-2]	23	35724086	35741880	1	2	KNOWN	-0.431269764	-0.711999094	1.143268858	5	NA
ENSDARG00000033824	rnf213b	ENSDARG00000033824	195.3843916	8.153494419	6.007401682	14.16408877	0.001626584	0.00351174	0.000153342	X30 - X0_X3 - X0_X7 - X0	ring finger protein 213b [Source:ZFIN;Acc:ZDB-GENE-110822-1]	12	37723794	37878499	1	3	KNOWN	-0.812233275	-0.304663096	1.116896371	5	NA
ENSDARG00000033928	ndfip2	ENSDARG00000033928	7482.088717	-1.211152792	-1.801070701	-1.658741039	0.039307306	3.87E-05	0.000120411	X30 - X0_X3 - X0_X7 - X0	Nedd4 family interacting protein 2 [Source:ZFIN;Acc:ZDB-GENE-040426-2662]	1	4243643	4283906	-1	1	KNOWN	-0.792885303	1.123422481	-0.330537178	1	NA
ENSDARG00000033954	CABZ01020188.1	ENSDARG00000033954	588.8398913	-1.288446967	-2.159509237	-2.10651544	0.049308525	7.21E-05	9.24E-05	X30 - X0_X3 - X0_X7 - X0	Uncharacterized protein [Source:UniProtKB/TrEMBL;Acc:H9GX99]	Zv9_NA548	4744	22461	1	1	NOVEL	-0.630760024	1.152999463	-0.522239438	1	NA
ENSDARG00000033967	trmt2b	ENSDARG00000033967	63.66646183	1.602660411	4.300053552	3.381965003	0.032013029	1.28E-05	5.75E-05	X30 - X0_X3 - X0_X7 - X0	TRM2 tRNA methyltransferase 2 homolog B (S. cerevisiae) [Source:ZFIN;Acc:ZDB-GENE-050809-101]	13	30256638	30258356	-1	2	KNOWN	0.878769015	-1.088093813	0.209324798	3	NA
ENSDARG00000034056	csnk1g2b	ENSDARG00000034056	2604.802227	-1.192463179	-1.447905827	-1.640445237	0.042095512	0.000623262	8.31E-05	X30 - X0_X3 - X0_X7 - X0	casein kinase 1, gamma 2b [Source:ZFIN;Acc:ZDB-GENE-060825-285]	8	21033907	21097973	1	3	KNOWN	-0.09330366	1.043381894	-0.950078234	7	NA
ENSDARG00000034063	CABZ01068208.1	ENSDARG00000034063	81.01653068	5.238000857	13.36421797	11.81675264	0.000119654	1.72E-06	2.88E-06	X30 - X0_X3 - X0_X7 - X0	Uncharacterized protein [Source:UniProtKB/TrEMBL;Acc:E7FED8]	17	53861669	53868596	-1	1	KNOWN	0.747308834	-1.135984483	0.38867565	3	NA
ENSDARG00000034092	CABZ01058863.1	ENSDARG00000034092	24.98727261	4.359484317	25.08727671	11.82671092	0.004641713	1.22E-06	2.52E-05	X30 - X0_X3 - X0_X7 - X0	Uncharacterized protein [Source:UniProtKB/TrEMBL;Acc:E7EZL5]	1	58174835	58183630	-1	1	NOVEL	1.079204788	-0.895253585	-0.183951203	2	NA
ENSDARG00000034211	capn2l	ENSDARG00000034211	10.03694599	5.357797326	6.326855873	10.38778186	0.045762446	0.020927635	0.00302622	X30 - X0_X3 - X0_X7 - X0	calpain 2, (m/II) large subunit, like [Source:ZFIN;Acc:ZDB-GENE-050417-341]	22	27178583	27208528	-1	1	KNOWN	-0.386192664	-0.749316221	1.135508885	5	NA
ENSDARG00000034229	kcnip3a	ENSDARG00000034229	382.8195479	-1.397348417	-2.108900671	-2.072862388	0.003142883	1.52E-05	1.77E-05	X30 - X0_X3 - X0_X7 - X0		8	44804665	44948255	1	4	KNOWN	-0.621722605	1.153533096	-0.531810491	1	NA
ENSDARG00000034291	rpl37	ENSDARG00000034291	5425.680421	1.55375832	3.030045746	2.607952433	0.000916067	1.27E-06	3.72E-06	X30 - X0_X3 - X0_X7 - X0	ribosomal protein L37 [Source:ZFIN;Acc:ZDB-GENE-040625-39]	21	5433893	5444944	-1	4	KNOWN	0.832225489	-1.10933028	0.277104791	3	NA
ENSDARG00000034555	PARD3B (1 of 2)	ENSDARG00000034555	143.9622781	1.863892697	4.269228964	3.298780082	0.002695362	4.07E-06	2.05E-05	X30 - X0_X3 - X0_X7 - X0	par-3 partitioning defective 3 homolog B (C. elegans) [Source:HGNC Symbol;Acc:14446]	9	14842567	15484361	-1	5	KNOWN_BY_PROJECTION	0.929877575	-1.057809576	0.127932001	3	NA
ENSDARG00000034624	nuf2	ENSDARG00000034624	130.5581058	8.086023634	51.84324801	29.51151059	0.005372957	6.33E-06	3.00E-05	X30 - X0_X3 - X0_X7 - X0	NUF2, NDC80 kinetochore complex component, homolog [Source:ZFIN;Acc:ZDB-GENE-040426-1121]	11	416541	425283	-1	3	KNOWN	1.00683165	-0.993025386	-0.013806264	2	NA
ENSDARG00000034643	fhl3a	ENSDARG00000034643	314.5809634	1.744589764	7.559218584	4.913590355	0.019672525	2.33E-06	1.80E-05	X30 - X0_X3 - X0_X7 - X0	four and a half LIM domains 3a [Source:ZFIN;Acc:ZDB-GENE-030131-4741]	16	35969551	36050492	1	3	KNOWN	0.968689675	-1.028615207	0.059925532	2	NA
ENSDARG00000034650	fabp7b	ENSDARG00000034650	85.33612779	3.676723006	11.23311895	7.156762787	0.000674311	2.99E-06	2.25E-05	X30 - X0_X3 - X0_X7 - X0	fatty acid binding protein 7, brain, b [Source:ZFIN;Acc:ZDB-GENE-040614-4]	20	40400988	40402467	-1	1	KNOWN	1.025241561	-0.972685783	-0.052555778	2	NA
ENSDARG00000034753	tspan3a	ENSDARG00000034753	5813.891279	-1.26214261	-1.998047374	-1.651350539	0.035135228	4.03E-05	0.000381131	X30 - X0_X3 - X0_X7 - X0	tetraspanin 3a [Source:ZFIN;Acc:ZDB-GENE-030131-7787]	18	26843683	27027044	1	3	KNOWN	-0.980199286	1.018689294	-0.038490008	1	NA
ENSDARG00000034763	ccnf	ENSDARG00000034763	193.0445166	1.912767652	5.797761403	3.376933224	0.024112032	4.60E-05	0.00065985	X30 - X0_X3 - X0_X7 - X0	cyclin F [Source:ZFIN;Acc:ZDB-GENE-021030-2]	Zv9_NA470	52952	84764	-1	1	KNOWN	1.071309218	-0.908779816	-0.162529402	2	NA
ENSDARG00000034771	rab13	ENSDARG00000034771	331.1095056	1.973540981	6.725501129	3.801240755	0.000294123	1.36E-07	1.96E-06	X30 - X0_X3 - X0_X7 - X0	RAB13, member RAS oncogene family [Source:ZFIN;Acc:ZDB-GENE-030826-30]	16	26035905	26048904	1	2	KNOWN	1.067487597	-0.914995255	-0.152492341	2	NA
ENSDARG00000034773	ncapd3	ENSDARG00000034773	199.6950349	4.493387372	18.61917402	12.19210644	3.11E-06	1.95E-08	5.48E-08	X30 - X0_X3 - X0_X7 - X0	non-SMC condensin II complex, subunit D3 [Source:ZFIN;Acc:ZDB-GENE-040426-737]	1	20323105	20345692	-1	2	KNOWN	0.968684674	-1.028619382	0.059934708	2	Yes
ENSDARG00000034894	wnt5b	ENSDARG00000034894	42.33649067	2.058688597	2.398293351	2.823602594	0.018211526	0.006557241	0.001720464	X30 - X0_X3 - X0_X7 - X0	wingless-type MMTV integration site family, member 5b [Source:ZFIN;Acc:ZDB-GENE-980526-87]	4	7494280	7627025	-1	3	KNOWN	-0.074540604	-0.960643909	1.035184514	4	NA
ENSDARG00000034895	tgfb1b	ENSDARG00000034895	174.301412	2.6056125	10.07229479	7.12571546	0.000918445	8.66E-07	3.24E-06	X30 - X0_X3 - X0_X7 - X0	transforming growth factor, beta 1b [Source:ZFIN;Acc:ZDB-GENE-091028-1]	21	20508236	20517022	1	2	KNOWN	0.922947143	-1.062411529	0.139464386	3	NA
ENSDARG00000034897	rps10	ENSDARG00000034897	6509.411258	1.593109573	3.231150262	2.522044371	0.001111519	1.48E-06	8.34E-06	X30 - X0_X3 - X0_X7 - X0	ribosomal protein S10 [Source:ZFIN;Acc:ZDB-GENE-040426-1481]	6	54129854	54135857	-1	3	KNOWN	0.952411298	-1.041612175	0.089200878	2	NA
ENSDARG00000034956	myclb	ENSDARG00000034956	1085.380056	1.293019557	1.825013366	1.78912317	0.016670774	7.27E-05	9.03E-05	X30 - X0_X3 - X0_X7 - X0	v-myc avian myelocytomatosis viral oncogene lung carcinoma derived homolog b [Source:ZFIN;Acc:ZDB-GENE-030131-5561]	19	32050911	32056559	-1	1	KNOWN	0.636652275	-1.152595525	0.51594325	3	NA
ENSDARG00000035018	thy1	ENSDARG00000035018	268.7968164	3.430226246	6.715425211	16.41847992	0.008060366	0.000282203	1.52E-05	X30 - X0_X3 - X0_X7 - X0	Thy-1 cell surface antigen [Source:ZFIN;Acc:ZDB-GENE-030131-8561]	5	31432548	31441783	1	2	KNOWN	-0.316779653	-0.803243153	1.120022807	5	NA
ENSDARG00000035120	GLDC	ENSDARG00000035120	375.0277702	1.467845324	2.20253218	1.680197774	0.005016532	3.29E-05	0.000686747	X30 - X0_X3 - X0_X7 - X0	glycine dehydrogenase (decarboxylating) [Source:HGNC Symbol;Acc:4313]	5	69158109	69190378	1	1	KNOWN_BY_PROJECTION	1.10823388	-0.834942953	-0.273290927	2	NA
ENSDARG00000035389	fcho2	ENSDARG00000035389	837.0659935	1.254713799	1.455160387	1.456183076	0.013524665	0.000653602	0.000678177	X30 - X0_X3 - X0_X7 - X0	FCH domain only 2 [Source:ZFIN;Acc:ZDB-GENE-050522-228]	5	36741560	36818581	-1	4	KNOWN	0.572937441	-1.154689324	0.581751883	4	NA
ENSDARG00000035423	zgc:123194	ENSDARG00000035423	10500.31635	1.42053538	2.565416771	2.024799574	0.002736498	2.97E-06	2.45E-05	X30 - X0_X3 - X0_X7 - X0	zgc:123194 [Source:ZFIN;Acc:ZDB-GENE-051113-284]	8	54975726	54978405	1	2	KNOWN	0.98096396	-1.018006655	0.037042695	2	NA
ENSDARG00000035459	spns3	ENSDARG00000035459	36.80851778	3.11876674	6.864843018	5.811904904	0.012520794	0.00022118	0.000520567	X30 - X0_X3 - X0_X7 - X0	spinster homolog 3 (Drosophila) [Source:ZFIN;Acc:ZDB-GENE-060531-7]	5	32598776	32617398	-1	2	KNOWN	0.828005503	-1.111000001	0.282994498	3	NA
ENSDARG00000035505	nelfb	ENSDARG00000035505	498.5152967	1.260246725	1.592204801	1.489756873	0.023482667	0.000340468	0.000970606	X30 - X0_X3 - X0_X7 - X0	negative elongation factor complex member B [Source:ZFIN;Acc:ZDB-GENE-040426-765]	5	31187473	31198417	-1	3	KNOWN	0.851858401	-1.101023971	0.24916557	3	NA
ENSDARG00000035521	sfrp1a	ENSDARG00000035521	328.4509021	4.214370058	16.76063875	21.26268886	0.004352013	1.26E-05	7.04E-06	X30 - X0_X3 - X0_X7 - X0	secreted frizzled-related protein 1a [Source:ZFIN;Acc:ZDB-GENE-040310-5]	5	29133524	29183294	1	2	KNOWN	0.303504914	-1.116591084	0.813086169	4	NA
ENSDARG00000035692	rps3a	ENSDARG00000035692	13717.13523	1.489946507	3.088153774	2.393551829	0.00223506	1.44E-06	9.58E-06	X30 - X0_X3 - X0_X7 - X0	ribosomal protein S3A [Source:ZFIN;Acc:ZDB-GENE-030131-9184]	1	23130372	23134510	1	3	KNOWN	0.953694345	-1.040629331	0.086934987	2	NA
ENSDARG00000035694	stm	ENSDARG00000035694	238.5815764	15.47773496	348.3917142	20.86898901	0.000177831	3.94E-08	4.43E-05	X30 - X0_X3 - X0_X7 - X0	starmaker [Source:ZFIN;Acc:ZDB-GENE-031112-4]	19	3700047	3730407	-1	5	KNOWN	1.154585137	-0.591430172	-0.563154964	2	NA
ENSDARG00000035696	fam203a	ENSDARG00000035696	101.6193768	1.298376946	2.668177787	1.685975262	0.042188318	5.91E-06	0.000703339	X30 - X0_X3 - X0_X7 - X0	family with sequence similarity 203, member A [Source:ZFIN;Acc:ZDB-GENE-040718-228]	19	3351694	3358869	1	1	KNOWN	1.110354609	-0.829648581	-0.280706029	2	NA
ENSDARG00000035697	zgc:110697	ENSDARG00000035697	17.50755288	7.081147039	13.1465066	11.60633366	0.002412596	0.000208738	0.000314539	X30 - X0_X3 - X0_X7 - X0	zgc:110697 [Source:ZFIN;Acc:ZDB-GENE-050417-414]	8	690341	699975	1	1	KNOWN	0.804122734	-1.119724221	0.315601486	3	NA
ENSDARG00000035747	bod1	ENSDARG00000035747	363.3627047	1.271680815	1.801786944	1.710455365	0.011460847	2.78E-05	5.50E-05	X30 - X0_X3 - X0_X7 - X0	biorientation of chromosomes in cell division 1 [Source:ZFIN;Acc:ZDB-GENE-060810-163]	21	39871502	39883631	1	1	KNOWN	0.730943556	-1.139610744	0.408667188	3	NA
ENSDARG00000035750	ccnd1	ENSDARG00000035750	1463.477953	3.364200154	11.52276588	9.93599309	7.83E-06	5.51E-08	7.79E-08	X30 - X0_X3 - X0_X7 - X0	cyclin D1 [Source:ZFIN;Acc:ZDB-GENE-980526-176]	7	54575139	54584679	1	5	KNOWN	0.750969554	-1.135112019	0.384142465	3	NA
ENSDARG00000035756	rps17	ENSDARG00000035756	4034.577	1.782624305	3.932354162	3.140609664	0.000373371	7.59E-07	2.75E-06	X30 - X0_X3 - X0_X7 - X0	ribosomal protein S17 [Source:ZFIN;Acc:ZDB-GENE-040426-1852]	7	55225531	55231871	1	1	KNOWN	0.90183111	-1.07543576	0.17360465	3	NA
ENSDARG00000035761	mcm7	ENSDARG00000035761	623.7063925	2.313347656	5.918886458	4.564153141	0.000218987	9.45E-07	2.90E-06	X30 - X0_X3 - X0_X7 - X0	MCM7 minichromosome maintenance deficient 7 (S. cerevisiae) [Source:ZFIN;Acc:ZDB-GENE-020419-27]	14	201291	212779	-1	6	KNOWN	0.907859699	-1.071864373	0.164004673	3	NA
ENSDARG00000035773	CABZ01086220.1	ENSDARG00000035773	1008.048078	-1.224588589	-2.07449761	-1.714591181	0.034201842	9.78E-06	8.95E-05	X30 - X0_X3 - X0_X7 - X0	Uncharacterized protein [Source:UniProtKB/TrEMBL;Acc:E7F0N2]	6	57794691	57836167	-1	1	NOVEL	-0.945292149	1.046943092	-0.101650943	1	NA
ENSDARG00000035809	col1a1b	ENSDARG00000035809	1162.299163	5.215924282	7.625732349	13.27764271	0.000170992	3.45E-05	6.70E-06	X30 - X0_X3 - X0_X7 - X0	collagen, type I, alpha 1b [Source:ZFIN;Acc:ZDB-GENE-030131-4400]	12	3687446	3725230	-1	1	KNOWN	-0.261159526	-0.8435079	1.104667427	5	NA
ENSDARG00000035844	twf1a	ENSDARG00000035844	280.3346256	1.277149886	2.940377268	2.11559534	0.047141736	3.48E-06	5.44E-05	X30 - X0_X3 - X0_X7 - X0	twinfilin, actin-binding protein, homolog 1a [Source:ZFIN;Acc:ZDB-GENE-030131-4402]	25	872206	878030	1	1	KNOWN	0.997250427	-1.002727077	0.00547665	2	NA
ENSDARG00000035858	cnn2	ENSDARG00000035858	1368.130027	2.48806833	12.22285305	7.715357816	0.000304396	1.92E-07	9.00E-07	X30 - X0_X3 - X0_X7 - X0	calponin 2 [Source:ZFIN;Acc:ZDB-GENE-030131-542]	2	23309714	23315897	1	3	KNOWN	0.97446566	-1.023714431	0.049248771	2	NA
ENSDARG00000035860	rps28	ENSDARG00000035860	5112.918183	1.514618861	3.289040503	2.508313652	0.00248611	1.43E-06	9.70E-06	X30 - X0_X3 - X0_X7 - X0	ribosomal protein S28 [Source:ZFIN;Acc:ZDB-GENE-030131-2022]	2	23354448	23356528	-1	3	KNOWN	0.957696461	-1.037519079	0.079822618	2	NA
ENSDARG00000035871	rpl30	ENSDARG00000035871	8627.699547	1.313535567	2.25209395	1.891102585	0.030171799	3.00E-05	0.000185613	X30 - X0_X3 - X0_X7 - X0	ribosomal protein L30 [Source:ZFIN;Acc:ZDB-GENE-030131-8657]	19	34230603	34236244	1	2	KNOWN	0.914997698	-1.067486069	0.152488371	3	NA
ENSDARG00000035879	FUCA1 (1 of 2)	ENSDARG00000035879	214.9080125	2.217745061	9.801553802	6.264010999	0.000974182	2.60E-07	1.58E-06	X30 - X0_X3 - X0_X7 - X0	fucosidase, alpha-L- 1, tissue [Source:HGNC Symbol;Acc:4006]	19	33864036	33869330	-1	1	KNOWN_BY_PROJECTION	0.97690758	-1.021594189	0.044686609	2	NA
ENSDARG00000035887	zgc:91944	ENSDARG00000035887	788.8716883	-1.278623365	-1.26898614	-1.409957769	0.018872625	0.02213232	0.003148897	X30 - X0_X3 - X0_X7 - X0	zgc:91944 [Source:ZFIN;Acc:ZDB-GENE-040718-417]	19	33947267	33976332	-1	3	KNOWN	0.637453023	0.515084158	-1.152537181	7	NA
ENSDARG00000035890	fuca1	ENSDARG00000035890	276.0952228	1.765619969	4.384451679	3.92602951	0.000655353	4.91E-07	9.03E-07	X30 - X0_X3 - X0_X7 - X0	fucosidase, alpha-L- 1, tissue [Source:ZFIN;Acc:ZDB-GENE-030131-7434]	19	33870883	33875837	-1	1	KNOWN	0.733434529	-1.139087217	0.405652688	3	NA
ENSDARG00000035891	acana	ENSDARG00000035891	31.83034431	-2.103647424	-2.79246495	-2.775030724	0.041663634	0.008256308	0.009509316	X30 - X0_X3 - X0_X7 - X0	aggrecan a [Source:ZFIN;Acc:ZDB-GENE-050208-221]	7	50224293	50244367	1	5	KNOWN	-0.59940295	1.154416093	-0.555013142	1	NA
ENSDARG00000035957	gmnn	ENSDARG00000035957	49.04516518	3.40746394	10.21138701	8.970843697	0.003512297	8.89E-06	1.59E-05	X30 - X0_X3 - X0_X7 - X0	geminin, DNA replication inhibitor [Source:ZFIN;Acc:ZDB-GENE-030429-30]	19	32830739	32836176	1	4	KNOWN	0.740003793	-1.137657933	0.39765414	3	NA
ENSDARG00000036015	trnau1apa	ENSDARG00000036015	176.5342942	2.134430798	4.724544945	4.146491998	0.000221575	8.03E-07	1.57E-06	X30 - X0_X3 - X0_X7 - X0	tRNA selenocysteine 1 associated protein 1a [Source:ZFIN;Acc:ZDB-GENE-050522-502]	19	30374779	30384383	-1	2	KNOWN	0.77673461	-1.128308187	0.351573578	3	NA
ENSDARG00000036044	rps20	ENSDARG00000036044	8157.696546	1.71688512	3.851467798	3.035582483	0.000854402	1.27E-06	5.36E-06	X30 - X0_X3 - X0_X7 - X0	ribosomal protein S20 [Source:ZFIN;Acc:ZDB-GENE-040426-2284]	7	59990938	59995522	1	1	KNOWN	0.913076422	-1.06868083	0.155604408	3	NA
ENSDARG00000036070	znrd1	ENSDARG00000036070	99.47076449	1.499326824	3.440365391	2.003293225	0.01156043	3.35E-06	0.000322907	X30 - X0_X3 - X0_X7 - X0	zinc ribbon domain containing 1 [Source:ZFIN;Acc:ZDB-GENE-050320-131]	19	27820192	27825537	-1	6	KNOWN	1.117980218	-0.809170392	-0.308809826	2	NA
ENSDARG00000036106	rgs18	ENSDARG00000036106	210.8746178	2.879197392	8.275907249	6.529377283	4.99E-05	2.09E-07	5.55E-07	X30 - X0_X3 - X0_X7 - X0	regulator of G-protein signaling 18 [Source:ZFIN;Acc:ZDB-GENE-061013-722]	2	6240288	6253261	-1	1	KNOWN	0.86466984	-1.095101509	0.230431669	3	NA
ENSDARG00000036107	txnipa	ENSDARG00000036107	4109.246749	2.060447204	4.510849404	4.066542938	0.005491202	2.96E-05	5.62E-05	X30 - X0_X3 - X0_X7 - X0	thioredoxin interacting protein a [Source:ZFIN;Acc:ZDB-GENE-030804-10]	19	24974068	24977991	1	1	KNOWN	0.739094521	-1.137860001	0.39876548	3	NA
ENSDARG00000036161	hnrnpa0l	ENSDARG00000036161	6266.592344	1.233413811	1.951016281	1.557219998	0.017408766	8.74E-06	0.000174746	X30 - X0_X3 - X0_X7 - X0	heterogeneous nuclear ribonucleoprotein A0, like [Source:ZFIN;Acc:ZDB-GENE-030131-618]	14	40345952	40347380	1	1	KNOWN	1.030877963	-0.965958647	-0.064919317	2	NA
ENSDARG00000036162	hnrnpa0b	ENSDARG00000036162	6954.139273	1.368914118	2.090689537	1.717998957	0.002562324	6.69E-06	6.33E-05	X30 - X0_X3 - X0_X7 - X0	heterogeneous nuclear ribonucleoprotein A0b [Source:ZFIN;Acc:ZDB-GENE-030131-6154]	14	40342126	40344618	1	3	KNOWN	1.010721536	-0.988922018	-0.021799518	2	NA
ENSDARG00000036174	rpl14	ENSDARG00000036174	8885.172125	1.341345326	2.409704095	1.966306604	0.016607859	1.19E-05	8.30E-05	X30 - X0_X3 - X0_X7 - X0	ribosomal protein L14 [Source:ZFIN;Acc:ZDB-GENE-030131-2085]	19	49957402	49964134	1	1	KNOWN	0.938842762	-1.051598933	0.112756171	2	NA
ENSDARG00000036180	ccnb2	ENSDARG00000036180	41.35489321	7.147357829	46.55832354	32.19629101	0.002844795	2.62E-06	8.70E-06	X30 - X0_X3 - X0_X7 - X0	cyclin B2 [Source:ZFIN;Acc:ZDB-GENE-030429-12]	7	31962886	31967624	1	2	KNOWN	0.898664855	-1.077266428	0.178601572	3	NA
ENSDARG00000036194	pitx2	ENSDARG00000036194	220.921394	4.746622692	15.18883905	19.77797187	0.008179486	9.86E-05	6.11E-05	X30 - X0_X3 - X0_X7 - X0	paired-like homeodomain transcription factor 2 [Source:ZFIN;Acc:ZDB-GENE-990714-27]	14	37440876	37450190	1	3	KNOWN	0.253272941	-1.102284775	0.849011833	4	NA
ENSDARG00000036279	lamc1	ENSDARG00000036279	524.4881968	1.675796697	2.607590851	2.862434699	0.026345213	0.000540488	0.000303915	X30 - X0_X3 - X0_X7 - X0	laminin, gamma 1 [Source:ZFIN;Acc:ZDB-GENE-021226-3]	2	35601433	35700011	1	1	KNOWN	0.361229364	-1.130422562	0.769193199	4	NA
ENSDARG00000036282	rnaset2	ENSDARG00000036282	424.2317808	1.341859104	3.205005622	2.539726854	0.008229314	5.43E-07	2.78E-06	X30 - X0_X3 - X0_X7 - X0	ribonuclease T2 [Source:ZFIN;Acc:ZDB-GENE-030131-2513]	13	9518928	9533752	-1	2	KNOWN	0.892640114	-1.08066635	0.188026236	3	NA
ENSDARG00000036298	rps13	ENSDARG00000036298	6106.333853	1.427988137	3.058501778	2.461284929	0.004933647	1.81E-06	9.04E-06	X30 - X0_X3 - X0_X7 - X0	ribosomal protein S13 [Source:ZFIN;Acc:ZDB-GENE-040625-52]	7	28167183	28169871	1	2	KNOWN	0.900181859	-1.076393145	0.176211286	3	NA
ENSDARG00000036305	phf23b	ENSDARG00000036305	1330.215292	-1.308724073	-1.573221142	-1.504141086	0.02651999	0.001416438	0.002835347	X30 - X0_X3 - X0_X7 - X0	PHD finger protein 23b [Source:ZFIN;Acc:ZDB-GENE-030131-5895]	7	27740837	27753033	-1	2	KNOWN	-0.810527886	1.117502253	-0.306974367	1	NA
ENSDARG00000036308	NOD1	ENSDARG00000036308	61.09208403	2.084397035	6.697616973	5.719744479	0.028212057	1.69E-05	3.74E-05	X30 - X0_X3 - X0_X7 - X0	nucleotide-binding oligomerization domain containing 1 [Source:HGNC Symbol;Acc:16390]	16	57289608	57304076	-1	1	KNOWN_BY_PROJECTION	0.766689907	-1.131101558	0.364411651	3	NA
ENSDARG00000036316	rpl39	ENSDARG00000036316	7610.322574	1.377031384	2.668305974	2.12589307	0.005968567	2.67E-06	1.92E-05	X30 - X0_X3 - X0_X7 - X0	ribosomal protein L39 [Source:ZFIN;Acc:ZDB-GENE-040625-51]	14	34306764	34309051	-1	3	KNOWN	0.942699093	-1.048834451	0.106135358	2	NA
ENSDARG00000036345	ftsjd1	ENSDARG00000036345	252.6473062	1.261227541	1.386866648	1.252225416	0.012627049	0.001557175	0.014166213	X30 - X0_X3 - X0_X7 - X0	FtsJ methyltransferase domain containing 1 [Source:ZFIN;Acc:ZDB-GENE-040426-2775]	7	25881931	25886746	-1	1	KNOWN	1.152634202	-0.516519132	-0.63611507	2	NA
ENSDARG00000036359	minal	ENSDARG00000036359	180.1309701	1.264484208	1.809386634	1.276022991	0.031691707	0.000100111	0.028014523	X30 - X0_X3 - X0_X7 - X0	MYC induced nuclear antigen-like [Source:ZFIN;Acc:ZDB-GENE-040426-1283]	10	102538	107648	1	1	KNOWN	1.154502241	-0.595783027	-0.558719214	2	NA
ENSDARG00000036420	CR376787.1	ENSDARG00000036420	18.19436072	7.319251867	11.38491047	14.19094001	0.000919299	0.000131701	4.00E-05	X30 - X0_X3 - X0_X7 - X0	Uncharacterized protein [Source:UniProtKB/TrEMBL;Acc:E7F9C1]	7	21551024	21580127	1	1	KNOWN	0.121526037	-1.05520938	0.933683344	4	NA
ENSDARG00000036456	anxa4	ENSDARG00000036456	921.1276044	2.2920942	9.888173884	8.303314686	0.003152581	1.93E-06	3.67E-06	X30 - X0_X3 - X0_X7 - X0	annexin A4 [Source:ZFIN;Acc:ZDB-GENE-030707-1]	10	42533962	42567602	1	2	KNOWN	0.763699349	-1.131897992	0.368198643	3	NA
ENSDARG00000036570	snrpf	ENSDARG00000036570	423.6489955	1.370141961	3.01307129	2.288839575	0.004482646	6.73E-07	5.44E-06	X30 - X0_X3 - X0_X7 - X0	small nuclear ribonucleoprotein polypeptide F [Source:ZFIN;Acc:ZDB-GENE-040930-9]	Zv9_NA880	20080	23231	1	1	KNOWN	0.958309781	-1.037036395	0.078726614	2	NA
ENSDARG00000036588	mhc1zba	ENSDARG00000036588	3318.826166	2.031612485	2.635011899	3.072870272	0.000150864	1.56E-05	5.56E-06	X30 - X0_X3 - X0_X7 - X0	major histocompatibility complex class I ZBA [Source:ZFIN;Acc:ZDB-GENE-040426-2149]	1	47652531	47659103	-1	1	KNOWN	0.105544193	-1.048585993	0.943041801	4	NA
ENSDARG00000036628	cd74b	ENSDARG00000036628	1991.041816	4.4125858	3.108257431	6.043763984	5.72E-07	3.80E-06	1.56E-07	X30 - X0_X3 - X0_X7 - X0	CD74 molecule, major histocompatibility complex, class II invariant chain b [Source:ZFIN;Acc:ZDB-GENE-990910-10]	21	32377028	32381287	-1	4	KNOWN	-0.960902073	-0.074076154	1.034978227	8	Yes
ENSDARG00000036629	rps14	ENSDARG00000036629	9812.543985	1.524863625	3.068171068	2.528383509	0.002431506	2.46E-06	1.05E-05	X30 - X0_X3 - X0_X7 - X0	ribosomal protein S14 [Source:ZFIN;Acc:ZDB-GENE-030131-8631]	21	32382381	32386664	-1	1	KNOWN	0.886597535	-1.083969204	0.197371669	3	NA
ENSDARG00000036630	plp2	ENSDARG00000036630	304.5180259	1.894881392	3.907267766	3.055211983	0.013244671	7.61E-05	0.000398304	X30 - X0_X3 - X0_X7 - X0	proteolipid protein 2 [Source:ZFIN;Acc:ZDB-GENE-030710-11]	8	51571629	51606232	-1	1	KNOWN	0.945247325	-1.046976011	0.101728686	2	NA
ENSDARG00000036721	tomm40l	ENSDARG00000036721	771.6779396	1.26637089	1.94662508	1.54116805	0.009921744	9.55E-06	0.000219357	X30 - X0_X3 - X0_X7 - X0	translocase of outer mitochondrial membrane 40 homolog, like [Source:ZFIN;Acc:ZDB-GENE-040426-2319]	19	11453208	11463761	1	2	KNOWN	1.057542271	-0.930272392	-0.127269879	2	NA
ENSDARG00000036776	aldh8a1	ENSDARG00000036776	55.57401741	1.829256527	3.255405215	3.240404228	0.011475163	0.000107568	0.000120501	X30 - X0_X3 - X0_X7 - X0	aldehyde dehydrogenase 8 family, member A1 [Source:ZFIN;Acc:ZDB-GENE-040912-3]	23	31991183	32002332	-1	1	KNOWN	0.586483154	-1.154652125	0.568168971	4	NA
ENSDARG00000036787	abcb3l1	ENSDARG00000036787	154.0839673	13.70482723	11.80302435	17.39365667	7.04E-08	1.10E-07	3.66E-08	X30 - X0_X3 - X0_X7 - X0	ATP-binding cassette, sub-family B (MDR/TAP), member 3 like 1 [Source:ZFIN;Acc:ZDB-GENE-030616-245]	19	7746873	7753954	1	1	KNOWN	-0.878614488	-0.209559026	1.088173514	8	Yes
ENSDARG00000036791	dnmt4	ENSDARG00000036791	202.7252881	2.150001907	6.440661525	6.145874829	0.002414031	2.43E-06	3.00E-06	X30 - X0_X3 - X0_X7 - X0	DNA (cytosine-5-)-methyltransferase 4 [Source:ZFIN;Acc:ZDB-GENE-050314-1]	23	17182172	17272078	-1	1	KNOWN	0.637757079	-1.15251481	0.514757731	3	NA
ENSDARG00000036816	pou2f2a	ENSDARG00000036816	86.40323331	1.933490894	2.618151952	3.902375891	0.010910253	0.000828652	6.17E-05	X30 - X0_X3 - X0_X7 - X0	POU domain, class 2, transcription factor 2a [Source:ZFIN;Acc:ZDB-GENE-060310-2]	19	6835974	6925393	-1	3	KNOWN	-0.199945956	-0.884921032	1.084866988	5	NA
ENSDARG00000036875	rps12	ENSDARG00000036875	6814.415732	1.699670864	4.027207194	2.976422428	0.000641721	6.18E-07	3.55E-06	X30 - X0_X3 - X0_X7 - X0	ribosomal protein S12 [Source:ZFIN;Acc:ZDB-GENE-030131-8951]	23	31670535	31674501	1	2	KNOWN	0.96612215	-1.030743459	0.064621308	2	NA
ENSDARG00000036940	ctssa	ENSDARG00000036940	95.47968766	-1.458311119	-1.730604007	-1.467481201	0.023574782	0.003578848	0.021015541	X30 - X0_X3 - X0_X7 - X0	cathepsin Sa [Source:ZFIN;Acc:ZDB-GENE-040426-1583]	19	320356	327394	1	1	KNOWN	-1.154192802	0.606748247	0.547444554	6	NA
ENSDARG00000036942	gpd1c	ENSDARG00000036942	363.8613112	3.915754321	49.81220722	24.31834591	0.001789339	2.43E-07	1.50E-06	X30 - X0_X3 - X0_X7 - X0	glycerol-3-phosphate dehydrogenase 1c [Source:ZFIN;Acc:ZDB-GENE-040426-2576]	19	6894	335446	-1	4	KNOWN	1.034856288	-0.961054505	-0.073801783	2	NA
ENSDARG00000036990	dctd	ENSDARG00000036990	81.79429773	1.947818405	15.57432215	8.683993981	0.011226532	9.76E-08	7.72E-07	X30 - X0_X3 - X0_X7 - X0	dCMP deaminase [Source:ZFIN;Acc:ZDB-GENE-050417-116]	1	40175765	40221985	-1	1	KNOWN	1.003749492	-0.99620785	-0.007541641	2	NA
ENSDARG00000037059	slc44a2	ENSDARG00000037059	1061.197444	1.281981761	1.707658229	1.999647802	0.041900187	0.000549017	9.57E-05	X30 - X0_X3 - X0_X7 - X0	solute carrier family 44, member 2 [Source:ZFIN;Acc:ZDB-GENE-030131-3065]	6	9485157	9531387	1	3	KNOWN	0.123474679	-1.056003653	0.932528974	4	NA
ENSDARG00000037066	LGALS8	ENSDARG00000037066	332.4451503	-1.300267767	-1.888695094	-1.872691262	0.032110407	0.000179766	0.000207095	X30 - X0_X3 - X0_X7 - X0	lectin, galactoside-binding, soluble, 8 [Source:HGNC Symbol;Acc:6569]	20	4835236	4855818	1	1	KNOWN_BY_PROJECTION	-0.6010575	1.154371482	-0.553313982	1	NA
ENSDARG00000037071	rps26	ENSDARG00000037071	3172.626856	1.373853593	2.571841911	2.177604079	0.017932967	1.36E-05	5.97E-05	X30 - X0_X3 - X0_X7 - X0	ribosomal protein S26 [Source:ZFIN;Acc:ZDB-GENE-030131-8606]	23	27916218	27921487	1	2	KNOWN	0.869287775	-1.092864271	0.223576496	3	NA
ENSDARG00000037150	gpc2	ENSDARG00000037150	80.1312987	7.193200509	4.8844603	12.78034544	2.97E-05	0.000192914	2.78E-06	X30 - X0_X3 - X0_X7 - X0	glypican 2 [Source:ZFIN;Acc:ZDB-GENE-050302-31]	14	191878	199640	-1	2	NOVEL	-0.837861075	-0.269176732	1.107037807	5	NA
ENSDARG00000037153	atp6ap1b	ENSDARG00000037153	679.2510071	1.348439276	5.683902632	3.447974953	0.035929102	2.96E-07	3.70E-06	X30 - X0_X3 - X0_X7 - X0	ATPase, H+ transporting, lysosomal accessory protein 1b [Source:ZFIN;Acc:ZDB-GENE-020423-2]	23	26366806	26381517	1	2	KNOWN	1.010319898	-0.989350281	-0.020969617	2	NA
ENSDARG00000037155	wisp2	ENSDARG00000037155	6.151372418	4.115920023	5.837657385	6.973939707	0.030554782	0.007082185	0.004165589	X30 - X0_X3 - X0_X7 - X0	WNT1 inducible signaling pathway protein 2 [Source:ZFIN;Acc:ZDB-GENE-060223-1]	23	26296605	26297715	1	1	KNOWN	0.135619084	-1.06088839	0.925269306	4	NA
ENSDARG00000037158	rcc1	ENSDARG00000037158	386.8897188	1.264729653	2.983495436	1.768453176	0.029691278	1.20E-06	0.000139545	X30 - X0_X3 - X0_X7 - X0	regulator of chromosome condensation 1 [Source:ZFIN;Acc:ZDB-GENE-040426-2216]	16	36602962	36612351	-1	1	KNOWN	1.106795492	-0.83844652	-0.268348972	2	NA
ENSDARG00000037174	zgc:113355	ENSDARG00000037174	34.67665018	2.658582379	6.364870167	4.474898105	0.001871264	7.28E-06	4.79E-05	X30 - X0_X3 - X0_X7 - X0	zgc:113355 [Source:ZFIN;Acc:ZDB-GENE-050410-11]	14	29446724	29452821	-1	1	KNOWN	1.006558194	-0.993310169	-0.013248025	2	NA
ENSDARG00000037178	zic2b	ENSDARG00000037178	599.1860289	4.605024688	33.45876786	16.27299076	1.33E-06	4.50E-09	1.95E-08	X30 - X0_X3 - X0_X7 - X0	zic family member 2 (odd-paired homolog, Drosophila) b [Source:ZFIN;Acc:ZDB-GENE-030219-92]	1	28776999	28806135	1	2	KNOWN	1.057319693	-0.930600513	-0.12671918	2	Yes
ENSDARG00000037188	rpa2	ENSDARG00000037188	476.818367	1.703513506	5.583870645	3.582347117	0.000314132	6.49E-08	4.80E-07	X30 - X0_X3 - X0_X7 - X0	replication protein A2 [Source:ZFIN;Acc:ZDB-GENE-010131-3]	16	5691316	5714695	-1	2	KNOWN	1.010371068	-0.989295778	-0.02107529	2	NA
ENSDARG00000037190	CABZ01062780.1	ENSDARG00000037190	26.32133604	3.103839134	13.57101361	12.01605955	0.043066947	9.98E-05	0.000174261	X30 - X0_X3 - X0_X7 - X0	Uncharacterized protein [Source:UniProtKB/TrEMBL;Acc:E7FA23]	20	6259752	6265755	1	1	NOVEL	0.709506687	-1.143708473	0.434201786	3	NA
ENSDARG00000037261	mtap	ENSDARG00000037261	666.51982	1.19188352	2.198173666	1.578289216	0.031938385	1.75E-06	9.09E-05	X30 - X0_X3 - X0_X7 - X0	methylthioadenosine phosphorylase [Source:ZFIN;Acc:ZDB-GENE-040426-1505]	1	24993612	25010525	1	1	KNOWN	1.06780188	-0.914491742	-0.153310138	2	NA
ENSDARG00000037350	rpl9	ENSDARG00000037350	12456.32916	1.442147595	2.818692708	2.320239087	0.004270122	3.02E-06	1.44E-05	X30 - X0_X3 - X0_X7 - X0	ribosomal protein L9 [Source:ZFIN;Acc:ZDB-GENE-030131-8646]	1	22043597	22048598	-1	6	KNOWN	0.896772897	-1.078345795	0.181572898	3	NA
ENSDARG00000037357	WIPI1 (2 of 2)	ENSDARG00000037357	106.2678273	-1.60657608	-2.652232503	-1.792628235	0.007913812	9.18E-05	0.002272028	X30 - X0_X3 - X0_X7 - X0	WD repeat domain, phosphoinositide interacting 1 [Source:HGNC Symbol;Acc:25471]	12	1235498	1251201	-1	1	KNOWN_BY_PROJECTION	-1.138530051	0.736034306	0.402495745	6	NA
ENSDARG00000037408	TBC1D10C	ENSDARG00000037408	29.96983825	5.76911252	9.575026546	13.15568685	0.00891487	0.001207102	0.000397115	X30 - X0_X3 - X0_X7 - X0	TBC1 domain family, member 10C [Source:HGNC Symbol;Acc:24702]	14	22909158	22926271	1	1	KNOWN_BY_PROJECTION	0.020326862	-1.010008476	0.989681614	4	NA
ENSDARG00000037410	med28	ENSDARG00000037410	366.3304315	1.330867392	2.051023335	1.673218298	0.005272363	8.74E-06	0.000104131	X30 - X0_X3 - X0_X7 - X0	mediator complex subunit 28 [Source:ZFIN;Acc:ZDB-GENE-041121-4]	1	20092032	20095242	1	2	KNOWN	1.016000063	-0.983192523	-0.032807541	2	NA
ENSDARG00000037421	egr1	ENSDARG00000037421	3257.907356	-1.399958098	-1.744474303	-1.723637001	0.005051384	0.000202217	0.00022575	X30 - X0_X3 - X0_X7 - X0	early growth response 1 [Source:ZFIN;Acc:ZDB-GENE-980526-320]	14	22333789	22337652	-1	1	KNOWN	-0.630444371	1.153019847	-0.522575476	1	NA
ENSDARG00000037495	rtn4rl2b	ENSDARG00000037495	15.57910827	-1.729177673	-3.60056385	-2.395983436	0.010689996	0.000131643	0.001067865	X30 - X0_X3 - X0_X7 - X0	reticulon 4 receptor-like 2b [Source:ZFIN;Acc:ZDB-GENE-040310-2]	14	15029493	15032186	1	1	KNOWN	-1.081011717	0.892017239	0.188994478	6	NA
ENSDARG00000037554	arhgef3l	ENSDARG00000037554	127.7585895	1.969597608	3.434992861	3.418956806	0.0014691	1.53E-05	1.60E-05	X30 - X0_X3 - X0_X7 - X0	Rho guanine nucleotide exchange factor (GEF) 3, like [Source:ZFIN;Acc:ZDB-GENE-050522-85]	23	20957699	20972636	1	3	KNOWN	0.58685282	-1.154648115	0.567795296	4	NA
ENSDARG00000037640	aurkb	ENSDARG00000037640	143.702719	13.35186138	84.69778865	47.33566762	6.22E-06	2.81E-08	9.62E-08	X30 - X0_X3 - X0_X7 - X0	aurora kinase B [Source:ZFIN;Acc:ZDB-GENE-020419-40]	14	2647	7578	1	1	KNOWN	1.015404356	-0.983848684	-0.031555672	2	NA
ENSDARG00000037655	pls3	ENSDARG00000037655	1225.521777	1.537253851	4.382943184	3.971413336	0.026593546	8.03E-06	1.45E-05	X30 - X0_X3 - X0_X7 - X0	plastin 3 (T isoform) [Source:ZFIN;Acc:ZDB-GENE-040718-10]	14	13711343	13783237	1	2	KNOWN	0.705948251	-1.144319689	0.438371438	3	NA
ENSDARG00000037675	npm1b	ENSDARG00000037675	489.8565957	1.21059231	1.54530824	1.504654424	0.04656234	0.000437184	0.00067803	X30 - X0_X3 - X0_X7 - X0	nucleophosmin/nucleoplasmin, 1b [Source:ZFIN;Acc:ZDB-GENE-080723-7]	14	5594201	5648591	-1	1	KNOWN	0.685054268	-1.147527437	0.462473169	3	NA
ENSDARG00000037746	actb1	ENSDARG00000037746	37546.08451	1.587574029	5.265769853	3.259444828	0.002847037	4.14E-07	4.78E-06	X30 - X0_X3 - X0_X7 - X0	actin, beta 1 [Source:ZFIN;Acc:ZDB-GENE-000329-1]	1	7725183	7728816	-1	6	KNOWN	1.028892777	-0.968356886	-0.060535892	2	NA
ENSDARG00000037748	slc43a1b	ENSDARG00000037748	5.543193401	3.58852618	7.774892817	10.17080482	0.006144004	0.000201073	6.37E-05	X30 - X0_X3 - X0_X7 - X0	solute carrier family 43, member 1b [Source:ZFIN;Acc:ZDB-GENE-070209-173]	1	45046970	45093536	-1	1	KNOWN	0.179145205	-1.077464422	0.898319217	4	NA
ENSDARG00000037758	tlr2	ENSDARG00000037758	13.7020755	2.787915167	4.065082193	4.989092701	0.020331699	0.001882489	0.000628788	X30 - X0_X3 - X0_X7 - X0	toll-like receptor 2 [Source:ZFIN;Acc:ZDB-GENE-040219-6]	1	8060152	8064588	1	2	KNOWN	0.106503935	-1.048989224	0.942485289	4	NA
ENSDARG00000037794	nptx2a	ENSDARG00000037794	109.5171181	-1.486843661	-2.297828795	-2.455285409	0.007227885	6.35E-05	3.67E-05	X30 - X0_X3 - X0_X7 - X0	neuronal pentraxin 2a [Source:ZFIN;Acc:ZDB-GENE-060707-1]	3	62275125	62302024	1	1	KNOWN	-0.419191017	1.141372933	-0.722181916	1	NA
ENSDARG00000037805	lgals3bpa	ENSDARG00000037805	131.935054	3.627599789	8.386723252	6.688806346	0.002070903	3.21E-05	0.000107568	X30 - X0_X3 - X0_X7 - X0	lectin, galactoside-binding, soluble, 3 binding protein a [Source:ZFIN;Acc:ZDB-GENE-060331-57]	3	58513145	58525599	-1	1	KNOWN	0.892391605	-1.080804278	0.188412674	3	NA
ENSDARG00000037845	col9a3	ENSDARG00000037845	417.0193312	2.753908884	4.958790413	6.002693404	0.013953289	0.000537023	0.000281148	X30 - X0_X3 - X0_X7 - X0	collagen, type IX, alpha 3 [Source:ZFIN;Acc:ZDB-GENE-030131-9799]	23	511730	540996	-1	1	KNOWN	0.233324201	-1.096034278	0.862710077	4	NA
ENSDARG00000037859	il11a	ENSDARG00000037859	31.45683167	7.67077757	34.85394319	15.0776421	0.001350968	2.44E-06	6.49E-05	X30 - X0_X3 - X0_X7 - X0	interleukin 11a [Source:ZFIN;Acc:ZDB-GENE-051019-1]	16	14359727	14366281	1	1	NOVEL	1.113881102	-0.820477395	-0.293403707	2	NA
ENSDARG00000037870	actb2	ENSDARG00000037870	85064.69213	1.355765564	2.849586649	2.209193474	0.011724815	3.04E-06	2.39E-05	X30 - X0_X3 - X0_X7 - X0	actin, beta 2 [Source:ZFIN;Acc:ZDB-GENE-000329-3]	3	40520889	40524586	-1	7	KNOWN	0.949250955	-1.044004059	0.094753104	2	NA
ENSDARG00000037883	prcp	ENSDARG00000037883	270.8577877	1.688384688	3.688332959	3.117401067	0.001440305	1.54E-06	4.41E-06	X30 - X0_X3 - X0_X7 - X0	prolylcarboxypeptidase (angiotensinase C) [Source:ZFIN;Acc:ZDB-GENE-040718-447]	15	10338952	10424397	-1	1	KNOWN	0.831840367	-1.109484314	0.277643947	3	NA
ENSDARG00000037892	psmc3ip	ENSDARG00000037892	32.16256985	3.697547035	18.67914148	11.30470796	0.007292941	2.88E-06	2.35E-05	X30 - X0_X3 - X0_X7 - X0	PSMC3 interacting protein [Source:ZFIN;Acc:ZDB-GENE-040625-125]	3	37107475	37130351	1	3	KNOWN	0.994781918	-1.005137649	0.010355731	2	NA
ENSDARG00000037894	ezh1	ENSDARG00000037894	1961.455627	-1.298775726	-1.494539215	-1.413855633	0.035276016	0.003619925	0.008469377	X30 - X0_X3 - X0_X7 - X0	enhancer of zeste homolog 1 (Drosophila) [Source:ZFIN;Acc:ZDB-GENE-050114-1]	3	36854483	36887433	1	4	KNOWN	-0.936625306	1.053162871	-0.116537565	1	NA
ENSDARG00000037917	itga3a	ENSDARG00000037917	57.73570643	1.96368951	6.430981757	4.3884377	0.006911474	2.09E-06	1.55E-05	X30 - X0_X3 - X0_X7 - X0	integrin, alpha 3a [Source:ZFIN;Acc:ZDB-GENE-090805-3]	3	34931497	35002337	1	1	KNOWN	0.97029828	-1.027266227	0.056967947	2	NA
ENSDARG00000037924	gna13b	ENSDARG00000037924	308.8164586	1.395989642	2.643053592	2.429586435	0.028549372	2.81E-05	5.54E-05	X30 - X0_X3 - X0_X7 - X0	guanine nucleotide binding protein (G protein), alpha 13b [Source:ZFIN;Acc:ZDB-GENE-030131-8277]	3	36331697	36364021	-1	1	KNOWN	0.729938197	-1.139819195	0.409880998	3	NA
ENSDARG00000037933	kcnc3b	ENSDARG00000037933	52.10245821	-1.365664625	-2.537752537	-1.770856953	0.045254732	0.000105316	0.002178681	X30 - X0_X3 - X0_X7 - X0	potassium voltage-gated channel, Shaw-related subfamily, member 3b [Source:ZFIN;Acc:ZDB-GENE-100901-2]	24	38593472	38682990	1	1	KNOWN	-1.085767072	0.883225128	0.202541943	6	NA
ENSDARG00000037961	rcn3	ENSDARG00000037961	130.3906916	2.887761983	11.37043277	7.265210118	0.001778067	1.94E-06	1.12E-05	X30 - X0_X3 - X0_X7 - X0	reticulocalbin 3, EF-hand calcium binding domain [Source:ZFIN;Acc:ZDB-GENE-040625-175]	3	32672962	32678048	-1	2	KNOWN	0.989132913	-1.010523878	0.021390965	2	NA
ENSDARG00000037963	nek6	ENSDARG00000037963	228.1945846	1.622163681	6.771155578	4.35735966	0.032673594	2.54E-06	2.14E-05	X30 - X0_X3 - X0_X7 - X0	NIMA (never in mitosis gene a)-related kinase 6 [Source:ZFIN;Acc:ZDB-GENE-040724-133]	21	7855763	7897154	-1	2	KNOWN	0.978558088	-1.020144423	0.041586335	2	NA
ENSDARG00000037966	thoc6	ENSDARG00000037966	209.2338987	1.507804839	3.167386409	2.287697932	0.000812161	3.98E-07	4.72E-06	X30 - X0_X3 - X0_X7 - X0	THO complex 6 homolog (Drosophila) [Source:ZFIN;Acc:ZDB-GENE-041010-198]	3	32788673	32795412	1	3	KNOWN	1.019430101	-0.979365667	-0.040064434	2	NA
ENSDARG00000037978	CLEC19A	ENSDARG00000037978	193.5619365	2.087942324	3.468671108	3.352994707	0.040093631	0.000951187	0.001265777	X30 - X0_X3 - X0_X7 - X0	C-type lectin domain family 19, member A [Source:HGNC Symbol;Acc:34522]	3	31329118	31340458	1	1	KNOWN_BY_PROJECTION	0.651212843	-1.151403839	0.500190996	3	NA
ENSDARG00000037997	tubb5	ENSDARG00000037997	11716.72029	6.932841759	24.17075786	26.96837801	2.24E-06	7.06E-08	6.30E-08	X30 - X0_X3 - X0_X7 - X0	tubulin, beta 5 [Source:ZFIN;Acc:ZDB-GENE-031110-4]	16	11935861	11944510	1	1	KNOWN	0.443615398	-1.145064995	0.701449597	4	Yes
ENSDARG00000038010	rac2	ENSDARG00000038010	581.3435878	4.798457752	40.90421889	18.28566832	4.48E-05	5.22E-08	2.85E-07	X30 - X0_X3 - X0_X7 - X0	ras-related C3 botulinum toxin substrate 2 (rho family, small GTP binding protein Rac2) [Source:ZFIN;Acc:ZDB-GENE-040625-27]	3	29661962	29694388	1	2	KNOWN	1.072924529	-0.906090072	-0.166834457	2	NA
ENSDARG00000038066	kpna2	ENSDARG00000038066	808.5640409	12.09928058	104.4279765	43.06697728	1.08E-07	2.09E-09	7.06E-09	X30 - X0_X3 - X0_X7 - X0	karyopherin alpha 2 (RAG cohort 1, importin alpha 1) [Source:ZFIN;Acc:ZDB-GENE-040718-22]	3	25471234	25478284	-1	3	KNOWN	1.090213428	-0.874615456	-0.215597972	2	Yes
ENSDARG00000038112	si:dkeyp-59c12.1	ENSDARG00000038112	14.9134638	1.816455705	2.235493637	2.425950407	0.004742376	0.000519064	0.000243321	X30 - X0_X3 - X0_X7 - X0	si:dkeyp-59c12.1 [Source:ZFIN;Acc:ZDB-GENE-050419-167]	18	25009219	25010399	1	1	KNOWN	0.244359974	-1.099531588	0.855171614	4	NA
ENSDARG00000038133	zgc:113411	ENSDARG00000038133	85.16164474	2.752089309	9.535286103	7.444543036	0.019929213	2.83E-05	8.18E-05	X30 - X0_X3 - X0_X7 - X0	zgc:113411 [Source:ZFIN;Acc:ZDB-GENE-050417-474]	3	24932187	24941134	1	4	KNOWN	0.851520893	-1.101174487	0.249653595	3	NA
ENSDARG00000038156	dusp11	ENSDARG00000038156	268.9977311	1.343772196	2.58367559	1.809013385	0.003586247	9.09E-07	2.94E-05	X30 - X0_X3 - X0_X7 - X0	dual specificity phosphatase 11 (RNA/RNP complex 1-interacting) [Source:ZFIN;Acc:ZDB-GENE-050417-226]	10	43499381	43512443	-1	3	KNOWN	1.072113427	-0.907445458	-0.164667969	2	NA
ENSDARG00000038226	CABZ01074994.1	ENSDARG00000038226	7.87304588	9.392842348	8.403653383	13.69568779	0.009835866	0.016480202	0.003764724	X30 - X0_X3 - X0_X7 - X0	Uncharacterized protein [Source:UniProtKB/TrEMBL;Acc:E7F9N5]	12	49198448	49212435	1	1	NOVEL	-0.744146075	-0.392573917	1.136719992	5	NA
ENSDARG00000038270	PIGG	ENSDARG00000038270	232.9765006	-1.247481139	-1.477970913	-1.414580005	0.034340645	0.001531037	0.003041258	X30 - X0_X3 - X0_X7 - X0	phosphatidylinositol glycan anchor biosynthesis, class G [Source:HGNC Symbol;Acc:25985]	14	3895192	4120141	-1	1	KNOWN_BY_PROJECTION	-0.822711314	1.11303904	-0.290327727	1	NA
ENSDARG00000038278	PTGIR	ENSDARG00000038278	12.35211197	3.024718898	8.780177978	6.228853827	0.009152041	1.97E-05	0.00012108	X30 - X0_X3 - X0_X7 - X0	prostaglandin I2 (prostacyclin) receptor (IP) [Source:HGNC Symbol;Acc:9602]	15	9256547	9319373	1	1	KNOWN_BY_PROJECTION	0.960135281	-1.03559008	0.075454799	2	NA
ENSDARG00000038386	ascl1a	ENSDARG00000038386	306.2733943	4.710552199	48.383491	13.28535328	3.04E-05	1.95E-08	3.67E-07	X30 - X0_X3 - X0_X7 - X0	achaete-scute complex-like 1a (Drosophila) [Source:ZFIN;Acc:ZDB-GENE-980526-90]	4	16485295	16487377	1	1	KNOWN	1.134707426	-0.752635371	-0.382072055	2	NA
ENSDARG00000038424	si:dkey-8k3.2	ENSDARG00000038424	204.9492293	26.9500112	47.08183012	27.06103629	0.000492532	6.67E-05	0.00025242	X30 - X0_X3 - X0_X7 - X0	si:dkey-8k3.2 [Source:ZFIN;Acc:ZDB-GENE-100922-98]	16	18720425	18754319	-1	4	KNOWN	1.154687296	-0.582132848	-0.572554448	2	NA
ENSDARG00000038446	nrp2b	ENSDARG00000038446	1293.712681	2.931913406	6.137296446	5.348855094	2.78E-06	7.36E-08	1.20E-07	X30 - X0_X3 - X0_X7 - X0	neuropilin 2b [Source:ZFIN;Acc:ZDB-GENE-040611-3]	9	14643802	14781066	-1	1	KNOWN	0.797067482	-1.122075427	0.325007946	3	Yes
ENSDARG00000038458	WIPF1 (1 of 2)	ENSDARG00000038458	46.74392703	3.329697158	4.277534946	5.001367066	0.000177893	3.33E-05	1.52E-05	X30 - X0_X3 - X0_X7 - X0	WAS/WASL interacting protein family, member 1 [Source:HGNC Symbol;Acc:12736]	9	2518413	2537534	-1	2	KNOWN_BY_PROJECTION	0.089067934	-1.041554617	0.952486684	4	NA
ENSDARG00000038541	ccr12.3	ENSDARG00000038541	193.6083673	2.06370158	15.06469514	9.682012867	0.04077183	2.03E-06	9.67E-06	X30 - X0_X3 - X0_X7 - X0	chemokine (C-C motif) receptor 12.3 [Source:ZFIN;Acc:ZDB-GENE-060503-97]	2	50554397	50555589	-1	2	KNOWN	0.938068833	-1.052146883	0.11407805	2	NA
ENSDARG00000038668	gbp1	ENSDARG00000038668	421.2676793	3.263123804	8.243065249	6.10385548	1.30E-05	1.74E-07	5.19E-07	X30 - X0_X3 - X0_X7 - X0	guanylate binding protein 1 [Source:ZFIN;Acc:ZDB-GENE-040718-32]	2	42122033	42136425	-1	4	KNOWN	0.949906982	-1.043510915	0.093603934	2	NA
ENSDARG00000038669	gbp2	ENSDARG00000038669	208.5094971	11.76513738	22.84692759	25.63871547	1.21E-06	1.48E-07	1.10E-07	X30 - X0_X3 - X0_X7 - X0	guanylate binding protein 2 [Source:ZFIN;Acc:ZDB-GENE-070912-618]	2	42106335	42118400	1	2	KNOWN	0.376579312	-1.133615534	0.757036223	4	Yes
ENSDARG00000038687	nfkb2	ENSDARG00000038687	744.5065502	1.278322837	2.350254392	2.158308363	0.025444354	7.40E-06	1.68E-05	X30 - X0_X3 - X0_X7 - X0	nuclear factor of kappa light polypeptide gene enhancer in B-cells 2, p49/p100 [Source:ZFIN;Acc:ZDB-GENE-030131-6701]	13	22857578	22875759	1	5	KNOWN	0.737060419	-1.138307095	0.401246676	3	NA
ENSDARG00000038784	faim2a	ENSDARG00000038784	496.4165874	-1.18492201	-1.803661355	-1.546849702	0.045766703	2.22E-05	0.000192218	X30 - X0_X3 - X0_X7 - X0	Fas apoptotic inhibitory molecule 2a [Source:ZFIN;Acc:ZDB-GENE-050320-88]	2	32212087	32223025	-1	2	KNOWN	-0.938865451	1.051582834	-0.112717383	1	NA
ENSDARG00000038788	DNAI1 (2 of 2)	ENSDARG00000038788	25.27821553	7.888337044	61.05393246	17.57932442	0.000912744	2.16E-07	2.37E-05	X30 - X0_X3 - X0_X7 - X0	dynein, axonemal, intermediate chain 1 [Source:HGNC Symbol;Acc:2954]	21	16467609	16494430	1	2	KNOWN_BY_PROJECTION	1.137667658	-0.73996017	-0.397707489	2	NA
ENSDARG00000038794	zgc:113531	ENSDARG00000038794	40.4415007	2.254423916	4.229096232	5.482901596	0.027212256	0.000477444	0.000129126	X30 - X0_X3 - X0_X7 - X0	zgc:113531 [Source:ZFIN;Acc:ZDB-GENE-050320-52]	2	33175185	33184246	1	1	KNOWN	0.147634226	-1.065609985	0.917975759	4	NA
ENSDARG00000038802	cenpl	ENSDARG00000038802	36.33067769	4.000226104	19.82912401	10.81458611	0.00051623	2.81E-07	2.85E-06	X30 - X0_X3 - X0_X7 - X0	centromere protein L [Source:ZFIN;Acc:ZDB-GENE-040930-6]	2	33846613	33856275	-1	2	KNOWN	1.042979455	-0.95061138	-0.092368075	2	NA
ENSDARG00000038822	mrc1b	ENSDARG00000038822	2290.405959	2.145168983	9.979033405	5.634908142	0.003835461	1.53E-06	1.29E-05	X30 - X0_X3 - X0_X7 - X0	mannose receptor, C type 1b [Source:ZFIN;Acc:ZDB-GENE-070705-13]	2	31231575	31256560	-1	3	KNOWN	1.034305946	-0.96174088	-0.072565066	2	NA
ENSDARG00000038826	jph1b	ENSDARG00000038826	512.7090829	-1.266159699	-1.559339718	-1.557423432	0.045989855	0.001484021	0.001426533	X30 - X0_X3 - X0_X7 - X0	junctophilin 1b [Source:ZFIN;Acc:ZDB-GENE-060616-389]	2	30005551	30039129	-1	2	KNOWN	-0.583019951	1.154681918	-0.571661967	1	NA
ENSDARG00000038845	ldhd	ENSDARG00000038845	589.7410074	-1.342797205	-1.905743824	-1.856647481	0.032109022	0.000363852	0.000437184	X30 - X0_X3 - X0_X7 - X0	lactate dehydrogenase D [Source:ZFIN;Acc:ZDB-GENE-030131-6140]	25	13905963	13922769	-1	1	KNOWN	-0.654285679	1.151116557	-0.496830879	1	NA
ENSDARG00000038847	gins3	ENSDARG00000038847	43.52638377	3.468915808	12.7587968	10.92869415	0.000463322	4.80E-07	9.03E-07	X30 - X0_X3 - X0_X7 - X0	GINS complex subunit 3 [Source:ZFIN;Acc:ZDB-GENE-040721-1]	25	13831993	13835680	-1	1	KNOWN	0.753228116	-1.134562311	0.381334195	3	NA
ENSDARG00000038858	setd7	ENSDARG00000038858	2024.333039	-1.27252876	-1.847861564	-1.574467499	0.017551702	4.86E-05	0.00038606	X30 - X0_X3 - X0_X7 - X0	SET domain containing (lysine methyltransferase) 7 [Source:ZFIN;Acc:ZDB-GENE-040718-156]	14	49134990	49148620	-1	2	KNOWN	-0.983058707	1.016121275	-0.033062569	1	NA
ENSDARG00000038882	smc4	ENSDARG00000038882	351.5329231	5.900718813	25.17327147	17.0831361	6.45E-07	9.99E-09	2.21E-08	X30 - X0_X3 - X0_X7 - X0	structural maintenance of chromosomes 4 [Source:ZFIN;Acc:ZDB-GENE-020419-21]	15	1529850	1568335	1	3	KNOWN	0.942481383	-1.04899205	0.106510666	2	Yes
ENSDARG00000038954	ctnnbip1	ENSDARG00000038954	1353.445416	1.430003356	2.159722229	2.232140846	0.001100427	4.63E-06	3.44E-06	X30 - X0_X3 - X0_X7 - X0	catenin, beta interacting protein 1 [Source:ZFIN;Acc:ZDB-GENE-000906-3]	23	29954461	29994591	-1	2	KNOWN	0.493814748	-1.15084888	0.657034132	4	NA
ENSDARG00000038979	VOPP1 (2 of 2)	ENSDARG00000038979	55.72724413	1.560099716	2.007575541	2.575980802	0.031483253	0.002090244	0.000229502	X30 - X0_X3 - X0_X7 - X0	vesicular, overexpressed in cancer, prosurvival protein 1 [Source:HGNC Symbol;Acc:34518]	2	24026726	24040524	-1	2	KNOWN_BY_PROJECTION	-0.079172549	-0.958060346	1.037232896	4	NA
ENSDARG00000039020	fbxo5	ENSDARG00000039020	52.53870292	7.68147645	33.55772603	23.58332744	0.001560086	5.85E-06	1.86E-05	X30 - X0_X3 - X0_X7 - X0	F-box protein 5 [Source:ZFIN;Acc:ZDB-GENE-030131-4027]	13	47400088	47413346	1	3	KNOWN	0.915670355	-1.067064897	0.151394542	3	NA
ENSDARG00000039034	marcksl1a	ENSDARG00000039034	3064.179953	1.574495015	2.815348747	2.573725872	0.001406787	4.24E-06	8.39E-06	X30 - X0_X3 - X0_X7 - X0	MARCKS-like 1a [Source:ZFIN;Acc:ZDB-GENE-040426-2146]	13	46745086	46748279	1	2	KNOWN	0.751178033	-1.135061644	0.383883611	3	NA
ENSDARG00000039062	morn4	ENSDARG00000039062	409.5406219	1.407953899	2.242792321	2.142543318	0.046646928	0.000354107	0.000640379	X30 - X0_X3 - X0_X7 - X0	MORN repeat containing 4 [Source:ZFIN;Acc:ZDB-GENE-050417-7]	13	41358337	41366557	-1	2	KNOWN	0.683814618	-1.147697714	0.463883096	3	NA
ENSDARG00000039069	slx4ip	ENSDARG00000039069	32.68695786	2.62684309	11.50427493	7.883598194	0.030693042	1.61E-05	9.15E-05	X30 - X0_X3 - X0_X7 - X0	SLX4 interacting protein [Source:ZFIN;Acc:ZDB-GENE-040426-1365]	13	35613201	35694123	-1	3	KNOWN	0.933299474	-1.055474047	0.122174573	2	NA
ENSDARG00000039082	zgc:123010	ENSDARG00000039082	390.2602726	2.05287371	7.773750114	5.658143204	0.001410624	5.77E-07	2.20E-06	X30 - X0_X3 - X0_X7 - X0	zgc:123010 [Source:ZFIN;Acc:ZDB-GENE-051120-15]	13	40595043	40630470	-1	3	KNOWN	0.903055127	-1.074719812	0.171664684	3	NA
ENSDARG00000039098	ca8	ENSDARG00000039098	59.04296052	1.625401696	4.178350476	3.996035049	0.040518649	2.21E-05	2.93E-05	X30 - X0_X3 - X0_X7 - X0	carbonic anhydrase VIII [Source:ZFIN;Acc:ZDB-GENE-050417-26]	2	21651559	21675050	1	2	KNOWN	0.640171112	-1.152332941	0.512161829	3	NA
ENSDARG00000039142	arpc5a	ENSDARG00000039142	1160.401551	2.007910816	9.287612747	5.121639558	0.000891292	1.99E-07	2.03E-06	X30 - X0_X3 - X0_X7 - X0	actin related protein 2/3 complex, subunit 5A [Source:ZFIN;Acc:ZDB-GENE-030131-8448]	2	20763673	20771677	1	1	KNOWN	1.044550631	-0.948521118	-0.096029512	2	NA
ENSDARG00000039182	cacna2d2	ENSDARG00000039182	64.49189767	-1.508098903	-2.281703356	-2.041023555	0.039244153	0.000963535	0.002256838	X30 - X0_X3 - X0_X7 - X0	calcium channel, voltage-dependent, alpha 2/delta subunit 2 [Source:ZFIN;Acc:ZDB-GENE-050320-71]	6	53453187	53841950	-1	2	KNOWN	-0.854000068	1.100062374	-0.246062306	1	NA
ENSDARG00000039203	MFF (1 of 2)	ENSDARG00000039203	699.9776785	-1.216778108	-1.614317677	-1.660583136	0.024769649	9.89E-05	6.96E-05	X30 - X0_X3 - X0_X7 - X0	mitochondrial fission factor [Source:HGNC Symbol;Acc:24858]	2	11442481	11454228	-1	3	KNOWN_BY_PROJECTION	-0.479932979	1.149498376	-0.669565397	1	NA
ENSDARG00000039208	nasp	ENSDARG00000039208	661.1075521	1.485755411	4.692753413	2.907651927	0.001130126	7.06E-08	9.11E-07	X30 - X0_X3 - X0_X7 - X0	nuclear autoantigenic sperm protein (histone-binding) [Source:ZFIN;Acc:ZDB-GENE-030131-5511]	6	33608799	33614433	-1	11	KNOWN	1.035539939	-0.960198241	-0.075341698	2	NA
ENSDARG00000039217	orc1	ENSDARG00000039217	76.48479762	1.942913842	9.936015256	5.0017962	0.001273085	4.88E-08	8.06E-07	X30 - X0_X3 - X0_X7 - X0	origin recognition complex, subunit 1 [Source:ZFIN;Acc:ZDB-GENE-030131-6960]	6	33629385	33645524	1	5	KNOWN	1.068448674	-0.913451278	-0.154997396	2	NA
ENSDARG00000039220	st6galnac5a	ENSDARG00000039220	84.6697169	-1.320841523	-2.187739692	-1.675973029	0.042221118	0.00011373	0.001665917	X30 - X0_X3 - X0_X7 - X0	ST6 (alpha-N-acetyl-neuraminyl-2,3-beta-galactosyl-1,3)-N-acetylgalactosaminide alpha-2,6-sialyltransferase 5a [Source:ZFIN;Acc:ZDB-GENE-070705-488]	2	8945288	9044160	-1	2	KNOWN	-1.054505998	0.934699713	0.119806286	6	NA
ENSDARG00000039229	cep78	ENSDARG00000039229	33.17167981	1.970658153	3.57028502	3.845465321	0.023256322	0.000262284	0.000161649	X30 - X0_X3 - X0_X7 - X0	centrosomal protein 78 [Source:ZFIN;Acc:ZDB-GENE-070905-1]	8	54214245	54232674	-1	2	KNOWN	0.436085154	-1.143986584	0.70790143	4	NA
ENSDARG00000039234	zgc:171579	ENSDARG00000039234	10.11819631	3.514168614	25.75287391	10.49914835	0.034967494	3.21E-05	0.001021017	X30 - X0_X3 - X0_X7 - X0	zgc:171579 [Source:ZFIN;Acc:ZDB-GENE-080204-32]	13	38610992	38620012	1	1	KNOWN	1.098904131	-0.856546974	-0.242357157	2	NA
ENSDARG00000039241	prkca	ENSDARG00000039241	1000.569078	-1.343588323	-1.986363041	-2.024587624	0.011536076	5.21E-05	4.18E-05	X30 - X0_X3 - X0_X7 - X0	protein kinase C, alpha [Source:ZFIN;Acc:ZDB-GENE-050208-100]	6	22912210	23074768	1	1	KNOWN	-0.526678208	1.153259072	-0.626580864	1	NA
ENSDARG00000039243	zgc:152791	ENSDARG00000039243	187.5830845	8.130777684	4.37603649	9.493668148	0.001696679	0.032922829	0.000820559	X30 - X0_X3 - X0_X7 - X0	zgc:152791 [Source:ZFIN;Acc:ZDB-GENE-060901-4]	13	38014818	38017588	-1	2	KNOWN	-1.11587999	0.300823513	0.815056477	8	NA
ENSDARG00000039265	arhgap4a	ENSDARG00000039265	97.84375168	2.464239292	5.10087169	4.880708138	0.001245252	1.24E-05	1.68E-05	X30 - X0_X3 - X0_X7 - X0	Rho GTPase activating protein 4a [Source:ZFIN;Acc:ZDB-GENE-040426-1229]	23	25276726	25302732	1	2	KNOWN	0.650964699	-1.151426488	0.50046179	3	NA
ENSDARG00000039272	pls1	ENSDARG00000039272	364.4186865	-1.43631859	-2.027979169	-1.453650903	0.008942679	0.000124612	0.006730891	X30 - X0_X3 - X0_X7 - X0	plastin 1 (I isoform) [Source:ZFIN;Acc:ZDB-GENE-030131-6205]	2	7845116	7895670	-1	3	KNOWN	-1.154318005	0.602897243	0.551420762	6	NA
ENSDARG00000039347	rps24	ENSDARG00000039347	8579.936916	1.447825168	2.917176543	2.337260721	0.005405402	3.27E-06	1.85E-05	X30 - X0_X3 - X0_X7 - X0	ribosomal protein S24 [Source:ZFIN;Acc:ZDB-GENE-040109-5]	13	30448864	30458822	1	6	KNOWN	0.922982176	-1.062388689	0.139406513	3	NA
ENSDARG00000039351	si:dkey-200l5.2	ENSDARG00000039351	6.228644741	6.233469578	8.018067847	6.314103358	0.001061662	0.000249708	0.000918445	X30 - X0_X3 - X0_X7 - X0	si:dkey-200l5.2 [Source:ZFIN;Acc:ZDB-GENE-091204-19]	10	17807201	17810322	1	2	KNOWN	1.153776309	-0.616890306	-0.536886002	2	NA
ENSDARG00000039354	ska1	ENSDARG00000039354	43.69840957	22.61408107	93.3943788	57.91514057	1.11E-05	1.11E-07	4.36E-07	X30 - X0_X3 - X0_X7 - X0	spindle and kinetochore associated complex subunit 1 [Source:ZFIN;Acc:ZDB-GENE-040718-334]	10	17573496	17581151	-1	2	KNOWN	1.000838059	-0.999159828	-0.001678231	2	NA
ENSDARG00000039374	APOOL	ENSDARG00000039374	745.2840919	-1.243658545	-1.211485957	-1.527469941	0.019269277	0.033875241	0.000336712	X30 - X0_X3 - X0_X7 - X0	apolipoprotein O-like [Source:HGNC Symbol;Acc:24009]	5	24635185	24651978	-1	1	KNOWN_BY_PROJECTION	0.667382144	0.482367017	-1.149749161	7	NA
ENSDARG00000039411	cep68	ENSDARG00000039411	141.5355836	1.241066962	1.316790882	1.349561562	0.027392897	0.007733114	0.004761229	X30 - X0_X3 - X0_X7 - X0	centrosomal protein 68 [Source:ZFIN;Acc:ZDB-GENE-030616-565]	13	24639272	24652985	-1	3	KNOWN	0.257298866	-1.103507356	0.84620849	4	NA
ENSDARG00000039424	snrpb2	ENSDARG00000039424	408.3261253	1.253415706	2.235108583	1.692594468	0.008798765	1.37E-06	3.09E-05	X30 - X0_X3 - X0_X7 - X0	small nuclear ribonucleoprotein polypeptide B2 [Source:ZFIN;Acc:ZDB-GENE-060616-2]	1	52196039	52204292	-1	2	KNOWN	1.033181255	-0.963135553	-0.070045703	2	NA
ENSDARG00000039512	ap1m3	ENSDARG00000039512	114.3331207	1.535058557	2.990795879	1.912788134	0.042776437	0.000113784	0.005741988	X30 - X0_X3 - X0_X7 - X0	adaptor-related protein complex 1, mu 3 subunit [Source:ZFIN;Acc:ZDB-GENE-040801-159]	6	33736843	33773251	1	1	KNOWN	1.118030073	-0.809028169	-0.309001905	2	NA
ENSDARG00000039576	fstl1b	ENSDARG00000039576	1516.861821	2.352751445	4.707969982	5.927645153	0.004850526	8.27E-05	3.41E-05	X30 - X0_X3 - X0_X7 - X0	follistatin-like 1b [Source:ZFIN;Acc:ZDB-GENE-030131-3029]	9	9956905	10063561	-1	4	KNOWN	0.208288955	-1.087740829	0.879451874	4	NA
ENSDARG00000039616	cenpk	ENSDARG00000039616	60.29293997	2.890549757	13.11082147	7.376640749	0.001786611	5.25E-07	5.61E-06	X30 - X0_X3 - X0_X7 - X0	centromere protein K [Source:ZFIN;Acc:ZDB-GENE-090313-204]	1	30962711	30970084	-1	5	KNOWN	1.038129264	-0.956918174	-0.08121109	2	NA
ENSDARG00000039641	rpl26	ENSDARG00000039641	8711.773951	1.506204207	2.863244215	2.394703693	0.003251812	4.53E-06	1.85E-05	X30 - X0_X3 - X0_X7 - X0	ribosomal protein L26 [Source:ZFIN;Acc:ZDB-GENE-040426-2117]	14	53369688	53374265	-1	1	KNOWN	0.88286314	-1.085958146	0.203095006	3	NA
ENSDARG00000039677	dsc2l	ENSDARG00000039677	165.5398179	2.363802098	4.278712233	2.976162783	0.048010751	0.001822848	0.015016316	X30 - X0_X3 - X0_X7 - X0	desmocollin 2 like [Source:ZFIN;Acc:ZDB-GENE-031116-55]	20	7437162	7468565	-1	1	KNOWN	1.096650449	-0.861404039	-0.235246411	2	NA
ENSDARG00000039701	emx2	ENSDARG00000039701	71.50250181	2.632294797	6.638218996	6.297753133	0.01144577	7.39E-05	9.78E-05	X30 - X0_X3 - X0_X7 - X0	empty spiracles homeobox 2 [Source:ZFIN;Acc:ZDB-GENE-990415-54]	13	19367592	19372563	1	1	KNOWN	0.652296518	-1.151303965	0.499007448	3	NA
ENSDARG00000039704	cdc42ep4a	ENSDARG00000039704	118.0881048	1.643698227	1.68630996	2.352723825	0.000832477	0.000563748	1.44E-05	X30 - X0_X3 - X0_X7 - X0	CDC42 effector protein (Rho GTPase binding) 4a [Source:ZFIN;Acc:ZDB-GENE-040704-22]	3	47924697	47972071	1	2	KNOWN	-0.522938233	-0.630103485	1.153041718	5	NA
ENSDARG00000039830	gng5	ENSDARG00000039830	517.9835248	1.734704387	4.215085761	3.290933421	0.000778008	7.38E-07	3.00E-06	X30 - X0_X3 - X0_X7 - X0	guanine nucleotide binding protein (G protein), gamma 5 [Source:ZFIN;Acc:ZDB-GENE-030131-9966]	2	5885534	5891553	1	1	KNOWN	0.905310713	-1.073388298	0.168077584	3	NA
ENSDARG00000039863	lifrb	ENSDARG00000039863	328.8980999	4.502039326	29.53339304	17.77517566	0.001951541	2.04E-06	8.85E-06	X30 - X0_X3 - X0_X7 - X0	leukemia inhibitory factor receptor alpha b [Source:ZFIN;Acc:ZDB-GENE-080107-2]	21	20071945	20089326	1	2	KNOWN	0.979228781	-1.019551411	0.040322629	2	NA
ENSDARG00000039880	arpp19b	ENSDARG00000039880	534.5501001	1.695122502	3.862974811	2.744179847	0.00020664	2.17E-07	1.79E-06	X30 - X0_X3 - X0_X7 - X0	cAMP-regulated phosphoprotein 19b [Source:ZFIN;Acc:ZDB-GENE-040426-930]	25	7917286	7926992	-1	2	KNOWN	1.010548718	-0.989106423	-0.021442295	2	NA
ENSDARG00000039884	CABZ01068274.1	ENSDARG00000039884	219.7837541	2.114897141	4.768684495	4.483744548	0.000690172	2.57E-06	3.56E-06	X30 - X0_X3 - X0_X7 - X0	Uncharacterized protein [Source:UniProtKB/TrEMBL;Acc:E7F0I6]	7	12277032	12401591	1	1	KNOWN	0.67237336	-1.149166107	0.476792747	3	NA
ENSDARG00000039900	si:ch73-168d20.1	ENSDARG00000039900	12.9784409	4.545977928	4.815711188	6.84439229	0.035530202	0.027099858	0.009784993	X30 - X0_X3 - X0_X7 - X0	si:ch73-168d20.1 [Source:ZFIN;Acc:ZDB-GENE-121214-44]	23	45253348	45295795	1	2	KNOWN	-0.466669209	-0.681359271	1.148028481	5	NA
ENSDARG00000039913	tmem147	ENSDARG00000039913	1233.572959	1.251687985	1.301547267	1.206372523	0.021501323	0.009370947	0.048079929	X30 - X0_X3 - X0_X7 - X0	transmembrane protein 147 [Source:ZFIN;Acc:ZDB-GENE-040718-187]	16	47854537	47877324	-1	1	KNOWN	1.015528249	-0.031815828	-0.983712422	10	NA
ENSDARG00000039926	lhfpl2b	ENSDARG00000039926	23.24465317	3.578889247	14.11100022	12.83757481	0.032407546	3.29E-05	5.31E-05	X30 - X0_X3 - X0_X7 - X0	lipoma HMGIC fusion partner-like 2b [Source:ZFIN;Acc:ZDB-GENE-050417-10]	5	53592728	53607934	-1	1	KNOWN	0.684559713	-1.147595633	0.46303592	3	NA
ENSDARG00000039963	FGFBP1 (2 of 2)	ENSDARG00000039963	110.0860792	5.215108588	26.78121204	12.95767929	0.003325987	8.74E-06	9.42E-05	X30 - X0_X3 - X0_X7 - X0	fibroblast growth factor binding protein 1 [Source:HGNC Symbol;Acc:19695]	14	49377433	49378020	-1	1	KNOWN_BY_PROJECTION	1.079774926	-0.894238394	-0.185536531	2	NA
ENSDARG00000039974	rai14	ENSDARG00000039974	756.4440794	1.407722943	3.164846971	2.601941011	0.00733714	1.43E-06	5.69E-06	X30 - X0_X3 - X0_X7 - X0	retinoic acid induced 14 [Source:ZFIN;Acc:ZDB-GENE-040718-235]	21	18375725	18436384	1	2	KNOWN	0.861889741	-1.096421809	0.234532067	3	NA
ENSDARG00000040024	gpd1l	ENSDARG00000040024	258.715862	1.328872655	2.394601924	1.810120874	0.020040322	1.23E-05	0.000213973	X30 - X0_X3 - X0_X7 - X0	glycerol-3-phosphate dehydrogenase 1-like [Source:ZFIN;Acc:ZDB-GENE-041010-220]	16	41915162	41933745	-1	2	KNOWN	1.030678084	-0.966201566	-0.064476519	2	NA
ENSDARG00000040036	tcf19l	ENSDARG00000040036	44.31533617	3.742498459	19.6215508	9.163307456	0.001953468	8.31E-07	1.61E-05	X30 - X0_X3 - X0_X7 - X0	transcription factor 19 (SC1), like [Source:ZFIN;Acc:ZDB-GENE-060324-2]	19	7453823	7462941	-1	1	NOVEL	1.087652872	-0.879621645	-0.208031227	2	NA
ENSDARG00000040039	pttg1ipb	ENSDARG00000040039	1686.136595	-1.50873619	-2.071335524	-1.784952689	0.039938691	0.002243488	0.007767466	X30 - X0_X3 - X0_X7 - X0	pituitary tumor-transforming 1 interacting protein b [Source:ZFIN;Acc:ZDB-GENE-041010-10]	9	12931510	12935372	-1	2	KNOWN	-1.005968686	0.993922478	0.012046208	1	NA
ENSDARG00000040041	mcm4	ENSDARG00000040041	475.5440947	7.213569691	35.67897435	22.47613585	3.86E-07	7.06E-09	1.72E-08	X30 - X0_X3 - X0_X7 - X0	MCM4 minichromosome maintenance deficient 4, mitotin (S. cerevisiae) [Source:ZFIN;Acc:ZDB-GENE-030131-9544]	24	37031305	37056313	-1	3	KNOWN	0.975029864	-1.023227144	0.04819728	2	Yes
ENSDARG00000040046	snai2	ENSDARG00000040046	163.0734293	2.595010474	2.44170935	3.896642344	0.030356916	0.029735313	0.002646225	X30 - X0_X3 - X0_X7 - X0	snail homolog 2 (Drosophila) [Source:ZFIN;Acc:ZDB-GENE-030326-6]	24	36882658	36888674	1	2	KNOWN	-0.67057124	-0.478809374	1.149380614	5	NA
ENSDARG00000040067	BX284638.1	ENSDARG00000040067	9.180186904	5.450264196	6.315321078	5.995490183	0.044848917	0.012321082	0.015800379	X30 - X0_X3 - X0_X7 - X0	Uncharacterized protein [Source:UniProtKB/TrEMBL;Acc:F1R6A9]	3	6736623	6737746	-1	1	NOVEL	0.90298825	-1.074759049	0.171770799	3	NA
ENSDARG00000040072	scpep1	ENSDARG00000040072	1344.755702	2.079199744	7.517506897	5.077387256	0.000516283	3.44E-07	1.75E-06	X30 - X0_X3 - X0_X7 - X0	serine carboxypeptidase 1 [Source:ZFIN;Acc:ZDB-GENE-040426-890]	3	36126405	36134372	1	1	KNOWN	0.96410343	-1.032395637	0.068292206	2	NA
ENSDARG00000040076	pycard	ENSDARG00000040076	136.7431457	6.733379604	50.2757694	27.81244628	0.000229256	1.82E-07	9.57E-07	X30 - X0_X3 - X0_X7 - X0	PYD and CARD domain containing [Source:ZFIN;Acc:ZDB-GENE-000511-2]	16	44753492	44759881	-1	2	KNOWN	1.010426816	-0.98923638	-0.021190436	2	NA
ENSDARG00000040080	fli1b	ENSDARG00000040080	192.8347911	2.808640999	8.451178864	7.57807296	0.002022073	6.64E-06	1.05E-05	X30 - X0_X3 - X0_X7 - X0	friend leukemia integration 1b [Source:ZFIN;Acc:ZDB-GENE-031114-3]	16	44787501	44816341	1	5	KNOWN	0.715089867	-1.142710433	0.427620567	3	NA
ENSDARG00000040110	kif20bb	ENSDARG00000040110	147.7419441	3.261965133	14.02844371	8.289506656	0.000235842	2.17E-07	1.38E-06	X30 - X0_X3 - X0_X7 - X0	kinesin family member 20Bb [Source:ZFIN;Acc:ZDB-GENE-030131-9684]	12	17524029	17550668	1	2	KNOWN	1.021282147	-0.977264136	-0.04401801	2	NA
ENSDARG00000040121	psma2	ENSDARG00000040121	1111.251885	1.336441697	2.346916484	1.782676304	0.004961698	2.74E-06	4.93E-05	X30 - X0_X3 - X0_X7 - X0	proteasome (prosome, macropain) subunit, alpha type, 2 [Source:ZFIN;Acc:ZDB-GENE-050522-479]	16	46261526	46269856	1	1	KNOWN	1.036573955	-0.958895451	-0.077678504	2	NA
ENSDARG00000040133	ccrl1b	ENSDARG00000040133	95.52286698	1.468192822	2.366623854	2.016110272	0.028992361	0.000162793	0.000726281	X30 - X0_X3 - X0_X7 - X0	chemokine (C-C motif) receptor-like 1b [Source:ZFIN;Acc:ZDB-GENE-051107-10]	24	11153630	11162899	1	1	KNOWN	0.919391696	-1.064707569	0.145315873	3	NA
ENSDARG00000040158	cdc42l	ENSDARG00000040158	2149.390386	1.401503853	3.887119397	2.528451153	0.007267493	4.92E-07	8.08E-06	X30 - X0_X3 - X0_X7 - X0	cell division cycle 42, like [Source:ZFIN;Acc:ZDB-GENE-030131-6069]	16	34037172	34046453	-1	1	KNOWN	1.029584674	-0.967524653	-0.062060021	2	NA
ENSDARG00000040162	FGFBP3	ENSDARG00000040162	51.6148803	5.263808744	13.03619451	22.32339855	7.70E-06	1.10E-07	2.25E-08	X30 - X0_X3 - X0_X7 - X0	fibroblast growth factor binding protein 3 [Source:HGNC Symbol;Acc:23428]	17	23130654	23132142	1	1	KNOWN_BY_PROJECTION	-0.059119497	-0.969128723	1.02824822	4	NA
ENSDARG00000040163	prim1	ENSDARG00000040163	202.7249159	1.708893162	6.515815109	4.021182113	0.020183644	2.55E-06	2.66E-05	X30 - X0_X3 - X0_X7 - X0	primase polypeptide 1 [Source:ZFIN;Acc:ZDB-GENE-990603-6]	23	18009905	18019625	1	2	KNOWN	1.012401775	-0.987118744	-0.02528303	2	NA
ENSDARG00000040178	havcr1	ENSDARG00000040178	770.84103	2.495079877	35.14467493	16.79599966	0.01348299	5.71E-07	3.57E-06	X30 - X0_X3 - X0_X7 - X0	hepatitis A virus cellular receptor 1 [Source:ZFIN;Acc:ZDB-GENE-040718-131]	21	28496783	28504565	-1	5	KNOWN	1.038667908	-0.956228372	-0.082439536	2	NA
ENSDARG00000040184	syncrip	ENSDARG00000040184	5192.874012	1.207588117	1.649238881	1.380868901	0.019979557	3.66E-05	0.000798881	X30 - X0_X3 - X0_X7 - X0	synaptotagmin binding, cytoplasmic RNA interacting protein [Source:ZFIN;Acc:ZDB-GENE-030131-4862]	20	2760603	2774552	1	9	KNOWN	1.063582308	-0.921142545	-0.142439763	2	NA
ENSDARG00000040192	nenf	ENSDARG00000040192	121.2767071	2.592285029	10.70983965	7.479914258	0.003924356	2.49E-06	1.09E-05	X30 - X0_X3 - X0_X7 - X0	neuron derived neurotrophic factor [Source:ZFIN;Acc:ZDB-GENE-050320-129]	17	45563362	45570477	1	3	KNOWN	0.925518701	-1.060723689	0.135204988	3	NA
ENSDARG00000040224	krcp	ENSDARG00000040224	122.0702792	8.603387226	44.09200547	30.05468613	8.33E-06	3.37E-08	8.36E-08	X30 - X0_X3 - X0_X7 - X0	kelch repeat-containing protein [Source:ZFIN;Acc:ZDB-GENE-030131-2126]	7	26048763	26055725	1	1	KNOWN	0.923668338	-1.061940494	0.138272156	3	NA
ENSDARG00000040250	si:ch211-132g1.1	ENSDARG00000040250	4.780958018	7.709661624	2.539726311	8.874444137	0.000194119	0.007073456	0.000103288	X30 - X0_X3 - X0_X7 - X0	si:ch211-132g1.1 [Source:ZFIN;Acc:ZDB-GENE-090313-24]	1	1672753	1681793	1	2	KNOWN	-1.137345508	0.395947839	0.741397669	6	NA
ENSDARG00000040251	ctsk	ENSDARG00000040251	1043.281466	5.330250497	36.57260391	30.05822321	0.000155502	3.86E-07	6.90E-07	X30 - X0_X3 - X0_X7 - X0	cathepsin K [Source:ZFIN;Acc:ZDB-GENE-001205-4]	16	31753228	31762840	1	1	KNOWN	0.763582086	-1.131928896	0.36834681	3	NA
ENSDARG00000040284	BX005256.1	ENSDARG00000040284	45.16432728	2.557546274	14.98997155	7.265900131	0.021323952	3.73E-06	7.62E-05	X30 - X0_X3 - X0_X7 - X0	Uncharacterized protein [Source:UniProtKB/TrEMBL;Acc:E7F2Z6]	16	27061039	27068162	-1	1	KNOWN	1.070410132	-0.910260544	-0.160149588	2	NA
ENSDARG00000040314	psph	ENSDARG00000040314	238.6128414	1.495574318	3.009397517	1.663370435	0.012792647	1.10E-05	0.002678035	X30 - X0_X3 - X0_X7 - X0	phosphoserine phosphatase [Source:ZFIN;Acc:ZDB-GENE-050809-127]	15	464034	470501	-1	1	KNOWN	1.148783699	-0.675495802	-0.473287897	2	NA
ENSDARG00000040440	snrpd2	ENSDARG00000040440	977.431777	1.28161752	2.752172008	1.851897951	0.006805633	4.06E-07	1.49E-05	X30 - X0_X3 - X0_X7 - X0	small nuclear ribonucleoprotein D2 polypeptide [Source:ZFIN;Acc:ZDB-GENE-040914-10]	18	39172964	39181178	-1	1	KNOWN	1.065891872	-0.917531281	-0.148360591	2	NA
ENSDARG00000040445	PARP14	ENSDARG00000040445	176.1608704	5.676586627	12.59480864	12.91203562	6.76E-06	2.67E-07	2.60E-07	X30 - X0_X3 - X0_X7 - X0	poly (ADP-ribose) polymerase family, member 14 [Source:HGNC Symbol;Acc:29232]	9	24798932	24812870	1	3	KNOWN_BY_PROJECTION	0.538124389	-1.153831434	0.615707045	4	NA
ENSDARG00000040485	dfna5	ENSDARG00000040485	104.0318308	1.852670721	2.412118446	3.621131466	0.024009601	0.002929154	0.000198576	X30 - X0_X3 - X0_X7 - X0	deafness, autosomal dominant 5 [Source:ZFIN;Acc:ZDB-GENE-030131-7662]	16	23509544	23526716	1	3	KNOWN	-0.239543279	-0.858473863	1.098017142	5	NA
ENSDARG00000040492	mthfd1b	ENSDARG00000040492	377.6640173	1.618930027	3.682285023	2.673626948	0.001985929	1.36E-06	1.11E-05	X30 - X0_X3 - X0_X7 - X0	methylenetetrahydrofolate dehydrogenase (NADP+ dependent) 1b [Source:ZFIN;Acc:ZDB-GENE-020905-4]	17	49510284	49568254	-1	4	KNOWN	0.992480114	-1.007353956	0.014873843	2	NA
ENSDARG00000040528	lgals3bpb	ENSDARG00000040528	4996.89998	3.085660002	7.753748567	6.421610324	0.000208593	2.09E-06	4.52E-06	X30 - X0_X3 - X0_X7 - X0	lectin, galactoside-binding, soluble, 3 binding protein b [Source:ZFIN;Acc:ZDB-GENE-040426-2262]	3	58555822	58558177	-1	2	KNOWN	0.831751419	-1.109519842	0.277768423	3	NA
ENSDARG00000040548	eed	ENSDARG00000040548	411.7529386	1.34749371	1.863907397	1.507794866	0.00537463	3.46E-05	0.000667262	X30 - X0_X3 - X0_X7 - X0	embryonic ectoderm development [Source:ZFIN;Acc:ZDB-GENE-050417-287]	1	581650	588290	-1	4	KNOWN	1.100333793	-0.853398092	-0.246935701	2	NA
ENSDARG00000040607	rtfdc1	ENSDARG00000040607	868.6239967	-1.182085505	-1.335125914	-1.266461626	0.041419753	0.002212351	0.00738876	X30 - X0_X3 - X0_X7 - X0	replication termination factor 2 domain containing 1 [Source:ZFIN;Acc:ZDB-GENE-030131-4825]	6	56048378	56110827	1	1	KNOWN	-0.964086368	1.032409522	-0.068323153	1	NA
ENSDARG00000040668	lrtomt	ENSDARG00000040668	10.50353321	2.666423626	27.91551586	11.43219334	0.007074429	3.31E-06	6.63E-05	X30 - X0_X3 - X0_X7 - X0	leucine rich transmembrane and 0-methyltransferase domain containing [Source:ZFIN;Acc:ZDB-GENE-060929-962]	15	42956373	42965953	-1	1	KNOWN	1.085118705	-0.884448292	-0.200670413	2	NA
ENSDARG00000040799	sst1.1	ENSDARG00000040799	111.9496978	-2.245897	-2.55152148	-4.843544805	0.000908262	0.000403472	1.37E-05	X30 - X0_X3 - X0_X7 - X0	somatostatin 1, tandem duplicate 1 [Source:ZFIN;Acc:ZDB-GENE-030131-4743]	15	35424826	35426691	1	1	KNOWN	0.466364993	0.681627741	-1.147992734	7	NA
ENSDARG00000040812	ncf4	ENSDARG00000040812	137.4852137	6.229525162	26.69691916	19.04832698	0.000106149	4.39E-07	1.23E-06	X30 - X0_X3 - X0_X7 - X0	neutrophil cytosolic factor 4 [Source:ZFIN;Acc:ZDB-GENE-041124-1]	22	31776612	31823776	1	3	KNOWN	0.906210728	-1.07285256	0.166641832	3	NA
ENSDARG00000040856	ldha	ENSDARG00000040856	12000.72199	-1.233377187	-1.26121357	-1.614931402	0.032008182	0.020515375	0.000238974	X30 - X0_X3 - X0_X7 - X0	lactate dehydrogenase A4 [Source:ZFIN;Acc:ZDB-GENE-991026-5]	25	25749747	25758098	-1	1	KNOWN	0.51068048	0.641545531	-1.152226011	7	NA
ENSDARG00000040917	cbfb	ENSDARG00000040917	256.4773651	1.668415684	6.214750434	4.266806244	0.005740263	5.01E-07	2.94E-06	X30 - X0_X3 - X0_X7 - X0	core-binding factor, beta subunit [Source:ZFIN;Acc:ZDB-GENE-980526-440]	18	22774824	22852023	1	2	KNOWN	0.949077534	-1.044134128	0.095056594	2	NA
ENSDARG00000040923	crabp2a	ENSDARG00000040923	164.8747096	7.476331299	13.80766478	17.65396212	8.21E-06	8.44E-07	3.84E-07	X30 - X0_X3 - X0_X7 - X0	cellular retinoic acid binding protein 2, a [Source:ZFIN;Acc:ZDB-GENE-020320-4]	16	16678481	16692124	-1	2	KNOWN	0.516052583	-0.801545147	1.316495753	13	NA
ENSDARG00000040946	olig2	ENSDARG00000040946	273.9197108	1.972324976	5.106241359	3.348608243	0.00754625	1.43E-05	0.000136255	X30 - X0_X3 - X0_X7 - X0	oligodendrocyte lineage transcription factor 2 [Source:ZFIN;Acc:ZDB-GENE-030131-4013]	9	33784736	33786843	-1	1	KNOWN	1.038003089	-0.957079381	-0.080923708	2	NA
ENSDARG00000041041	cxcr3.2	ENSDARG00000041041	258.7398168	3.399592996	6.868269142	5.759041928	5.93E-05	1.74E-06	3.77E-06	X30 - X0_X3 - X0_X7 - X0	chemokine (C-X-C motif) receptor 3, tandem duplicate 2 [Source:ZFIN;Acc:ZDB-GENE-041114-186]	16	13568133	13575310	1	2	KNOWN	0.861402698	-1.09665108	0.235248382	3	NA
ENSDARG00000041060	zgc:92326	ENSDARG00000041060	951.6253061	5.276130829	35.10699152	20.56206575	0.000181809	4.82E-07	1.80E-06	X30 - X0_X3 - X0_X7 - X0	zgc:92326 [Source:ZFIN;Acc:ZDB-GENE-040718-159]	15	30351752	30365141	-1	3	KNOWN	0.991617909	-1.008176442	0.016558533	2	NA
ENSDARG00000041108	ctsh	ENSDARG00000041108	751.2485842	2.375713968	8.113082379	6.050850998	0.000700627	1.03E-06	3.31E-06	X30 - X0_X3 - X0_X7 - X0	cathepsin H [Source:ZFIN;Acc:ZDB-GENE-030131-3539]	18	26208613	26215014	1	2	KNOWN	0.894585765	-1.079580184	0.184994419	3	NA
ENSDARG00000041113	wdr18	ENSDARG00000041113	418.0127062	1.386776399	2.666653015	1.810754383	0.019470434	1.38E-05	0.000507541	X30 - X0_X3 - X0_X7 - X0	WD repeat domain 18 [Source:ZFIN;Acc:ZDB-GENE-040905-4]	11	13827675	13974969	1	1	KNOWN	1.09195674	-0.871128887	-0.220827853	2	NA
ENSDARG00000041150	slc17a6b	ENSDARG00000041150	2003.956836	-1.249443615	-1.83971697	-1.398787539	0.022441098	3.71E-05	0.002232907	X30 - X0_X3 - X0_X7 - X0	solute carrier family 17 (sodium-dependent inorganic phosphate cotransporter), member 6b [Source:ZFIN;Acc:ZDB-GENE-030616-554]	7	34146415	34167765	-1	3	KNOWN	-1.120001235	0.803306854	0.316694381	6	NA
ENSDARG00000041173	adra1bb	ENSDARG00000041173	43.53933615	-1.774188346	-1.700512939	-1.609049854	0.002986597	0.004401611	0.007180022	X30 - X0_X3 - X0_X7 - X0	adrenergic receptor, alpha 1bb [Source:ZFIN;Acc:ZDB-GENE-041114-51]	14	45797805	45816079	1	1	KNOWN	-0.071670677	-0.962236545	1.033907222	4	NA
ENSDARG00000041180	il10ra	ENSDARG00000041180	152.8721887	1.96538691	5.689876995	4.376979501	0.013399559	2.24E-05	8.37E-05	X30 - X0_X3 - X0_X7 - X0	interleukin 10 receptor, alpha [Source:ZFIN;Acc:ZDB-GENE-070905-4]	15	13073800	13084347	-1	1	KNOWN	0.888869835	-1.082739557	0.193869722	3	NA
ENSDARG00000041182	rpl4	ENSDARG00000041182	18576.88124	1.46539913	3.029638631	2.408818519	0.001315	7.01E-07	3.67E-06	X30 - X0_X3 - X0_X7 - X0	ribosomal protein L4 [Source:ZFIN;Acc:ZDB-GENE-030131-9034]	18	19231781	19236980	-1	3	KNOWN	0.924723301	-1.061248211	0.136524911	3	NA
ENSDARG00000041190	SH3D21	ENSDARG00000041190	48.20168546	3.031323011	5.915539094	5.002752343	0.001099253	2.04E-05	5.14E-05	X30 - X0_X3 - X0_X7 - X0	SH3 domain containing 21 [Source:HGNC Symbol;Acc:26236]	16	39881005	39914131	-1	6	KNOWN_BY_PROJECTION	0.858584177	-1.097966081	0.239381904	3	NA
ENSDARG00000041232	rps29	ENSDARG00000041232	5111.566322	1.3680617	2.654292398	2.133294113	0.004661392	1.85E-06	1.20E-05	X30 - X0_X3 - X0_X7 - X0	ribosomal protein S29 [Source:ZFIN;Acc:ZDB-GENE-040622-5]	20	54434492	54441100	1	1	KNOWN	0.931126758	-1.056961908	0.125835151	3	NA
ENSDARG00000041361	ttk	ENSDARG00000041361	198.9726909	6.013251656	37.84705264	23.31739592	0.000166153	2.18E-07	8.15E-07	X30 - X0_X3 - X0_X7 - X0	ttk protein kinase [Source:ZFIN;Acc:ZDB-GENE-030123-1]	16	6344535	6377256	-1	3	KNOWN	0.9697213	-1.027751477	0.058030177	2	NA
ENSDARG00000041381	arntl2	ENSDARG00000041381	76.60781134	3.691238864	7.069631984	7.028275633	1.35E-05	4.12E-07	4.33E-07	X30 - X0_X3 - X0_X7 - X0	aryl hydrocarbon receptor nuclear translocator-like 2 [Source:ZFIN;Acc:ZDB-GENE-000509-2]	18	15249987	15289314	-1	3	KNOWN	0.587983494	-1.154634854	0.56665136	4	NA
ENSDARG00000041411	rad51	ENSDARG00000041411	64.14559836	2.162620562	12.1857781	6.97312897	0.032644883	3.11E-06	3.19E-05	X30 - X0_X3 - X0_X7 - X0	RAD51 homolog (RecA homolog, E. coli) (S. cerevisiae) [Source:ZFIN;Acc:ZDB-GENE-040426-2286]	20	46678960	46693134	1	4	KNOWN	1.013101957	-0.986361689	-0.026740268	2	NA
ENSDARG00000041418	cyp2aa11	ENSDARG00000041418	14.0714778	3.194163647	6.907904477	9.6092317	0.019584571	0.000296856	6.73E-05	X30 - X0_X3 - X0_X7 - X0	cytochrome P450, family 2, subfamily AA, polypeptide 11 [Source:ZFIN;Acc:ZDB-GENE-110114-3]	23	42958102	42969656	-1	2	KNOWN	0.104777997	-1.048263578	0.943485581	4	NA
ENSDARG00000041435	uba52	ENSDARG00000041435	7435.466393	1.319532425	2.375597699	1.987838577	0.018247983	1.11E-05	6.40E-05	X30 - X0_X3 - X0_X7 - X0	ubiquitin A-52 residue ribosomal protein fusion product 1 [Source:ZFIN;Acc:ZDB-GENE-051023-7]	2	56552145	56561814	-1	1	KNOWN	0.900914069	-1.075969129	0.17505506	3	NA
ENSDARG00000041493	ipo4	ENSDARG00000041493	524.4013917	1.441390958	3.028875983	1.90710109	0.004341308	1.88E-06	9.93E-05	X30 - X0_X3 - X0_X7 - X0	importin 4 [Source:ZFIN;Acc:ZDB-GENE-041014-307]	24	12655969	12734082	-1	2	KNOWN	1.106690922	-0.838698579	-0.267992344	2	NA
ENSDARG00000041505	itm2bb	ENSDARG00000041505	1321.981365	1.576242894	3.364762853	2.957871512	0.003947722	3.91E-06	9.71E-06	X30 - X0_X3 - X0_X7 - X0	integral membrane protein 2Bb [Source:ZFIN;Acc:ZDB-GENE-040426-2139]	9	26364250	26379928	1	2	KNOWN	0.780603685	-1.127182712	0.346579026	3	NA
ENSDARG00000041530	ppih	ENSDARG00000041530	312.4821681	1.326362586	3.356717771	2.207735021	0.02322764	1.25E-06	3.07E-05	X30 - X0_X3 - X0_X7 - X0	peptidylprolyl isomerase H (cyclophilin H) [Source:ZFIN;Acc:ZDB-GENE-040625-127]	8	49308843	49362538	-1	4	KNOWN	1.040925336	-0.953308869	-0.087616467	2	NA
ENSDARG00000041575	trmt10c	ENSDARG00000041575	148.9516544	1.292380177	1.48491973	1.307361177	0.02983939	0.002844795	0.023816602	X30 - X0_X3 - X0_X7 - X0	tRNA methyltransferase 10 homolog C (S. cerevisiae) [Source:ZFIN;Acc:ZDB-GENE-041114-12]	1	382415	388483	-1	5	KNOWN	1.151872984	-0.645875552	-0.505997432	2	NA
ENSDARG00000041599	zgc:91860	ENSDARG00000041599	3334.066668	-1.326906412	-2.181531434	-1.953156631	0.010601565	1.30E-05	4.00E-05	X30 - X0_X3 - X0_X7 - X0	zgc:91860 [Source:ZFIN;Acc:ZDB-GENE-040704-34]	18	17087674	17120836	1	2	KNOWN	-0.815856989	1.115588745	-0.299731756	1	NA
ENSDARG00000041619	gnb2l1	ENSDARG00000041619	14445.34509	1.664029044	3.39873995	2.833158619	0.000503883	9.45E-07	3.06E-06	X30 - X0_X3 - X0_X7 - X0	guanine nucleotide binding protein (G protein), beta polypeptide 2-like 1 [Source:ZFIN;Acc:ZDB-GENE-990415-89]	14	6912871	6919881	1	1	KNOWN	0.866712008	-1.094118988	0.22740698	3	NA
ENSDARG00000041703	rrbp1b	ENSDARG00000041703	546.1100209	1.46491824	2.230266602	1.961385833	0.003712518	2.13E-05	8.13E-05	X30 - X0_X3 - X0_X7 - X0	ribosome binding protein 1 homolog b (dog) [Source:ZFIN;Acc:ZDB-GENE-030429-36]	22	25559412	25582331	1	1	KNOWN	0.88788851	-1.083272414	0.195383905	3	NA
ENSDARG00000041723	zgc:55461	ENSDARG00000041723	321.9586382	2.488521252	9.892150082	5.287178513	0.000256079	2.38E-07	2.62E-06	X30 - X0_X3 - X0_X7 - X0	zgc:55461 [Source:ZFIN;Acc:ZDB-GENE-040426-2879]	5	34636662	34639912	-1	1	KNOWN	1.070755072	-0.909693821	-0.161061251	2	NA
ENSDARG00000041724	glipr2	ENSDARG00000041724	108.3567956	2.100158173	7.288115489	5.034875737	0.002197284	9.57E-07	4.82E-06	X30 - X0_X3 - X0_X7 - X0	GLI pathogenesis-related 2 [Source:ZFIN;Acc:ZDB-GENE-030131-4424]	5	34645981	34657568	-1	2	KNOWN	0.953476042	-1.040797041	0.087321	2	NA
ENSDARG00000041754	cct2	ENSDARG00000041754	2518.38946	1.233773171	1.907673972	1.421254658	0.013524043	7.84E-06	0.000623592	X30 - X0_X3 - X0_X7 - X0	chaperonin containing TCP1, subunit 2 (beta) [Source:ZFIN;Acc:ZDB-GENE-020419-6]	14	37904307	37910068	-1	1	KNOWN	1.111975415	-0.825492823	-0.286482592	2	NA
ENSDARG00000041792	cx28.1	ENSDARG00000041792	66.03928479	4.2091884	68.14476746	32.29053387	0.007764533	9.91E-08	8.50E-07	X30 - X0_X3 - X0_X7 - X0	connexin 28.1 [Source:ZFIN;Acc:ZDB-GENE-070320-1]	20	40771695	40772438	1	1	KNOWN	1.037970826	-0.957120578	-0.080850248	2	NA
ENSDARG00000041811	rps25	ENSDARG00000041811	7636.387531	1.460474014	2.94323726	2.257858022	0.007764055	5.89E-06	4.88E-05	X30 - X0_X3 - X0_X7 - X0	ribosomal protein S25 [Source:ZFIN;Acc:ZDB-GENE-040426-1788]	10	40466686	40471984	-1	2	KNOWN	0.973894983	-1.024205737	0.050310754	2	NA
ENSDARG00000041828	si:dkeyp-28d2.4	ENSDARG00000041828	48.89831274	4.927245079	99.38751541	47.83950835	0.042623068	9.94E-07	8.77E-06	X30 - X0_X3 - X0_X7 - X0	si:dkeyp-28d2.4 [Source:ZFIN;Acc:ZDB-GENE-091204-68]	24	12816474	12819193	1	2	KNOWN	1.029041535	-0.96817828	-0.060863255	2	NA
ENSDARG00000041848	rh50	ENSDARG00000041848	26.13079557	3.003393231	7.854169157	6.720759636	0.016459445	0.000111269	0.000259219	X30 - X0_X3 - X0_X7 - X0	Rh50-like protein [Source:ZFIN;Acc:ZDB-GENE-000427-1]	8	38371549	38375675	-1	1	KNOWN	0.786099694	-1.125535651	0.339435957	3	NA
ENSDARG00000041874	SLC7A1 (2 of 2)	ENSDARG00000041874	62.57135948	3.397560291	9.525388138	7.646734702	0.003485152	2.31E-05	6.14E-05	X30 - X0_X3 - X0_X7 - X0	solute carrier family 7 (cationic amino acid transporter, y+ system), member 1 [Source:HGNC Symbol;Acc:11057]	15	7230125	7250301	-1	1	KNOWN_BY_PROJECTION	0.850106643	-1.101802183	0.25169554	3	NA
ENSDARG00000041911	si:ch211-245h14.1	ENSDARG00000041911	71.9800786	3.515862494	6.210684771	5.876430011	0.000390789	1.22E-05	1.61E-05	X30 - X0_X3 - X0_X7 - X0	si:ch211-245h14.1 [Source:ZFIN;Acc:ZDB-GENE-041014-350]	20	38542150	38550176	-1	4	KNOWN	0.687378073	-1.147202284	0.459824211	3	NA
ENSDARG00000041959	cxcr4b	ENSDARG00000041959	453.7829658	3.9523246	7.296817616	7.21401109	3.75E-05	2.13E-06	2.19E-06	X30 - X0_X3 - X0_X7 - X0	chemokine (C-X-C motif), receptor 4b [Source:ZFIN;Acc:ZDB-GENE-010614-1]	9	10917685	10919710	1	1	KNOWN	0.598919883	-1.154428497	0.555508613	4	NA
ENSDARG00000041980	fam26f	ENSDARG00000041980	70.85308264	5.073003408	25.22728354	16.20185783	8.12E-05	1.01E-07	4.22E-07	X30 - X0_X3 - X0_X7 - X0	family with sequence similarity 26, member F [Source:ZFIN;Acc:ZDB-GENE-061201-60]	16	34541134	34547933	-1	1	KNOWN	0.963463739	-1.03291534	0.069451601	2	NA
ENSDARG00000041991	rrp9	ENSDARG00000041991	268.7087188	1.255382969	3.096321902	1.796185784	0.045577506	1.35E-06	0.000174746	X30 - X0_X3 - X0_X7 - X0	ribosomal RNA processing 9, small subunit (SSU) processome component, homolog (yeast) [Source:ZFIN;Acc:ZDB-GENE-060427-1]	11	37056569	37070935	-1	2	KNOWN	1.106546383	-0.839046401	-0.267499982	2	NA
ENSDARG00000042000	si:ch211-63o20.7	ENSDARG00000042000	33.87416479	9.742935035	66.39164089	34.93366036	0.000577687	4.44E-07	3.49E-06	X30 - X0_X3 - X0_X7 - X0	si:ch211-63o20.7 [Source:ZFIN;Acc:ZDB-GENE-041001-194]	20	34727018	34736136	-1	2	KNOWN	1.034769148	-0.961163357	-0.073605791	2	NA
ENSDARG00000042054	zgc:171971	ENSDARG00000042054	331.7543153	-1.266590157	-1.70164326	-1.409500646	0.046219394	0.000532447	0.007680281	X30 - X0_X3 - X0_X7 - X0	zgc:171971 [Source:ZFIN;Acc:ZDB-GENE-070928-37]	12	7940900	7953126	-1	1	KNOWN	-1.093109886	0.868786355	0.224323531	6	NA
ENSDARG00000042094	eef2a.1	ENSDARG00000042094	268.9345702	1.938537793	4.991301855	3.50401895	0.000314132	3.38E-07	2.17E-06	X30 - X0_X3 - X0_X7 - X0	eukaryotic translation elongation factor 2a, tandem duplicate 1 [Source:ZFIN;Acc:ZDB-GENE-050522-500]	22	20453726	20461754	1	3	KNOWN	0.991353073	-1.008428244	0.017075171	2	NA
ENSDARG00000042126	ELMO3	ENSDARG00000042126	828.7047368	1.403036639	2.603645226	2.386603056	0.022840613	2.36E-05	4.73E-05	X30 - X0_X3 - X0_X7 - X0	engulfment and cell motility 3 [Source:HGNC Symbol;Acc:17289]	25	17790723	17835572	1	1	KNOWN_BY_PROJECTION	0.738604572	-1.137968315	0.399363743	3	NA
ENSDARG00000042172	c7a	ENSDARG00000042172	1082.967387	2.368037032	12.12230838	7.848216828	0.000820771	3.41E-07	1.36E-06	X30 - X0_X3 - X0_X7 - X0	complement component 7a [Source:ZFIN;Acc:ZDB-GENE-081104-392]	8	32721034	32748758	1	2	KNOWN	0.956350486	-1.038572701	0.082222216	2	NA
ENSDARG00000042213	si:ch211-233h19.2	ENSDARG00000042213	401.1764871	-1.325737387	-1.971075383	-1.687532556	0.044144049	0.000293013	0.001564188	X30 - X0_X3 - X0_X7 - X0	si:ch211-233h19.2 [Source:ZFIN;Acc:ZDB-GENE-061009-14]	18	8382369	8420176	1	2	KNOWN	-0.957237773	1.037879009	-0.080641236	1	NA
ENSDARG00000042221	mthfd1l	ENSDARG00000042221	169.6918251	10.10098982	62.9827448	52.04553911	0.000844175	1.57E-06	2.61E-06	X30 - X0_X3 - X0_X7 - X0	methylenetetrahydrofolate dehydrogenase (NADP+ dependent) 1-like [Source:ZFIN;Acc:ZDB-GENE-041001-133]	20	26507804	26561774	-1	5	KNOWN	0.762065843	-1.132326298	0.370260455	3	NA
ENSDARG00000042357	cldnk	ENSDARG00000042357	781.4003446	1.56171608	1.630444831	1.669624517	0.018094803	0.010302231	0.010334817	X30 - X0_X3 - X0_X7 - X0	claudin k [Source:ZFIN;Acc:ZDB-GENE-040801-201]	3	47637817	47641978	1	1	KNOWN	0.180316796	-1.07789034	0.897573545	4	NA
ENSDARG00000042370	AL844186.1	ENSDARG00000042370	4.35864966	2.375703447	7.468445458	7.305197139	0.028355004	0.000663747	0.000645904	X30 - X0_X3 - X0_X7 - X0	Uncharacterized protein [Source:UniProtKB/TrEMBL;Acc:E7EZR6]	17	28030320	28031417	-1	1	NOVEL	0.605322117	-1.154241267	0.548919149	4	NA
ENSDARG00000042389	RPL37A	ENSDARG00000042389	7885.195346	1.396709674	2.684367342	2.124516706	0.008669153	5.47E-06	4.10E-05	X30 - X0_X3 - X0_X7 - X0	ribosomal protein L37a [Source:HGNC Symbol;Acc:10348]	11	45983278	45988442	1	1	KNOWN_BY_PROJECTION	0.953820662	-1.040532197	0.086711535	2	NA
ENSDARG00000042440	p2rx7	ENSDARG00000042440	108.5312875	1.428029071	2.386473145	3.09637581	0.018606767	4.52E-05	5.96E-06	X30 - X0_X3 - X0_X7 - X0	purinergic receptor P2X, ligand-gated ion channel, 7 [Source:ZFIN;Acc:ZDB-GENE-030319-6]	8	31606211	31627143	-1	2	KNOWN	0.098951112	-1.045797044	0.946845933	4	NA
ENSDARG00000042458	rfc4	ENSDARG00000042458	101.5429823	1.700470621	6.10893527	4.304130978	0.024500102	2.35E-06	1.43E-05	X30 - X0_X3 - X0_X7 - X0	replication factor C (activator 1) 4 [Source:ZFIN;Acc:ZDB-GENE-040824-3]	11	46549102	46552409	1	2	KNOWN	0.934496393	-1.054647012	0.120150619	2	NA
ENSDARG00000042496	parp12a	ENSDARG00000042496	249.3259974	3.450668917	8.100301196	7.212822402	0.000854619	1.07E-05	1.71E-05	X30 - X0_X3 - X0_X7 - X0	poly (ADP-ribose) polymerase family, member 12a [Source:ZFIN;Acc:ZDB-GENE-050419-6]	18	12287679	12306569	-1	1	KNOWN	0.747707188	-1.135890647	0.388183459	3	NA
ENSDARG00000042502	h2afvb	ENSDARG00000042502	2766.850693	1.63669589	3.538861148	2.860784732	0.000319563	3.71E-07	1.40E-06	X30 - X0_X3 - X0_X7 - X0	H2A histone family, member Vb [Source:ZFIN;Acc:ZDB-GENE-050506-24]	10	46362731	46372778	-1	1	KNOWN	0.892148726	-1.080938906	0.18879018	3	NA
ENSDARG00000042527	unga	ENSDARG00000042527	88.70547696	1.965859289	7.29564675	4.998418326	0.00307303	4.60E-07	2.71E-06	X30 - X0_X3 - X0_X7 - X0	uracil-DNA glycosylase a [Source:ZFIN;Acc:ZDB-GENE-040426-900]	5	70347706	70362237	-1	3	KNOWN	0.950999038	-1.042686104	0.091687066	2	NA
ENSDARG00000042530	nup205	ENSDARG00000042530	857.7621032	1.170883759	1.547547038	1.350267264	0.032350958	6.22E-05	0.000855463	X30 - X0_X3 - X0_X7 - X0	nucleoporin 205 [Source:ZFIN;Acc:ZDB-GENE-040715-8]	18	11684599	11719423	-1	4	KNOWN	1.015455564	-0.983792377	-0.031663186	2	NA
ENSDARG00000042545	sema3ga	ENSDARG00000042545	190.9328499	-1.29581303	-1.631800055	-1.33978862	0.034234896	0.001068097	0.020697927	X30 - X0_X3 - X0_X7 - X0	semaphorin 3ga [Source:ZFIN;Acc:ZDB-GENE-050513-3]	8	26503172	26550222	-1	3	KNOWN	-1.146299996	0.693554478	0.452745518	6	NA
ENSDARG00000042558	zgc:63691	ENSDARG00000042558	21.49152893	2.149298863	4.870676299	4.407430645	0.007869685	1.81E-05	3.39E-05	X30 - X0_X3 - X0_X7 - X0	zgc:63691 [Source:ZFIN;Acc:ZDB-GENE-040426-1240]	1	60313792	60320004	1	2	KNOWN	0.72907938	-1.139995971	0.410916591	3	NA
ENSDARG00000042563	MIS18BP1	ENSDARG00000042563	100.5525498	4.622127755	29.2824988	15.2660473	0.000103445	6.49E-08	4.12E-07	X30 - X0_X3 - X0_X7 - X0	MIS18 binding protein 1 [Source:HGNC Symbol;Acc:20190]	17	28671326	28681984	1	2	KNOWN_BY_PROJECTION	1.042342272	-0.95145237	-0.090889902	2	NA
ENSDARG00000042566	rps7	ENSDARG00000042566	12964.63037	1.562351334	3.084266502	2.441082029	0.00107528	1.43E-06	7.94E-06	X30 - X0_X3 - X0_X7 - X0	ribosomal protein S7 [Source:ZFIN;Acc:ZDB-GENE-040426-1718]	20	30398260	30403129	-1	1	KNOWN	0.944646342	-1.047416613	0.102770271	2	NA
ENSDARG00000042577	batf3	ENSDARG00000042577	4.80502051	6.410172072	6.163874769	6.075530007	0.024561556	0.028066863	0.032407546	X30 - X0_X3 - X0_X7 - X0	basic leucine zipper transcription factor, ATF-like 3 [Source:ZFIN;Acc:ZDB-GENE-041014-356]	20	37837307	37838471	-1	1	KNOWN	-0.303598465	1.116615785	-0.813017319	1	NA
ENSDARG00000042595	P2RY6	ENSDARG00000042595	42.72872872	2.140023045	7.095352891	5.626544524	0.020866296	1.57E-05	4.71E-05	X30 - X0_X3 - X0_X7 - X0	pyrimidinergic receptor P2Y, G-protein coupled, 6 [Source:HGNC Symbol;Acc:8543]	18	2711904	2712887	1	1	KNOWN_BY_PROJECTION	0.841337453	-1.105587311	0.264249858	3	NA
ENSDARG00000042620	zgc:162356	ENSDARG00000042620	1976.333038	-1.237824656	-1.628720646	-1.474773413	0.026021231	0.000173165	0.000777692	X30 - X0_X3 - X0_X7 - X0	zgc:162356 [Source:ZFIN;Acc:ZDB-GENE-090507-1]	19	749004	754780	1	3	KNOWN	-0.922316262	1.062822103	-0.140505841	1	NA
ENSDARG00000042637	tert	ENSDARG00000042637	52.94459813	3.859233567	4.814506156	5.988750414	3.84E-05	1.04E-05	3.27E-06	X30 - X0_X3 - X0_X7 - X0	telomerase reverse transcriptase [Source:ZFIN;Acc:ZDB-GENE-080405-1]	19	606603	621582	1	5	KNOWN	-0.068430799	-0.964027016	1.032457814	4	NA
ENSDARG00000042652	rreb1b	ENSDARG00000042652	265.1266828	1.549125103	2.342995862	2.267475207	0.017603671	0.000268753	0.000362478	X30 - X0_X3 - X0_X7 - X0	ras responsive element binding protein 1b [Source:ZFIN;Acc:ZDB-GENE-070912-273]	2	20840352	20858154	1	1	KNOWN	0.661379645	-1.150404848	0.489025203	3	NA
ENSDARG00000042688	bora	ENSDARG00000042688	51.79485185	2.919878078	19.11578447	9.885528516	0.001471014	1.22E-07	1.40E-06	X30 - X0_X3 - X0_X7 - X0	bora, aurora kinase A activator [Source:ZFIN;Acc:ZDB-GENE-041114-165]	1	29779637	29791053	1	4	KNOWN	1.04321476	-0.950299838	-0.092914922	2	NA
ENSDARG00000042708	tuba8l	ENSDARG00000042708	2716.646752	4.448076769	43.44214911	17.88973009	2.82E-06	7.18E-09	3.23E-08	X30 - X0_X3 - X0_X7 - X0	tubulin, alpha 8 like [Source:ZFIN;Acc:ZDB-GENE-030131-9167]	8	29198441	29202948	-1	1	KNOWN	1.086202248	-0.882399676	-0.203802572	2	Yes
ENSDARG00000042722	blnk	ENSDARG00000042722	104.4470641	4.382611606	44.00313511	20.33026223	0.006475523	9.67E-07	9.54E-06	X30 - X0_X3 - X0_X7 - X0	B-cell linker [Source:ZFIN;Acc:ZDB-GENE-040702-4]	13	51494234	51543077	-1	2	KNOWN	1.058308871	-0.929137872	-0.129170999	2	NA
ENSDARG00000042725	cebpb	ENSDARG00000042725	761.5034088	2.450670667	9.874935584	4.876222391	0.010977899	1.78E-05	0.000272107	X30 - X0_X3 - X0_X7 - X0	CCAAT/enhancer binding protein (C/EBP), beta [Source:ZFIN;Acc:ZDB-GENE-020111-3]	8	29301377	29302892	-1	1	KNOWN	1.093844913	-0.867277696	-0.226567218	2	NA
ENSDARG00000042732	tmem189	ENSDARG00000042732	648.7151095	1.33592084	2.400768569	1.787736879	0.015067795	9.57E-06	0.00021041	X30 - X0_X3 - X0_X7 - X0	transmembrane protein 189 [Source:ZFIN;Acc:ZDB-GENE-041010-150]	8	29306638	29318415	1	1	KNOWN	1.04647579	-0.94592728	-0.10054851	2	NA
ENSDARG00000042793	tpp1	ENSDARG00000042793	597.4081555	1.517166575	5.594484726	3.869975034	0.019748389	9.99E-07	6.08E-06	X30 - X0_X3 - X0_X7 - X0	tripeptidyl peptidase I [Source:ZFIN;Acc:ZDB-GENE-030131-6654]	17	30902991	30914902	1	4	KNOWN	0.944902462	-1.047229017	0.102326554	2	NA
ENSDARG00000042811	fgf1b	ENSDARG00000042811	251.0522245	-1.664086955	-2.998622249	-3.194223253	0.020716039	0.000234598	0.000153152	X30 - X0_X3 - X0_X7 - X0	fibroblast growth factor 1b [Source:ZFIN;Acc:ZDB-GENE-071004-7]	21	42662924	42666251	1	1	KNOWN	-0.455907857	1.146709075	-0.690801218	1	NA
ENSDARG00000042816	mmp9	ENSDARG00000042816	5062.495439	46.43492404	211.529457	157.7242731	3.47E-07	3.71E-08	5.46E-08	X30 - X0_X3 - X0_X7 - X0	matrix metalloproteinase 9 [Source:ZFIN;Acc:ZDB-GENE-040426-2132]	8	25134455	25148890	1	2	KNOWN	0.866599796	-1.094173256	0.227573459	3	Yes
ENSDARG00000042833	RFFL (2 of 2)	ENSDARG00000042833	72.01624794	1.659318841	5.183863463	3.651396836	0.01592596	2.43E-06	1.84E-05	X30 - X0_X3 - X0_X7 - X0	ring finger and FYVE-like domain containing E3 ubiquitin protein ligase [Source:HGNC Symbol;Acc:24821]	15	4408041	4439536	-1	1	KNOWN_BY_PROJECTION	0.953832823	-1.040522843	0.08669002	2	NA
ENSDARG00000042835	tfdp2	ENSDARG00000042835	220.5732956	1.480442786	1.67938919	2.231113867	0.041901406	0.01001852	0.000756788	X30 - X0_X3 - X0_X7 - X0	transcription factor Dp-2 [Source:ZFIN;Acc:ZDB-GENE-030219-104]	15	4286776	4387187	-1	2	KNOWN	-0.302368139	-0.81392221	1.116290349	5	NA
ENSDARG00000042874	phlda2	ENSDARG00000042874	59.42849193	2.558381987	10.60802328	7.087691893	0.031607956	1.80E-05	0.000113786	X30 - X0_X3 - X0_X7 - X0	pleckstrin homology-like domain, family A, member 2 [Source:ZFIN;Acc:ZDB-GENE-050522-73]	25	24248137	24249419	-1	1	KNOWN	0.955719167	-1.03906423	0.083345064	2	NA
ENSDARG00000042876	abracl	ENSDARG00000042876	647.6916239	4.446159698	32.53644594	18.21764147	3.32E-05	5.22E-08	1.82E-07	X30 - X0_X3 - X0_X7 - X0	ABRA C-terminal like [Source:ZFIN;Acc:ZDB-GENE-030131-8594]	20	36831006	36842803	1	3	KNOWN	1.006431125	-0.993442339	-0.012988786	2	NA
ENSDARG00000042880	si:ch211-222f23.6	ENSDARG00000042880	11.34543303	-2.210281112	-6.455603818	-3.623168597	0.001723149	1.78E-05	0.000120103	X30 - X0_X3 - X0_X7 - X0	si:ch211-222f23.6 [Source:ZFIN;Acc:ZDB-GENE-070912-208]	9	1473893	1488380	-1	1	KNOWN	-1.091309324	0.872431298	0.218878025	6	NA
ENSDARG00000042894	tyms	ENSDARG00000042894	246.4978221	11.75825038	90.03795605	41.73356066	4.43E-08	7.93E-10	2.09E-09	X30 - X0_X3 - X0_X7 - X0	thymidylate synthase [Source:ZFIN;Acc:ZDB-GENE-040426-59]	7	75222916	75229200	1	1	KNOWN	1.068331754	-0.913639786	-0.154691967	2	Yes
ENSDARG00000042905	rpl10a	ENSDARG00000042905	11632.16733	1.48399185	2.982118427	2.433820364	0.003822414	3.15E-06	1.52E-05	X30 - X0_X3 - X0_X7 - X0	ribosomal protein L10a [Source:ZFIN;Acc:ZDB-GENE-030131-2025]	8	24591065	24595928	1	4	KNOWN	0.899948441	-1.076527972	0.176579531	3	NA
ENSDARG00000042925	mfng	ENSDARG00000042925	298.7284863	2.24352151	10.02480694	6.562486288	0.001667332	5.17E-07	2.67E-06	X30 - X0_X3 - X0_X7 - X0	manic fringe homolog [Source:ZFIN;Acc:ZDB-GENE-041130-1]	22	15397135	15426246	-1	1	KNOWN	0.961363253	-1.034608988	0.073245734	2	NA
ENSDARG00000042927	mapre1a	ENSDARG00000042927	475.2273121	1.661868128	7.110478566	4.413303866	0.003712735	2.20E-07	1.81E-06	X30 - X0_X3 - X0_X7 - X0	microtubule-associated protein, RP/EB family, member 1a [Source:ZFIN;Acc:ZDB-GENE-030131-6067]	8	24234892	24241588	1	4	KNOWN	0.996663962	-1.003302981	0.006639019	2	NA
ENSDARG00000042931	mibp2	ENSDARG00000042931	2398.880572	1.968069792	4.335931293	3.989202324	4.40E-05	1.74E-07	2.53E-07	X30 - X0_X3 - X0_X7 - X0	muscle-specific beta 1 integrin binding protein 2 [Source:ZFIN;Acc:ZDB-GENE-031113-14]	18	4945257	4951035	-1	1	KNOWN	0.707588357	-1.144040367	0.43645201	3	NA
ENSDARG00000043004	si:dkeyp-117h8.4	ENSDARG00000043004	51.92051008	5.382038478	21.61799575	15.16799114	3.53E-05	8.79E-08	2.77E-07	X30 - X0_X3 - X0_X7 - X0	si:dkeyp-117h8.4 [Source:ZFIN;Acc:ZDB-GENE-030804-4]	20	25669077	25674757	-1	5	KNOWN	0.925025285	-1.06104933	0.136024045	3	NA
ENSDARG00000043032	tlr1	ENSDARG00000043032	62.74850962	3.129784966	7.139556272	7.632662319	0.000282385	2.20E-06	1.72E-06	X30 - X0_X3 - X0_X7 - X0	toll-like receptor 1 [Source:ZFIN;Acc:ZDB-GENE-040220-1]	14	733852	738712	-1	1	KNOWN	0.474636067	-1.148932235	0.674296169	4	NA
ENSDARG00000043059	VDR (1 of 2)	ENSDARG00000043059	36.0927479	-1.348099627	-2.258729209	-1.670123165	0.037916265	0.000143722	0.002413518	X30 - X0_X3 - X0_X7 - X0	vitamin D (1,25- dihydroxyvitamin D3) receptor [Source:HGNC Symbol;Acc:12679]	23	46201462	46205599	-1	1	KNOWN_BY_PROJECTION	-1.082232749	0.889798476	0.192434273	6	NA
ENSDARG00000043081	ctsz	ENSDARG00000043081	1550.627805	1.79061342	14.17484414	6.825110809	0.005897343	1.11E-07	1.12E-06	X30 - X0_X3 - X0_X7 - X0	cathepsin Z [Source:ZFIN;Acc:ZDB-GENE-041010-139]	6	49723038	49733028	1	3	KNOWN	1.056182254	-0.932268421	-0.123913832	2	NA
ENSDARG00000043089	zgc:136911	ENSDARG00000043089	21.50764587	39.78065225	25.5262257	20.72370554	0.000609472	0.001728179	0.003389921	X30 - X0_X3 - X0_X7 - X0	zgc:136911 [Source:ZFIN;Acc:ZDB-GENE-060623-19]	15	962213	975246	1	1	KNOWN	-0.317878616	1.120300265	-0.802421649	1	NA
ENSDARG00000043093	MPEG1 (1 of 3)	ENSDARG00000043093	41.6593965	10.99480154	23.67481549	24.74281006	0.003295884	0.000166799	0.000153756	X30 - X0_X3 - X0_X7 - X0	macrophage expressed 1 [Source:HGNC Symbol;Acc:29619]	8	19881017	19884779	1	1	KNOWN_BY_PROJECTION	0.50611731	-1.151882304	0.645764994	4	NA
ENSDARG00000043130	notch2	ENSDARG00000043130	634.7939921	1.474094271	3.66966593	3.398992579	0.043233377	1.86E-05	2.98E-05	X30 - X0_X3 - X0_X7 - X0	notch homolog 2 [Source:ZFIN;Acc:ZDB-GENE-000329-4]	8	20087003	20157810	1	4	KNOWN	0.686698021	-1.147298245	0.460600224	3	NA
ENSDARG00000043137	cdca8	ENSDARG00000043137	186.4969633	6.805222471	45.88956386	26.55271559	3.29E-06	9.99E-09	2.82E-08	X30 - X0_X3 - X0_X7 - X0	cell division cycle associated 8 [Source:ZFIN;Acc:ZDB-GENE-041114-171]	19	49493933	49504238	-1	3	KNOWN	0.996479456	-1.003483749	0.007004293	2	Yes
ENSDARG00000043148	slc1a3b	ENSDARG00000043148	159.4484888	11.74419299	152.6359353	110.6517354	0.001301404	3.56E-07	8.51E-07	X30 - X0_X3 - X0_X7 - X0	solute carrier family 1 (glial high affinity glutamate transporter), member 3b [Source:ZFIN;Acc:ZDB-GENE-090708-3]	10	37802885	37836567	-1	2	KNOWN	0.842703444	-1.105009662	0.262306218	3	NA
ENSDARG00000043220	kcnh5a	ENSDARG00000043220	47.63808412	-1.49281153	-2.102154224	-1.86727758	0.01957507	0.000615979	0.001827089	X30 - X0_X3 - X0_X7 - X0	potassium voltage-gated channel, subfamily H (eag-related), member 5a [Source:ZFIN;Acc:ZDB-GENE-061106-2]	20	20037014	20255031	-1	3	KNOWN	-0.915665279	1.06706808	-0.151402801	1	NA
ENSDARG00000043235	sox4b	ENSDARG00000043235	251.2946422	1.756897067	2.37104382	2.523850683	0.004823902	0.000276487	0.00016988	X30 - X0_X3 - X0_X7 - X0	SRY-box containing gene 4b [Source:ZFIN;Acc:ZDB-GENE-040426-1274]	16	20986	22432	1	1	KNOWN	0.378820474	-1.134064293	0.755243819	4	NA
ENSDARG00000043250	ppm1ab	ENSDARG00000043250	2353.347156	-1.247408476	-1.987387053	-1.713078631	0.0211049	1.43E-05	8.08E-05	X30 - X0_X3 - X0_X7 - X0	protein phosphatase, Mg2+/Mn2+ dependent, 1Ab [Source:ZFIN;Acc:ZDB-GENE-991102-14]	20	20673134	20683223	-1	1	KNOWN	-0.903780474	1.074293355	-0.17051288	1	NA
ENSDARG00000043276	calr	ENSDARG00000043276	1951.525222	1.472489644	4.409604997	2.360777052	0.012522578	1.30E-06	6.78E-05	X30 - X0_X3 - X0_X7 - X0	calreticulin [Source:ZFIN;Acc:ZDB-GENE-000208-17]	22	4339290	4410265	-1	3	KNOWN	1.103363085	-0.846541555	-0.25682153	2	NA
ENSDARG00000043285	zbtb21	ENSDARG00000043285	879.1878159	-1.236859633	-1.585339555	-1.450636763	0.033971108	0.00043471	0.001751275	X30 - X0_X3 - X0_X7 - X0	zinc finger and BTB domain containing 21 [Source:ZFIN;Acc:ZDB-GENE-050411-7]	10	33601185	33608064	1	2	KNOWN	-0.916530838	1.066523931	-0.149993092	1	NA
ENSDARG00000043403	si:dkey-7o6.3	ENSDARG00000043403	381.9296588	2.45703866	16.15855099	9.859504749	0.002798048	5.59E-07	2.61E-06	X30 - X0_X3 - X0_X7 - X0	si:dkey-7o6.3 [Source:ZFIN;Acc:ZDB-GENE-081104-436]	8	15756500	15767567	1	3	KNOWN	0.972105565	-1.025736095	0.053630531	2	NA
ENSDARG00000043416	tnfaip2a	ENSDARG00000043416	645.0679423	1.593314422	3.058320514	2.511559649	0.002146294	4.17E-06	1.87E-05	X30 - X0_X3 - X0_X7 - X0	tumor necrosis factor, alpha-induced protein 2a [Source:ZFIN;Acc:ZDB-GENE-041210-301]	20	18733784	18757512	1	2	KNOWN	0.905820322	-1.073085264	0.167264942	3	NA
ENSDARG00000043436	si:dkey-5n18.1	ENSDARG00000043436	343.7782268	14.13229391	85.39389443	49.16373682	6.93E-06	6.44E-08	1.92E-07	X30 - X0_X3 - X0_X7 - X0	si:dkey-5n18.1 [Source:ZFIN;Acc:ZDB-GENE-041014-144]	20	17080255	17082377	-1	1	KNOWN	1.005559688	-0.994345999	-0.011213689	2	NA
ENSDARG00000043453	rps5	ENSDARG00000043453	9315.749418	1.456528374	2.863914501	2.374036337	0.002796377	2.09E-06	9.12E-06	X30 - X0_X3 - X0_X7 - X0	ribosomal protein S5 [Source:ZFIN;Acc:ZDB-GENE-020419-12]	15	38602104	38608917	-1	2	KNOWN	0.885200229	-1.084718029	0.199517799	3	NA
ENSDARG00000043479	si:dkey-30h14.3	ENSDARG00000043479	22.73141913	-1.831679691	-3.334369201	-3.082880729	0.031005773	0.001544544	0.002115122	X30 - X0_X3 - X0_X7 - X0	si:dkey-30h14.3 [Source:ZFIN;Acc:ZDB-GENE-040724-51]	20	13669643	13680758	-1	2	KNOWN	-0.726491374	1.140521515	-0.41403014	1	NA
ENSDARG00000043509	rpl11	ENSDARG00000043509	7302.934422	1.543191176	3.222366459	2.525269324	0.004562892	4.60E-06	2.73E-05	X30 - X0_X3 - X0_X7 - X0	ribosomal protein L11 [Source:ZFIN;Acc:ZDB-GENE-040625-147]	19	45317840	45323807	1	1	KNOWN	0.938931781	-1.05153576	0.112603979	2	NA
ENSDARG00000043531	jun	ENSDARG00000043531	5005.701716	1.850473021	6.310226061	4.053421072	0.000203561	8.79E-08	5.70E-07	X30 - X0_X3 - X0_X7 - X0	jun proto-oncogene [Source:ZFIN;Acc:ZDB-GENE-030131-7859]	20	15558564	15560457	1	3	KNOWN	1.004001002	-0.995950388	-0.008050615	2	NA
ENSDARG00000043586	fas	ENSDARG00000043586	41.47730393	3.890908314	9.520857191	7.154363431	0.002455472	2.92E-05	0.000114477	X30 - X0_X3 - X0_X7 - X0	Fas (TNF receptor superfamily, member 6) [Source:ZFIN;Acc:ZDB-GENE-061019-2]	17	23449751	23461238	-1	2	KNOWN	0.942912907	-1.048679493	0.105766586	2	NA
ENSDARG00000043608	eif4ebp1	ENSDARG00000043608	707.4147437	1.525454272	3.09095168	2.738126395	0.004441786	4.64E-06	1.16E-05	X30 - X0_X3 - X0_X7 - X0	eukaryotic translation initiation factor 4E binding protein 1 [Source:ZFIN;Acc:ZDB-GENE-030131-2332]	21	19841022	19848583	-1	2	KNOWN	0.778702561	-1.127739215	0.349036654	3	NA
ENSDARG00000043640	cenpn	ENSDARG00000043640	65.27570626	2.916180528	19.72539117	10.48743192	0.002204396	1.76E-07	1.68E-06	X30 - X0_X3 - X0_X7 - X0	centromere protein N [Source:ZFIN;Acc:ZDB-GENE-030616-408]	18	29848444	29855499	1	1	KNOWN	1.03136287	-0.965367962	-0.065994909	2	NA
ENSDARG00000043705	mob3c	ENSDARG00000043705	30.63294395	2.681476636	5.681384577	5.226519766	0.004157637	3.67E-05	6.20E-05	X30 - X0_X3 - X0_X7 - X0	MOB kinase activator 3C [Source:ZFIN;Acc:ZDB-GENE-040704-32]	11	13345506	13359995	1	1	KNOWN	0.712280505	-1.143218623	0.430938118	3	NA
ENSDARG00000043716	cldn5a	ENSDARG00000043716	158.8640563	2.433614013	6.975134882	6.001791113	0.00499899	1.49E-05	3.42E-05	X30 - X0_X3 - X0_X7 - X0	claudin 5a [Source:ZFIN;Acc:ZDB-GENE-040426-2442]	8	4906305	4907811	1	1	KNOWN	0.768798326	-1.130530418	0.361732092	3	NA
ENSDARG00000043720	cdc45	ENSDARG00000043720	65.39193953	9.96936134	61.85064947	31.78890653	6.02E-05	8.68E-08	6.04E-07	X30 - X0_X3 - X0_X7 - X0	CDC45 cell division cycle 45 homolog (S. cerevisiae) [Source:ZFIN;Acc:ZDB-GENE-040426-2710]	8	4942546	4969264	-1	1	KNOWN	1.048554066	-0.943085793	-0.105468273	2	NA
ENSDARG00000043757	ptbp3	ENSDARG00000043757	1310.976437	1.20150051	1.257303791	1.360078957	0.046220557	0.01646953	0.00314511	X30 - X0_X3 - X0_X7 - X0	polypyrimidine tract binding protein 3 [Source:ZFIN;Acc:ZDB-GENE-091116-1]	10	11105114	11227461	-1	2	KNOWN	-0.194644877	-0.88836769	1.083012567	5	NA
ENSDARG00000043781	PSMB10	ENSDARG00000043781	380.6830393	2.009040208	3.691224126	2.800649886	0.000184332	1.75E-06	1.07E-05	X30 - X0_X3 - X0_X7 - X0	proteasome (prosome, macropain) subunit, beta type, 10 [Source:HGNC Symbol;Acc:9538]	4	61218243	61227140	-1	1	KNOWN_BY_PROJECTION	1.019022682	-0.97982462	-0.039198062	2	NA
ENSDARG00000043795	arhgdia	ENSDARG00000043795	2863.240273	1.335406622	3.630872647	2.500283121	0.03447079	2.06E-06	2.49E-05	X30 - X0_X3 - X0_X7 - X0	Rho GDP dissociation inhibitor (GDI) alpha [Source:ZFIN;Acc:ZDB-GENE-040426-2816]	3	60305892	60353645	1	1	KNOWN	0.994984061	-1.004941574	0.009957513	2	NA
ENSDARG00000043799	KLHL29 (2 of 2)	ENSDARG00000043799	25.41534988	-1.59361935	-3.062074506	-2.048870679	0.0065257	3.77E-05	0.000529023	X30 - X0_X3 - X0_X7 - X0	kelch-like family member 29 [Source:HGNC Symbol;Acc:29404]	17	4346595	4619797	1	1	KNOWN_BY_PROJECTION	-1.100484803	0.853062313	0.24742249	6	NA
ENSDARG00000043802	ms4a17a.9	ENSDARG00000043802	98.94095668	3.203299586	21.92193811	18.95856716	0.004266044	7.78E-07	1.20E-06	X30 - X0_X3 - X0_X7 - X0	membrane-spanning 4-domains, subfamily A, member 17A.9 [Source:ZFIN;Acc:ZDB-GENE-050320-79]	4	60650930	60674774	1	3	KNOWN	0.718319105	-1.142111178	0.423792073	3	NA
ENSDARG00000043851	CABZ01092943.1	ENSDARG00000043851	29.20084173	8.874254156	22.24154147	18.43571996	0.000114409	2.12E-06	4.50E-06	X30 - X0_X3 - X0_X7 - X0	Uncharacterized protein [Source:UniProtKB/TrEMBL;Acc:H9GXE9]	Zv9_NA135	25443	29694	-1	1	NOVEL	0.831176516	-1.109749046	0.27857253	3	NA
ENSDARG00000043899	psma6l	ENSDARG00000043899	133.91289	3.907141606	14.6133942	9.918802859	3.95E-05	1.21E-07	4.41E-07	X30 - X0_X3 - X0_X7 - X0	proteasome (prosome, macropain) subunit, alpha type, 6, like [Source:ZFIN;Acc:ZDB-GENE-010502-2]	15	46841716	46850422	1	1	KNOWN	0.95658402	-1.038390448	0.081806428	2	NA
ENSDARG00000043923	sox9b	ENSDARG00000043923	73.56510481	2.282816364	6.728980833	4.749575924	0.020048581	7.10E-05	0.000357781	X30 - X0_X3 - X0_X7 - X0	SRY-box containing gene 9b [Source:ZFIN;Acc:ZDB-GENE-001103-2]	3	63179328	63184452	-1	2	KNOWN	0.961539004	-1.034468028	0.072929024	2	NA
ENSDARG00000044001	lgals3l	ENSDARG00000044001	618.0275118	1.496379393	6.194872802	3.847060684	0.028048915	1.09E-06	1.09E-05	X30 - X0_X3 - X0_X7 - X0	lectin, galactoside-binding, soluble, 3 (galectin 3)-like [Source:ZFIN;Acc:ZDB-GENE-030131-4324]	17	10685537	10699306	-1	2	KNOWN	0.999796385	-1.000203491	0.000407105	2	NA
ENSDARG00000044010	loxl2a	ENSDARG00000044010	47.32204416	4.702535537	5.281794722	7.174964465	0.029153957	0.015602511	0.00741504	X30 - X0_X3 - X0_X7 - X0	lysyl oxidase-like 2a [Source:ZFIN;Acc:ZDB-GENE-070818-1]	10	20489093	20526754	-1	1	KNOWN	-0.33869967	-0.786663711	1.125363381	5	NA
ENSDARG00000044039	stx11a	ENSDARG00000044039	228.6536801	2.855826869	19.68776822	9.559331059	0.001623982	3.23E-07	3.71E-06	X30 - X0_X3 - X0_X7 - X0	syntaxin 11a [Source:ZFIN;Acc:ZDB-GENE-040426-2564]	17	7567512	7573085	-1	1	KNOWN	1.060532868	-0.925807238	-0.13472563	2	NA
ENSDARG00000044093	rpl13a	ENSDARG00000044093	12569.97374	1.417356439	2.711570103	2.103823268	0.005076148	3.56E-06	3.20E-05	X30 - X0_X3 - X0_X7 - X0	ribosomal protein L13a [Source:ZFIN;Acc:ZDB-GENE-030131-168]	17	24443248	24450993	1	7	KNOWN	0.979121597	-1.019646333	0.040524736	2	NA
ENSDARG00000044125	txn	ENSDARG00000044125	2052.491104	2.244821515	17.95167303	7.781287249	9.72E-05	1.82E-08	1.24E-07	X30 - X0_X3 - X0_X7 - X0	thioredoxin [Source:ZFIN;Acc:ZDB-GENE-040718-162]	7	25524322	25531917	-1	3	KNOWN	1.082747055	-0.88885606	-0.193890995	2	NA
ENSDARG00000044129	si:ch211-214p16.1	ENSDARG00000044129	78.6723124	6.35310887	5.765004825	11.57205301	0.001416056	0.00214806	0.000121071	X30 - X0_X3 - X0_X7 - X0	si:ch211-214p16.1 [Source:ZFIN;Acc:ZDB-GENE-030616-606]	17	25427177	25428548	-1	1	KNOWN	-0.666894478	-0.482909801	1.149804279	5	NA
ENSDARG00000044220	kars	ENSDARG00000044220	3353.10985	1.205545486	2.122502091	1.481143702	0.01859188	1.75E-06	0.000190472	X30 - X0_X3 - X0_X7 - X0	lysyl-tRNA synthetase [Source:ZFIN;Acc:ZDB-GENE-021115-8]	7	69483345	69502614	1	3	KNOWN	1.104062137	-0.844922002	-0.259140135	2	NA
ENSDARG00000044254	anxa3b	ENSDARG00000044254	1138.155956	3.787746349	6.231649605	7.222020322	3.42E-05	2.89E-06	1.78E-06	X30 - X0_X3 - X0_X7 - X0	annexin A3b [Source:ZFIN;Acc:ZDB-GENE-041114-128]	10	9338078	9360218	-1	4	KNOWN	0.27409728	-1.108466681	0.834369401	4	NA
ENSDARG00000044295	pip5k1ba	ENSDARG00000044295	2740.035266	-1.560986237	-3.492009198	-2.123663647	0.03870965	6.97E-05	0.001838001	X30 - X0_X3 - X0_X7 - X0	phosphatidylinositol-4-phosphate 5-kinase, type I, beta a [Source:ZFIN;Acc:ZDB-GENE-041010-81]	10	15909883	15948413	-1	2	KNOWN	-1.107399016	0.836984813	0.270414203	6	NA
ENSDARG00000044299	lmnb1	ENSDARG00000044299	1186.341996	1.33276916	2.849971304	2.205837296	0.002875912	3.16E-07	2.33E-06	X30 - X0_X3 - X0_X7 - X0	lamin B1 [Source:ZFIN;Acc:ZDB-GENE-020424-2]	10	16064820	16085482	1	5	KNOWN	0.946119068	-1.046334365	0.100215297	2	NA
ENSDARG00000044318	AL954698.1	ENSDARG00000044318	242.9405331	3.648384173	19.42384751	10.6939937	0.000539806	7.36E-07	4.43E-06	X30 - X0_X3 - X0_X7 - X0	Integrin beta [Source:UniProtKB/TrEMBL;Acc:E7F4H9]	6	39632406	39658106	-1	1	KNOWN	1.033626085	-0.962585224	-0.071040861	2	NA
ENSDARG00000044325	zgc:193690	ENSDARG00000044325	86.73180383	1.701695019	7.969847728	4.361757612	0.008142237	1.97E-07	3.33E-06	X30 - X0_X3 - X0_X7 - X0	zgc:193690 [Source:ZFIN;Acc:ZDB-GENE-080721-12]	23	37193902	37211540	-1	3	KNOWN	1.046433076	-0.945985226	-0.10044785	2	NA
ENSDARG00000044339	rp2	ENSDARG00000044339	2805.123744	-1.275405743	-1.877107428	-1.671852819	0.037259901	0.000139195	0.000560958	X30 - X0_X3 - X0_X7 - X0	retinitis pigmentosa 2 (X-linked recessive) [Source:ZFIN;Acc:ZDB-GENE-040426-2795]	6	37462947	37474227	-1	2	KNOWN	-0.87940633	1.087764412	-0.208358082	1	NA
ENSDARG00000044345	cyfip1	ENSDARG00000044345	1624.842998	1.235939094	2.272221682	1.696315511	0.013942012	1.56E-06	3.79E-05	X30 - X0_X3 - X0_X7 - X0	cytoplasmic FMR1 interacting protein 1 [Source:ZFIN;Acc:ZDB-GENE-030131-8557]	6	37603426	37679255	1	5	KNOWN	1.035019796	-0.96085008	-0.074169716	2	NA
ENSDARG00000044362	unc119b	ENSDARG00000044362	16852.04199	-1.236817673	-2.235830393	-2.02383238	0.040022936	9.16E-06	2.35E-05	X30 - X0_X3 - X0_X7 - X0	unc-119 homolog b (C. elegans) [Source:ZFIN;Acc:ZDB-GENE-050201-2]	21	37956316	38012427	-1	1	KNOWN	-0.766901519	1.131044597	-0.364143078	1	NA
ENSDARG00000044395	ZFP36	ENSDARG00000044395	1172.830176	2.00010496	2.81483459	2.603732246	0.027633136	0.002038223	0.003890057	X30 - X0_X3 - X0_X7 - X0	ZFP36 ring finger protein [Source:HGNC Symbol;Acc:12862]	Zv9_NA234	5622	7517	1	2	KNOWN_BY_PROJECTION	0.808702028	-1.118144242	0.309442214	3	NA
ENSDARG00000044402	nop16	ENSDARG00000044402	550.6488731	1.325856847	2.35188036	1.688152656	0.018905705	1.07E-05	0.000377578	X30 - X0_X3 - X0_X7 - X0	NOP16 nucleolar protein homolog (yeast) [Source:ZFIN;Acc:ZDB-GENE-040718-267]	21	35934011	35941233	-1	1	KNOWN	1.082467865	-0.889368232	-0.193099633	2	NA
ENSDARG00000044415	tlr5a	ENSDARG00000044415	40.44394945	2.435476758	8.93354089	5.087179643	0.02532252	2.24E-05	0.000395782	X30 - X0_X3 - X0_X7 - X0	toll-like receptor 5a [Source:ZFIN;Acc:ZDB-GENE-040219-14]	20	51816388	51820040	1	2	KNOWN	1.055354235	-0.933473346	-0.121880889	2	NA
ENSDARG00000044437	cdca5	ENSDARG00000044437	87.06162884	2.977726029	17.30663072	10.78714749	0.002578035	4.08E-07	2.23E-06	X30 - X0_X3 - X0_X7 - X0	cell division cycle associated 5 [Source:ZFIN;Acc:ZDB-GENE-030131-235]	5	70170756	70176273	-1	1	KNOWN	0.96868464	-1.028619411	0.059934771	2	NA
ENSDARG00000044490	tlr9	ENSDARG00000044490	5.076987727	4.844580845	3.427712701	11.75040477	0.000873434	0.003502673	3.15E-05	X30 - X0_X3 - X0_X7 - X0	toll-like receptor 9 [Source:ZFIN;Acc:ZDB-GENE-040219-10]	8	55862694	55867034	1	1	KNOWN	-0.729094612	-0.410898233	1.139992846	5	NA
ENSDARG00000044491	kif20a	ENSDARG00000044491	198.9846756	13.4863575	78.63421926	43.73419633	6.56E-07	8.34E-09	2.30E-08	X30 - X0_X3 - X0_X7 - X0	kinesin family member 20A [Source:ZFIN;Acc:ZDB-GENE-050522-252]	21	33845087	33892436	-1	2	KNOWN	1.022934196	-0.97536819	-0.047566005	2	Yes
ENSDARG00000044514	st6gal1	ENSDARG00000044514	2339.150685	-1.30642119	-2.334853993	-1.890116739	0.024279052	1.59E-05	0.000123538	X30 - X0_X3 - X0_X7 - X0	ST6 beta-galactosamide alpha-2,6-sialyltranferase 1 [Source:ZFIN;Acc:ZDB-GENE-060322-3]	21	29913492	29952761	1	4	KNOWN	-0.952068639	1.041873502	-0.089804863	1	NA
ENSDARG00000044521	eef1b2	ENSDARG00000044521	6721.877628	1.60612353	3.407536128	2.866980988	0.000387864	4.12E-07	1.26E-06	X30 - X0_X3 - X0_X7 - X0	eukaryotic translation elongation factor 1 beta 2 [Source:ZFIN;Acc:ZDB-GENE-030131-7310]	6	13110537	13116230	-1	6	KNOWN	0.844503698	-1.104241679	0.259737981	3	NA
ENSDARG00000044541	ppp1r14ba	ENSDARG00000044541	1312.061796	1.628535608	1.353224101	1.834651305	0.00033355	0.006792519	7.11E-05	X30 - X0_X3 - X0_X7 - X0	protein phosphatase 1, regulatory (inhibitor) subunit 14Ba [Source:ZFIN;Acc:ZDB-GENE-060825-331]	21	26390670	26405231	-1	4	KNOWN	-1.044320682	0.095492162	0.94882852	8	NA
ENSDARG00000044561	ccr7	ENSDARG00000044561	4.871460806	3.715032067	3.966848143	4.844854161	0.039949749	0.040625139	0.010917261	X30 - X0_X3 - X0_X7 - X0	chemokine (C-C motif) receptor 7 [Source:ZFIN;Acc:ZDB-GENE-060522-2]	6	10831647	10838713	-1	2	KNOWN	-0.351913978	-0.776470128	1.128384106	5	NA
ENSDARG00000044565	ola1	ENSDARG00000044565	3608.255885	1.231285677	2.184688318	1.767681973	0.010244365	1.27E-06	1.26E-05	X30 - X0_X3 - X0_X7 - X0	Obg-like ATPase 1 [Source:ZFIN;Acc:ZDB-GENE-030131-5063]	6	10652213	10664451	-1	2	KNOWN	0.955763612	-1.039029682	0.08326607	2	NA
ENSDARG00000044569	cldn19	ENSDARG00000044569	267.4211279	1.54362514	1.777649593	1.847692856	0.011100722	0.001932589	0.001409582	X30 - X0_X3 - X0_X7 - X0	claudin 19 [Source:ZFIN;Acc:ZDB-GENE-050417-242]	11	40247433	40278242	-1	1	KNOWN	0.343273282	-1.126425932	0.78315265	4	NA
ENSDARG00000044575	vars	ENSDARG00000044575	1247.987918	1.175598385	2.107248264	1.445187691	0.03166792	1.46E-06	0.00023445	X30 - X0_X3 - X0_X7 - X0	valyl-tRNA synthetase [Source:ZFIN;Acc:ZDB-GENE-010601-1]	16	12039364	12085104	1	2	KNOWN	1.108117307	-0.835229466	-0.27288784	2	NA
ENSDARG00000044612	c1qb	ENSDARG00000044612	446.1634609	5.87657993	34.68940564	21.3862051	7.55E-05	2.14E-07	6.94E-07	X30 - X0_X3 - X0_X7 - X0	complement component 1, q subcomponent, B chain [Source:ZFIN;Acc:ZDB-GENE-040801-223]	21	21827289	21830279	-1	1	KNOWN	0.973523026	-1.024525112	0.051002086	2	NA
ENSDARG00000044613	c1qa	ENSDARG00000044613	343.9025762	5.157471677	26.95969799	18.71201051	7.59E-05	2.01E-07	5.15E-07	X30 - X0_X3 - X0_X7 - X0	complement component 1, q subcomponent, A chain [Source:ZFIN;Acc:ZDB-GENE-050522-86]	21	21832811	21839962	-1	2	KNOWN	0.90992255	-1.070615979	0.16069343	3	NA
ENSDARG00000044622	POLQ	ENSDARG00000044622	34.67262841	4.685032167	11.77209176	7.799745555	0.000122755	1.28E-06	7.58E-06	X30 - X0_X3 - X0_X7 - X0	polymerase (DNA directed), theta [Source:HGNC Symbol;Acc:9186]	21	21966180	21986883	-1	1	KNOWN_BY_PROJECTION	1.037808048	-0.957328295	-0.080479752	2	NA
ENSDARG00000044676	GADD45G (3 of 3)	ENSDARG00000044676	4.673369913	2.957143804	6.853906151	8.882429696	0.002236054	0.000127522	4.60E-05	X30 - X0_X3 - X0_X7 - X0	growth arrest and DNA-damage-inducible, gamma [Source:HGNC Symbol;Acc:4097]	21	19537917	19539614	-1	1	KNOWN_BY_PROJECTION	0.206801019	-1.087232306	0.880431287	4	NA
ENSDARG00000044694	FYB (1 of 2)	ENSDARG00000044694	286.4593698	3.353045067	10.23421032	8.762310934	1.30E-05	8.62E-08	1.43E-07	X30 - X0_X3 - X0_X7 - X0	FYN binding protein [Source:HGNC Symbol;Acc:4036]	21	18672070	18694226	1	3	KNOWN_BY_PROJECTION	0.768422853	-1.130632715	0.362209861	3	NA
ENSDARG00000044752	p2rx4a	ENSDARG00000044752	26.41454433	7.855296821	37.77134622	26.71943094	0.001969345	2.83E-06	1.03E-05	X30 - X0_X3 - X0_X7 - X0	purinergic receptor P2X, ligand-gated ion channel, 4a [Source:ZFIN;Acc:ZDB-GENE-020806-2]	21	13926137	13935469	1	3	KNOWN	0.902751403	-1.074897897	0.172146495	3	NA
ENSDARG00000044755	GCNT4 (3 of 3)	ENSDARG00000044755	30.40457203	2.777525228	14.19706766	10.52169238	0.028327472	6.75E-06	2.82E-05	X30 - X0_X3 - X0_X7 - X0	glucosaminyl (N-acetyl) transferase 4, core 2 [Source:HGNC Symbol;Acc:17973]	21	14036290	14044235	1	3	KNOWN_BY_PROJECTION	0.863159252	-1.095821358	0.232662106	3	NA
ENSDARG00000044760	gnaia	ENSDARG00000044760	822.0697936	1.780206976	5.030493528	4.338688396	0.000624453	3.62E-07	7.63E-07	X30 - X0_X3 - X0_X7 - X0	guanine nucleotide binding protein (G protein), alpha inhibiting activity polypeptide a [Source:ZFIN;Acc:ZDB-GENE-030131-2229]	25	21668141	21701477	-1	2	KNOWN	0.767473133	-1.130890327	0.363417194	3	NA
ENSDARG00000044775	fut7	ENSDARG00000044775	71.63784067	4.327338149	28.81634894	18.97454792	0.003327315	1.36E-06	5.02E-06	X30 - X0_X3 - X0_X7 - X0	fucosyltransferase 7 (alpha (1,3) fucosyltransferase) [Source:ZFIN;Acc:ZDB-GENE-060929-997]	21	11878987	11883544	1	1	KNOWN	0.928650324	-1.058636892	0.129986568	3	NA
ENSDARG00000044807	dck	ENSDARG00000044807	87.48541372	2.015895952	11.21595137	5.933496421	0.007000943	2.51E-07	3.59E-06	X30 - X0_X3 - X0_X7 - X0	deoxycytidine kinase [Source:ZFIN;Acc:ZDB-GENE-041024-3]	21	5869308	5880890	-1	1	KNOWN	1.045622517	-0.947081412	-0.098541105	2	NA
ENSDARG00000044841	notch1a	ENSDARG00000044841	188.8653913	2.178374624	4.635668432	4.355917431	0.002911688	1.77E-05	2.43E-05	X30 - X0_X3 - X0_X7 - X0	notch homolog 1a [Source:ZFIN;Acc:ZDB-GENE-990415-173]	21	5057239	5083787	1	3	KNOWN	-0.107297232	-1.539671078	-0.270366059	9	NA
ENSDARG00000044938	cbx2	ENSDARG00000044938	109.4348809	2.112750404	2.648091751	3.179056569	0.000638335	8.00E-05	2.14E-05	X30 - X0_X3 - X0_X7 - X0	chromobox homolog 2 (Drosophila Pc class) [Source:ZFIN;Acc:ZDB-GENE-030131-5502]	3	10535521	10548180	1	1	KNOWN	0.002736248	-1.001365316	0.998629068	4	NA
ENSDARG00000044990	CD9	ENSDARG00000044990	296.5822979	5.296720914	3.685678001	7.821480749	0.009409753	0.03101951	0.001543878	X30 - X0_X3 - X0_X7 - X0	CD9 molecule [Source:HGNC Symbol;Acc:1709]	3	2122499	2124969	1	1	KNOWN_BY_PROJECTION	-0.918912047	-0.146101973	1.06501402	8	NA
ENSDARG00000045006	ptprga	ENSDARG00000045006	286.7378141	-1.451043298	-2.204825572	-1.610714203	0.011922089	0.000102282	0.002738483	X30 - X0_X3 - X0_X7 - X0	protein tyrosine phosphatase, receptor type, g a [Source:ZFIN;Acc:ZDB-GENE-101101-4]	11	5038317	5551068	1	2	KNOWN	-1.131136678	0.76655929	0.364577388	6	NA
ENSDARG00000045011	TAPBP (1 of 2)	ENSDARG00000045011	62.67622439	3.284260229	5.303459078	4.905817884	0.000281148	1.67E-05	2.60E-05	X30 - X0_X3 - X0_X7 - X0	TAP binding protein (tapasin) [Source:HGNC Symbol;Acc:11566]	19	7689030	7693227	-1	2	KNOWN_BY_PROJECTION	0.75316563	-1.134577637	0.381412007	3	NA
ENSDARG00000045033	bnip3	ENSDARG00000045033	1965.832104	-1.321337803	-2.000525407	-1.555649161	0.020557725	6.19E-05	0.0014734	X30 - X0_X3 - X0_X7 - X0	BCL2/adenovirus E1B interacting protein 3 [Source:ZFIN;Acc:ZDB-GENE-030131-8060]	12	43175668	43191180	-1	1	KNOWN	-1.086080553	0.882630874	0.20344968	6	NA
ENSDARG00000045066	entpd1	ENSDARG00000045066	692.744691	1.83458309	6.115158326	4.278264718	0.005947765	2.66E-06	1.43E-05	X30 - X0_X3 - X0_X7 - X0	ectonucleoside triphosphate diphosphohydrolase 1 [Source:ZFIN;Acc:ZDB-GENE-040801-58]	12	32404918	32441864	-1	3	KNOWN	0.949573877	-1.043761533	0.094187656	2	NA
ENSDARG00000045153	slc16a8	ENSDARG00000045153	587.3422882	2.329257001	5.146766312	2.884580894	0.008281009	8.37E-05	0.001523969	X30 - X0_X3 - X0_X7 - X0	solute carrier family 16, member 8 (monocarboxylic acid transporter 3) [Source:ZFIN;Acc:ZDB-GENE-121128-1]	12	20288069	20298871	1	2	KNOWN	1.134540686	-0.753316233	-0.381224453	2	NA
ENSDARG00000045155	phf5a	ENSDARG00000045155	160.2022255	1.397175386	2.478645566	1.638466808	0.009500482	1.01E-05	0.000862993	X30 - X0_X3 - X0_X7 - X0	PHD finger protein 5A [Source:ZFIN;Acc:ZDB-GENE-021219-3]	12	20234734	20239974	1	3	KNOWN	1.128324223	-0.776678782	-0.351645441	2	NA
ENSDARG00000045167	dlgap5	ENSDARG00000045167	207.2406198	11.68354646	50.88235645	33.72439471	1.38E-07	4.24E-09	9.58E-09	X30 - X0_X3 - X0_X7 - X0	discs, large (Drosophila) homolog-associated protein 5 [Source:ZFIN;Acc:ZDB-GENE-040912-160]	12	18700903	18723232	-1	2	KNOWN	0.956008389	-1.03883926	0.082830871	2	Yes
ENSDARG00000045190	ch25h	ENSDARG00000045190	73.49467846	3.881400266	7.550090524	5.669346167	0.001339905	4.75E-05	0.000201331	X30 - X0_X3 - X0_X7 - X0	cholesterol 25-hydroxylase [Source:ZFIN;Acc:ZDB-GENE-041212-81]	12	18109709	18110818	1	1	KNOWN	1.008324051	-0.991462709	-0.016861342	2	NA
ENSDARG00000045204	CACNA2D3 (2 of 2)	ENSDARG00000045204	196.5977125	-1.30580974	-2.69377247	-1.775597466	0.048200231	2.12E-05	0.00081788	X30 - X0_X3 - X0_X7 - X0	calcium channel, voltage-dependent, alpha 2/delta subunit 3 [Source:HGNC Symbol;Acc:15460]	8	55932338	56016475	-1	1	KNOWN_BY_PROJECTION	-1.08890623	0.877187869	0.211718361	6	NA
ENSDARG00000045279	rsu1	ENSDARG00000045279	588.6720973	1.563951002	5.481432094	3.796187415	0.008081432	6.21E-07	3.78E-06	X30 - X0_X3 - X0_X7 - X0	Ras suppressor protein 1 [Source:ZFIN;Acc:ZDB-GENE-030616-518]	24	33153256	33231007	-1	3	KNOWN	0.950374093	-1.043158712	0.092784618	2	NA
ENSDARG00000045306	slc51a	ENSDARG00000045306	128.6589726	1.627906858	3.914834866	2.846847101	0.004776096	2.39E-06	2.08E-05	X30 - X0_X3 - X0_X7 - X0	solute carrier family 51, alpha subunit [Source:ZFIN;Acc:ZDB-GENE-040912-10]	24	25569847	25590995	-1	2	KNOWN	0.977288383	-1.021260904	0.043972521	2	NA
ENSDARG00000045352	zgc:56530	ENSDARG00000045352	381.5016764	1.375951125	3.511168314	2.901495711	0.029074576	3.34E-06	1.20E-05	X30 - X0_X3 - X0_X7 - X0	zgc:56530 [Source:ZFIN;Acc:ZDB-GENE-040426-1065]	24	21529015	21530166	1	1	KNOWN	0.831891391	-1.109463926	0.277572535	3	NA
ENSDARG00000045391	cd226	ENSDARG00000045391	266.4739229	1.559158389	2.818048607	2.285206625	0.03161714	0.000130751	0.000761798	X30 - X0_X3 - X0_X7 - X0	CD226 molecule [Source:ZFIN;Acc:ZDB-GENE-070112-1322]	24	15018348	15035964	-1	1	KNOWN	0.945139112	-1.047055452	0.10191634	2	NA
ENSDARG00000045399	cct5	ENSDARG00000045399	5552.452948	1.176675602	2.097328942	1.545882993	0.047302206	3.42E-06	0.000160687	X30 - X0_X3 - X0_X7 - X0	chaperonin containing TCP1, subunit 5 (epsilon) [Source:ZFIN;Acc:ZDB-GENE-030131-977]	24	17454293	17462002	1	1	KNOWN	1.059087819	-0.927978024	-0.131109796	2	NA
ENSDARG00000045411	acad11	ENSDARG00000045411	121.6718089	1.478059078	5.366214367	2.849128329	0.026324706	7.14E-07	3.25E-05	X30 - X0_X3 - X0_X7 - X0	acyl-Coenzyme A dehydrogenase family, member 11 [Source:ZFIN;Acc:ZDB-GENE-040426-814]	24	11122560	11218396	-1	2	KNOWN	1.082684059	-0.888971747	-0.193712312	2	NA
ENSDARG00000045486	pawr	ENSDARG00000045486	373.129942	1.475201687	2.942059207	2.241641266	0.010302231	8.90E-06	8.18E-05	X30 - X0_X3 - X0_X7 - X0	PRKC, apoptosis, WT1, regulator [Source:ZFIN;Acc:ZDB-GENE-041010-108]	4	20258696	20402515	-1	2	KNOWN	0.984664635	-1.01466044	0.029995805	2	NA
ENSDARG00000045487	rps16	ENSDARG00000045487	6308.634144	1.465442981	2.945367865	2.384730473	0.006852041	5.14E-06	2.70E-05	X30 - X0_X3 - X0_X7 - X0	ribosomal protein S16 [Source:ZFIN;Acc:ZDB-GENE-050506-107]	4	20584700	20588333	-1	2	KNOWN	0.910351167	-1.070354878	0.160003711	3	NA
ENSDARG00000045518	tmem110l	ENSDARG00000045518	694.7850063	-1.329196356	-2.450502529	-1.978441686	0.024798064	1.73E-05	0.000116396	X30 - X0_X3 - X0_X7 - X0	transmembrane protein 110, like [Source:ZFIN;Acc:ZDB-GENE-040426-912]	4	24336375	24358588	-1	4	KNOWN	-0.943410067	1.048318495	-0.104908428	1	NA
ENSDARG00000045524	lamb1b	ENSDARG00000045524	337.9576135	1.698979897	2.78638103	4.281360728	0.043118289	0.000570654	4.73E-05	X30 - X0_X3 - X0_X7 - X0	laminin, beta 1b [Source:ZFIN;Acc:ZDB-GENE-041210-197]	4	24791729	24839513	1	2	KNOWN	-0.104786215	-0.943480824	1.048267039	5	NA
ENSDARG00000045530	si:ch211-244b2.4	ENSDARG00000045530	97.22218998	4.4093155	10.22228072	8.86937129	0.000912744	1.58E-05	3.22E-05	X30 - X0_X3 - X0_X7 - X0	si:ch211-244b2.4 [Source:ZFIN;Acc:ZDB-GENE-030131-8699]	4	25183514	25195186	-1	1	KNOWN	0.785282874	-1.12578406	0.340501187	3	NA
ENSDARG00000045548	lepb	ENSDARG00000045548	737.882624	21.96289227	88.39851856	44.01383197	2.30E-06	1.02E-07	3.89E-07	X30 - X0_X3 - X0_X7 - X0	leptin b [Source:ZFIN;Acc:ZDB-GENE-041210-183]	4	18099952	18102016	-1	2	KNOWN	1.091685073	-0.871676507	-0.220008566	2	Yes
ENSDARG00000045554	SNX20	ENSDARG00000045554	22.10322458	4.777309814	15.44219456	8.759803916	0.015740021	6.65E-05	0.000931729	X30 - X0_X3 - X0_X7 - X0	sorting nexin 20 [Source:HGNC Symbol;Acc:30390]	25	37040009	37047674	-1	1	KNOWN_BY_PROJECTION	1.072985378	-0.905987999	-0.166997378	2	NA
ENSDARG00000045561	dram1	ENSDARG00000045561	180.5865513	13.15899573	81.87709039	65.05345337	0.000123709	4.56E-07	8.11E-07	X30 - X0_X3 - X0_X7 - X0	DNA-damage regulated autophagy modulator 1 [Source:ZFIN;Acc:ZDB-GENE-041010-147]	4	16730597	16738065	-1	1	KNOWN	0.796042976	-1.122408598	0.326365622	3	NA
ENSDARG00000045568	bcat1	ENSDARG00000045568	2393.416975	-1.217238145	-1.900277633	-1.672294034	0.032911867	2.03E-05	9.90E-05	X30 - X0_X3 - X0_X7 - X0	branched chain aminotransferase 1, cytosolic [Source:ZFIN;Acc:ZDB-GENE-030131-9358]	4	16348150	16365604	1	5	KNOWN	-0.87324582	1.090902135	-0.217656315	1	NA
ENSDARG00000045586	zgc:172145	ENSDARG00000045586	29.72809282	2.398822821	7.000282284	4.978571222	0.045773779	0.000135433	0.000851801	X30 - X0_X3 - X0_X7 - X0	zgc:172145 [Source:ZFIN;Acc:ZDB-GENE-080516-9]	25	32268122	32276783	-1	1	KNOWN	0.957231811	-1.037883681	0.080651871	2	NA
ENSDARG00000045605	ticrr	ENSDARG00000045605	126.7193168	2.431007838	10.19075799	7.703716422	0.002593205	7.97E-07	2.31E-06	X30 - X0_X3 - X0_X7 - X0	TopBP1-interacting, checkpoint, and replication regulator [Source:ZFIN;Acc:ZDB-GENE-040728-1]	25	31306471	31327621	1	1	KNOWN	0.862016444	-1.096362066	0.234345622	3	NA
ENSDARG00000045628	rab34a	ENSDARG00000045628	591.0211205	2.476949772	8.706500281	6.689075873	0.000111771	1.72E-07	4.25E-07	X30 - X0_X3 - X0_X7 - X0	RAB34, member RAS oncogene family a [Source:ZFIN;Acc:ZDB-GENE-041010-197]	15	14478989	14488111	-1	3	KNOWN	0.864855517	-1.095012622	0.230157104	3	NA
ENSDARG00000045661	irf7	ENSDARG00000045661	144.3471251	4.175380832	2.597059312	5.043523357	0.004714983	0.037078767	0.002070926	X30 - X0_X3 - X0_X7 - X0	interferon regulatory factor 7 [Source:ZFIN;Acc:ZDB-GENE-040426-1518]	25	26412229	26416395	-1	4	KNOWN	-1.081676235	0.190863272	0.890812963	8	NA
ENSDARG00000045676	calua	ENSDARG00000045676	828.2435983	1.296454508	2.780783968	2.042787371	0.048887719	1.18E-05	0.000159082	X30 - X0_X3 - X0_X7 - X0	calumenin a [Source:ZFIN;Acc:ZDB-GENE-040625-166]	4	12633050	12640739	1	2	KNOWN	0.998122692	-1.001866794	0.003744102	2	NA
ENSDARG00000045681	irf5	ENSDARG00000045681	82.85605537	2.760286844	9.561758823	7.958486573	0.000532297	5.45E-07	1.21E-06	X30 - X0_X3 - X0_X7 - X0	interferon regulatory factor 5 [Source:ZFIN;Acc:ZDB-GENE-040426-2587]	4	12670131	12679345	-1	4	KNOWN	0.787945127	-1.12496973	0.337024603	3	NA
ENSDARG00000045758	efcab4bb	ENSDARG00000045758	28.20510016	7.659392258	12.70526287	20.98728308	0.001582878	0.000138127	1.97E-05	X30 - X0_X3 - X0_X7 - X0	EF-hand calcium binding domain 4Bb [Source:ZFIN;Acc:ZDB-GENE-041210-94]	4	10199572	10213335	1	3	KNOWN	-0.160306029	-0.910163341	1.070469369	5	NA
ENSDARG00000045788	avpr1b	ENSDARG00000045788	197.3454515	2.696521534	2.475245518	3.680816443	8.24E-05	0.000163064	1.02E-05	X30 - X0_X3 - X0_X7 - X0	arginine vasopressin receptor 1B [Source:ZFIN;Acc:ZDB-GENE-041210-105]	4	8279298	8285864	-1	1	KNOWN	-0.741101583	-0.39631056	1.137412143	5	NA
ENSDARG00000045815	mcm10	ENSDARG00000045815	49.1869274	6.647344626	50.49547456	23.22143343	0.001193124	6.75E-07	7.79E-06	X30 - X0_X3 - X0_X7 - X0	minichromosome maintenance complex component 10 [Source:ZFIN;Acc:ZDB-GENE-041210-42]	4	7031281	7049883	-1	1	KNOWN	1.070766356	-0.909675254	-0.161091103	2	NA
ENSDARG00000045836	mapk11	ENSDARG00000045836	203.3484167	1.484220238	2.551523716	2.88244716	0.007462057	1.72E-05	6.68E-06	X30 - X0_X3 - X0_X7 - X0	mitogen-activated protein kinase 11 [Source:ZFIN;Acc:ZDB-GENE-040625-75]	4	5380195	5395686	1	4	KNOWN	0.335916574	-1.124708015	0.78879144	4	NA
ENSDARG00000045843	apex1	ENSDARG00000045843	1339.444297	1.492650652	2.079574809	2.094628917	0.001852116	2.77E-05	2.63E-05	X30 - X0_X3 - X0_X7 - X0	APEX nuclease (multifunctional DNA repair enzyme) 1 [Source:ZFIN;Acc:ZDB-GENE-040426-2761]	4	5207237	5213106	1	7	KNOWN	0.555285185	-1.154422937	0.599137752	4	NA
ENSDARG00000045853	rad51ap1	ENSDARG00000045853	37.90681804	3.468485433	9.117639262	6.405413451	0.001029438	5.36E-06	2.82E-05	X30 - X0_X3 - X0_X7 - X0	RAD51 associated protein 1 [Source:ZFIN;Acc:ZDB-GENE-050419-96]	4	5069718	5076592	1	1	KNOWN	0.986481154	-1.012991671	0.026510516	2	NA
ENSDARG00000045921	PARP12	ENSDARG00000045921	306.3573023	2.918828358	4.43961566	5.336330843	0.000948862	6.85E-05	2.94E-05	X30 - X0_X3 - X0_X7 - X0	poly (ADP-ribose) polymerase family, member 12 [Source:HGNC Symbol;Acc:21919]	19	46825378	46839228	1	1	KNOWN_BY_PROJECTION	0.170218129	-1.074184058	0.903965928	4	NA
ENSDARG00000045926	crabp1a	ENSDARG00000045926	1482.294517	1.709130791	2.177186686	2.139142677	0.000276899	1.86E-05	2.15E-05	X30 - X0_X3 - X0_X7 - X0	cellular retinoic acid binding protein 1a [Source:ZFIN;Acc:ZDB-GENE-020320-3]	25	6660041	6690536	1	2	KNOWN	0.648978937	-1.15160479	0.502625853	3	NA
ENSDARG00000045956	kcnk10b	ENSDARG00000045956	14.96976599	7.078279247	25.57825567	26.65202386	0.004876954	5.20E-05	5.32E-05	X30 - X0_X3 - X0_X7 - X0	potassium channel, subfamily K, member 10b [Source:ZFIN;Acc:ZDB-GENE-050420-31]	17	2512300	2543921	1	1	KNOWN	0.527872968	-1.153325374	0.625452406	4	NA
ENSDARG00000045957	gpr65	ENSDARG00000045957	13.3112667	4.419713243	15.00253803	13.65781589	0.024801328	0.0001653	0.000265188	X30 - X0_X3 - X0_X7 - X0	G protein-coupled receptor 65 [Source:ZFIN;Acc:ZDB-GENE-120709-81]	17	2588745	2595004	-1	2	KNOWN	0.690110478	-1.146809968	0.45669949	3	NA
ENSDARG00000045959	csf3r	ENSDARG00000045959	131.4350063	2.435892669	6.54946898	5.721606929	0.000453428	1.11E-06	2.23E-06	X30 - X0_X3 - X0_X7 - X0	colony stimulating factor 3 receptor (granulocyte) [Source:ZFIN;Acc:ZDB-GENE-080104-4]	16	4049463	4072378	-1	1	KNOWN	0.757054767	-1.133610862	0.376556095	3	NA
ENSDARG00000045979	PTGDS (3 of 3)	ENSDARG00000045979	1293.281632	-1.334890028	-2.379248793	-2.329477953	0.024240498	2.13E-05	2.75E-05	X30 - X0_X3 - X0_X7 - X0	prostaglandin D2 synthase 21kDa (brain) [Source:HGNC Symbol;Acc:9592]	5	4406639	4417553	-1	1	KNOWN_BY_PROJECTION	-0.619076688	1.153669874	-0.534593186	1	NA
ENSDARG00000045980	zgc:153129	ENSDARG00000045980	377.5221297	1.757067776	8.446421381	4.627717792	0.015400689	1.07E-06	1.43E-05	X30 - X0_X3 - X0_X7 - X0	zgc:153129 [Source:ZFIN;Acc:ZDB-GENE-061013-189]	5	4447662	4456545	-1	1	KNOWN	1.043753571	-0.949584469	-0.094169101	2	NA
ENSDARG00000045999	saa	ENSDARG00000045999	3.99414345	3.662883747	5.892072275	5.7150234	0.020618102	0.004074513	0.004270452	X30 - X0_X3 - X0_X7 - X0	serum amyloid A [Source:ZFIN;Acc:ZDB-GENE-040927-15]	7	13776635	13782564	1	1	KNOWN	0.64731865	-1.151749854	0.504431204	3	NA
ENSDARG00000046019	snai1b	ENSDARG00000046019	3.844013745	3.266680366	7.669564308	4.439810305	0.001755505	8.54E-05	0.000564629	X30 - X0_X3 - X0_X7 - X0	snail homolog 1b (Drosophila) [Source:ZFIN;Acc:ZDB-GENE-980526-514]	23	2520268	2527047	-1	2	KNOWN	1.115837454	-0.815173624	-0.30066383	2	NA
ENSDARG00000046021	PI16	ENSDARG00000046021	11.26189742	7.571338073	14.91867267	19.01206326	0.021561749	0.002718728	0.00159199	X30 - X0_X3 - X0_X7 - X0	peptidase inhibitor 16 [Source:HGNC Symbol;Acc:21245]	23	41945385	41963203	1	1	KNOWN_BY_PROJECTION	0.187105931	-1.080337404	0.893231473	4	NA
ENSDARG00000046030	zgc:110339	ENSDARG00000046030	1006.246958	1.403342793	2.382257131	1.831247466	0.027544546	7.95E-05	0.00106697	X30 - X0_X3 - X0_X7 - X0	zgc:110339 [Source:ZFIN;Acc:ZDB-GENE-050417-323]	25	10758371	10764828	1	1	KNOWN	1.039183417	-0.955565756	-0.083617661	2	NA
ENSDARG00000046071	C21H18orf25	ENSDARG00000046071	230.2728546	-1.25438699	-1.300031625	-1.30219282	0.038827608	0.020608696	0.017860069	X30 - X0_X3 - X0_X7 - X0	chromosome 18 open reading frame 25 [Source:HGNC Symbol;Acc:28172]	21	5262340	5305753	-1	4	KNOWN_BY_PROJECTION	-0.536863226	1.153775279	-0.616912053	1	NA
ENSDARG00000046081	zgc:111974	ENSDARG00000046081	367.8297822	1.215295944	2.053975396	1.394271529	0.045695224	1.20E-05	0.00282954	X30 - X0_X3 - X0_X7 - X0	zgc:111974 [Source:ZFIN;Acc:ZDB-GENE-050809-129]	20	7762067	7770962	1	4	KNOWN	1.13075486	-0.767973298	-0.362781562	2	NA
ENSDARG00000046119	rps3	ENSDARG00000046119	11212.11045	1.450337372	2.614135897	2.225598238	0.007091893	1.11E-05	4.46E-05	X30 - X0_X3 - X0_X7 - X0	ribosomal protein S3 [Source:ZFIN;Acc:ZDB-GENE-030131-8494]	18	47351163	47362807	-1	2	KNOWN	0.873308887	-1.090870532	0.217561645	3	NA
ENSDARG00000046124	rab11fip1a	ENSDARG00000046124	75.9085417	1.618910983	2.077211225	2.062106537	0.004455875	0.000237829	0.000280149	X30 - X0_X3 - X0_X7 - X0	RAB11 family interacting protein 1 (class I) a [Source:ZFIN;Acc:ZDB-GENE-051113-116]	8	39099092	39114244	-1	2	NOVEL	0.60611584	-1.154214599	0.548098759	4	NA
ENSDARG00000046143	prkab1b	ENSDARG00000046143	438.0351111	1.39020261	3.642084033	2.447156781	0.021304506	1.98E-06	3.31E-05	X30 - X0_X3 - X0_X7 - X0	protein kinase, AMP-activated, beta 1 non-catalytic subunit, b [Source:ZFIN;Acc:ZDB-GENE-030131-7172]	8	41627353	41656382	1	3	KNOWN	1.019785527	-0.978964303	-0.040821225	2	NA
ENSDARG00000046148	tnfaip8l2b	ENSDARG00000046148	47.86700468	2.643379458	18.14326165	10.67513127	0.011873509	6.07E-07	4.73E-06	X30 - X0_X3 - X0_X7 - X0	tumor necrosis factor, alpha-induced protein 8, like 2b [Source:ZFIN;Acc:ZDB-GENE-040426-1359]	16	31944579	31959803	-1	2	KNOWN	0.987661383	-1.011898008	0.024236626	2	NA
ENSDARG00000046157	RPS17	ENSDARG00000046157	5601.471698	1.398095921	2.562246113	2.075940619	0.006187632	5.19E-06	3.49E-05	X30 - X0_X3 - X0_X7 - X0	ribosomal protein S17 [Source:HGNC Symbol;Acc:10397]	25	244029	248858	1	1	KNOWN_BY_PROJECTION	0.940920541	-1.050116549	0.109196008	2	NA
ENSDARG00000051729	nfatc3b	ENSDARG00000051729	99.05328785	1.640031	2.3501397	2.321940179	0.020344989	0.000595215	0.000670164	X30 - X0_X3 - X0_X7 - X0	nuclear factor of activated T-cells, cytoplasmic, calcineurin-dependent 3b [Source:ZFIN;Acc:ZDB-GENE-100922-25]	25	37256071	37284688	-1	1	KNOWN	0.612061525	-1.153990383	0.541928857	4	NA
ENSDARG00000051731	C25H19orf40	ENSDARG00000051731	9.562849189	5.28961532	22.17096657	10.79081486	0.001076256	6.78E-06	7.70E-05	X30 - X0_X3 - X0_X7 - X0	chromosome 19 open reading frame 40 [Source:HGNC Symbol;Acc:28467]	25	37324380	37328981	-1	2	KNOWN_BY_PROJECTION	1.094185925	-0.866573589	-0.227612336	2	NA
ENSDARG00000051783	rplp0	ENSDARG00000051783	27824.42212	1.541714522	3.585272154	2.601670605	0.008191735	4.78E-06	4.14E-05	X30 - X0_X3 - X0_X7 - X0	ribosomal protein, large, P0 [Source:ZFIN;Acc:ZDB-GENE-000629-1]	5	2059988	2072826	-1	2	KNOWN	0.987315795	-1.012219023	0.024903229	2	NA
ENSDARG00000051854	cdt1	ENSDARG00000051854	63.28370043	2.858871449	11.48392843	7.938843758	0.000142167	8.53E-08	3.44E-07	X30 - X0_X3 - X0_X7 - X0	chromatin licensing and DNA replication factor 1 [Source:ZFIN;Acc:ZDB-GENE-070111-1]	7	56781782	56793875	1	2	KNOWN	0.935755016	-1.053771622	0.118016605	2	NA
ENSDARG00000051857	tes	ENSDARG00000051857	447.870458	2.319029383	10.92145592	7.33835504	0.003419197	1.79E-06	7.64E-06	X30 - X0_X3 - X0_X7 - X0	testis derived transcript (3 LIM domains) [Source:ZFIN;Acc:ZDB-GENE-040718-59]	25	18962322	18983700	1	3	KNOWN	0.93999125	-1.05078159	0.11079034	2	NA
ENSDARG00000051875	islr2	ENSDARG00000051875	6561.365021	1.398260159	1.442298157	1.789411458	0.012871884	0.007552383	0.000407469	X30 - X0_X3 - X0_X7 - X0	immunoglobulin superfamily containing leucine-rich repeat 2 [Source:ZFIN;Acc:ZDB-GENE-050320-95]	25	23358505	23362472	-1	1	KNOWN	-0.471522252	-0.677064199	1.148586451	5	NA
ENSDARG00000051913	ddr2a	ENSDARG00000051913	221.9117097	1.645633108	2.434305002	2.644877586	0.01675812	0.000408294	0.00023244	X30 - X0_X3 - X0_X7 - X0	discoidin domain receptor tyrosine kinase 2a [Source:ZFIN;Acc:ZDB-GENE-090316-2]	6	34714078	34786845	1	2	KNOWN	0.365823325	-1.131399918	0.765576593	4	NA
ENSDARG00000051923	ccnb1	ENSDARG00000051923	376.1715647	5.083197039	33.58848224	15.57761039	1.38E-07	1.51E-09	4.42E-09	X30 - X0_X3 - X0_X7 - X0	cyclin B1 [Source:ZFIN;Acc:ZDB-GENE-000406-10]	5	55149484	55153246	-1	5	KNOWN	1.075503492	-0.901714902	-0.17378859	2	Yes
ENSDARG00000051935	dok1b	ENSDARG00000051935	104.0092033	1.672001162	4.422879229	3.321771267	0.012834807	5.91E-06	3.15E-05	X30 - X0_X3 - X0_X7 - X0	docking protein 1b [Source:ZFIN;Acc:ZDB-GENE-040426-2063]	7	65728496	65761780	1	1	KNOWN	0.927388354	-1.059482001	0.132093647	3	NA
ENSDARG00000051954	CU459094.1	ENSDARG00000051954	46.627788	2.155935684	4.153004893	4.411683039	0.02468807	0.000220213	0.000159865	X30 - X0_X3 - X0_X7 - X0	Uncharacterized protein [Source:UniProtKB/TrEMBL;Acc:F1QYY3]	11	43800837	43810687	-1	1	KNOWN	0.469400273	-1.148345329	0.678945056	4	NA
ENSDARG00000051962	MMP15 (2 of 2)	ENSDARG00000051962	692.1694017	2.072793848	3.357081787	5.348431446	0.00590787	0.000144131	1.43E-05	X30 - X0_X3 - X0_X7 - X0	matrix metallopeptidase 15 (membrane-inserted) [Source:HGNC Symbol;Acc:7161]	25	17915786	17938978	-1	1	KNOWN_BY_PROJECTION	-0.142798488	-0.920924516	1.063723004	5	NA
ENSDARG00000051975	cd99	ENSDARG00000051975	1246.739341	1.564259915	4.395603926	3.326959835	0.003284464	7.01E-07	3.31E-06	X30 - X0_X3 - X0_X7 - X0	CD99 molecule [Source:ZFIN;Acc:ZDB-GENE-061103-391]	1	33020650	33045276	-1	7	KNOWN	0.909228201	-1.071037704	0.161809502	3	NA
ENSDARG00000052000	cav2	ENSDARG00000052000	227.3086167	-1.275520322	-1.890960921	-1.522486469	0.045652118	0.000183626	0.00276388	X30 - X0_X3 - X0_X7 - X0	caveolin 2 [Source:ZFIN;Acc:ZDB-GENE-040625-164]	25	19043878	19049085	1	1	KNOWN	-1.058953581	0.928178414	0.130775167	6	NA
ENSDARG00000052030	akr1a1b	ENSDARG00000052030	431.515782	1.452728577	3.346240242	2.390342785	0.004096987	9.45E-07	1.09E-05	X30 - X0_X3 - X0_X7 - X0	aldo-keto reductase family 1, member A1b (aldehyde reductase) [Source:ZFIN;Acc:ZDB-GENE-050417-118]	6	33616458	33623077	-1	8	KNOWN	1.00320299	-0.996765933	-0.006437057	2	NA
ENSDARG00000052039	caspb	ENSDARG00000052039	21.7189031	15.67891779	34.08694024	36.2397165	0.001075393	6.14E-05	5.08E-05	X30 - X0_X3 - X0_X7 - X0	caspase b [Source:ZFIN;Acc:ZDB-GENE-020812-1]	1	58737275	58751108	-1	1	KNOWN	0.479475692	-1.1494506	0.669974908	4	NA
ENSDARG00000052057	PCOLCE (2 of 2)	ENSDARG00000052057	86.25026622	1.966067236	3.578022653	2.353302204	0.018391492	0.000305353	0.004833146	X30 - X0_X3 - X0_X7 - X0	procollagen C-endopeptidase enhancer [Source:HGNC Symbol;Acc:8738]	7	52304510	52328682	1	1	KNOWN_BY_PROJECTION	1.123716963	-0.791956591	-0.331760372	2	NA
ENSDARG00000052063	col4a5	ENSDARG00000052063	383.2549194	1.808640418	2.358362673	3.27766478	0.017440591	0.001409328	0.000152161	X30 - X0_X3 - X0_X7 - X0	collagen, type IV, alpha 5 (Alport syndrome) [Source:ZFIN;Acc:ZDB-GENE-030131-2281]	7	52558412	52649610	1	2	KNOWN	-0.165979464	-0.906625402	1.072604866	5	NA
ENSDARG00000052074	BX957362.1	ENSDARG00000052074	289.8738192	1.639826733	7.453799387	4.103334284	0.017845571	1.00E-06	1.59E-05	X30 - X0_X3 - X0_X7 - X0	Uncharacterized protein [Source:UniProtKB/TrEMBL;Acc:F1QYP6]	7	53271586	53280247	1	1	KNOWN	1.046799481	-0.945487569	-0.101311911	2	NA
ENSDARG00000052091	rbpjb	ENSDARG00000052091	170.7654453	1.59679918	1.431228143	2.208943963	0.000764136	0.00438065	1.61E-05	X30 - X0_X3 - X0_X7 - X0	recombination signal binding protein for immunoglobulin kappa J region b [Source:ZFIN;Acc:ZDB-GENE-070319-1]	7	62723096	62849573	1	1	KNOWN	-0.7675177	-0.363360575	1.130878275	5	NA
ENSDARG00000052103	dtymk	ENSDARG00000052103	103.3696746	1.718782187	8.73336412	4.360753849	0.004734366	9.62E-08	2.10E-06	X30 - X0_X3 - X0_X7 - X0	deoxythymidylate kinase (thymidylate kinase) [Source:ZFIN;Acc:ZDB-GENE-990603-11]	6	26813190	26817072	-1	1	KNOWN	1.071424878	-0.908588489	-0.162836389	2	NA
ENSDARG00000052157	il12rb2	ENSDARG00000052157	12.86113585	4.573940386	10.32773037	10.38197059	0.00639746	8.66E-05	8.31E-05	X30 - X0_X3 - X0_X7 - X0	interleukin 12 receptor, beta 2a [Source:ZFIN;Acc:ZDB-GENE-080107-3]	6	34899221	34916314	-1	2	KNOWN	0.569205871	-1.15466242	0.58545655	4	NA
ENSDARG00000052167	shcbp1	ENSDARG00000052167	156.9671351	2.620788249	14.48601111	5.829771374	0.00031196	7.06E-08	1.98E-06	X30 - X0_X3 - X0_X7 - X0	SHC SH2-domain binding protein 1 [Source:ZFIN;Acc:ZDB-GENE-030131-5865]	7	42231105	42254717	-1	2	KNOWN	1.114544318	-0.818697525	-0.295846793	2	NA
ENSDARG00000052178	eif2s1b	ENSDARG00000052178	1445.572708	1.334902593	2.186677684	1.826736137	0.013373475	1.83E-05	0.000123431	X30 - X0_X3 - X0_X7 - X0	eukaryotic translation initiation factor 2, subunit 1 alpha b [Source:ZFIN;Acc:ZDB-GENE-030131-283]	20	51439078	51457976	1	1	KNOWN	0.944618166	-1.047437234	0.102819069	2	NA
ENSDARG00000052307	lmbrd1	ENSDARG00000052307	6841.126246	-1.232602959	-1.761910703	-1.770593677	0.031893491	6.77E-05	6.45E-05	X30 - X0_X3 - X0_X7 - X0	LMBR1 domain containing 1 [Source:ZFIN;Acc:ZDB-GENE-041212-36]	13	39018815	39348514	-1	5	KNOWN	-0.563203311	1.154585918	-0.591382607	1	NA
ENSDARG00000052332	si:dkey-117k10.8	ENSDARG00000052332	9.498798512	3.719011071	4.341348038	5.886203825	0.005488695	0.002372217	0.000508683	X30 - X0_X3 - X0_X7 - X0	si:dkey-117k10.8 [Source:ZFIN;Acc:ZDB-GENE-081105-171]	8	41779002	41800215	-1	2	KNOWN	-0.275582513	-0.833311575	1.108894088	5	NA
ENSDARG00000052396	pkz	ENSDARG00000052396	115.4689235	10.10031533	11.04936742	16.25333791	0.001341015	0.000583788	0.000165484	X30 - X0_X3 - X0_X7 - X0	protein kinase containing Z-DNA binding domains [Source:ZFIN;Acc:ZDB-GENE-050301-2]	13	51166456	51175701	-1	3	KNOWN	-0.428149166	-0.714642929	1.142792096	5	NA
ENSDARG00000052402	dnmt3b	ENSDARG00000052402	399.7187435	1.578365057	2.482430338	2.97600544	0.002675492	1.85E-05	4.77E-06	X30 - X0_X3 - X0_X7 - X0	DNA (cytosine-5-)-methyltransferase 3 beta [Source:ZFIN;Acc:ZDB-GENE-050314-4]	8	24209207	24234142	1	4	KNOWN	0.193045806	-1.082448857	0.889403051	4	NA
ENSDARG00000052437	MIA	ENSDARG00000052437	66.57066124	4.836335784	4.853165864	4.057612042	0.031776615	0.02609295	0.033925049	X30 - X0_X3 - X0_X7 - X0	melanoma inhibitory activity [Source:HGNC Symbol;Acc:7076]	5	59002530	59004192	-1	1	KNOWN_BY_PROJECTION	0.595764924	0.558737708	-1.154502632	7	NA
ENSDARG00000052496	HMHA1 (1 of 2)	ENSDARG00000052496	37.98297669	3.833510099	8.215231064	7.537014049	0.002758221	5.05E-05	9.09E-05	X30 - X0_X3 - X0_X7 - X0	histocompatibility (minor) HA-1 [Source:HGNC Symbol;Acc:17102]	2	57410229	57483531	-1	1	KNOWN_BY_PROJECTION	0.715132202	-1.142702682	0.427570479	3	NA
ENSDARG00000052515	calcoco2	ENSDARG00000052515	103.2626268	8.461042292	9.440814075	12.14766126	1.09E-05	6.43E-06	2.59E-06	X30 - X0_X3 - X0_X7 - X0	calcium binding and coiled-coil domain 2 [Source:ZFIN;Acc:ZDB-GENE-050522-346]	12	21993647	22005468	1	3	KNOWN	-0.301481406	-0.814573609	1.116055015	5	NA
ENSDARG00000052518	stx4	ENSDARG00000052518	563.5802375	1.268259164	3.116353474	2.114803156	0.048360169	1.98E-06	4.57E-05	X30 - X0_X3 - X0_X7 - X0	syntaxin 4 [Source:ZFIN;Acc:ZDB-GENE-030131-2455]	12	21980050	21992713	1	1	KNOWN	1.02675474	-0.970904449	-0.05585029	2	NA
ENSDARG00000052535	ubxn10	ENSDARG00000052535	61.35918997	-1.354088433	-1.991664034	-2.077664098	0.046312151	0.000503052	0.000398304	X30 - X0_X3 - X0_X7 - X0	UBX domain protein 10 [Source:ZFIN;Acc:ZDB-GENE-060825-319]	23	37188999	37192315	1	1	KNOWN	-0.465139157	1.147847773	-0.682708616	1	NA
ENSDARG00000052565	cenpi	ENSDARG00000052565	123.5681312	3.161989491	13.39867126	8.643726828	2.46E-05	3.18E-08	1.20E-07	X30 - X0_X3 - X0_X7 - X0	centromere protein I [Source:ZFIN;Acc:ZDB-GENE-060810-127]	14	42720544	42747763	-1	1	KNOWN	0.975514483	-1.022807351	0.047292868	2	NA
ENSDARG00000052594	nkiras2	ENSDARG00000052594	117.5239027	-1.367005318	-2.049465828	-1.518763708	0.009915085	5.40E-05	0.00192127	X30 - X0_X3 - X0_X7 - X0	NFKB inhibitor interacting Ras-like 2 [Source:ZFIN;Acc:ZDB-GENE-040801-166]	3	17449318	17453983	1	1	KNOWN	-1.128515298	0.776012026	0.352503272	6	NA
ENSDARG00000052604	CPEB2	ENSDARG00000052604	241.8317748	-1.496055882	-2.203130694	-1.844368363	0.016827345	0.000325161	0.001420846	X30 - X0_X3 - X0_X7 - X0	cytoplasmic polyadenylation element binding protein 2 [Source:HGNC Symbol;Acc:21745]	23	2147585	2178737	1	3	KNOWN_BY_PROJECTION	-1.004889749	0.995037449	0.0098523	1	NA
ENSDARG00000052617	raver1	ENSDARG00000052617	101.3054465	2.16468112	9.739977579	5.661680704	0.001280715	1.80E-07	1.80E-06	X30 - X0_X3 - X0_X7 - X0	ribonucleoprotein, PTB-binding 1 [Source:ZFIN;Acc:ZDB-GENE-050522-99]	3	46597752	46625119	1	4	KNOWN	1.024573614	-0.973466471	-0.051107143	2	NA
ENSDARG00000052656	si:ch211-193e13.5	ENSDARG00000052656	39.7323884	5.89902898	12.09052834	11.87035454	0.001119836	3.75E-05	4.47E-05	X30 - X0_X3 - X0_X7 - X0	si:ch211-193e13.5 [Source:ZFIN;Acc:ZDB-GENE-081104-158]	10	7547221	7552530	1	2	KNOWN	0.608405208	-1.154133382	0.545728174	4	NA
ENSDARG00000052666	litaf	ENSDARG00000052666	568.1366765	1.409766194	3.507837907	2.478846375	0.038555503	1.12E-05	0.000134007	X30 - X0_X3 - X0_X7 - X0	lipopolysaccharide-induced TNF factor [Source:ZFIN;Acc:ZDB-GENE-040704-23]	3	42778892	42784137	-1	3	KNOWN	0.993570418	-1.006307895	0.012737477	2	NA
ENSDARG00000052667	snn	ENSDARG00000052667	266.0795509	-1.290997866	-2.073900811	-1.71862413	0.049218797	0.00012939	0.000948246	X30 - X0_X3 - X0_X7 - X0	stannin [Source:ZFIN;Acc:ZDB-GENE-040426-1987]	3	42788541	42796103	1	2	KNOWN	-0.967819473	1.029339934	-0.061520461	1	NA
ENSDARG00000052694	micall2a	ENSDARG00000052694	52.35895605	2.648326994	3.105221638	3.062423178	0.000437184	0.000124612	0.000134364	X30 - X0_X3 - X0_X7 - X0	mical-like 2a [Source:ZFIN;Acc:ZDB-GENE-030131-5409]	3	43480002	43513485	-1	2	KNOWN	0.660072894	-1.150541067	0.490468172	3	NA
ENSDARG00000052701	SMPD2 (2 of 2)	ENSDARG00000052701	274.0034097	1.214898655	3.113432564	2.054161184	0.029667007	1.99E-07	5.56E-06	X30 - X0_X3 - X0_X7 - X0	sphingomyelin phosphodiesterase 2, neutral membrane (neutral sphingomyelinase) [Source:HGNC Symbol;Acc:11121]	6	54642653	54660164	1	1	KNOWN_BY_PROJECTION	1.036311004	-0.959227636	-0.077083368	2	NA
ENSDARG00000052721	PRIM2	ENSDARG00000052721	198.7999045	1.582890476	5.702434087	3.623129729	0.013270541	1.20E-06	1.18E-05	X30 - X0_X3 - X0_X7 - X0	primase, DNA, polypeptide 2 (58kDa) [Source:HGNC Symbol;Acc:9370]	13	23712172	23836259	-1	4	KNOWN_BY_PROJECTION	1.003145923	-0.996824103	-0.00632182	2	NA
ENSDARG00000052782	glrba	ENSDARG00000052782	4689.874787	-1.330624038	-2.63660843	-2.443522225	0.020493487	6.69E-06	1.21E-05	X30 - X0_X3 - X0_X7 - X0	gylcine receptor, beta a [Source:ZFIN;Acc:ZDB-GENE-010410-2]	1	20205662	20266484	-1	2	KNOWN	-0.708867204	1.143819734	-0.43495253	1	NA
ENSDARG00000052815	alad	ENSDARG00000052815	330.7232935	1.317870042	2.337475788	1.675650735	0.014993776	8.74E-06	0.000331387	X30 - X0_X3 - X0_X7 - X0	aminolevulinate dehydratase [Source:ZFIN;Acc:ZDB-GENE-050417-123]	5	62950450	62964793	1	3	KNOWN	1.083459344	-0.887543043	-0.195916301	2	NA
ENSDARG00000052895	htra3a	ENSDARG00000052895	42.23211105	2.494797898	3.352877978	2.682069546	0.010239329	0.001648175	0.006218211	X30 - X0_X3 - X0_X7 - X0	HtrA serine peptidase 3a [Source:ZFIN;Acc:ZDB-GENE-040801-245]	1	41137978	41151045	1	2	KNOWN	1.129559323	-0.772317132	-0.357242191	2	NA
ENSDARG00000052907	bcl7a	ENSDARG00000052907	1393.888111	1.255194463	1.509835652	1.363754202	0.01675812	0.000465496	0.002994609	X30 - X0_X3 - X0_X7 - X0	B-cell CLL/lymphoma 7A [Source:ZFIN;Acc:ZDB-GENE-000607-16]	5	43411583	43418464	1	2	KNOWN	1.045341109	-0.947460472	-0.097880637	2	NA
ENSDARG00000052923	zgc:113162	ENSDARG00000052923	394.2073227	-1.689606822	-1.919377458	-1.704012867	0.001951541	0.000425288	0.0016048	X30 - X0_X3 - X0_X7 - X0	zgc:113162 [Source:ZFIN;Acc:ZDB-GENE-050522-530]	21	11585510	11634641	1	4	KNOWN	-1.152890681	0.632412362	0.52047832	6	NA
ENSDARG00000053027	FP016247.1	ENSDARG00000053027	96.26392976	6.143198467	48.75512103	30.22862839	0.007410686	3.60E-06	1.69E-05	X30 - X0_X3 - X0_X7 - X0	Uncharacterized protein [Source:UniProtKB/TrEMBL;Acc:F1Q8Q5]	16	48380792	48392159	-1	1	NOVEL	0.953813422	-1.040537767	0.086724345	2	NA
ENSDARG00000053058	rps11	ENSDARG00000053058	8762.276196	1.414661247	2.788628304	2.295032948	0.008131741	5.02E-06	2.44E-05	X30 - X0_X3 - X0_X7 - X0	ribosomal protein S11 [Source:ZFIN;Acc:ZDB-GENE-040426-2701]	3	37782011	37784026	1	2	KNOWN	0.894429492	-1.079667837	0.185238345	3	NA
ENSDARG00000053124	BX005082.1	ENSDARG00000053124	72.47351064	2.407704414	8.906766209	7.202830937	0.006697551	3.36E-06	9.98E-06	X30 - X0_X3 - X0_X7 - X0	Uncharacterized protein [Source:UniProtKB/TrEMBL;Acc:F1QAH0]	7	36245477	36246526	1	1	KNOWN	0.811416038	-1.11718747	0.305771432	3	NA
ENSDARG00000053131	irak3	ENSDARG00000053131	50.13573324	2.830143943	4.427662532	3.613703334	0.001767135	0.000108361	0.000351081	X30 - X0_X3 - X0_X7 - X0	interleukin-1 receptor-associated kinase 3 [Source:ZFIN;Acc:ZDB-GENE-060503-710]	4	11846658	11855495	-1	1	KNOWN	1.0062824	-0.993596905	-0.012685496	2	NA
ENSDARG00000053136	b2m	ENSDARG00000053136	3858.210573	6.086856652	7.041993358	8.993757621	3.86E-07	2.23E-07	1.06E-07	X30 - X0_X3 - X0_X7 - X0	beta-2-microglobulin [Source:ZFIN;Acc:ZDB-GENE-980526-88]	4	11857920	11860013	-1	4	KNOWN	-0.224215502	-0.868858893	1.093074395	5	Yes
ENSDARG00000053215	me1	ENSDARG00000053215	267.2723465	4.987874659	78.37413449	30.14101678	0.000260266	3.24E-08	2.49E-07	X30 - X0_X3 - X0_X7 - X0	malic enzyme 1, NADP(+)-dependent, cytosolic [Source:ZFIN;Acc:ZDB-GENE-061013-438]	16	35157785	35314738	-1	5	KNOWN	1.087058442	-0.880764981	-0.206293461	2	NA
ENSDARG00000053225	gnl2	ENSDARG00000053225	245.592936	1.481466079	1.961072024	1.484011801	0.022769713	0.000913321	0.021422636	X30 - X0_X3 - X0_X7 - X0	guanine nucleotide binding protein-like 2 (nucleolar) [Source:ZFIN;Acc:ZDB-GENE-040426-2317]	16	36207345	36342062	1	3	KNOWN	1.154688274	-0.581953135	-0.572735138	2	NA
ENSDARG00000053255	itgb1b	ENSDARG00000053255	453.8063211	2.277555806	8.49863242	7.431247517	0.002121072	1.61E-06	2.78E-06	X30 - X0_X3 - X0_X7 - X0	integrin, beta 1b [Source:ZFIN;Acc:ZDB-GENE-030909-10]	2	46095866	46102453	-1	1	KNOWN	0.730299196	-1.139744533	0.409445336	3	NA
ENSDARG00000053293	ftr14	ENSDARG00000053293	83.51780296	1.864677142	2.469346926	3.112803323	0.035804413	0.00413738	0.000883013	X30 - X0_X3 - X0_X7 - X0	finTRIM family, member 14 [Source:ZFIN;Acc:ZDB-GENE-060512-201]	2	43232265	43236818	-1	2	KNOWN	-0.020713916	-0.989482129	1.010196045	4	NA
ENSDARG00000053323	zgc:112285	ENSDARG00000053323	15.23755166	3.392537219	10.75905352	3.848009731	0.0167713	0.000115715	0.009996877	X30 - X0_X3 - X0_X7 - X0	zgc:112285 [Source:ZFIN;Acc:ZDB-GENE-050913-132]	12	36253477	36271852	1	2	KNOWN	1.15294187	-0.631641426	-0.521300444	2	NA
ENSDARG00000053365	rpl31	ENSDARG00000053365	6186.636604	1.549616133	2.741857376	2.424596782	0.00111066	2.95E-06	8.04E-06	X30 - X0_X3 - X0_X7 - X0	ribosomal protein L31 [Source:ZFIN;Acc:ZDB-GENE-060331-121]	9	57952115	57958901	-1	6	KNOWN	0.814873026	-1.115946544	0.301073518	3	NA
ENSDARG00000053389	PHF15	ENSDARG00000053389	116.5491431	-1.258188264	-1.890996185	-1.46555644	0.01816301	3.17E-05	0.000966477	X30 - X0_X3 - X0_X7 - X0	PHD finger protein 15 [Source:HGNC Symbol;Acc:22984]	21	44071110	44095802	1	2	KNOWN_BY_PROJECTION	-1.093437857	0.868114696	0.225323161	6	NA
ENSDARG00000053457	rpl23	ENSDARG00000053457	7876.976681	1.579078061	3.239490004	2.561530031	0.000777977	9.24E-07	4.60E-06	X30 - X0_X3 - X0_X7 - X0	ribosomal protein L23 [Source:ZFIN;Acc:ZDB-GENE-030131-8756]	3	33558104	33561921	-1	3	KNOWN	0.933653735	-1.055229814	0.12157608	2	NA
ENSDARG00000053479	gdf6a	ENSDARG00000053479	112.5237678	1.840752685	2.633376831	3.230049355	0.041462265	0.003054866	0.000950631	X30 - X0_X3 - X0_X7 - X0	growth differentiation factor 6a [Source:ZFIN;Acc:ZDB-GENE-980526-373]	16	41792075	41798152	-1	1	KNOWN	0.093718954	-1.043560319	0.949841365	4	NA
ENSDARG00000053496	gemin8	ENSDARG00000053496	286.5120252	1.363804191	2.974275663	2.088418784	0.011080462	1.88E-06	3.55E-05	X30 - X0_X3 - X0_X7 - X0	gem (nuclear organelle) associated protein 8 [Source:ZFIN;Acc:ZDB-GENE-041114-189]	1	27988878	27991937	-1	4	KNOWN	1.031651572	-0.965015363	-0.066636209	2	NA
ENSDARG00000053512	crybb2	ENSDARG00000053512	114.3186224	6.094787382	92.76611034	16.59178993	0.000780559	6.49E-08	8.83E-06	X30 - X0_X3 - X0_X7 - X0	crystallin, beta B2 [Source:ZFIN;Acc:ZDB-GENE-060130-1]	8	44670179	44676709	1	4	KNOWN	1.147570337	-0.684743453	-0.462826885	2	NA
ENSDARG00000053542	kctd12.2	ENSDARG00000053542	736.1832723	1.362730471	2.607185807	2.138686931	0.045023934	4.29E-05	0.000229401	X30 - X0_X3 - X0_X7 - X0	potassium channel tetramerisation domain containing 12.2 [Source:ZFIN;Acc:ZDB-GENE-060117-4]	1	33928606	33930081	1	1	KNOWN	0.908450636	-1.071508139	0.163057504	3	NA
ENSDARG00000053558	rtkn2	ENSDARG00000053558	124.8490535	4.658338569	39.9323717	16.69333077	6.74E-05	2.39E-08	2.18E-07	X30 - X0_X3 - X0_X7 - X0	rhotekin 2 [Source:ZFIN;Acc:ZDB-GENE-041010-225]	17	43655681	43668157	-1	2	KNOWN	1.087737549	-0.879458208	-0.208279341	2	NA
ENSDARG00000053592	prdm1b	ENSDARG00000053592	1318.187037	3.269782359	1.822735831	7.644416628	4.71E-06	0.000691121	1.02E-07	X30 - X0_X3 - X0_X7 - X0	PR domain containing 1b, with ZNF domain [Source:ZFIN;Acc:ZDB-GENE-080618-2]	19	50139187	50153197	-1	1	KNOWN	-0.799364766	-0.321956016	1.121320782	5	NA
ENSDARG00000053619	sra1	ENSDARG00000053619	180.9421423	1.235330477	1.951178568	1.483552762	0.043461002	3.18E-05	0.001355212	X30 - X0_X3 - X0_X7 - X0	steroid receptor RNA activator 1 [Source:ZFIN;Acc:ZDB-GENE-040625-6]	21	42288052	42297197	1	1	KNOWN	1.085303777	-0.884099956	-0.201203821	2	NA
ENSDARG00000053666	cmyb	ENSDARG00000053666	189.501543	7.493791976	23.96230351	19.19517981	1.81E-06	4.18E-08	6.97E-08	X30 - X0_X3 - X0_X7 - X0	transcription factor cmyb [Source:ZFIN;Acc:ZDB-GENE-991110-14]	23	32054002	32068622	1	2	KNOWN	0.835317597	-1.108081411	0.272763814	3	Yes
ENSDARG00000053713	CCDC88C	ENSDARG00000053713	360.2806811	1.759197185	1.969779336	2.784240571	0.001480959	0.000439058	2.29E-05	X30 - X0_X3 - X0_X7 - X0	coiled-coil domain containing 88C [Source:HGNC Symbol;Acc:19967]	17	38770786	38882438	1	1	KNOWN_BY_PROJECTION	-0.371830314	-0.760819581	1.132649894	5	NA
ENSDARG00000053804	osbpl2a	ENSDARG00000053804	1073.778932	-1.232719301	-1.911205933	-1.556059968	0.024048778	1.80E-05	0.000263353	X30 - X0_X3 - X0_X7 - X0	oxysterol binding protein-like 2a [Source:ZFIN;Acc:ZDB-GENE-091116-46]	23	31172484	31199085	-1	2	KNOWN	-1.01525385	0.984014073	0.031239776	1	NA
ENSDARG00000053835	plekhh1	ENSDARG00000053835	147.4199687	2.115601319	7.086669864	4.364800354	0.002938194	1.86E-06	1.93E-05	X30 - X0_X3 - X0_X7 - X0	pleckstrin homology domain containing, family H (with MyTH4 domain) member 1 [Source:ZFIN;Acc:ZDB-GENE-061219-1]	17	38100224	38190791	1	1	KNOWN	1.03014367	-0.966849452	-0.063294218	2	NA
ENSDARG00000053857	zgc:162431	ENSDARG00000053857	140.5117514	1.90545713	5.320050611	4.800365501	0.009204884	6.13E-06	1.04E-05	X30 - X0_X3 - X0_X7 - X0	zgc:162431 [Source:ZFIN;Acc:ZDB-GENE-070410-81]	23	30251819	30284312	-1	7	KNOWN	0.712794517	-1.143126553	0.430332036	3	NA
ENSDARG00000053858	crip1	ENSDARG00000053858	345.8346099	2.604928232	9.413316425	7.18316266	0.01139606	2.24E-05	7.15E-05	X30 - X0_X3 - X0_X7 - X0	cysteine-rich protein 1 [Source:ZFIN;Acc:ZDB-GENE-041111-1]	17	37553329	37563014	-1	3	KNOWN	0.868000042	-1.093493725	0.225493683	3	NA
ENSDARG00000053928	CR848836.4	ENSDARG00000053928	7.967839334	9.306378486	10.54405516	12.02092369	0.003274546	0.00186912	0.001003628	X30 - X0_X3 - X0_X7 - X0	Uncharacterized protein [Source:UniProtKB/TrEMBL;Acc:E7FG53]	15	36464910	36466297	-1	1	NOVEL	-0.058667392	-0.969374771	1.028042163	4	NA
ENSDARG00000053929	opn4b	ENSDARG00000053929	241.8913703	-1.428938417	-1.775638214	-1.600882032	0.016607859	0.001049628	0.003665875	X30 - X0_X3 - X0_X7 - X0	opsin 4b [Source:ZFIN;Acc:ZDB-GENE-080415-3]	12	27656707	27694335	-1	1	KNOWN	-1.002693135	0.997284928	0.005408207	1	NA
ENSDARG00000053990	hmgb2b	ENSDARG00000053990	3174.546263	1.454151307	2.590488925	2.108439613	0.000190094	2.33E-07	1.31E-06	X30 - X0_X3 - X0_X7 - X0	high-mobility group box 2b [Source:ZFIN;Acc:ZDB-GENE-040912-122]	23	45378522	45382172	1	1	KNOWN	0.945860516	-1.046524987	0.100664471	2	NA
ENSDARG00000054002	hn1a	ENSDARG00000054002	119.2006561	1.400034252	2.121308032	2.355497418	0.043968035	0.00043313	0.000159379	X30 - X0_X3 - X0_X7 - X0	hematological and neurological expressed 1a [Source:ZFIN;Acc:ZDB-GENE-070410-142]	6	18694282	18705019	1	1	KNOWN	0.326030719	-1.122326559	0.79629584	4	NA
ENSDARG00000054048	plin1	ENSDARG00000054048	32.16476694	2.229334884	3.78369549	3.111072039	0.015148576	0.00047348	0.001775837	X30 - X0_X3 - X0_X7 - X0	perilipin 1 [Source:ZFIN;Acc:ZDB-GENE-050419-213]	18	25014407	25060329	-1	2	KNOWN	0.952287172	-1.041706895	0.089419723	2	NA
ENSDARG00000054054	zgc:153219	ENSDARG00000054054	25.5041849	2.428756373	7.483226397	7.7146809	0.006006159	4.63E-06	4.15E-06	X30 - X0_X3 - X0_X7 - X0	zgc:153219 [Source:ZFIN;Acc:ZDB-GENE-060929-144]	7	34465149	34469417	1	2	KNOWN	0.538176557	-1.153833719	0.615657162	4	NA
ENSDARG00000054063	arpc4	ENSDARG00000054063	1496.415428	1.276639332	2.914505085	1.924234189	0.033422746	2.36E-06	8.90E-05	X30 - X0_X3 - X0_X7 - X0	actin related protein 2/3 complex, subunit 4 [Source:ZFIN;Acc:ZDB-GENE-010724-9]	6	40692490	40699590	-1	3	KNOWN	1.062020367	-0.923546239	-0.138474129	2	NA
ENSDARG00000054137	gpr126	ENSDARG00000054137	28.40305933	4.027130159	3.861024849	7.601025028	0.014312244	0.014130752	0.000484978	X30 - X0_X3 - X0_X7 - X0	G protein-coupled receptor 126 [Source:ZFIN;Acc:ZDB-GENE-041014-357]	20	37407642	37494828	1	6	KNOWN	-0.616210178	-0.537598028	1.153808206	5	NA
ENSDARG00000054155	pcna	ENSDARG00000054155	3251.223416	1.266357642	2.923565157	1.897268627	0.007749258	2.30E-07	9.20E-06	X30 - X0_X3 - X0_X7 - X0	proliferating cell nuclear antigen [Source:ZFIN;Acc:ZDB-GENE-000210-8]	10	42187909	42192762	-1	1	KNOWN	1.069430285	-0.9118612	-0.157569085	2	NA
ENSDARG00000054213	hectd1	ENSDARG00000054213	5709.972545	-1.169494321	-1.325734682	-1.317559032	0.049016508	0.002280302	0.002569946	X30 - X0_X3 - X0_X7 - X0	HECT domain containing 1 [Source:ZFIN;Acc:ZDB-GENE-030616-153]	17	28729242	28760393	1	8	KNOWN	-0.623210228	1.153452344	-0.530242116	1	NA
ENSDARG00000054272	caprin1b	ENSDARG00000054272	4740.294498	1.26671326	1.528699886	1.841258178	0.015909358	0.000448358	3.52E-05	X30 - X0_X3 - X0_X7 - X0	cell cycle associated protein 1b [Source:ZFIN;Acc:ZDB-GENE-040426-2020]	18	36685086	36708587	-1	4	KNOWN	-0.058604633	-0.969408915	1.028013547	4	NA
ENSDARG00000054318	stk33	ENSDARG00000054318	7.815652735	3.519425214	9.940270466	4.39875159	0.032309698	0.000382142	0.011892633	X30 - X0_X3 - X0_X7 - X0	serine/threonine kinase 33 [Source:ZFIN;Acc:ZDB-GENE-040724-242]	7	29711231	29740214	-1	4	KNOWN	1.145453863	-0.699026522	-0.446427341	2	NA
ENSDARG00000054340	sla1	ENSDARG00000054340	282.4594268	3.085823347	27.52957486	16.57982817	0.001004306	1.43E-07	5.53E-07	X30 - X0_X3 - X0_X7 - X0	Src-like-adaptor 1 [Source:ZFIN;Acc:ZDB-GENE-050904-3]	19	36462215	36475561	-1	1	KNOWN	0.963566285	-1.032832152	0.069265867	2	NA
ENSDARG00000054389	rhof	ENSDARG00000054389	36.10844898	1.779452817	4.508371266	2.941069393	0.005032814	2.44E-06	4.43E-05	X30 - X0_X3 - X0_X7 - X0	ras homolog gene family, member F [Source:ZFIN;Acc:ZDB-GENE-050522-280]	10	43334553	43345922	-1	2	KNOWN	1.045709183	-0.946964517	-0.098744666	2	NA
ENSDARG00000054418	zgc:136895	ENSDARG00000054418	30.81166682	5.134724296	7.956909468	11.38610453	0.019602316	0.002757238	0.000636064	X30 - X0_X3 - X0_X7 - X0	zgc:136895 [Source:ZFIN;Acc:ZDB-GENE-060421-4694]	22	33649000	33663058	-1	1	KNOWN	-0.064631943	-0.966116317	1.030748259	4	NA
ENSDARG00000054438	fzd2	ENSDARG00000054438	525.5355288	2.869377625	8.457185128	7.320094894	0.000410826	2.14E-06	3.78E-06	X30 - X0_X3 - X0_X7 - X0	frizzled homolog 2 [Source:ZFIN;Acc:ZDB-GENE-990415-224]	3	31758800	31761152	1	1	KNOWN	0.759073036	-1.133098788	0.374025752	3	NA
ENSDARG00000054447	SLC29A1 (1 of 2)	ENSDARG00000054447	24.1871699	2.139695338	5.931627345	7.037910658	0.031398084	5.24E-05	2.14E-05	X30 - X0_X3 - X0_X7 - X0	solute carrier family 29 (equilibrative nucleoside transporter), member 1 [Source:HGNC Symbol;Acc:11003]	11	44547900	44568489	1	1	KNOWN_BY_PROJECTION	0.348483899	-1.127614505	0.779130606	4	NA
ENSDARG00000054451	loxl1	ENSDARG00000054451	821.1940259	1.551148762	3.202483246	3.080538061	0.015983805	2.43E-05	3.27E-05	X30 - X0_X3 - X0_X7 - X0	lysyl oxidase-like 1 [Source:ZFIN;Acc:ZDB-GENE-060503-693]	18	48978530	49006206	-1	2	KNOWN	0.642340375	-1.152163047	0.509822672	3	NA
ENSDARG00000054583	mfsd6b	ENSDARG00000054583	150.2344069	1.605209356	2.284829871	3.53074	0.001289424	2.16E-05	8.86E-07	X30 - X0_X3 - X0_X7 - X0	major facilitator superfamily domain containing 6b [Source:ZFIN;Acc:ZDB-GENE-040912-84]	9	42555874	42580755	-1	3	KNOWN	-0.193296926	-0.88924059	1.082537515	5	NA
ENSDARG00000054609	slco2b1	ENSDARG00000054609	411.9137983	2.000105572	3.662664153	3.877663537	0.002171591	2.64E-05	2.18E-05	X30 - X0_X3 - X0_X7 - X0	solute carrier organic anion transporter family, member 2B1 [Source:ZFIN;Acc:ZDB-GENE-051023-6]	21	38976897	39011059	-1	7	KNOWN	0.469568065	-1.148364557	0.678796492	4	NA
ENSDARG00000054610	coro1a	ENSDARG00000054610	1585.347051	3.139473944	16.70341925	9.500480261	1.07E-05	2.25E-08	8.62E-08	X30 - X0_X3 - X0_X7 - X0	coronin, actin binding protein, 1A [Source:ZFIN;Acc:ZDB-GENE-030131-9512]	3	31077483	31092481	-1	1	KNOWN	1.020035659	-0.978681292	-0.041354367	2	NA
ENSDARG00000054688	ITPRIPL2	ENSDARG00000054688	26.44888528	3.492359898	15.63437388	11.51903393	0.029858405	9.54E-05	0.000304951	X30 - X0_X3 - X0_X7 - X0	inositol 1,4,5-trisphosphate receptor interacting protein-like 2 [Source:HGNC Symbol;Acc:27257]	3	31392057	31393454	-1	1	KNOWN_BY_PROJECTION	0.87757409	-1.088708415	0.211134325	3	NA
ENSDARG00000054818	rpl32	ENSDARG00000054818	9385.661401	1.472060706	2.597656275	2.258613382	0.003756242	7.43E-06	2.45E-05	X30 - X0_X3 - X0_X7 - X0	ribosomal protein L32 [Source:ZFIN;Acc:ZDB-GENE-060331-105]	22	33728358	33733333	1	1	KNOWN	0.845486701	-1.103819102	0.258332401	3	NA
ENSDARG00000054827	zgc:162724	ENSDARG00000054827	84.87660319	3.634332248	17.31267165	13.39318935	0.001941729	1.89E-06	4.60E-06	X30 - X0_X3 - X0_X7 - X0	zgc:162724 [Source:ZFIN;Acc:ZDB-GENE-070424-72]	22	33693624	33726369	-1	3	KNOWN	0.832775239	-1.109109823	0.276334584	3	NA
ENSDARG00000054890	rgra	ENSDARG00000054890	2625.463825	-1.358119817	-2.292004009	-1.458552954	0.021345615	3.95E-05	0.005882378	X30 - X0_X3 - X0_X7 - X0	retinal G protein coupled receptor a [Source:ZFIN;Acc:ZDB-GENE-040924-6]	13	29669828	29679461	-1	1	KNOWN	-1.149147443	0.672528382	0.476619061	6	NA
ENSDARG00000054911	tmsb	ENSDARG00000054911	1267.956937	10.35645897	27.55957418	30.3063144	5.85E-07	5.25E-08	4.43E-08	X30 - X0_X3 - X0_X7 - X0	thymosin, beta [Source:ZFIN;Acc:ZDB-GENE-050307-5]	21	25782878	25786220	1	1	KNOWN	0.445659842	-1.145348473	0.699688631	4	Yes
ENSDARG00000054921	wu:fd58b11	ENSDARG00000054921	125.1304719	3.284312826	14.16233157	12.3985752	0.000369949	3.05E-07	4.88E-07	X30 - X0_X3 - X0_X7 - X0	wu:fd58b11 [Source:ZFIN;Acc:ZDB-GENE-030131-4747]	4	61874514	61880599	-1	1	NOVEL	0.721777154	-1.14145139	0.419674236	3	NA
ENSDARG00000054929	zgc:110540	ENSDARG00000054929	250.1718629	4.74475195	17.66819888	12.19329583	5.53E-06	4.68E-08	1.16E-07	X30 - X0_X3 - X0_X7 - X0	zgc:110540 [Source:ZFIN;Acc:ZDB-GENE-050327-77]	21	25879336	25883673	-1	1	KNOWN	0.945426182	-1.046844609	0.101418427	2	NA
ENSDARG00000054942	lgals2a	ENSDARG00000054942	2292.769061	4.240348999	37.94128574	15.22011417	1.63E-05	2.65E-08	1.73E-07	X30 - X0_X3 - X0_X7 - X0	lectin, galactoside-binding, soluble, 2a [Source:ZFIN;Acc:ZDB-GENE-050318-2]	3	29104393	29111376	1	2	KNOWN	1.094216366	-0.866510606	-0.22770576	2	NA
ENSDARG00000054968	cd40	ENSDARG00000054968	229.9070432	2.239681141	4.500757338	4.27719201	0.000251994	2.26E-06	2.92E-06	X30 - X0_X3 - X0_X7 - X0	CD40 antigen [Source:ZFIN;Acc:ZDB-GENE-090313-95]	23	37916785	37929019	-1	1	KNOWN	0.66474087	-1.150043769	0.4853029	3	NA
ENSDARG00000055009	col4a1	ENSDARG00000055009	254.7614946	3.638714494	5.161045519	6.974053637	0.000339313	4.54E-05	1.17E-05	X30 - X0_X3 - X0_X7 - X0	collagen, type IV, alpha 1 [Source:ZFIN;Acc:ZDB-GENE-081105-114]	9	8676056	8715240	-1	2	KNOWN	-0.058027049	-0.969723001	1.027750049	4	NA
ENSDARG00000055069	FRRS1L	ENSDARG00000055069	579.1927016	-1.228207239	-1.921021072	-1.670770035	0.047391015	4.64E-05	0.000264889	X30 - X0_X3 - X0_X7 - X0	ferric-chelate reductase 1-like [Source:HGNC Symbol;Acc:1362]	16	29425637	29435814	1	1	KNOWN_BY_PROJECTION	-0.896039251	1.078761447	-0.182722196	1	NA
ENSDARG00000055093	CR925817.1	ENSDARG00000055093	68.70646311	-1.652784389	-3.718791377	-2.794251483	0.048359408	0.000254481	0.000999813	X30 - X0_X3 - X0_X7 - X0	Uncharacterized protein [Source:UniProtKB/TrEMBL;Acc:E7FC11]	11	7088958	7116700	-1	1	NOVEL	-0.963232311	1.033102906	-0.069870594	1	NA
ENSDARG00000055120	ctsba	ENSDARG00000055120	5404.307623	1.673694518	8.897939837	3.860573228	0.011934176	5.45E-07	1.80E-05	X30 - X0_X3 - X0_X7 - X0	cathepsin B, a [Source:ZFIN;Acc:ZDB-GENE-040426-2650]	17	32828689	32837272	1	10	KNOWN	1.103258959	-0.846781562	-0.256477397	2	NA
ENSDARG00000055133	cenpf	ENSDARG00000055133	406.7968083	8.615715979	38.99497504	28.29394777	6.44E-07	1.39E-08	2.30E-08	X30 - X0_X3 - X0_X7 - X0	centromere protein F, (mitosin) [Source:ZFIN;Acc:ZDB-GENE-041111-205]	17	32927923	32948802	-1	4	KNOWN	0.888657948	-1.082854845	0.194196897	3	Yes
ENSDARG00000055136	si:dkey-101k6.5	ENSDARG00000055136	215.5604213	2.801882002	5.358350042	7.423934001	0.008754787	0.000273361	9.54E-05	X30 - X0_X3 - X0_X7 - X0	si:dkey-101k6.5 [Source:ZFIN;Acc:ZDB-GENE-081105-143]	9	39613770	39639338	-1	2	KNOWN	0.070670467	-1.033460608	0.962790142	4	NA
ENSDARG00000055151	smyd2a	ENSDARG00000055151	519.322339	1.324762894	1.591348809	1.41330045	0.002200874	7.07E-05	0.000575051	X30 - X0_X3 - X0_X7 - X0	SET and MYND domain containing 2a [Source:ZFIN;Acc:ZDB-GENE-050320-126]	17	32951521	32985314	-1	5	KNOWN	1.091600458	-0.871846743	-0.219753715	2	NA
ENSDARG00000055154	slc8a4a	ENSDARG00000055154	307.412189	-1.320040854	-2.345522257	-1.89155929	0.030597882	2.98E-05	0.000211872	X30 - X0_X3 - X0_X7 - X0	solute carrier family 8 (sodium/calcium exchanger), member 4a [Source:ZFIN;Acc:ZDB-GENE-060110-2]	21	26441727	26580309	-1	2	KNOWN	-0.959688936	1.035945052	-0.076256117	1	NA
ENSDARG00000055175	c1qtnf6a	ENSDARG00000055175	5.386996807	4.232014852	6.163874769	10.79880042	0.027706266	0.008451969	0.00100529	X30 - X0_X3 - X0_X7 - X0	C1q and tumor necrosis factor related protein 6a [Source:ZFIN;Acc:ZDB-GENE-080108-3]	3	25322121	25323822	1	1	KNOWN	-0.266982071	-0.839412059	1.106394129	5	NA
ENSDARG00000055186	ccr9a	ENSDARG00000055186	786.2589039	4.631145878	17.27744049	13.54215826	1.02E-05	9.91E-08	1.80E-07	X30 - X0_X3 - X0_X7 - X0	chemokine (C-C motif) receptor 9a [Source:ZFIN;Acc:ZDB-GENE-060130-125]	2	32514748	32516958	1	1	KNOWN	0.840433617	-1.105967128	0.265533511	3	NA
ENSDARG00000055206	dtnbp1b	ENSDARG00000055206	309.7313805	-1.233877331	-2.025055629	-1.823554746	0.048246281	3.37E-05	9.96E-05	X30 - X0_X3 - X0_X7 - X0	dystrobrevin binding protein 1b [Source:ZFIN;Acc:ZDB-GENE-060503-889]	19	26647374	26720884	-1	1	KNOWN	-0.804791255	1.119496232	-0.314704977	1	NA
ENSDARG00000055226	slc7a7	ENSDARG00000055226	787.8009164	2.476841927	32.70389285	10.062573	0.004974666	2.23E-07	5.40E-06	X30 - X0_X3 - X0_X7 - X0	solute carrier family 7 (cationic amino acid transporter, y+ system), member 7 [Source:ZFIN;Acc:ZDB-GENE-051127-5]	7	20719641	20745138	1	1	KNOWN	1.120613097	-0.801490534	-0.319122563	2	NA
ENSDARG00000055229	ncs1a	ENSDARG00000055229	965.7712161	-1.307863201	-2.244608782	-2.416730166	0.048938946	5.82E-05	3.34E-05	X30 - X0_X3 - X0_X7 - X0	neuronal calcium sensor 1a [Source:ZFIN;Acc:ZDB-GENE-021220-1]	5	34040502	34062017	-1	1	KNOWN	-0.427100644	1.142629856	-0.715529212	1	NA
ENSDARG00000055232	fancc	ENSDARG00000055232	35.89311783	1.851133173	4.03969116	2.990696899	0.03558255	9.98E-05	0.000701542	X30 - X0_X3 - X0_X7 - X0	Fanconi anemia, complementation group C [Source:ZFIN;Acc:ZDB-GENE-060510-2]	8	30960666	31004159	1	5	KNOWN	0.98592424	-1.013505148	0.027580908	2	NA
ENSDARG00000055252	zgc:123218	ENSDARG00000055252	11.59943712	5.884272898	25.57509183	14.65313116	0.002387568	1.19E-05	8.87E-05	X30 - X0_X3 - X0_X7 - X0	zgc:123218 [Source:ZFIN;Acc:ZDB-GENE-051030-75]	17	33639324	33646778	1	2	KNOWN	1.034389281	-0.961637114	-0.072752167	2	NA
ENSDARG00000055276	rel	ENSDARG00000055276	140.6623029	3.586704495	10.58598178	8.122884217	0.000667497	3.78E-06	1.10E-05	X30 - X0_X3 - X0_X7 - X0	v-rel reticuloendotheliosis viral oncogene homolog [Source:ZFIN;Acc:ZDB-GENE-040718-255]	13	26019401	26043715	-1	1	KNOWN	0.888376301	-1.083007891	0.19463159	3	NA
[truncated: 1,283 more rows]
