# Supplementary material for: Incomplete Recovery of Zebrafish Retina Following Cryoinjury
Source: Cells. 2022 Apr 18;11(8):1373. doi: 10.3390/cells11081373 (PMC9030934; doi:10.3390/cells11081373)
Supplement: Supplementary file 1 [file cells-11-01373-s001.zip › Table S4 update.xlsx]

## Sheet: clust_pathway_summary
Cluster	Gene count	n	Total cluster count	Significantly associated gene clusters*
1	270	216	18	0
2	969	808	57	3
3	616	491	40	3
4	325	250	27	1
5	201	154	13	1
6	102	74	5	0
7	42	37	1	0
8	60	53	6	1
9	9	3	0	0
10	14	8	0	0
11	8	6	1	0
12	3	1	0	0
13	6	3	1	0
*Significantly assocciation after Bonferroni correction

## Sheet: Significant_enrichment_summary
DEG_cluster	Annotation cluster	Enrichment Score (within GO annotation cluster)	Category	Term	Count	%	PValue	Ensembl.Gene.ID	Associated.Gene.Name	List Total	Pop Hits	Pop Total	Fold Enrichment	Bonferroni	Benjamini	FDR
2	1	12.0866	GOTERM_CC_DIRECT	GO:0005840~ribosome	34	4.20792	1.04e-15	ENSDARG00000056903, ENSDARG00000053457, ENSDARG00000021864, ENSDARG00000019181, ENSDARG00000041811, ENSDARG00000058451, ENSDARG00000021838, ENSDARG00000070849, ENSDARG00000035692, ENSDARG00000011201, ENSDARG00000043509, ENSDARG00000008068, ENSDARG00000042566, ENSDARG00000011405, ENSDARG00000025581, ENSDARG00000010516, ENSDARG00000077717, ENSDARG00000032725, ENSDARG00000046157, ENSDARG00000005827,…	mrpl13, rpl23, rplp1, rpsa, rps25, rpl6, rps23, rps15, rps3a, rplp2l, rpl11, tma16, rps7, rps9, rpl10, rpl21, RPL29, rps27a, RPS17, eif2s1a, eif2s1b, rplp0, rpl38, rpl23a, rps2, rpl22l1, rps12, rps28, rpl36a, rpl18a, rpl39, rps10, rpl35a, rpl13a	571	162	15208	5.58985	2.71e-13	1.41e-13	1.26e-13
2	1	12.0866	UP_KEYWORDS	Ribosomal protein	26	3.21782	7.1e-13	ENSDARG00000056903, ENSDARG00000053457, ENSDARG00000021864, ENSDARG00000019181, ENSDARG00000041811, ENSDARG00000058451, ENSDARG00000021838, ENSDARG00000070849, ENSDARG00000035692, ENSDARG00000011201, ENSDARG00000043509, ENSDARG00000042566, ENSDARG00000011405, ENSDARG00000025581, ENSDARG00000010516, ENSDARG00000051783, ENSDARG00000006413, ENSDARG00000006316, ENSDARG00000077291, ENSDARG00000036875,…	mrpl13, rpl23, rplp1, rpsa, rps25, rpl6, rps23, rps15, rps3a, rplp2l, rpl11, rps7, rps9, rpl10, rpl21, rplp0, rpl38, rpl23a, rps2, rps12, rps28, rpl36a, rpl18a, rps10, rpl35a, rpl13a	794	121	22487	6.08554	1.51e-10	7.57e-11	6.86e-11
2	1	12.0866	KEGG_PATHWAY	dre03010:Ribosome	31	3.83663	1.12e-11	ENSDARG00000056903, ENSDARG00000053457, ENSDARG00000021864, ENSDARG00000019181, ENSDARG00000041811, ENSDARG00000058451, ENSDARG00000021838, ENSDARG00000070849, ENSDARG00000035692, ENSDARG00000011201, ENSDARG00000043509, ENSDARG00000042566, ENSDARG00000011405, ENSDARG00000025581, ENSDARG00000010516, ENSDARG00000077717, ENSDARG00000032725, ENSDARG00000046157, ENSDARG00000051783, ENSDARG00000006413,…	mrpl13, rpl23, rplp1, rpsa, rps25, rpl6, rps23, rps15, rps3a, rplp2l, rpl11, rps7, rps9, rpl10, rpl21, RPL29, rps27a, RPS17, rplp0, rpl38, rpl23a, rps2, rpl22l1, rps12, rps28, rpl36a, rpl18a, rpl39, rps10, rpl35a, rpl13a	294	134	5405	4.2531	1.34e-09	1.34e-09	1.27e-09
2	1	12.0866	GOTERM_MF_DIRECT	GO:0003735~structural constituent of ribosome	31	3.83663	5.47e-11	ENSDARG00000056903, ENSDARG00000053457, ENSDARG00000021864, ENSDARG00000019181, ENSDARG00000058451, ENSDARG00000021838, ENSDARG00000070849, ENSDARG00000007130, ENSDARG00000035692, ENSDARG00000011201, ENSDARG00000043509, ENSDARG00000042566, ENSDARG00000011405, ENSDARG00000025581, ENSDARG00000010516, ENSDARG00000077717, ENSDARG00000032725, ENSDARG00000046157, ENSDARG00000051783, ENSDARG00000006413,…	mrpl13, rpl23, rplp1, rpsa, rpl6, rps23, rps15, mrto4, rps3a, rplp2l, rpl11, rps7, rps9, rpl10, rpl21, RPL29, rps27a, RPS17, rplp0, rpl38, rpl23a, rps2, rpl22l1, rps12, rps28, rpl36a, rpl18a, rpl39, rps10, rpl35a, rpl13a	549	212	15797	4.20754	3.49e-08	3.49e-08	3.46e-08
2	2	4.4421	INTERPRO	IPR002194:Chaperonin TCP-1, conserved site	6	0.742574	2.53e-06	ENSDARG00000013475, ENSDARG00000021252, ENSDARG00000008243, ENSDARG00000045399, ENSDARG00000017891, ENSDARG00000016173	cct4, cct6a, cct8, cct5, tcp1, cct3	739	8	21293	21.6099	0.00338639	0.00169607	0.00168973
2	2	4.4421	INTERPRO	IPR027410:TCP-1-like chaperonin intermediate domain	6	0.742574	5.54e-06	ENSDARG00000013475, ENSDARG00000021252, ENSDARG00000008243, ENSDARG00000045399, ENSDARG00000017891, ENSDARG00000016173	cct4, cct6a, cct8, cct5, tcp1, cct3	739	9	21293	19.2088	0.00738644	0.00185346	0.00184654
2	2	4.4421	INTERPRO	IPR017998:Chaperone tailless complex polypeptide 1 (TCP-1)	6	0.742574	5.54e-06	ENSDARG00000013475, ENSDARG00000021252, ENSDARG00000008243, ENSDARG00000045399, ENSDARG00000017891, ENSDARG00000016173	cct4, cct6a, cct8, cct5, tcp1, cct3	739	9	21293	19.2088	0.00738644	0.00185346	0.00184654
2	2	4.4421	INTERPRO	IPR027409:GroEL-like apical domain	6	0.742574	3.19e-05	ENSDARG00000013475, ENSDARG00000021252, ENSDARG00000008243, ENSDARG00000045399, ENSDARG00000017891, ENSDARG00000016173	cct4, cct6a, cct8, cct5, tcp1, cct3	739	12	21293	14.4066	0.0418202	0.00610274	0.00607995
2	2	4.4421	INTERPRO	IPR027413:GroEL-like equatorial domain	6	0.742574	3.19e-05	ENSDARG00000013475, ENSDARG00000021252, ENSDARG00000008243, ENSDARG00000045399, ENSDARG00000017891, ENSDARG00000016173	cct4, cct6a, cct8, cct5, tcp1, cct3	739	12	21293	14.4066	0.0418202	0.00610274	0.00607995
2	3	3.54522	INTERPRO	IPR019821:Kinesin, motor region, conserved site	10	1.23762	2.4e-05	ENSDARG00000044491, ENSDARG00000062187, ENSDARG00000010948, ENSDARG00000040110, ENSDARG00000076228, ENSDARG00000008022, ENSDARG00000005462, ENSDARG00000071009, ENSDARG00000063385, ENSDARG00000014943	kif20a, kif14, kif11, kif20bb, kif2c, kif18a, KIF4A, KIF20B, cenpe, kif23	739	46	21293	6.26375	0.031576	0.00610274	0.00607995
2	3	3.54522	SMART	SM00129:KISc	10	1.23762	3.63e-05	ENSDARG00000044491, ENSDARG00000062187, ENSDARG00000010948, ENSDARG00000040110, ENSDARG00000076228, ENSDARG00000008022, ENSDARG00000005462, ENSDARG00000071009, ENSDARG00000063385, ENSDARG00000014943	kif20a, kif14, kif11, kif20bb, kif2c, kif18a, KIF4A, KIF20B, cenpe, kif23	392	52	12157	5.96399	0.0100315	0.010082	0.010082
3	1	26.8198	GOTERM_CC_DIRECT	GO:0005840~ribosome	42	8.55397	2.12e-31	ENSDARG00000003599, ENSDARG00000029500, ENSDARG00000055996, ENSDARG00000053058, ENSDARG00000043453, ENSDARG00000020197, ENSDARG00000014690, ENSDARG00000037071, ENSDARG00000037350, ENSDARG00000041703, ENSDARG00000093606, ENSDARG00000015128, ENSDARG00000041435, ENSDARG00000015862, ENSDARG00000005791, ENSDARG00000041232, ENSDARG00000035871, ENSDARG00000018334, ENSDARG00000054818, ENSDARG00000013307,…	rpl3, rpl34, rps8a, rps11, rps5, rpl5a, rps4x, rps26, rpl9, rrbp1b, RPS11 (1 of 2), rpl27, uba52, rpl5b, rpl28, rps29, rpl30, rpl35, rpl32, rpl19, rps14, rps19, rps27.1, rps21, rps26l, rpl7a, rpl18, rpl31, rps16, rpl10a, rpl37, rps24, rpl15, rps13, rps15a, rpl12, rpl7, rpl17, rpl22, rpl8, rps6, rpl4	350	162	15208	11.2652	2.72e-29	2.72e-29	2.61e-29
3	1	26.8198	KEGG_PATHWAY	dre03010:Ribosome	40	8.14664	2.21e-31	ENSDARG00000003599, ENSDARG00000029500, ENSDARG00000055996, ENSDARG00000053058, ENSDARG00000043453, ENSDARG00000020197, ENSDARG00000014690, ENSDARG00000037071, ENSDARG00000037350, ENSDARG00000015128, ENSDARG00000041435, ENSDARG00000015862, ENSDARG00000005791, ENSDARG00000041232, ENSDARG00000035871, ENSDARG00000018334, ENSDARG00000054818, ENSDARG00000013307, ENSDARG00000036629, ENSDARG00000030602,…	rpl3, rpl34, rps8a, rps11, rps5, rpl5a, rps4x, rps26, rpl9, rpl27, uba52, rpl5b, rpl28, rps29, rpl30, rpl35, rpl32, rpl19, rps14, rps19, rps27.1, rps21, rps26l, rpl7a, rpl18, rpl31, rps16, rpl10a, rpl37, rps24, rpl15, rps13, rps15a, rpl12, rpl7, rpl17, rpl22, rpl8, rps6, rpl4	145	134	5405	11.1271	1.72e-29	1.72e-29	1.72e-29
3	1	26.8198	UP_KEYWORDS	Ribosomal protein	36	7.33198	5.57e-30	ENSDARG00000003599, ENSDARG00000029500, ENSDARG00000055996, ENSDARG00000053058, ENSDARG00000043453, ENSDARG00000020197, ENSDARG00000014690, ENSDARG00000037071, ENSDARG00000037350, ENSDARG00000015128, ENSDARG00000041435, ENSDARG00000015862, ENSDARG00000005791, ENSDARG00000041232, ENSDARG00000035871, ENSDARG00000018334, ENSDARG00000013307, ENSDARG00000036629, ENSDARG00000030602, ENSDARG00000023298,…	rpl3, rpl34, rps8a, rps11, rps5, rpl5a, rps4x, rps26, rpl9, rpl27, uba52, rpl5b, rpl28, rps29, rpl30, rpl35, rpl19, rps14, rps19, rps27.1, rps21, rps26l, rpl7a, rps16, rpl10a, rpl37, rps24, rpl15, rps13, rps15a, rpl12, rpl7, rpl17, rpl8, rps6, rpl4	481	121	22487	13.9092	9.08e-28	9.08e-28	8.97e-28
3	1	26.8198	GOTERM_MF_DIRECT	GO:0003735~structural constituent of ribosome	40	8.14664	4.42e-25	ENSDARG00000003599, ENSDARG00000029500, ENSDARG00000055996, ENSDARG00000053058, ENSDARG00000043453, ENSDARG00000020197, ENSDARG00000014690, ENSDARG00000037071, ENSDARG00000037350, ENSDARG00000093606, ENSDARG00000015128, ENSDARG00000041435, ENSDARG00000015862, ENSDARG00000005791, ENSDARG00000041232, ENSDARG00000035871, ENSDARG00000018334, ENSDARG00000054818, ENSDARG00000013307, ENSDARG00000036629,…	rpl3, rpl34, rps8a, rps11, rps5, rpl5a, rps4x, rps26, rpl9, RPS11 (1 of 2), rpl27, uba52, rpl5b, rpl28, rps29, rpl30, rpl35, rpl32, rpl19, rps14, rps19, rps27.1, rps21, rps26l, rpl18, rpl31, rps16, rpl10a, rpl37, rps24, rpl15, rps13, rps15a, rpl12, rpl7, rpl17, rpl22, rpl8, rps6, rpl4	347	212	15797	8.58953	1.43e-22	1.43e-22	1.43e-22
3	1	26.8198	UP_KEYWORDS	Ribonucleoprotein	37	7.53564	3.42e-24	ENSDARG00000003599, ENSDARG00000029500, ENSDARG00000055996, ENSDARG00000053058, ENSDARG00000043453, ENSDARG00000020197, ENSDARG00000014690, ENSDARG00000037071, ENSDARG00000037350, ENSDARG00000015128, ENSDARG00000041435, ENSDARG00000015862, ENSDARG00000005791, ENSDARG00000041232, ENSDARG00000035871, ENSDARG00000018334, ENSDARG00000023160, ENSDARG00000013307, ENSDARG00000036629, ENSDARG00000030602,…	rpl3, rpl34, rps8a, rps11, rps5, rpl5a, rps4x, rps26, rpl9, rpl27, uba52, rpl5b, rpl28, rps29, rpl30, rpl35, snrnp40, rpl19, rps14, rps19, rps27.1, rps21, rps26l, rpl7a, rps16, rpl10a, rpl37, rps24, rpl15, rps13, rps15a, rpl12, rpl7, rpl17, rpl8, rps6, rpl4	481	186	22487	9.29983	5.58e-22	2.79e-22	2.76e-22
3	1	26.8198	GOTERM_CC_DIRECT	GO:0030529~intracellular ribonucleoprotein complex	38	7.73931	3.05e-23	ENSDARG00000003599, ENSDARG00000029500, ENSDARG00000055996, ENSDARG00000053058, ENSDARG00000043453, ENSDARG00000020197, ENSDARG00000014690, ENSDARG00000037071, ENSDARG00000037350, ENSDARG00000015128, ENSDARG00000041435, ENSDARG00000015862, ENSDARG00000005791, ENSDARG00000041232, ENSDARG00000035871, ENSDARG00000018334, ENSDARG00000023160, ENSDARG00000013307, ENSDARG00000036629, ENSDARG00000030602,…	rpl3, rpl34, rps8a, rps11, rps5, rpl5a, rps4x, rps26, rpl9, rpl27, uba52, rpl5b, rpl28, rps29, rpl30, rpl35, snrnp40, rpl19, rps14, rps19, rps27.1, rps21, rps26l, rpl7a, rps16, rpl10a, rpl37, rps24, rpl15, rps13, larp7, rps15a, rpl12, rpl7, rpl17, rpl8, rps6, rpl4	350	200	15208	8.25577	3.91e-21	1.95e-21	1.88e-21
3	2	3.54507	GOTERM_CC_DIRECT	GO:0005852~eukaryotic translation initiation factor 3 complex	6	1.222	4.14e-05	ENSDARG00000059654, ENSDARG00000017445, ENSDARG00000090697, ENSDARG00000077533, ENSDARG00000068289, ENSDARG00000013931	eif3ba, eif3i, eif3ea, eif3f, eif3k, eif3m	350	18	15208	14.4838	0.00528877	0.000884	0.000849
3	2	3.54507	GOTERM_CC_DIRECT	GO:0016282~eukaryotic 43S preinitiation complex	5	1.01833	0.000399	ENSDARG00000059654, ENSDARG00000017445, ENSDARG00000090697, ENSDARG00000068289, ENSDARG00000013931	eif3ba, eif3i, eif3ea, eif3k, eif3m	350	16	15208	13.5786	0.0497661	0.00729099	0.00700619
3	3	3.40694	GOTERM_CC_DIRECT	GO:0005852~eukaryotic translation initiation factor 3 complex	6	1.222	4.14e-05	ENSDARG00000059654, ENSDARG00000017445, ENSDARG00000090697, ENSDARG00000077533, ENSDARG00000068289, ENSDARG00000013931	eif3ba, eif3i, eif3ea, eif3f, eif3k, eif3m	350	18	15208	14.4838	0.00528877	0.000884	0.000849
4	2	1.97877	PIR_SUPERFAMILY	PIRSF002285:Op18/stathmin	3	1.2	0.00188282	ENSDARG00000033234, ENSDARG00000070537, ENSDARG00000030106	stmn2a, stmn2b, stmn4	18	7	1717	40.881	0.0297035	0.0301252	0.0301252
5	1	8.29258	INTERPRO	IPR008160:Collagen triple helix repeat	11	7.14286	7.88e-10	ENSDARG00000035809, ENSDARG00000003533, ENSDARG00000074908, ENSDARG00000009014, ENSDARG00000012405, ENSDARG00000021720, ENSDARG00000052063, ENSDARG00000078322, ENSDARG00000055175, ENSDARG00000020007, ENSDARG00000087198	col1a1b, col8a1b, col6a1, col11a1b, col1a1a, COL7A1, col4a5, col12a1a, c1qtnf6a, col1a2, cthrc1a	143	95	21293	17.2413	2.58e-07	2.58e-07	2.54e-07
5	1	8.29258	UP_KEYWORDS	Collagen	9	5.84416	1.3e-08	ENSDARG00000035809, ENSDARG00000003533, ENSDARG00000009014, ENSDARG00000012405, ENSDARG00000052063, ENSDARG00000078322, ENSDARG00000055175, ENSDARG00000020007, ENSDARG00000087198	col1a1b, col8a1b, col11a1b, col1a1a, col4a5, col12a1a, c1qtnf6a, col1a2, cthrc1a	148	67	22487	20.4097	1.06e-06	5.32e-07	5.25e-07
5	1	8.29258	GOTERM_CC_DIRECT	GO:0005581~collagen trimer	9	5.84416	1.3e-08	ENSDARG00000035809, ENSDARG00000003533, ENSDARG00000009014, ENSDARG00000012405, ENSDARG00000052063, ENSDARG00000078322, ENSDARG00000055175, ENSDARG00000020007, ENSDARG00000087198	col1a1b, col8a1b, col11a1b, col1a1a, col4a5, col12a1a, c1qtnf6a, col1a2, cthrc1a	100	68	15208	20.1282	5.32e-07	5.32e-07	5.32e-07
8	1	3.51414	GOTERM_BP_DIRECT	GO:0019882~antigen processing and presentation	5	9.43396	6.62e-06	ENSDARG00000079105, ENSDARG00000092731, ENSDARG00000075963, ENSDARG00000036628, ENSDARG00000031745	mhc2dab, mhc1uca, mhc1uba, cd74b, si:busm1-266f07.2	29	66	14912	38.9551	0.000436	0.000437	0.000437

## Sheet: clust1__216_DAVID_IDs_High
Annotation Cluster 1	Enrichment Score: 2.302891316420942
Category	Term	Count	%	PValue	Genes	List Total	Pop Hits	Pop Total	Fold Enrichment	Bonferroni	Benjamini	FDR
GOTERM_CC_DIRECT	GO:0016020~membrane	77	35.6481	0.00184367	ENSDARG00000075189, ENSDARG00000052782, ENSDARG00000029402, ENSDARG00000001835, ENSDARG00000090145, ENSDARG00000043479, ENSDARG00000077047, ENSDARG00000020798, ENSDARG00000063006, ENSDARG00000055093, ENSDARG00000059388, ENSDARG00000058730, ENSDARG00000061940, ENSDARG00000008100, ENSDARG00000068731, ENSDARG00000075858, ENSDARG00000019328, ENSDARG00000011600, ENSDARG00000089276, ENSDARG00000074389,…	144	6207	15208	1.31014	0.119558	0.127214	0.127214
UP_KEYWORDS	Membrane	78	36.1111	0.00442861	ENSDARG00000075189, ENSDARG00000052782, ENSDARG00000029402, ENSDARG00000001835, ENSDARG00000090145, ENSDARG00000043479, ENSDARG00000077047, ENSDARG00000090064, ENSDARG00000063006, ENSDARG00000055093, ENSDARG00000059388, ENSDARG00000058730, ENSDARG00000061940, ENSDARG00000008100, ENSDARG00000068731, ENSDARG00000075858, ENSDARG00000019328, ENSDARG00000011600, ENSDARG00000089276, ENSDARG00000068296,…	209	6398	22487	1.3117	0.383558	0.160906	0.157954
UP_KEYWORDS	Transmembrane	74	34.2593	0.00598492	ENSDARG00000075189, ENSDARG00000052782, ENSDARG00000029402, ENSDARG00000001835, ENSDARG00000090145, ENSDARG00000043479, ENSDARG00000077047, ENSDARG00000090064, ENSDARG00000063006, ENSDARG00000055093, ENSDARG00000059388, ENSDARG00000058730, ENSDARG00000061940, ENSDARG00000008100, ENSDARG00000068731, ENSDARG00000075858, ENSDARG00000019328, ENSDARG00000011600, ENSDARG00000089276, ENSDARG00000068296,…	209	6068	22487	1.31211	0.480203	0.163089	0.160097
GOTERM_CC_DIRECT	GO:0016021~integral component of membrane	74	34.2593	0.00728949	ENSDARG00000075189, ENSDARG00000052782, ENSDARG00000029402, ENSDARG00000001835, ENSDARG00000090145, ENSDARG00000043479, ENSDARG00000077047, ENSDARG00000090064, ENSDARG00000063006, ENSDARG00000055093, ENSDARG00000059388, ENSDARG00000058730, ENSDARG00000061940, ENSDARG00000008100, ENSDARG00000068731, ENSDARG00000075858, ENSDARG00000019328, ENSDARG00000011600, ENSDARG00000089276, ENSDARG00000074389,…	144	6180	15208	1.2646	0.396384	0.251487	0.251487
UP_KEYWORDS	Transmembrane helix	73	33.7963	0.00858689	ENSDARG00000075189, ENSDARG00000052782, ENSDARG00000029402, ENSDARG00000001835, ENSDARG00000090145, ENSDARG00000043479, ENSDARG00000077047, ENSDARG00000090064, ENSDARG00000063006, ENSDARG00000055093, ENSDARG00000059388, ENSDARG00000058730, ENSDARG00000061940, ENSDARG00000008100, ENSDARG00000068731, ENSDARG00000075858, ENSDARG00000019328, ENSDARG00000011600, ENSDARG00000089276, ENSDARG00000068296,…	209	6055	22487	1.29716	0.609377	0.187194	0.183759
Annotation Cluster 2	Enrichment Score: 1.6812604988613182
Category	Term	Count	%	PValue	Genes	List Total	Pop Hits	Pop Total	Fold Enrichment	Bonferroni	Benjamini	FDR
INTERPRO	IPR000595:Cyclic nucleotide-binding domain	4	1.85185	0.0106614	ENSDARG00000061990, ENSDARG00000009477, ENSDARG00000043220, ENSDARG00000074309	195	50	21293	8.73559	0.99482	0.829074	0.829074
INTERPRO	IPR018490:Cyclic nucleotide-binding-like	4	1.85185	0.0124923	ENSDARG00000061990, ENSDARG00000009477, ENSDARG00000043220, ENSDARG00000074309	195	53	21293	8.24112	0.997914	0.829074	0.829074
INTERPRO	IPR014710:RmlC-like jelly roll fold	4	1.85185	0.0190064	ENSDARG00000061990, ENSDARG00000009477, ENSDARG00000043220, ENSDARG00000074309	195	62	21293	7.04483	0.999919	0.848377	0.848377
SMART	SM00100:cNMP	3	1.38889	0.0744045	ENSDARG00000061990, ENSDARG00000009477, ENSDARG00000043220	115	48	12157	6.60707	0.999978	1	1
Annotation Cluster 3	Enrichment Score: 1.6770253981993535
Category	Term	Count	%	PValue	Genes	List Total	Pop Hits	Pop Total	Fold Enrichment	Bonferroni	Benjamini	FDR
INTERPRO	IPR018000:Neurotransmitter-gated ion-channel, conserved site	4	1.85185	0.0144923	ENSDARG00000059891, ENSDARG00000011113, ENSDARG00000052782, ENSDARG00000059763	195	56	21293	7.79963	0.999229	0.829074	0.829074
INTERPRO	IPR006029:Neurotransmitter-gated ion-channel transmembrane domain	4	1.85185	0.0144923	ENSDARG00000059891, ENSDARG00000011113, ENSDARG00000052782, ENSDARG00000059763	195	56	21293	7.79963	0.999229	0.829074	0.829074
INTERPRO	IPR006201:Neurotransmitter-gated ion-channel	4	1.85185	0.0151969	ENSDARG00000059891, ENSDARG00000011113, ENSDARG00000052782, ENSDARG00000059763	195	57	21293	7.6628	0.999457	0.829074	0.829074
INTERPRO	IPR006202:Neurotransmitter-gated ion-channel ligand-binding	4	1.85185	0.0151969	ENSDARG00000059891, ENSDARG00000011113, ENSDARG00000052782, ENSDARG00000059763	195	57	21293	7.6628	0.999457	0.829074	0.829074
GOTERM_MF_DIRECT	GO:0005230~extracellular ligand-gated ion channel activity	3	1.38889	0.0849353	ENSDARG00000011113, ENSDARG00000052782, ENSDARG00000059763	138	56	15797	6.13238	1	1	1
Annotation Cluster 4	Enrichment Score: 1.6250577528831784
Category	Term	Count	%	PValue	Genes	List Total	Pop Hits	Pop Total	Fold Enrichment	Bonferroni	Benjamini	FDR
GOTERM_MF_DIRECT	GO:0016247~channel regulator activity	3	1.38889	0.00465522	ENSDARG00000063006, ENSDARG00000020450, ENSDARG00000070624	138	12	15797	28.6178	0.64838	1	1
GOTERM_BP_DIRECT	GO:2000311~regulation of alpha-amino-3-hydroxy-5-methyl-4-isoxazole propionate selective glutamate receptor activity	3	1.38889	0.00597064	ENSDARG00000063006, ENSDARG00000020450, ENSDARG00000070624	148	12	14912	25.1892	0.864688	0.332366	0.331371
GOTERM_BP_DIRECT	GO:0019226~transmission of nerve impulse	3	1.38889	0.00597064	ENSDARG00000063006, ENSDARG00000020450, ENSDARG00000070624	148	12	14912	25.1892	0.864688	0.332366	0.331371
INTERPRO	IPR008368:Voltage-dependent calcium channel, gamma subunit	3	1.38889	0.00699273	ENSDARG00000063006, ENSDARG00000020450, ENSDARG00000070624	195	14	21293	23.3989	0.968111	0.829074	0.829074
UP_KEYWORDS	Calcium transport	4	1.85185	0.0117268	ENSDARG00000063006, ENSDARG00000020450, ENSDARG00000063433, ENSDARG00000070624	209	51	22487	8.43869	0.723563	0.213036	0.209127
GOTERM_CC_DIRECT	GO:0032281~AMPA glutamate receptor complex	3	1.38889	0.0164021	ENSDARG00000063006, ENSDARG00000020450, ENSDARG00000070624	144	21	15208	15.0873	0.680542	0.377248	0.377248
GOTERM_MF_DIRECT	GO:0005262~calcium channel activity	4	1.85185	0.0246467	ENSDARG00000063006, ENSDARG00000061203, ENSDARG00000020450, ENSDARG00000070624	138	72	15797	6.3595	0.996265	1	1
UP_KEYWORDS	Calcium channel	3	1.38889	0.0393547	ENSDARG00000063006, ENSDARG00000020450, ENSDARG00000070624	209	34	22487	9.49353	0.987429	0.536208	0.526369
INTERPRO	IPR004031:PMP-22/EMP/MP20/Claudin	4	1.85185	0.0505155	ENSDARG00000063006, ENSDARG00000020450, ENSDARG00000070624, ENSDARG00000089276	195	91	21293	4.79977	1	1	1
GOTERM_MF_DIRECT	GO:0005245~voltage-gated calcium channel activity	3	1.38889	0.0513092	ENSDARG00000063006, ENSDARG00000020450, ENSDARG00000070624	138	42	15797	8.1765	0.999992	1	1
GOTERM_MF_DIRECT	GO:0005244~voltage-gated ion channel activity	4	1.85185	0.0632145	ENSDARG00000063006, ENSDARG00000020450, ENSDARG00000001835, ENSDARG00000070624	138	105	15797	4.3608	1	1	1
GOTERM_BP_DIRECT	GO:0034765~regulation of ion transmembrane transport	4	1.85185	0.077957	ENSDARG00000063006, ENSDARG00000020450, ENSDARG00000001835, ENSDARG00000070624	148	101	14912	3.99037	1	1	1
UP_KEYWORDS	Voltage-gated channel	3	1.38889	0.270704	ENSDARG00000063006, ENSDARG00000020450, ENSDARG00000070624	209	110	22487	2.93436	1	1	0.990741
Annotation Cluster 5	Enrichment Score: 1.022255420648491
Category	Term	Count	%	PValue	Genes	List Total	Pop Hits	Pop Total	Fold Enrichment	Bonferroni	Benjamini	FDR
INTERPRO	IPR023415:Low-density lipoprotein (LDL) receptor class A, conserved site	3	1.38889	0.0761237	ENSDARG00000071596, ENSDARG00000068731, ENSDARG00000012467	195	50	21293	6.55169	1	1	1
SMART	SM00192:LDLa	3	1.38889	0.102755	ENSDARG00000071596, ENSDARG00000068731, ENSDARG00000012467	115	58	12157	5.46792	1	1	1
INTERPRO	IPR002172:Low-density lipoprotein (LDL) receptor class A repeat	3	1.38889	0.109625	ENSDARG00000071596, ENSDARG00000068731, ENSDARG00000012467	195	62	21293	5.28362	1	1	1
Annotation Cluster 6	Enrichment Score: 0.8028094213554581
Category	Term	Count	%	PValue	Genes	List Total	Pop Hits	Pop Total	Fold Enrichment	Bonferroni	Benjamini	FDR
GOTERM_CC_DIRECT	GO:0045202~synapse	5	2.31481	0.0531534	ENSDARG00000059891, ENSDARG00000011113, ENSDARG00000059763, ENSDARG00000020609, ENSDARG00000052604	144	150	15208	3.52037	0.976917	0.611264	0.611264
UP_KEYWORDS	Synapse	4	1.85185	0.0892659	ENSDARG00000059891, ENSDARG00000011113, ENSDARG00000059763, ENSDARG00000020609	209	114	22487	3.7752	0.999963	0.912891	0.89614
GOTERM_CC_DIRECT	GO:0030054~cell junction	4	1.85185	0.357521	ENSDARG00000059891, ENSDARG00000011113, ENSDARG00000059763, ENSDARG00000020609	144	226	15208	1.86922	1	1	1
UP_KEYWORDS	Cell junction	4	1.85185	0.362447	ENSDARG00000059891, ENSDARG00000011113, ENSDARG00000059763, ENSDARG00000020609	209	230	22487	1.87119	1	1	0.990741
Annotation Cluster 7	Enrichment Score: 0.725094928967217
Category	Term	Count	%	PValue	Genes	List Total	Pop Hits	Pop Total	Fold Enrichment	Bonferroni	Benjamini	FDR
SMART	SM00054:EFh	5	2.31481	0.0960443	ENSDARG00000002576, ENSDARG00000055229, ENSDARG00000000161, ENSDARG00000070491, ENSDARG00000023228	115	185	12157	2.85711	0.999999	1	1
INTERPRO	IPR011992:EF-hand-like domain	6	2.77778	0.170656	ENSDARG00000002576, ENSDARG00000055229, ENSDARG00000000161, ENSDARG00000075393, ENSDARG00000070491, ENSDARG00000023228	195	321	21293	2.04103	1	1	1
INTERPRO	IPR002048:EF-hand domain	5	2.31481	0.230795	ENSDARG00000002576, ENSDARG00000055229, ENSDARG00000000161, ENSDARG00000070491, ENSDARG00000023228	195	269	21293	2.02964	1	1	1
INTERPRO	IPR018247:EF-Hand 1, calcium-binding site	4	1.85185	0.332507	ENSDARG00000002576, ENSDARG00000055229, ENSDARG00000070491, ENSDARG00000023228	195	223	21293	1.95865	1	1	1
Annotation Cluster 8	Enrichment Score: 0.6518304414263931
Category	Term	Count	%	PValue	Genes	List Total	Pop Hits	Pop Total	Fold Enrichment	Bonferroni	Benjamini	FDR
UP_KEYWORDS	ANK repeat	5	2.31481	0.213452	ENSDARG00000061203, ENSDARG00000074777, ENSDARG00000063255, ENSDARG00000054213, ENSDARG00000061736	209	256	22487	2.10143	1	1	0.990741
INTERPRO	IPR002110:Ankyrin repeat	5	2.31481	0.218179	ENSDARG00000061203, ENSDARG00000074777, ENSDARG00000063255, ENSDARG00000054213, ENSDARG00000061736	195	263	21293	2.07595	1	1	1
SMART	SM00248:ANK	5	2.31481	0.225396	ENSDARG00000061203, ENSDARG00000074777, ENSDARG00000063255, ENSDARG00000054213, ENSDARG00000061736	115	259	12157	2.04079	1	1	1
INTERPRO	IPR020683:Ankyrin repeat-containing domain	5	2.31481	0.235298	ENSDARG00000061203, ENSDARG00000074777, ENSDARG00000063255, ENSDARG00000054213, ENSDARG00000061736	195	271	21293	2.01467	1	1	1
Annotation Cluster 9	Enrichment Score: 0.5684668015899373
Category	Term	Count	%	PValue	Genes	List Total	Pop Hits	Pop Total	Fold Enrichment	Bonferroni	Benjamini	FDR
UP_KEYWORDS	Protein phosphatase	3	1.38889	0.202513	ENSDARG00000043250, ENSDARG00000077047, ENSDARG00000019307	209	90	22487	3.58644	1	1	0.990741
GOTERM_MF_DIRECT	GO:0004721~phosphoprotein phosphatase activity	3	1.38889	0.250381	ENSDARG00000043250, ENSDARG00000077047, ENSDARG00000019307	138	111	15797	3.09381	1	1	1
GOTERM_BP_DIRECT	GO:0006470~protein dephosphorylation	3	1.38889	0.388639	ENSDARG00000043250, ENSDARG00000077047, ENSDARG00000019307	148	136	14912	2.22258	1	1	1
Annotation Cluster 10	Enrichment Score: 0.5654969908254313
Category	Term	Count	%	PValue	Genes	List Total	Pop Hits	Pop Total	Fold Enrichment	Bonferroni	Benjamini	FDR
GOTERM_MF_DIRECT	GO:0016301~kinase activity	9	4.16667	0.21574	ENSDARG00000007825, ENSDARG00000001929, ENSDARG00000009477, ENSDARG00000063157, ENSDARG00000011065, ENSDARG00000039241, ENSDARG00000025855, ENSDARG00000018856, ENSDARG00000011600	138	661	15797	1.55861	1	1	1
UP_KEYWORDS	Kinase	9	4.16667	0.293915	ENSDARG00000007825, ENSDARG00000001929, ENSDARG00000009477, ENSDARG00000063157, ENSDARG00000011065, ENSDARG00000039241, ENSDARG00000025855, ENSDARG00000018856, ENSDARG00000011600	209	679	22487	1.42613	1	1	0.990741
GOTERM_BP_DIRECT	GO:0016310~phosphorylation	9	4.16667	0.317218	ENSDARG00000007825, ENSDARG00000001929, ENSDARG00000009477, ENSDARG00000063157, ENSDARG00000011065, ENSDARG00000039241, ENSDARG00000025855, ENSDARG00000018856, ENSDARG00000011600	148	654	14912	1.38656	1	1	1
Annotation Cluster 11	Enrichment Score: 0.3313118331737937
Category	Term	Count	%	PValue	Genes	List Total	Pop Hits	Pop Total	Fold Enrichment	Bonferroni	Benjamini	FDR
SMART	SM00326:SH3	4	1.85185	0.434516	ENSDARG00000074059, ENSDARG00000003046, ENSDARG00000000161, ENSDARG00000063157	115	257	12157	1.64534	1	1	1
INTERPRO	IPR001452:Src homology-3 domain	4	1.85185	0.473546	ENSDARG00000074059, ENSDARG00000003046, ENSDARG00000000161, ENSDARG00000063157	195	281	21293	1.55438	1	1	1
UP_KEYWORDS	SH3 domain	3	1.38889	0.492829	ENSDARG00000074059, ENSDARG00000003046, ENSDARG00000000161	209	177	22487	1.82362	1	1	0.990741
Annotation Cluster 12	Enrichment Score: 0.33089113438897577
Category	Term	Count	%	PValue	Genes	List Total	Pop Hits	Pop Total	Fold Enrichment	Bonferroni	Benjamini	FDR
GOTERM_MF_DIRECT	GO:0004672~protein kinase activity	9	4.16667	0.293532	ENSDARG00000076776, ENSDARG00000007825, ENSDARG00000079470, ENSDARG00000001929, ENSDARG00000011065, ENSDARG00000095833, ENSDARG00000039241, ENSDARG00000018856, ENSDARG00000011600	138	725	15797	1.42102	1	1	1
INTERPRO	IPR000719:Protein kinase, catalytic domain	9	4.16667	0.355129	ENSDARG00000076776, ENSDARG00000007825, ENSDARG00000079470, ENSDARG00000001929, ENSDARG00000011065, ENSDARG00000095833, ENSDARG00000039241, ENSDARG00000018856, ENSDARG00000011600	195	735	21293	1.33708	1	1	1
INTERPRO	IPR011009:Protein kinase-like domain	9	4.16667	0.418878	ENSDARG00000076776, ENSDARG00000007825, ENSDARG00000079470, ENSDARG00000001929, ENSDARG00000011065, ENSDARG00000095833, ENSDARG00000039241, ENSDARG00000018856, ENSDARG00000011600	195	781	21293	1.25833	1	1	1
INTERPRO	IPR017441:Protein kinase, ATP binding site	7	3.24074	0.449206	ENSDARG00000007825, ENSDARG00000079470, ENSDARG00000011065, ENSDARG00000095833, ENSDARG00000039241, ENSDARG00000018856, ENSDARG00000011600	195	589	21293	1.29773	1	1	1
GOTERM_BP_DIRECT	GO:0006468~protein phosphorylation	8	3.7037	0.571007	ENSDARG00000076776, ENSDARG00000007825, ENSDARG00000001929, ENSDARG00000011065, ENSDARG00000095833, ENSDARG00000039241, ENSDARG00000018856, ENSDARG00000011600	148	721	14912	1.11797	1	1	1
GOTERM_MF_DIRECT	GO:0005524~ATP binding	11	5.09259	0.923501	ENSDARG00000076776, ENSDARG00000007825, ENSDARG00000079470, ENSDARG00000008904, ENSDARG00000001929, ENSDARG00000011065, ENSDARG00000095833, ENSDARG00000063433, ENSDARG00000039241, ENSDARG00000018856, ENSDARG00000011600	138	1668	15797	0.754905	1	1	1
Annotation Cluster 13	Enrichment Score: 0.25758523095897257
Category	Term	Count	%	PValue	Genes	List Total	Pop Hits	Pop Total	Fold Enrichment	Bonferroni	Benjamini	FDR
INTERPRO	IPR008271:Serine/threonine-protein kinase, active site	6	2.77778	0.476013	ENSDARG00000007825, ENSDARG00000079470, ENSDARG00000001929, ENSDARG00000011065, ENSDARG00000039241, ENSDARG00000018856	195	500	21293	1.31034	1	1	1
SMART	SM00220:S_TKc	6	2.77778	0.592167	ENSDARG00000007825, ENSDARG00000079470, ENSDARG00000001929, ENSDARG00000011065, ENSDARG00000039241, ENSDARG00000018856	115	550	12157	1.15323	1	1	1
GOTERM_MF_DIRECT	GO:0004674~protein serine/threonine kinase activity	5	2.31481	0.598662	ENSDARG00000007825, ENSDARG00000001929, ENSDARG00000011065, ENSDARG00000039241, ENSDARG00000018856	138	478	15797	1.1974	1	1	1
Annotation Cluster 14	Enrichment Score: 0.20609865848434397
Category	Term	Count	%	PValue	Genes	List Total	Pop Hits	Pop Total	Fold Enrichment	Bonferroni	Benjamini	FDR
UP_KEYWORDS	Leucine-rich repeat	3	1.38889	0.480684	ENSDARG00000061791, ENSDARG00000068731, ENSDARG00000004246	209	173	22487	1.86578	1	1	0.990741
INTERPRO	IPR003591:Leucine-rich repeat, typical subtype	3	1.38889	0.585513	ENSDARG00000061791, ENSDARG00000068731, ENSDARG00000004246	195	214	21293	1.53077	1	1	1
SMART	SM00369:LRR_TYP	3	1.38889	0.599496	ENSDARG00000061791, ENSDARG00000068731, ENSDARG00000004246	115	214	12157	1.48196	1	1	1
INTERPRO	IPR001611:Leucine-rich repeat	3	1.38889	0.888019	ENSDARG00000061791, ENSDARG00000068731, ENSDARG00000004246	195	407	21293	0.804876	1	1	1
Annotation Cluster 15	Enrichment Score: 0.05584450170881801
Category	Term	Count	%	PValue	Genes	List Total	Pop Hits	Pop Total	Fold Enrichment	Bonferroni	Benjamini	FDR
SMART	SM01381:SM01381	3	1.38889	0.661924	ENSDARG00000069806, ENSDARG00000061940, ENSDARG00000053929	115	240	12157	1.32141	1	1	1
UP_KEYWORDS	G-protein coupled receptor	4	1.85185	0.94946	ENSDARG00000069806, ENSDARG00000025478, ENSDARG00000061940, ENSDARG00000053929	209	670	22487	0.642348	1	1	0.990741
UP_KEYWORDS	Transducer	4	1.85185	0.963961	ENSDARG00000069806, ENSDARG00000025478, ENSDARG00000061940, ENSDARG00000053929	209	718	22487	0.599406	1	1	0.990741
GOTERM_MF_DIRECT	GO:0004871~signal transducer activity	3	1.38889	0.98691	ENSDARG00000025478, ENSDARG00000061940, ENSDARG00000053929	138	713	15797	0.481645	1	1	1
Annotation Cluster 16	Enrichment Score: 0.05214952677100013
Category	Term	Count	%	PValue	Genes	List Total	Pop Hits	Pop Total	Fold Enrichment	Bonferroni	Benjamini	FDR
UP_KEYWORDS	Transcription regulation	5	2.31481	0.843178	ENSDARG00000011696, ENSDARG00000025032, ENSDARG00000037421, ENSDARG00000055752, ENSDARG00000038858	209	636	22487	0.845859	1	1	0.990741
UP_KEYWORDS	Transcription	5	2.31481	0.87927	ENSDARG00000011696, ENSDARG00000025032, ENSDARG00000037421, ENSDARG00000055752, ENSDARG00000038858	209	682	22487	0.788807	1	1	0.990741
GOTERM_BP_DIRECT	GO:0006351~transcription, DNA-templated	5	2.31481	0.940828	ENSDARG00000011696, ENSDARG00000025032, ENSDARG00000037421, ENSDARG00000055752, ENSDARG00000038858	148	747	14912	0.674409	1	1	1
Annotation Cluster 17	Enrichment Score: 0.025500640630996455
Category	Term	Count	%	PValue	Genes	List Total	Pop Hits	Pop Total	Fold Enrichment	Bonferroni	Benjamini	FDR
INTERPRO	IPR003599:Immunoglobulin subtype	4	1.85185	0.917502	ENSDARG00000035891, ENSDARG00000077940, ENSDARG00000006396, ENSDARG00000024017	195	607	21293	0.719571	1	1	1
SMART	SM00409:IG	4	1.85185	0.928763	ENSDARG00000035891, ENSDARG00000077940, ENSDARG00000006396, ENSDARG00000024017	115	607	12157	0.696626	1	1	1
INTERPRO	IPR007110:Immunoglobulin-like domain	4	1.85185	0.983979	ENSDARG00000035891, ENSDARG00000077940, ENSDARG00000006396, ENSDARG00000024017	195	841	21293	0.519357	1	1	1
Annotation Cluster 18	Enrichment Score: 0.003582978203919374
Category	Term	Count	%	PValue	Genes	List Total	Pop Hits	Pop Total	Fold Enrichment	Bonferroni	Benjamini	FDR
INTERPRO	IPR007087:Zinc finger, C2H2	4	1.85185	0.984097	ENSDARG00000071055, ENSDARG00000077400, ENSDARG00000037421, ENSDARG00000070864	195	842	21293	0.51874	1	1	1
INTERPRO	IPR015880:Zinc finger, C2H2-like	3	1.38889	0.995042	ENSDARG00000071055, ENSDARG00000037421, ENSDARG00000070864	195	800	21293	0.409481	1	1	1
SMART	SM00355:ZnF_C2H2	3	1.38889	0.996258	ENSDARG00000071055, ENSDARG00000037421, ENSDARG00000070864	115	800	12157	0.396424	1	1	1

## Sheet: clust2__808_DAVID_IDs_High
Annotation Cluster 1	Enrichment Score: 12.086601239240526
Category	Term	Count	%	PValue	Genes	List Total	Pop Hits	Pop Total	Fold Enrichment	Bonferroni	Benjamini	FDR
GOTERM_CC_DIRECT	GO:0005840~ribosome	34	4.20792	1.03913e-15	ENSDARG00000056903, ENSDARG00000053457, ENSDARG00000021864, ENSDARG00000019181, ENSDARG00000041811, ENSDARG00000058451, ENSDARG00000021838, ENSDARG00000070849, ENSDARG00000035692, ENSDARG00000011201, ENSDARG00000043509, ENSDARG00000008068, ENSDARG00000042566, ENSDARG00000011405, ENSDARG00000025581, ENSDARG00000010516, ENSDARG00000077717, ENSDARG00000032725, ENSDARG00000046157, ENSDARG00000005827,…	571	162	15208	5.58985	2.70783e-13	1.40803e-13	1.26255e-13
UP_KEYWORDS	Ribosomal protein	26	3.21782	7.10481e-13	ENSDARG00000056903, ENSDARG00000053457, ENSDARG00000021864, ENSDARG00000019181, ENSDARG00000041811, ENSDARG00000058451, ENSDARG00000021838, ENSDARG00000070849, ENSDARG00000035692, ENSDARG00000011201, ENSDARG00000043509, ENSDARG00000042566, ENSDARG00000011405, ENSDARG00000025581, ENSDARG00000010516, ENSDARG00000051783, ENSDARG00000006413, ENSDARG00000006316, ENSDARG00000077291, ENSDARG00000036875,…	794	121	22487	6.08554	1.51322e-10	7.56662e-11	6.85614e-11
KEGG_PATHWAY	dre03010:Ribosome	31	3.83663	1.11549e-11	ENSDARG00000056903, ENSDARG00000053457, ENSDARG00000021864, ENSDARG00000019181, ENSDARG00000041811, ENSDARG00000058451, ENSDARG00000021838, ENSDARG00000070849, ENSDARG00000035692, ENSDARG00000011201, ENSDARG00000043509, ENSDARG00000042566, ENSDARG00000011405, ENSDARG00000025581, ENSDARG00000010516, ENSDARG00000077717, ENSDARG00000032725, ENSDARG00000046157, ENSDARG00000051783, ENSDARG00000006413,…	294	134	5405	4.2531	1.3386e-09	1.33859e-09	1.27166e-09
GOTERM_MF_DIRECT	GO:0003735~structural constituent of ribosome	31	3.83663	5.46895e-11	ENSDARG00000056903, ENSDARG00000053457, ENSDARG00000021864, ENSDARG00000019181, ENSDARG00000058451, ENSDARG00000021838, ENSDARG00000070849, ENSDARG00000007130, ENSDARG00000035692, ENSDARG00000011201, ENSDARG00000043509, ENSDARG00000042566, ENSDARG00000011405, ENSDARG00000025581, ENSDARG00000010516, ENSDARG00000077717, ENSDARG00000032725, ENSDARG00000046157, ENSDARG00000051783, ENSDARG00000006413,…	549	212	15797	4.20754	3.49466e-08	3.49466e-08	3.45637e-08
Annotation Cluster 2	Enrichment Score: 4.44209582829981
Category	Term	Count	%	PValue	Genes	List Total	Pop Hits	Pop Total	Fold Enrichment	Bonferroni	Benjamini	FDR
INTERPRO	IPR002194:Chaperonin TCP-1, conserved site	6	0.742574	2.53333e-06	ENSDARG00000013475, ENSDARG00000021252, ENSDARG00000008243, ENSDARG00000045399, ENSDARG00000017891, ENSDARG00000016173	739	8	21293	21.6099	0.00338639	0.00169607	0.00168973
INTERPRO	IPR027410:TCP-1-like chaperonin intermediate domain	6	0.742574	5.53684e-06	ENSDARG00000013475, ENSDARG00000021252, ENSDARG00000008243, ENSDARG00000045399, ENSDARG00000017891, ENSDARG00000016173	739	9	21293	19.2088	0.00738644	0.00185346	0.00184654
INTERPRO	IPR017998:Chaperone tailless complex polypeptide 1 (TCP-1)	6	0.742574	5.53684e-06	ENSDARG00000013475, ENSDARG00000021252, ENSDARG00000008243, ENSDARG00000045399, ENSDARG00000017891, ENSDARG00000016173	739	9	21293	19.2088	0.00738644	0.00185346	0.00184654
INTERPRO	IPR027409:GroEL-like apical domain	6	0.742574	3.19038e-05	ENSDARG00000013475, ENSDARG00000021252, ENSDARG00000008243, ENSDARG00000045399, ENSDARG00000017891, ENSDARG00000016173	739	12	21293	14.4066	0.0418202	0.00610274	0.00607995
INTERPRO	IPR027413:GroEL-like equatorial domain	6	0.742574	3.19038e-05	ENSDARG00000013475, ENSDARG00000021252, ENSDARG00000008243, ENSDARG00000045399, ENSDARG00000017891, ENSDARG00000016173	739	12	21293	14.4066	0.0418202	0.00610274	0.00607995
INTERPRO	IPR002423:Chaperonin Cpn60/TCP-1	6	0.742574	5.03646e-05	ENSDARG00000013475, ENSDARG00000021252, ENSDARG00000008243, ENSDARG00000045399, ENSDARG00000017891, ENSDARG00000016173	739	13	21293	13.2984	0.0652161	0.00842977	0.00839829
GOTERM_MF_DIRECT	GO:0051082~unfolded protein binding	7	0.866337	0.0201978	ENSDARG00000013475, ENSDARG00000021252, ENSDARG00000008243, ENSDARG00000045399, ENSDARG00000017891, ENSDARG00000061228, ENSDARG00000016173	549	62	15797	3.24869	0.999998	0.435034	0.430268
Annotation Cluster 3	Enrichment Score: 3.545220694912345
Category	Term	Count	%	PValue	Genes	List Total	Pop Hits	Pop Total	Fold Enrichment	Bonferroni	Benjamini	FDR
INTERPRO	IPR019821:Kinesin, motor region, conserved site	10	1.23762	2.39618e-05	ENSDARG00000044491, ENSDARG00000062187, ENSDARG00000010948, ENSDARG00000040110, ENSDARG00000076228, ENSDARG00000008022, ENSDARG00000005462, ENSDARG00000071009, ENSDARG00000063385, ENSDARG00000014943	739	46	21293	6.26375	0.031576	0.00610274	0.00607995
SMART	SM00129:KISc	10	1.23762	3.6266e-05	ENSDARG00000044491, ENSDARG00000062187, ENSDARG00000010948, ENSDARG00000040110, ENSDARG00000076228, ENSDARG00000008022, ENSDARG00000005462, ENSDARG00000071009, ENSDARG00000063385, ENSDARG00000014943	392	52	12157	5.96399	0.0100315	0.010082	0.010082
INTERPRO	IPR001752:Kinesin, motor domain	10	1.23762	7.76302e-05	ENSDARG00000044491, ENSDARG00000062187, ENSDARG00000010948, ENSDARG00000040110, ENSDARG00000076228, ENSDARG00000008022, ENSDARG00000005462, ENSDARG00000071009, ENSDARG00000063385, ENSDARG00000014943	739	53	21293	5.43646	0.0987304	0.0115496	0.0115065
GOTERM_MF_DIRECT	GO:0003777~microtubule motor activity	10	1.23762	0.00134796	ENSDARG00000044491, ENSDARG00000062187, ENSDARG00000010948, ENSDARG00000040110, ENSDARG00000076228, ENSDARG00000008022, ENSDARG00000005462, ENSDARG00000071009, ENSDARG00000063385, ENSDARG00000014943	549	77	15797	3.7369	0.577654	0.0861348	0.0851913
GOTERM_CC_DIRECT	GO:0005871~kinesin complex	9	1.11386	0.00152463	ENSDARG00000044491, ENSDARG00000062187, ENSDARG00000010948, ENSDARG00000076228, ENSDARG00000008022, ENSDARG00000005462, ENSDARG00000071009, ENSDARG00000063385, ENSDARG00000014943	571	59	15208	4.06281	0.338662	0.0231502	0.0207583
GOTERM_BP_DIRECT	GO:0007018~microtubule-based movement	10	1.23762	0.00386173	ENSDARG00000044491, ENSDARG00000062187, ENSDARG00000010948, ENSDARG00000040110, ENSDARG00000076228, ENSDARG00000008022, ENSDARG00000005462, ENSDARG00000071009, ENSDARG00000063385, ENSDARG00000014943	590	79	14912	3.19931	0.977878	0.131166	0.128369
Annotation Cluster 4	Enrichment Score: 2.616437329230349
Category	Term	Count	%	PValue	Genes	List Total	Pop Hits	Pop Total	Fold Enrichment	Bonferroni	Benjamini	FDR
GOTERM_CC_DIRECT	GO:0005682~U5 snRNP	5	0.618812	0.000760022	ENSDARG00000033175, ENSDARG00000040440, ENSDARG00000011648, ENSDARG00000013800, ENSDARG00000011125	571	12	15208	11.0975	0.186203	0.0158435	0.0142066
GOTERM_CC_DIRECT	GO:0005687~U4 snRNP	4	0.49505	0.000962381	ENSDARG00000033175, ENSDARG00000011648, ENSDARG00000013800, ENSDARG00000011125	571	6	15208	17.756	0.229666	0.0167964	0.015061
SMART	SM00651:Sm	5	0.618812	0.00339112	ENSDARG00000033175, ENSDARG00000040440, ENSDARG00000011648, ENSDARG00000013800, ENSDARG00000011125	392	20	12157	7.75319	0.611062	0.314244	0.314244
INTERPRO	IPR001163:Ribonucleoprotein LSM domain	5	0.618812	0.00445188	ENSDARG00000033175, ENSDARG00000040440, ENSDARG00000011648, ENSDARG00000013800, ENSDARG00000011125	739	20	21293	7.20332	0.997457	0.496756	0.494901
INTERPRO	IPR010920:Like-Sm (LSM) domain	5	0.618812	0.00749467	ENSDARG00000033175, ENSDARG00000040440, ENSDARG00000011648, ENSDARG00000013800, ENSDARG00000011125	739	23	21293	6.26375	0.999958	0.771951	0.769069
Annotation Cluster 5	Enrichment Score: 2.6065318667825834
Category	Term	Count	%	PValue	Genes	List Total	Pop Hits	Pop Total	Fold Enrichment	Bonferroni	Benjamini	FDR
UP_KEYWORDS	Proteasome	9	1.11386	0.000571252	ENSDARG00000030537, ENSDARG00000037963, ENSDARG00000043781, ENSDARG00000002165, ENSDARG00000040121, ENSDARG00000033144, ENSDARG00000031511, ENSDARG00000003526, ENSDARG00000043899	794	54	22487	4.72019	0.114596	0.00935975	0.0084809
GOTERM_CC_DIRECT	GO:0000502~proteasome complex	9	1.11386	0.000954167	ENSDARG00000030537, ENSDARG00000037963, ENSDARG00000043781, ENSDARG00000002165, ENSDARG00000040121, ENSDARG00000033144, ENSDARG00000031511, ENSDARG00000003526, ENSDARG00000043899	571	55	15208	4.35829	0.227947	0.0167964	0.015061
KEGG_PATHWAY	dre03050:Proteasome	8	0.990099	0.0277941	ENSDARG00000030537, ENSDARG00000043781, ENSDARG00000002165, ENSDARG00000040121, ENSDARG00000033144, ENSDARG00000031511, ENSDARG00000003526, ENSDARG00000043899	294	55	5405	2.67409	0.966038	0.277941	0.264044
Annotation Cluster 6	Enrichment Score: 2.2289747938068367
Category	Term	Count	%	PValue	Genes	List Total	Pop Hits	Pop Total	Fold Enrichment	Bonferroni	Benjamini	FDR
UP_KEYWORDS	Viral nucleoprotein	6	0.742574	0.00368791	ENSDARG00000040440, ENSDARG00000011648, ENSDARG00000013800, ENSDARG00000011125, ENSDARG00000036162, ENSDARG00000052617	794	30	22487	5.66423	0.544781	0.0413434	0.0374614
GOTERM_CC_DIRECT	GO:0019013~viral nucleocapsid	6	0.742574	0.00550481	ENSDARG00000040440, ENSDARG00000011648, ENSDARG00000013800, ENSDARG00000011125, ENSDARG00000036162, ENSDARG00000052617	571	31	15208	5.15496	0.775959	0.0573771	0.0514488
UP_KEYWORDS	Virion	6	0.742574	0.00727017	ENSDARG00000040440, ENSDARG00000011648, ENSDARG00000013800, ENSDARG00000011125, ENSDARG00000036162, ENSDARG00000052617	794	35	22487	4.85506	0.788642	0.0737403	0.0668163
GOTERM_CC_DIRECT	GO:0019012~virion	6	0.742574	0.00822306	ENSDARG00000040440, ENSDARG00000011648, ENSDARG00000013800, ENSDARG00000011125, ENSDARG00000036162, ENSDARG00000052617	571	34	15208	4.70011	0.893292	0.069639	0.0624439
Annotation Cluster 7	Enrichment Score: 2.0513371256643125
Category	Term	Count	%	PValue	Genes	List Total	Pop Hits	Pop Total	Fold Enrichment	Bonferroni	Benjamini	FDR
GOTERM_MF_DIRECT	GO:0004812~aminoacyl-tRNA ligase activity	7	0.866337	0.00208739	ENSDARG00000061100, ENSDARG00000044575, ENSDARG00000059070, ENSDARG00000010316, ENSDARG00000013250, ENSDARG00000069142, ENSDARG00000007955	549	39	15797	5.16459	0.736904	0.111154	0.109936
GOTERM_BP_DIRECT	GO:0006418~tRNA aminoacylation for protein translation	7	0.866337	0.0030277	ENSDARG00000061100, ENSDARG00000060036, ENSDARG00000044575, ENSDARG00000059070, ENSDARG00000010316, ENSDARG00000013250, ENSDARG00000007955	590	37	14912	4.78168	0.949552	0.119291	0.116748
KEGG_PATHWAY	dre00970:Aminoacyl-tRNA biosynthesis	7	0.866337	0.110987	ENSDARG00000061100, ENSDARG00000044575, ENSDARG00000059070, ENSDARG00000010316, ENSDARG00000013250, ENSDARG00000069142, ENSDARG00000007955	294	61	5405	2.10968	0.999999	0.739912	0.702917
Annotation Cluster 8	Enrichment Score: 1.9060434361310428
Category	Term	Count	%	PValue	Genes	List Total	Pop Hits	Pop Total	Fold Enrichment	Bonferroni	Benjamini	FDR
UP_KEYWORDS	Threonine protease	5	0.618812	0.00929205	ENSDARG00000043781, ENSDARG00000040121, ENSDARG00000031511, ENSDARG00000003526, ENSDARG00000043899	794	24	22487	5.90024	0.863094	0.0860524	0.0779724
INTERPRO	IPR001353:Proteasome, subunit alpha/beta	5	0.618812	0.011659	ENSDARG00000043781, ENSDARG00000040121, ENSDARG00000031511, ENSDARG00000003526, ENSDARG00000043899	739	26	21293	5.54101	1	0.975712	0.972069
GOTERM_MF_DIRECT	GO:0004298~threonine-type endopeptidase activity	5	0.618812	0.0116743	ENSDARG00000043781, ENSDARG00000040121, ENSDARG00000031511, ENSDARG00000003526, ENSDARG00000043899	549	26	15797	5.53349	0.999449	0.423031	0.418397
GOTERM_MF_DIRECT	GO:0004175~endopeptidase activity	6	0.742574	0.0119164	ENSDARG00000043781, ENSDARG00000040121, ENSDARG00000042793, ENSDARG00000031511, ENSDARG00000003526, ENSDARG00000043899	549	40	15797	4.31612	0.999529	0.423031	0.418397
GOTERM_CC_DIRECT	GO:0005839~proteasome core complex	5	0.618812	0.019572	ENSDARG00000043781, ENSDARG00000040121, ENSDARG00000031511, ENSDARG00000003526, ENSDARG00000043899	571	28	15208	4.75607	0.995283	0.13958	0.125158
Annotation Cluster 9	Enrichment Score: 1.7756155803657483
Category	Term	Count	%	PValue	Genes	List Total	Pop Hits	Pop Total	Fold Enrichment	Bonferroni	Benjamini	FDR
UP_KEYWORDS	Methyltransferase	11	1.36139	0.00798068	ENSDARG00000026225, ENSDARG00000079605, ENSDARG00000010571, ENSDARG00000008480, ENSDARG00000012827, ENSDARG00000036345, ENSDARG00000055753, ENSDARG00000006840, ENSDARG00000010862, ENSDARG00000055151, ENSDARG00000030756	794	116	22487	2.68563	0.818537	0.0772675	0.0700123
UP_KEYWORDS	S-adenosyl-L-methionine	10	1.23762	0.00998628	ENSDARG00000026225, ENSDARG00000079605, ENSDARG00000010571, ENSDARG00000008480, ENSDARG00000012827, ENSDARG00000036345, ENSDARG00000055753, ENSDARG00000006840, ENSDARG00000055151, ENSDARG00000030756	794	102	22487	2.77658	0.882082	0.0886282	0.0803063
GOTERM_BP_DIRECT	GO:0032259~methylation	11	1.36139	0.0262864	ENSDARG00000026225, ENSDARG00000079605, ENSDARG00000010571, ENSDARG00000008480, ENSDARG00000012827, ENSDARG00000036345, ENSDARG00000055753, ENSDARG00000006840, ENSDARG00000010862, ENSDARG00000055151, ENSDARG00000030756	590	125	14912	2.22416	1	0.588167	0.575627
GOTERM_MF_DIRECT	GO:0008168~methyltransferase activity	11	1.36139	0.0377018	ENSDARG00000026225, ENSDARG00000079605, ENSDARG00000010571, ENSDARG00000008480, ENSDARG00000012827, ENSDARG00000036345, ENSDARG00000055753, ENSDARG00000006840, ENSDARG00000010862, ENSDARG00000055151, ENSDARG00000030756	549	151	15797	2.09613	1	0.61773	0.610963
Annotation Cluster 10	Enrichment Score: 1.5675638971581276
Category	Term	Count	%	PValue	Genes	List Total	Pop Hits	Pop Total	Fold Enrichment	Bonferroni	Benjamini	FDR
UP_KEYWORDS	DNA-directed RNA polymerase	4	0.49505	0.0205359	ENSDARG00000052721, ENSDARG00000033273, ENSDARG00000040163, ENSDARG00000036070	794	17	22487	6.6638	0.987962	0.172485	0.156289
GOTERM_MF_DIRECT	GO:0052630~UDP-N-acetylgalactosamine diphosphorylase activity	3	0.371287	0.0224665	ENSDARG00000052721, ENSDARG00000033273, ENSDARG00000040163	549	7	15797	12.3318	1	0.435034	0.430268
GOTERM_MF_DIRECT	GO:0003896~DNA primase activity	3	0.371287	0.0224665	ENSDARG00000052721, ENSDARG00000033273, ENSDARG00000040163	549	7	15797	12.3318	1	0.435034	0.430268
GOTERM_MF_DIRECT	GO:0033677~DNA/RNA helicase activity	3	0.371287	0.0224665	ENSDARG00000052721, ENSDARG00000033273, ENSDARG00000040163	549	7	15797	12.3318	1	0.435034	0.430268
GOTERM_MF_DIRECT	GO:0008192~RNA guanylyltransferase activity	3	0.371287	0.0224665	ENSDARG00000052721, ENSDARG00000033273, ENSDARG00000040163	549	7	15797	12.3318	1	0.435034	0.430268
GOTERM_MF_DIRECT	GO:0043338~CTP:2,3-di-O-geranylgeranyl-sn-glycero-1-phosphate cytidyltransferase activity	3	0.371287	0.0224665	ENSDARG00000052721, ENSDARG00000033273, ENSDARG00000040163	549	7	15797	12.3318	1	0.435034	0.430268
GOTERM_MF_DIRECT	GO:0004779~sulfate adenylyltransferase activity	3	0.371287	0.0224665	ENSDARG00000052721, ENSDARG00000033273, ENSDARG00000040163	549	7	15797	12.3318	1	0.435034	0.430268
GOTERM_MF_DIRECT	GO:0043814~phospholactate guanylyltransferase activity	3	0.371287	0.0224665	ENSDARG00000052721, ENSDARG00000033273, ENSDARG00000040163	549	7	15797	12.3318	1	0.435034	0.430268
GOTERM_MF_DIRECT	GO:0043910~ATP:coenzyme F420 adenylyltransferase activity	3	0.371287	0.0224665	ENSDARG00000052721, ENSDARG00000033273, ENSDARG00000040163	549	7	15797	12.3318	1	0.435034	0.430268
GOTERM_MF_DIRECT	GO:0008905~mannose-phosphate guanylyltransferase activity	3	0.371287	0.0224665	ENSDARG00000052721, ENSDARG00000033273, ENSDARG00000040163	549	7	15797	12.3318	1	0.435034	0.430268
GOTERM_MF_DIRECT	GO:0008193~tRNA guanylyltransferase activity	3	0.371287	0.0292752	ENSDARG00000052721, ENSDARG00000033273, ENSDARG00000040163	549	8	15797	10.7903	1	0.50559	0.500052
GOTERM_MF_DIRECT	GO:0003720~telomerase activity	3	0.371287	0.0292752	ENSDARG00000052721, ENSDARG00000033273, ENSDARG00000040163	549	8	15797	10.7903	1	0.50559	0.500052
GOTERM_MF_DIRECT	GO:0003724~RNA helicase activity	3	0.371287	0.0449463	ENSDARG00000052721, ENSDARG00000033273, ENSDARG00000040163	549	10	15797	8.63224	1	0.718018	0.710152
GOTERM_MF_DIRECT	GO:0003899~DNA-directed RNA polymerase activity	4	0.49505	0.098191	ENSDARG00000052721, ENSDARG00000033273, ENSDARG00000040163, ENSDARG00000036070	549	32	15797	3.59677	1	1	0.990596
Annotation Cluster 11	Enrichment Score: 1.4900701983675089
Category	Term	Count	%	PValue	Genes	List Total	Pop Hits	Pop Total	Fold Enrichment	Bonferroni	Benjamini	FDR
INTERPRO	IPR000301:Tetraspanin	6	0.742574	0.0209486	ENSDARG00000025147, ENSDARG00000068629, ENSDARG00000019098, ENSDARG00000024540, ENSDARG00000068233, ENSDARG00000015759	739	46	21293	3.75825	1	1	0.99701
INTERPRO	IPR008952:Tetraspanin, EC2 domain	6	0.742574	0.0267959	ENSDARG00000025147, ENSDARG00000068629, ENSDARG00000019098, ENSDARG00000024540, ENSDARG00000068233, ENSDARG00000015759	739	49	21293	3.52815	1	1	0.99701
INTERPRO	IPR018499:Tetraspanin/Peripherin	6	0.742574	0.0335902	ENSDARG00000025147, ENSDARG00000068629, ENSDARG00000019098, ENSDARG00000024540, ENSDARG00000068233, ENSDARG00000015759	739	52	21293	3.32461	1	1	0.99701
PIR_SUPERFAMILY	PIRSF002419:tetraspanin	6	0.742574	0.0581141	ENSDARG00000025147, ENSDARG00000068629, ENSDARG00000019098, ENSDARG00000024540, ENSDARG00000068233, ENSDARG00000015759	95	39	1717	2.78057	0.991172	1	1
Annotation Cluster 12	Enrichment Score: 1.437348012361411
Category	Term	Count	%	PValue	Genes	List Total	Pop Hits	Pop Total	Fold Enrichment	Bonferroni	Benjamini	FDR
UP_SEQ_FEATURE	region of interest:Linker 1	3	0.371287	0.00428617	ENSDARG00000025301, ENSDARG00000058358, ENSDARG00000018404	105	3	2704	25.7524	0.726706	0.259742	0.258028
UP_SEQ_FEATURE	region of interest:Linker 12	3	0.371287	0.00428617	ENSDARG00000025301, ENSDARG00000058358, ENSDARG00000018404	105	3	2704	25.7524	0.726706	0.259742	0.258028
UP_SEQ_FEATURE	region of interest:Rod	3	0.371287	0.00428617	ENSDARG00000025301, ENSDARG00000058358, ENSDARG00000018404	105	3	2704	25.7524	0.726706	0.259742	0.258028
UP_SEQ_FEATURE	region of interest:Coil 1A	3	0.371287	0.00428617	ENSDARG00000025301, ENSDARG00000058358, ENSDARG00000018404	105	3	2704	25.7524	0.726706	0.259742	0.258028
UP_SEQ_FEATURE	region of interest:Coil 1B	3	0.371287	0.00428617	ENSDARG00000025301, ENSDARG00000058358, ENSDARG00000018404	105	3	2704	25.7524	0.726706	0.259742	0.258028
UP_SEQ_FEATURE	region of interest:Tail	3	0.371287	0.00835724	ENSDARG00000025301, ENSDARG00000058358, ENSDARG00000018404	105	4	2704	19.3143	0.920698	0.316531	0.314441
UP_SEQ_FEATURE	region of interest:Head	3	0.371287	0.00835724	ENSDARG00000025301, ENSDARG00000058358, ENSDARG00000018404	105	4	2704	19.3143	0.920698	0.316531	0.314441
INTERPRO	IPR018039:Intermediate filament protein, conserved site	4	0.49505	0.160415	ENSDARG00000025301, ENSDARG00000044299, ENSDARG00000058358, ENSDARG00000018404	739	40	21293	2.88133	1	1	0.99701
UP_KEYWORDS	Intermediate filament	4	0.49505	0.296899	ENSDARG00000025301, ENSDARG00000044299, ENSDARG00000058358, ENSDARG00000018404	794	54	22487	2.09786	1	1	0.910377
SMART	SM01391:SM01391	4	0.49505	0.312773	ENSDARG00000025301, ENSDARG00000044299, ENSDARG00000058358, ENSDARG00000018404	392	61	12157	2.03362	1	1	1
INTERPRO	IPR001664:Intermediate filament protein	4	0.49505	0.364281	ENSDARG00000025301, ENSDARG00000044299, ENSDARG00000058358, ENSDARG00000018404	739	62	21293	1.85892	1	1	0.99701
GOTERM_CC_DIRECT	GO:0005882~intermediate filament	4	0.49505	0.412036	ENSDARG00000025301, ENSDARG00000044299, ENSDARG00000058358, ENSDARG00000018404	571	62	15208	1.71832	1	1	0.9
GOTERM_MF_DIRECT	GO:0005198~structural molecule activity	4	0.49505	0.913165	ENSDARG00000025301, ENSDARG00000044299, ENSDARG00000058358, ENSDARG00000018404	549	157	15797	0.733099	1	1	0.990596
Annotation Cluster 13	Enrichment Score: 1.3990831497574403
Category	Term	Count	%	PValue	Genes	List Total	Pop Hits	Pop Total	Fold Enrichment	Bonferroni	Benjamini	FDR
INTERPRO	IPR025661:Cysteine peptidase, asparagine active site	5	0.618812	0.0133193	ENSDARG00000003902, ENSDARG00000077664, ENSDARG00000074656, ENSDARG00000055120, ENSDARG00000043081	739	27	21293	5.33579	1	0.990807	0.987107
SMART	SM00645:Pept_C1	5	0.618812	0.0149052	ENSDARG00000003902, ENSDARG00000077664, ENSDARG00000074656, ENSDARG00000055120, ENSDARG00000043081	392	30	12157	5.16879	0.984622	1	1
INTERPRO	IPR000668:Peptidase C1A, papain C-terminal	5	0.618812	0.0191727	ENSDARG00000003902, ENSDARG00000077664, ENSDARG00000074656, ENSDARG00000055120, ENSDARG00000043081	739	30	21293	4.80221	1	1	0.99701
INTERPRO	IPR013128:Peptidase C1A, papain	5	0.618812	0.0320083	ENSDARG00000003902, ENSDARG00000077664, ENSDARG00000074656, ENSDARG00000055120, ENSDARG00000043081	739	35	21293	4.11618	1	1	0.99701
INTERPRO	IPR025660:Cysteine peptidase, histidine active site	4	0.49505	0.0715413	ENSDARG00000003902, ENSDARG00000077664, ENSDARG00000074656, ENSDARG00000055120	739	28	21293	4.11618	1	1	0.99701
GOTERM_CC_DIRECT	GO:0005764~lysosome	5	0.618812	0.462574	ENSDARG00000003902, ENSDARG00000077664, ENSDARG00000074656, ENSDARG00000055120, ENSDARG00000043081	571	93	15208	1.43193	1	1	0.9
Annotation Cluster 14	Enrichment Score: 1.3967116690892492
Category	Term	Count	%	PValue	Genes	List Total	Pop Hits	Pop Total	Fold Enrichment	Bonferroni	Benjamini	FDR
INTERPRO	IPR018525:Mini-chromosome maintenance, conserved site	3	0.371287	0.0367388	ENSDARG00000019507, ENSDARG00000074326, ENSDARG00000040041	739	9	21293	9.60442	1	1	0.99701
SMART	SM00350:MCM	3	0.371287	0.0391399	ENSDARG00000019507, ENSDARG00000074326, ENSDARG00000040041	392	10	12157	9.30383	0.999985	1	1
INTERPRO	IPR001208:Mini-chromosome maintenance, DNA-dependent ATPase	3	0.371287	0.044887	ENSDARG00000019507, ENSDARG00000074326, ENSDARG00000040041	739	10	21293	8.64398	1	1	0.99701
Annotation Cluster 15	Enrichment Score: 1.3099134009605862
Category	Term	Count	%	PValue	Genes	List Total	Pop Hits	Pop Total	Fold Enrichment	Bonferroni	Benjamini	FDR
SMART	SM00487:DEXDc	9	1.11386	0.0266328	ENSDARG00000074410, ENSDARG00000063535, ENSDARG00000077516, ENSDARG00000015111, ENSDARG00000044325, ENSDARG00000044622, ENSDARG00000018623, ENSDARG00000057738, ENSDARG00000002479	392	111	12157	2.51455	0.999449	1	1
INTERPRO	IPR014001:Helicase, superfamily 1/2, ATP-binding domain	9	1.11386	0.0467128	ENSDARG00000074410, ENSDARG00000063535, ENSDARG00000077516, ENSDARG00000015111, ENSDARG00000044325, ENSDARG00000044622, ENSDARG00000018623, ENSDARG00000057738, ENSDARG00000002479	739	115	21293	2.25495	1	1	0.99701
SMART	SM00490:HELICc	8	0.990099	0.0546667	ENSDARG00000063535, ENSDARG00000077516, ENSDARG00000015111, ENSDARG00000044325, ENSDARG00000044622, ENSDARG00000018623, ENSDARG00000057738, ENSDARG00000002479	392	106	12157	2.34059	1	1	1
INTERPRO	IPR001650:Helicase, C-terminal	8	0.990099	0.0846781	ENSDARG00000063535, ENSDARG00000077516, ENSDARG00000015111, ENSDARG00000044325, ENSDARG00000044622, ENSDARG00000018623, ENSDARG00000057738, ENSDARG00000002479	739	109	21293	2.11473	1	1	0.99701
Annotation Cluster 16	Enrichment Score: 1.2821507295008623
Category	Term	Count	%	PValue	Genes	List Total	Pop Hits	Pop Total	Fold Enrichment	Bonferroni	Benjamini	FDR
INTERPRO	IPR017350:Caspase, interleukin-1 beta convertase	3	0.371287	0.0292364	ENSDARG00000091836, ENSDARG00000008165, ENSDARG00000058325	739	8	21293	10.805	1	1	0.99701
SMART	SM00115:CASc	4	0.49505	0.0323092	ENSDARG00000091836, ENSDARG00000055966, ENSDARG00000008165, ENSDARG00000058325	392	22	12157	5.63868	0.999892	1	1
INTERPRO	IPR015917:Peptidase C14, caspase precursor p45, core	4	0.49505	0.0391153	ENSDARG00000091836, ENSDARG00000055966, ENSDARG00000008165, ENSDARG00000058325	739	22	21293	5.23877	1	1	0.99701
INTERPRO	IPR001309:Peptidase C14, ICE, catalytic subunit p20	4	0.49505	0.0541559	ENSDARG00000091836, ENSDARG00000055966, ENSDARG00000008165, ENSDARG00000058325	739	25	21293	4.61012	1	1	0.99701
PIR_SUPERFAMILY	PIRSF038001:caspase, interleukin-1 beta convertase type	3	0.371287	0.0669289	ENSDARG00000091836, ENSDARG00000008165, ENSDARG00000058325	95	8	1717	6.77763	0.9958	1	1
INTERPRO	IPR002138:Peptidase C14, caspase non-catalytic subunit p10	3	0.371287	0.151439	ENSDARG00000091836, ENSDARG00000008165, ENSDARG00000058325	739	20	21293	4.32199	1	1	0.99701
Annotation Cluster 17	Enrichment Score: 1.2037527182908727
Category	Term	Count	%	PValue	Genes	List Total	Pop Hits	Pop Total	Fold Enrichment	Bonferroni	Benjamini	FDR
UP_KEYWORDS	Endonuclease	5	0.618812	0.0370118	ENSDARG00000011376, ENSDARG00000056832, ENSDARG00000018891, ENSDARG00000069326, ENSDARG00000011404	794	36	22487	3.93349	0.999675	0.231868	0.210096
GOTERM_MF_DIRECT	GO:0004519~endonuclease activity	5	0.618812	0.0568285	ENSDARG00000011376, ENSDARG00000056832, ENSDARG00000018891, ENSDARG00000069326, ENSDARG00000011404	549	42	15797	3.42549	1	0.844497	0.835246
UP_KEYWORDS	Nuclease	5	0.618812	0.116369	ENSDARG00000011376, ENSDARG00000056832, ENSDARG00000018891, ENSDARG00000069326, ENSDARG00000011404	794	53	22487	2.67181	1	0.527373	0.477854
Annotation Cluster 18	Enrichment Score: 1.1784302322391538
Category	Term	Count	%	PValue	Genes	List Total	Pop Hits	Pop Total	Fold Enrichment	Bonferroni	Benjamini	FDR
INTERPRO	IPR018376:Enoyl-CoA hydratase/isomerase, conserved site	3	0.371287	0.0292364	ENSDARG00000018002, ENSDARG00000016607, ENSDARG00000070029	739	8	21293	10.805	1	1	0.99701
INTERPRO	IPR001753:Crotonase superfamily	3	0.371287	0.0536275	ENSDARG00000018002, ENSDARG00000016607, ENSDARG00000070029	739	11	21293	7.85816	1	1	0.99701
GOTERM_BP_DIRECT	GO:0006635~fatty acid beta-oxidation	3	0.371287	0.18595	ENSDARG00000018002, ENSDARG00000016607, ENSDARG00000070029	590	20	14912	3.79119	1	1	0.979675
Annotation Cluster 19	Enrichment Score: 1.0973105943057295
Category	Term	Count	%	PValue	Genes	List Total	Pop Hits	Pop Total	Fold Enrichment	Bonferroni	Benjamini	FDR
SMART	SM00948:SM00948	3	0.371287	0.0391399	ENSDARG00000040121, ENSDARG00000003526, ENSDARG00000043899	392	10	12157	9.30383	0.999985	1	1
INTERPRO	IPR023332:Proteasome A-type subunit	3	0.371287	0.044887	ENSDARG00000040121, ENSDARG00000003526, ENSDARG00000043899	739	10	21293	8.64398	1	1	0.99701
INTERPRO	IPR000426:Proteasome, alpha-subunit, N-terminal domain	3	0.371287	0.044887	ENSDARG00000040121, ENSDARG00000003526, ENSDARG00000043899	739	10	21293	8.64398	1	1	0.99701
GOTERM_CC_DIRECT	GO:0019773~proteasome core complex, alpha-subunit complex	3	0.371287	0.0516957	ENSDARG00000040121, ENSDARG00000003526, ENSDARG00000043899	571	10	15208	7.99019	0.999999	0.304555	0.273088
GOTERM_BP_DIRECT	GO:0006511~ubiquitin-dependent protein catabolic process	4	0.49505	0.800076	ENSDARG00000023002, ENSDARG00000040121, ENSDARG00000003526, ENSDARG00000043899	590	107	14912	0.944844	1	1	0.979675
Annotation Cluster 20	Enrichment Score: 1.0159534603269382
Category	Term	Count	%	PValue	Genes	List Total	Pop Hits	Pop Total	Fold Enrichment	Bonferroni	Benjamini	FDR
SMART	SM00320:WD40	15	1.85644	0.0524089	ENSDARG00000023002, ENSDARG00000054610, ENSDARG00000029058, ENSDARG00000058090, ENSDARG00000074081, ENSDARG00000056473, ENSDARG00000038788, ENSDARG00000011079, ENSDARG00000041113, ENSDARG00000013472, ENSDARG00000041991, ENSDARG00000027063, ENSDARG00000015208, ENSDARG00000037966, ENSDARG00000015998	392	269	12157	1.72934	1	1	1
INTERPRO	IPR001680:WD40 repeat	15	1.85644	0.0909563	ENSDARG00000023002, ENSDARG00000054610, ENSDARG00000029058, ENSDARG00000058090, ENSDARG00000074081, ENSDARG00000056473, ENSDARG00000038788, ENSDARG00000011079, ENSDARG00000041113, ENSDARG00000013472, ENSDARG00000041991, ENSDARG00000027063, ENSDARG00000015208, ENSDARG00000037966, ENSDARG00000015998	739	271	21293	1.59483	1	1	0.99701
INTERPRO	IPR015943:WD40/YVTN repeat-like-containing domain	18	2.22772	0.115575	ENSDARG00000023002, ENSDARG00000054610, ENSDARG00000087191, ENSDARG00000029058, ENSDARG00000058090, ENSDARG00000074081, ENSDARG00000056473, ENSDARG00000079892, ENSDARG00000038788, ENSDARG00000011079, ENSDARG00000041113, ENSDARG00000013472, ENSDARG00000041991, ENSDARG00000027063, ENSDARG00000015208, ENSDARG00000037966, ENSDARG00000070903, ENSDARG00000015998	739	356	21293	1.45685	1	1	0.99701
INTERPRO	IPR017986:WD40-repeat-containing domain	15	1.85644	0.156706	ENSDARG00000023002, ENSDARG00000054610, ENSDARG00000029058, ENSDARG00000058090, ENSDARG00000074081, ENSDARG00000056473, ENSDARG00000038788, ENSDARG00000011079, ENSDARG00000041113, ENSDARG00000013472, ENSDARG00000041991, ENSDARG00000027063, ENSDARG00000015208, ENSDARG00000037966, ENSDARG00000015998	739	298	21293	1.45033	1	1	0.99701
Annotation Cluster 21	Enrichment Score: 0.9120844447709471
Category	Term	Count	%	PValue	Genes	List Total	Pop Hits	Pop Total	Fold Enrichment	Bonferroni	Benjamini	FDR
INTERPRO	IPR013786:Acyl-CoA dehydrogenase/oxidase, N-terminal	3	0.371287	0.0726853	ENSDARG00000045411, ENSDARG00000055620, ENSDARG00000030781	739	13	21293	6.64921	1	1	0.99701
INTERPRO	IPR009075:Acyl-CoA dehydrogenase/oxidase C-terminal	3	0.371287	0.0829093	ENSDARG00000045411, ENSDARG00000055620, ENSDARG00000030781	739	14	21293	6.17427	1	1	0.99701
INTERPRO	IPR006091:Acyl-CoA oxidase/dehydrogenase, central domain	3	0.371287	0.0829093	ENSDARG00000045411, ENSDARG00000055620, ENSDARG00000030781	739	14	21293	6.17427	1	1	0.99701
INTERPRO	IPR009100:Acyl-CoA dehydrogenase/oxidase	3	0.371287	0.093539	ENSDARG00000045411, ENSDARG00000055620, ENSDARG00000030781	739	15	21293	5.76265	1	1	0.99701
GOTERM_MF_DIRECT	GO:0003995~acyl-CoA dehydrogenase activity	3	0.371287	0.104671	ENSDARG00000045411, ENSDARG00000055620, ENSDARG00000030781	549	16	15797	5.39515	1	1	0.990596
GOTERM_MF_DIRECT	GO:0050660~flavin adenine dinucleotide binding	4	0.49505	0.288354	ENSDARG00000045411, ENSDARG00000055620, ENSDARG00000030781, ENSDARG00000077607	549	54	15797	2.13142	1	1	0.990596
GOTERM_MF_DIRECT	GO:0016627~oxidoreductase activity, acting on the CH-CH group of donors	3	0.371287	0.292424	ENSDARG00000045411, ENSDARG00000055620, ENSDARG00000030781	549	31	15797	2.78459	1	1	0.990596
Annotation Cluster 22	Enrichment Score: 0.8840348538849576
Category	Term	Count	%	PValue	Genes	List Total	Pop Hits	Pop Total	Fold Enrichment	Bonferroni	Benjamini	FDR
UP_KEYWORDS	Innate immunity	4	0.49505	0.0682668	ENSDARG00000046148, ENSDARG00000040076, ENSDARG00000044415, ENSDARG00000071491	794	27	22487	4.19573	1	0.378417	0.342885
UP_KEYWORDS	Inflammatory response	3	0.371287	0.1433	ENSDARG00000040076, ENSDARG00000044415, ENSDARG00000071491	794	19	22487	4.47176	1	0.598487	0.542291
UP_KEYWORDS	Immunity	4	0.49505	0.157695	ENSDARG00000046148, ENSDARG00000040076, ENSDARG00000044415, ENSDARG00000071491	794	39	22487	2.90473	1	0.62202	0.563615
GOTERM_BP_DIRECT	GO:0002376~immune system process	4	0.49505	0.18862	ENSDARG00000046148, ENSDARG00000040076, ENSDARG00000044415, ENSDARG00000071491	590	38	14912	2.66048	1	1	0.979675
Annotation Cluster 23	Enrichment Score: 0.8317857213276504
Category	Term	Count	%	PValue	Genes	List Total	Pop Hits	Pop Total	Fold Enrichment	Bonferroni	Benjamini	FDR
GOTERM_MF_DIRECT	GO:0005484~SNAP receptor activity	5	0.618812	0.0793225	ENSDARG00000044039, ENSDARG00000055252, ENSDARG00000052518, ENSDARG00000068262, ENSDARG00000070161	549	47	15797	3.06108	1	1	0.990596
GOTERM_CC_DIRECT	GO:0031201~SNARE complex	5	0.618812	0.143432	ENSDARG00000044039, ENSDARG00000055252, ENSDARG00000052518, ENSDARG00000068262, ENSDARG00000070161	571	54	15208	2.46611	1	0.55249	0.495406
KEGG_PATHWAY	dre04130:SNARE interactions in vesicular transport	5	0.618812	0.202437	ENSDARG00000044039, ENSDARG00000055252, ENSDARG00000052518, ENSDARG00000068262, ENSDARG00000070161	294	43	5405	2.13772	1	1	0.957983
GOTERM_MF_DIRECT	GO:0000149~SNARE binding	4	0.49505	0.20442	ENSDARG00000044039, ENSDARG00000052518, ENSDARG00000068262, ENSDARG00000070161	549	45	15797	2.5577	1	1	0.990596
Annotation Cluster 24	Enrichment Score: 0.7806476480968132
Category	Term	Count	%	PValue	Genes	List Total	Pop Hits	Pop Total	Fold Enrichment	Bonferroni	Benjamini	FDR
INTERPRO	IPR025660:Cysteine peptidase, histidine active site	4	0.49505	0.0715413	ENSDARG00000003902, ENSDARG00000077664, ENSDARG00000074656, ENSDARG00000055120	739	28	21293	4.11618	1	1	0.99701
SMART	SM00848:SM00848	3	0.371287	0.239021	ENSDARG00000003902, ENSDARG00000077664, ENSDARG00000074656	392	29	12157	3.20822	1	1	1
INTERPRO	IPR013201:Proteinase inhibitor I29, cathepsin propeptide	3	0.371287	0.266112	ENSDARG00000003902, ENSDARG00000077664, ENSDARG00000074656	739	29	21293	2.98068	1	1	0.99701
Annotation Cluster 25	Enrichment Score: 0.7373730492416937
Category	Term	Count	%	PValue	Genes	List Total	Pop Hits	Pop Total	Fold Enrichment	Bonferroni	Benjamini	FDR
GOTERM_MF_DIRECT	GO:0018024~histone-lysine N-methyltransferase activity	4	0.49505	0.0912231	ENSDARG00000026225, ENSDARG00000010571, ENSDARG00000055753, ENSDARG00000055151	549	31	15797	3.71279	1	1	0.990596
SMART	SM00317:SET	4	0.49505	0.175507	ENSDARG00000026225, ENSDARG00000010571, ENSDARG00000055753, ENSDARG00000055151	392	45	12157	2.75669	1	1	1
INTERPRO	IPR001214:SET domain	4	0.49505	0.38325	ENSDARG00000026225, ENSDARG00000010571, ENSDARG00000055753, ENSDARG00000055151	739	64	21293	1.80083	1	1	0.99701
Annotation Cluster 26	Enrichment Score: 0.7293363786628577
Category	Term	Count	%	PValue	Genes	List Total	Pop Hits	Pop Total	Fold Enrichment	Bonferroni	Benjamini	FDR
SMART	SM00276:GLECT	3	0.371287	0.102181	ENSDARG00000054942, ENSDARG00000044001, ENSDARG00000041060	392	17	12157	5.47284	1	1	1
SMART	SM00908:SM00908	3	0.371287	0.102181	ENSDARG00000054942, ENSDARG00000044001, ENSDARG00000041060	392	17	12157	5.47284	1	1	1
INTERPRO	IPR001079:Galectin, carbohydrate recognition domain	3	0.371287	0.115856	ENSDARG00000054942, ENSDARG00000044001, ENSDARG00000041060	739	17	21293	5.08469	1	1	0.99701
INTERPRO	IPR013320:Concanavalin A-like lectin/glucanase, subgroup	4	0.49505	0.999988	ENSDARG00000054942, ENSDARG00000044001, ENSDARG00000027290, ENSDARG00000041060	739	460	21293	0.25055	1	1	0.999988
Annotation Cluster 27	Enrichment Score: 0.7024913455499823
Category	Term	Count	%	PValue	Genes	List Total	Pop Hits	Pop Total	Fold Enrichment	Bonferroni	Benjamini	FDR
GOTERM_BP_DIRECT	GO:0043410~positive regulation of MAPK cascade	4	0.49505	0.0604059	ENSDARG00000076800, ENSDARG00000043586, ENSDARG00000037859, ENSDARG00000068993	590	23	14912	4.39558	1	0.962076	0.941565
GOTERM_MF_DIRECT	GO:0005031~tumor necrosis factor-activated receptor activity	3	0.371287	0.214605	ENSDARG00000076800, ENSDARG00000043586, ENSDARG00000068993	549	25	15797	3.4529	1	1	0.990596
INTERPRO	IPR001368:TNFR/NGFR cysteine-rich region	3	0.371287	0.343482	ENSDARG00000076800, ENSDARG00000043586, ENSDARG00000068993	739	35	21293	2.46971	1	1	0.99701
GOTERM_BP_DIRECT	GO:0097190~apoptotic signaling pathway	3	0.371287	0.347865	ENSDARG00000076800, ENSDARG00000043586, ENSDARG00000068993	590	31	14912	2.44593	1	1	0.979675
Annotation Cluster 28	Enrichment Score: 0.7000657027116666
Category	Term	Count	%	PValue	Genes	List Total	Pop Hits	Pop Total	Fold Enrichment	Bonferroni	Benjamini	FDR
INTERPRO	IPR013328:Dehydrogenase, multihelical	3	0.371287	0.0726853	ENSDARG00000040024, ENSDARG00000036942, ENSDARG00000070029	739	13	21293	6.64921	1	1	0.99701
INTERPRO	IPR008927:6-phosphogluconate dehydrogenase, C-terminal-like	3	0.371287	0.12747	ENSDARG00000040024, ENSDARG00000036942, ENSDARG00000070029	739	18	21293	4.80221	1	1	0.99701
UP_KEYWORDS	NAD	3	0.371287	0.856936	ENSDARG00000040024, ENSDARG00000036942, ENSDARG00000070029	794	96	22487	0.885036	1	1	0.910377
Annotation Cluster 29	Enrichment Score: 0.6669789121904728
Category	Term	Count	%	PValue	Genes	List Total	Pop Hits	Pop Total	Fold Enrichment	Bonferroni	Benjamini	FDR
GOTERM_BP_DIRECT	GO:0070098~chemokine-mediated signaling pathway	4	0.49505	0.131058	ENSDARG00000074487, ENSDARG00000039351, ENSDARG00000075045, ENSDARG00000093098	590	32	14912	3.15932	1	1	0.979675
GOTERM_BP_DIRECT	GO:0030593~neutrophil chemotaxis	4	0.49505	0.168733	ENSDARG00000074487, ENSDARG00000039351, ENSDARG00000075045, ENSDARG00000093098	590	36	14912	2.80829	1	1	0.979675
GOTERM_MF_DIRECT	GO:0008009~chemokine activity	4	0.49505	0.2599	ENSDARG00000074487, ENSDARG00000039351, ENSDARG00000075045, ENSDARG00000093098	549	51	15797	2.25679	1	1	0.990596
INTERPRO	IPR001811:Chemokine interleukin-8-like domain	4	0.49505	0.373779	ENSDARG00000074487, ENSDARG00000039351, ENSDARG00000075045, ENSDARG00000093098	739	63	21293	1.82941	1	1	0.99701
Annotation Cluster 30	Enrichment Score: 0.6349052175843518
Category	Term	Count	%	PValue	Genes	List Total	Pop Hits	Pop Total	Fold Enrichment	Bonferroni	Benjamini	FDR
GOTERM_BP_DIRECT	GO:0007017~microtubule-based process	4	0.49505	0.19878	ENSDARG00000041723, ENSDARG00000005619, ENSDARG00000042708, ENSDARG00000094466	590	39	14912	2.59226	1	1	0.979675
SMART	SM00865:SM00865	3	0.371287	0.20319	ENSDARG00000041723, ENSDARG00000042708, ENSDARG00000094466	392	26	12157	3.57839	1	1	1
SMART	SM00864:SM00864	3	0.371287	0.215078	ENSDARG00000041723, ENSDARG00000042708, ENSDARG00000094466	392	27	12157	3.44586	1	1	1
INTERPRO	IPR018316:Tubulin/FtsZ, 2-layer sandwich domain	3	0.371287	0.227219	ENSDARG00000041723, ENSDARG00000042708, ENSDARG00000094466	739	26	21293	3.32461	1	1	0.99701
INTERPRO	IPR023123:Tubulin, C-terminal	3	0.371287	0.240157	ENSDARG00000041723, ENSDARG00000042708, ENSDARG00000094466	739	27	21293	3.20147	1	1	0.99701
INTERPRO	IPR008280:Tubulin/FtsZ, C-terminal	3	0.371287	0.240157	ENSDARG00000041723, ENSDARG00000042708, ENSDARG00000094466	739	27	21293	3.20147	1	1	0.99701
INTERPRO	IPR000217:Tubulin	3	0.371287	0.240157	ENSDARG00000041723, ENSDARG00000042708, ENSDARG00000094466	739	27	21293	3.20147	1	1	0.99701
INTERPRO	IPR017975:Tubulin, conserved site	3	0.371287	0.240157	ENSDARG00000041723, ENSDARG00000042708, ENSDARG00000094466	739	27	21293	3.20147	1	1	0.99701
INTERPRO	IPR003008:Tubulin/FtsZ, GTPase domain	3	0.371287	0.253127	ENSDARG00000041723, ENSDARG00000042708, ENSDARG00000094466	739	28	21293	3.08714	1	1	0.99701
GOTERM_MF_DIRECT	GO:0005200~structural constituent of cytoskeleton	4	0.49505	0.269349	ENSDARG00000041723, ENSDARG00000071694, ENSDARG00000042708, ENSDARG00000094466	549	52	15797	2.21339	1	1	0.990596
Annotation Cluster 31	Enrichment Score: 0.6116360378467202
Category	Term	Count	%	PValue	Genes	List Total	Pop Hits	Pop Total	Fold Enrichment	Bonferroni	Benjamini	FDR
GOTERM_BP_DIRECT	GO:0031629~synaptic vesicle fusion to presynaptic active zone membrane	3	0.371287	0.143515	ENSDARG00000044039, ENSDARG00000055252, ENSDARG00000052518	590	17	14912	4.46022	1	1	0.979675
SMART	SM00397:t_SNARE	3	0.371287	0.251044	ENSDARG00000044039, ENSDARG00000055252, ENSDARG00000052518	392	30	12157	3.10128	1	1	1
INTERPRO	IPR000727:Target SNARE coiled-coil domain	3	0.371287	0.405923	ENSDARG00000044039, ENSDARG00000055252, ENSDARG00000052518	739	40	21293	2.16099	1	1	0.99701
Annotation Cluster 32	Enrichment Score: 0.6003455931711049
Category	Term	Count	%	PValue	Genes	List Total	Pop Hits	Pop Total	Fold Enrichment	Bonferroni	Benjamini	FDR
SMART	SM00132:LIM	6	0.742574	0.219351	ENSDARG00000075733, ENSDARG00000034643, ENSDARG00000057867, ENSDARG00000079488, ENSDARG00000071558, ENSDARG00000051857	392	100	12157	1.86077	1	1	1
INTERPRO	IPR001781:Zinc finger, LIM-type	6	0.742574	0.266075	ENSDARG00000075733, ENSDARG00000034643, ENSDARG00000057867, ENSDARG00000079488, ENSDARG00000071558, ENSDARG00000051857	739	100	21293	1.7288	1	1	0.99701
UP_KEYWORDS	LIM domain	6	0.742574	0.270907	ENSDARG00000075733, ENSDARG00000034643, ENSDARG00000057867, ENSDARG00000079488, ENSDARG00000071558, ENSDARG00000051857	794	99	22487	1.71643	1	0.994883	0.901467
Annotation Cluster 33	Enrichment Score: 0.5964437276977979
Category	Term	Count	%	PValue	Genes	List Total	Pop Hits	Pop Total	Fold Enrichment	Bonferroni	Benjamini	FDR
SMART	SM01332:SM01332	3	0.371287	0.134195	ENSDARG00000019741, ENSDARG00000011094, ENSDARG00000051923	392	20	12157	4.65191	1	1	1
INTERPRO	IPR004367:Cyclin, C-terminal domain	3	0.371287	0.163733	ENSDARG00000019741, ENSDARG00000011094, ENSDARG00000051923	739	21	21293	4.11618	1	1	0.99701
INTERPRO	IPR013763:Cyclin-like	4	0.49505	0.250114	ENSDARG00000006782, ENSDARG00000019741, ENSDARG00000011094, ENSDARG00000051923	739	50	21293	2.30506	1	1	0.99701
INTERPRO	IPR006671:Cyclin, N-terminal	3	0.371287	0.356166	ENSDARG00000019741, ENSDARG00000011094, ENSDARG00000051923	739	36	21293	2.40111	1	1	0.99701
UP_KEYWORDS	Cyclin	3	0.371287	0.364123	ENSDARG00000019741, ENSDARG00000011094, ENSDARG00000051923	794	36	22487	2.3601	1	1	0.910377
SMART	SM00385:CYCLIN	3	0.371287	0.37019	ENSDARG00000019741, ENSDARG00000011094, ENSDARG00000051923	392	40	12157	2.32596	1	1	1
Annotation Cluster 34	Enrichment Score: 0.5726426599375761
Category	Term	Count	%	PValue	Genes	List Total	Pop Hits	Pop Total	Fold Enrichment	Bonferroni	Benjamini	FDR
GOTERM_MF_DIRECT	GO:0043765~T/G mismatch-specific endonuclease activity	3	0.371287	0.240459	ENSDARG00000015765, ENSDARG00000056832, ENSDARG00000011404	549	27	15797	3.19713	1	1	0.990596
GOTERM_MF_DIRECT	GO:0044824~retroviral 3' processing activity	3	0.371287	0.240459	ENSDARG00000015765, ENSDARG00000056832, ENSDARG00000011404	549	27	15797	3.19713	1	1	0.990596
GOTERM_MF_DIRECT	GO:0042578~phosphoric ester hydrolase activity	3	0.371287	0.331122	ENSDARG00000015765, ENSDARG00000056832, ENSDARG00000011404	549	34	15797	2.53889	1	1	0.990596
Annotation Cluster 35	Enrichment Score: 0.5275299751516082
Category	Term	Count	%	PValue	Genes	List Total	Pop Hits	Pop Total	Fold Enrichment	Bonferroni	Benjamini	FDR
INTERPRO	IPR017937:Thioredoxin, conserved site	3	0.371287	0.139342	ENSDARG00000018491, ENSDARG00000009001, ENSDARG00000044125	739	19	21293	4.54946	1	1	0.99701
GOTERM_BP_DIRECT	GO:0045454~cell redox homeostasis	4	0.49505	0.424532	ENSDARG00000018491, ENSDARG00000028106, ENSDARG00000009001, ENSDARG00000044125	590	60	14912	1.68497	1	1	0.979675
INTERPRO	IPR013766:Thioredoxin domain	3	0.371287	0.441996	ENSDARG00000018491, ENSDARG00000009001, ENSDARG00000044125	739	43	21293	2.01023	1	1	0.99701
Annotation Cluster 36	Enrichment Score: 0.5126330335644935
Category	Term	Count	%	PValue	Genes	List Total	Pop Hits	Pop Total	Fold Enrichment	Bonferroni	Benjamini	FDR
UP_KEYWORDS	Aminoacyl-tRNA synthetase	4	0.49505	0.0510067	ENSDARG00000044575, ENSDARG00000010316, ENSDARG00000069142, ENSDARG00000007955	794	24	22487	4.72019	0.999986	0.301789	0.273452
UP_KEYWORDS	Ligase	5	0.618812	0.67716	ENSDARG00000044575, ENSDARG00000010316, ENSDARG00000010487, ENSDARG00000069142, ENSDARG00000007955	794	130	22487	1.08928	1	1	0.910377
GOTERM_MF_DIRECT	GO:0016874~ligase activity	5	0.618812	0.83904	ENSDARG00000044575, ENSDARG00000010316, ENSDARG00000010487, ENSDARG00000069142, ENSDARG00000007955	549	168	15797	0.856373	1	1	0.990596
Annotation Cluster 37	Enrichment Score: 0.4942216605069531
Category	Term	Count	%	PValue	Genes	List Total	Pop Hits	Pop Total	Fold Enrichment	Bonferroni	Benjamini	FDR
GOTERM_MF_DIRECT	GO:0016301~kinase activity	28	3.46535	0.212508	ENSDARG00000026577, ENSDARG00000025820, ENSDARG00000046143, ENSDARG00000005619, ENSDARG00000058292, ENSDARG00000058471, ENSDARG00000087554, ENSDARG00000042000, ENSDARG00000068177, ENSDARG00000070903, ENSDARG00000031715, ENSDARG00000054318, ENSDARG00000001782, ENSDARG00000005926, ENSDARG00000055566, ENSDARG00000004059, ENSDARG00000004576, ENSDARG00000004433, ENSDARG00000075253, ENSDARG00000012485,…	549	661	15797	1.21887	1	1	0.990596
UP_KEYWORDS	Kinase	27	3.34158	0.356003	ENSDARG00000026577, ENSDARG00000025820, ENSDARG00000046143, ENSDARG00000005619, ENSDARG00000058292, ENSDARG00000058471, ENSDARG00000087554, ENSDARG00000042000, ENSDARG00000068177, ENSDARG00000070903, ENSDARG00000031715, ENSDARG00000054318, ENSDARG00000001782, ENSDARG00000005926, ENSDARG00000055566, ENSDARG00000004059, ENSDARG00000004576, ENSDARG00000004433, ENSDARG00000075253, ENSDARG00000012485,…	794	679	22487	1.12617	1	1	0.910377
GOTERM_BP_DIRECT	GO:0016310~phosphorylation	28	3.46535	0.435017	ENSDARG00000026577, ENSDARG00000025820, ENSDARG00000046143, ENSDARG00000005619, ENSDARG00000058292, ENSDARG00000058471, ENSDARG00000087554, ENSDARG00000042000, ENSDARG00000068177, ENSDARG00000070903, ENSDARG00000031715, ENSDARG00000054318, ENSDARG00000001782, ENSDARG00000005926, ENSDARG00000055566, ENSDARG00000004059, ENSDARG00000004576, ENSDARG00000004433, ENSDARG00000075253, ENSDARG00000012485,…	590	654	14912	1.08209	1	1	0.979675
Annotation Cluster 38	Enrichment Score: 0.4676226112400859
Category	Term	Count	%	PValue	Genes	List Total	Pop Hits	Pop Total	Fold Enrichment	Bonferroni	Benjamini	FDR
UP_KEYWORDS	SH3 domain	10	1.23762	0.174379	ENSDARG00000031715, ENSDARG00000012729, ENSDARG00000078734, ENSDARG00000068763, ENSDARG00000057867, ENSDARG00000004433, ENSDARG00000006468, ENSDARG00000074262, ENSDARG00000005821, ENSDARG00000005414	794	177	22487	1.60007	1	0.675323	0.611913
SMART	SM00326:SH3	10	1.23762	0.437008	ENSDARG00000031715, ENSDARG00000012729, ENSDARG00000078734, ENSDARG00000068763, ENSDARG00000057867, ENSDARG00000004433, ENSDARG00000006468, ENSDARG00000074262, ENSDARG00000005821, ENSDARG00000005414	392	257	12157	1.20672	1	1	1
INTERPRO	IPR001452:Src homology-3 domain	11	1.36139	0.518976	ENSDARG00000031715, ENSDARG00000012729, ENSDARG00000078734, ENSDARG00000068763, ENSDARG00000054340, ENSDARG00000057867, ENSDARG00000004433, ENSDARG00000006468, ENSDARG00000074262, ENSDARG00000005821, ENSDARG00000005414	739	281	21293	1.12792	1	1	0.99701
Annotation Cluster 39	Enrichment Score: 0.45979335689501893
Category	Term	Count	%	PValue	Genes	List Total	Pop Hits	Pop Total	Fold Enrichment	Bonferroni	Benjamini	FDR
SMART	SM00240:FHA	3	0.371287	0.191381	ENSDARG00000025820, ENSDARG00000062187, ENSDARG00000040036	392	25	12157	3.72153	1	1	1
INTERPRO	IPR008984:SMAD/FHA domain	4	0.49505	0.457467	ENSDARG00000025820, ENSDARG00000016457, ENSDARG00000062187, ENSDARG00000040036	739	72	21293	1.60074	1	1	0.99701
INTERPRO	IPR000253:Forkhead-associated (FHA) domain	3	0.371287	0.476826	ENSDARG00000025820, ENSDARG00000062187, ENSDARG00000040036	739	46	21293	1.87913	1	1	0.99701
Annotation Cluster 40	Enrichment Score: 0.2586395691152064
Category	Term	Count	%	PValue	Genes	List Total	Pop Hits	Pop Total	Fold Enrichment	Bonferroni	Benjamini	FDR
INTERPRO	IPR014352:FERM/acyl-CoA-binding protein, 3-helical bundle	4	0.49505	0.345219	ENSDARG00000026369, ENSDARG00000058128, ENSDARG00000079267, ENSDARG00000053835	739	60	21293	1.92088	1	1	0.99701
SMART	SM00295:B41	3	0.371287	0.614839	ENSDARG00000058128, ENSDARG00000079267, ENSDARG00000053835	392	64	12157	1.45372	1	1	1
INTERPRO	IPR019748:FERM central domain	3	0.371287	0.65546	ENSDARG00000058128, ENSDARG00000079267, ENSDARG00000053835	739	64	21293	1.35062	1	1	0.99701
INTERPRO	IPR019749:Band 4.1 domain	3	0.371287	0.663802	ENSDARG00000058128, ENSDARG00000079267, ENSDARG00000053835	739	65	21293	1.32984	1	1	0.99701
Annotation Cluster 41	Enrichment Score: 0.25585094892479693
Category	Term	Count	%	PValue	Genes	List Total	Pop Hits	Pop Total	Fold Enrichment	Bonferroni	Benjamini	FDR
SMART	SM00220:S_TKc	20	2.47525	0.410422	ENSDARG00000026577, ENSDARG00000054318, ENSDARG00000025820, ENSDARG00000092290, ENSDARG00000001782, ENSDARG00000005619, ENSDARG00000055566, ENSDARG00000077029, ENSDARG00000004176, ENSDARG00000037174, ENSDARG00000058471, ENSDARG00000012485, ENSDARG00000037963, ENSDARG00000087554, ENSDARG00000061710, ENSDARG00000037640, ENSDARG00000007221, ENSDARG00000042000, ENSDARG00000041361, ENSDARG00000068177	392	550	12157	1.12774	1	1	1
INTERPRO	IPR011009:Protein kinase-like domain	28	3.46535	0.533814	ENSDARG00000026577, ENSDARG00000025820, ENSDARG00000005619, ENSDARG00000045411, ENSDARG00000077029, ENSDARG00000053131, ENSDARG00000037174, ENSDARG00000058471, ENSDARG00000087554, ENSDARG00000031751, ENSDARG00000042000, ENSDARG00000068177, ENSDARG00000070903, ENSDARG00000031715, ENSDARG00000054318, ENSDARG00000092290, ENSDARG00000001782, ENSDARG00000055566, ENSDARG00000004176, ENSDARG00000004576,…	739	781	21293	1.033	1	1	0.99701
GOTERM_MF_DIRECT	GO:0004672~protein kinase activity	26	3.21782	0.542247	ENSDARG00000026577, ENSDARG00000025820, ENSDARG00000005619, ENSDARG00000077029, ENSDARG00000053131, ENSDARG00000037174, ENSDARG00000058471, ENSDARG00000087554, ENSDARG00000031751, ENSDARG00000042000, ENSDARG00000068177, ENSDARG00000070903, ENSDARG00000031715, ENSDARG00000054318, ENSDARG00000092290, ENSDARG00000001782, ENSDARG00000055566, ENSDARG00000004176, ENSDARG00000004576, ENSDARG00000004433,…	549	725	15797	1.0319	1	1	0.990596
INTERPRO	IPR000719:Protein kinase, catalytic domain	26	3.21782	0.567968	ENSDARG00000026577, ENSDARG00000025820, ENSDARG00000005619, ENSDARG00000077029, ENSDARG00000053131, ENSDARG00000037174, ENSDARG00000058471, ENSDARG00000087554, ENSDARG00000031751, ENSDARG00000042000, ENSDARG00000068177, ENSDARG00000070903, ENSDARG00000031715, ENSDARG00000054318, ENSDARG00000092290, ENSDARG00000001782, ENSDARG00000055566, ENSDARG00000004176, ENSDARG00000004576, ENSDARG00000004433,…	739	735	21293	1.01924	1	1	0.99701
GOTERM_BP_DIRECT	GO:0006468~protein phosphorylation	26	3.21782	0.779118	ENSDARG00000026577, ENSDARG00000025820, ENSDARG00000005619, ENSDARG00000077029, ENSDARG00000053131, ENSDARG00000037174, ENSDARG00000058471, ENSDARG00000087554, ENSDARG00000031751, ENSDARG00000042000, ENSDARG00000068177, ENSDARG00000070903, ENSDARG00000031715, ENSDARG00000054318, ENSDARG00000092290, ENSDARG00000001782, ENSDARG00000055566, ENSDARG00000004176, ENSDARG00000004576, ENSDARG00000004433,…	590	721	14912	0.911427	1	1	0.979675
Annotation Cluster 42	Enrichment Score: 0.2384993644766872
Category	Term	Count	%	PValue	Genes	List Total	Pop Hits	Pop Total	Fold Enrichment	Bonferroni	Benjamini	FDR
UP_SEQ_FEATURE	repeat:WD 6	3	0.371287	0.472637	ENSDARG00000029058, ENSDARG00000015208, ENSDARG00000037966	105	41	2704	1.88432	1	1	0.996689
UP_SEQ_FEATURE	repeat:WD 5	3	0.371287	0.534429	ENSDARG00000029058, ENSDARG00000015208, ENSDARG00000037966	105	46	2704	1.6795	1	1	0.996689
UP_SEQ_FEATURE	repeat:WD 4	3	0.371287	0.58023	ENSDARG00000029058, ENSDARG00000015208, ENSDARG00000037966	105	50	2704	1.54514	1	1	0.996689
UP_SEQ_FEATURE	repeat:WD 3	3	0.371287	0.612388	ENSDARG00000029058, ENSDARG00000015208, ENSDARG00000037966	105	53	2704	1.45768	1	1	0.996689
UP_SEQ_FEATURE	repeat:WD 1	3	0.371287	0.642657	ENSDARG00000029058, ENSDARG00000015208, ENSDARG00000037966	105	56	2704	1.37959	1	1	0.996689
UP_SEQ_FEATURE	repeat:WD 2	3	0.371287	0.642657	ENSDARG00000029058, ENSDARG00000015208, ENSDARG00000037966	105	56	2704	1.37959	1	1	0.996689
Annotation Cluster 43	Enrichment Score: 0.23244885527103254
Category	Term	Count	%	PValue	Genes	List Total	Pop Hits	Pop Total	Fold Enrichment	Bonferroni	Benjamini	FDR
UP_KEYWORDS	Initiation factor	3	0.371287	0.519641	ENSDARG00000052178, ENSDARG00000005827, ENSDARG00000017235	794	49	22487	1.73395	1	1	0.910377
GOTERM_MF_DIRECT	GO:0003743~translation initiation factor activity	3	0.371287	0.573486	ENSDARG00000052178, ENSDARG00000005827, ENSDARG00000017235	549	55	15797	1.5695	1	1	0.990596
GOTERM_BP_DIRECT	GO:0006413~translational initiation	3	0.371287	0.673638	ENSDARG00000052178, ENSDARG00000005827, ENSDARG00000017235	590	58	14912	1.30731	1	1	0.979675
Annotation Cluster 44	Enrichment Score: 0.2011976649031058
Category	Term	Count	%	PValue	Genes	List Total	Pop Hits	Pop Total	Fold Enrichment	Bonferroni	Benjamini	FDR
SMART	SM00324:RhoGAP	4	0.49505	0.52605	ENSDARG00000062049, ENSDARG00000015460, ENSDARG00000077410, ENSDARG00000062349	392	86	12157	1.44245	1	1	1
INTERPRO	IPR000198:Rho GTPase-activating protein domain	4	0.49505	0.600165	ENSDARG00000062049, ENSDARG00000015460, ENSDARG00000077410, ENSDARG00000062349	739	89	21293	1.29498	1	1	0.99701
SMART	SM00109:C1	3	0.371287	0.678542	ENSDARG00000062049, ENSDARG00000015460, ENSDARG00000077410	392	72	12157	1.2922	1	1	1
INTERPRO	IPR002219:Protein kinase C-like, phorbol ester/diacylglycerol binding	3	0.371287	0.731702	ENSDARG00000062049, ENSDARG00000015460, ENSDARG00000077410	739	74	21293	1.16811	1	1	0.99701
Annotation Cluster 45	Enrichment Score: 0.20078915083684365
Category	Term	Count	%	PValue	Genes	List Total	Pop Hits	Pop Total	Fold Enrichment	Bonferroni	Benjamini	FDR
SMART	SM00360:RRM	8	0.990099	0.612716	ENSDARG00000039424, ENSDARG00000090337, ENSDARG00000019362, ENSDARG00000059259, ENSDARG00000040184, ENSDARG00000036162, ENSDARG00000052617, ENSDARG00000036161	392	230	12157	1.0787	1	1	1
INTERPRO	IPR000504:RNA recognition motif domain	9	1.11386	0.626927	ENSDARG00000039424, ENSDARG00000015325, ENSDARG00000090337, ENSDARG00000019362, ENSDARG00000059259, ENSDARG00000040184, ENSDARG00000036162, ENSDARG00000052617, ENSDARG00000036161	739	247	21293	1.04988	1	1	0.99701
INTERPRO	IPR012677:Nucleotide-binding, alpha-beta plait	10	1.23762	0.650364	ENSDARG00000039424, ENSDARG00000015325, ENSDARG00000090337, ENSDARG00000019362, ENSDARG00000059259, ENSDARG00000040184, ENSDARG00000036162, ENSDARG00000052617, ENSDARG00000036161, ENSDARG00000006316	739	283	21293	1.01814	1	1	0.99701
Annotation Cluster 46	Enrichment Score: 0.1762003332991391
Category	Term	Count	%	PValue	Genes	List Total	Pop Hits	Pop Total	Fold Enrichment	Bonferroni	Benjamini	FDR
INTERPRO	IPR019787:Zinc finger, PHD-finger	4	0.49505	0.607758	ENSDARG00000026225, ENSDARG00000063535, ENSDARG00000055359, ENSDARG00000068175	739	90	21293	1.28059	1	1	0.99701
SMART	SM00249:PHD	4	0.49505	0.641976	ENSDARG00000026225, ENSDARG00000063535, ENSDARG00000055359, ENSDARG00000068175	392	102	12157	1.21619	1	1	1
INTERPRO	IPR001965:Zinc finger, PHD-type	4	0.49505	0.691218	ENSDARG00000026225, ENSDARG00000063535, ENSDARG00000055359, ENSDARG00000068175	739	102	21293	1.12993	1	1	0.99701
INTERPRO	IPR019786:Zinc finger, PHD-type, conserved site	3	0.371287	0.731702	ENSDARG00000026225, ENSDARG00000063535, ENSDARG00000068175	739	74	21293	1.16811	1	1	0.99701
Annotation Cluster 47	Enrichment Score: 0.17249183893554473
Category	Term	Count	%	PValue	Genes	List Total	Pop Hits	Pop Total	Fold Enrichment	Bonferroni	Benjamini	FDR
UP_KEYWORDS	Transcription	25	3.09406	0.534077	ENSDARG00000021086, ENSDARG00000052721, ENSDARG00000031848, ENSDARG00000028159, ENSDARG00000043531, ENSDARG00000014591, ENSDARG00000008986, ENSDARG00000055151, ENSDARG00000022712, ENSDARG00000010571, ENSDARG00000033273, ENSDARG00000007097, ENSDARG00000038386, ENSDARG00000057323, ENSDARG00000008540, ENSDARG00000037410, ENSDARG00000040163, ENSDARG00000015902, ENSDARG00000015208, ENSDARG00000015427,…	794	682	22487	1.03817	1	1	0.910377
UP_KEYWORDS	Transcription regulation	21	2.59901	0.732207	ENSDARG00000021086, ENSDARG00000031848, ENSDARG00000056438, ENSDARG00000028159, ENSDARG00000029058, ENSDARG00000070542, ENSDARG00000043531, ENSDARG00000014591, ENSDARG00000008986, ENSDARG00000055151, ENSDARG00000063649, ENSDARG00000022712, ENSDARG00000010571, ENSDARG00000007097, ENSDARG00000038386, ENSDARG00000057323, ENSDARG00000008540, ENSDARG00000037410, ENSDARG00000015902, ENSDARG00000015208,…	794	636	22487	0.935133	1	1	0.910377
GOTERM_BP_DIRECT	GO:0006351~transcription, DNA-templated	27	3.34158	0.776759	ENSDARG00000021086, ENSDARG00000052721, ENSDARG00000031848, ENSDARG00000028159, ENSDARG00000043531, ENSDARG00000014591, ENSDARG00000008986, ENSDARG00000055151, ENSDARG00000022712, ENSDARG00000010571, ENSDARG00000033273, ENSDARG00000016514, ENSDARG00000007097, ENSDARG00000038386, ENSDARG00000057323, ENSDARG00000008540, ENSDARG00000037410, ENSDARG00000040163, ENSDARG00000015902, ENSDARG00000015208,…	590	747	14912	0.913539	1	1	0.979675
Annotation Cluster 48	Enrichment Score: 0.11525420887432081
Category	Term	Count	%	PValue	Genes	List Total	Pop Hits	Pop Total	Fold Enrichment	Bonferroni	Benjamini	FDR
SMART	SM00353:HLH	5	0.618812	0.690462	ENSDARG00000007097, ENSDARG00000056438, ENSDARG00000038386, ENSDARG00000077473, ENSDARG00000040946	392	145	12157	1.06941	1	1	1
INTERPRO	IPR011598:Myc-type, basic helix-loop-helix (bHLH) domain	5	0.618812	0.758667	ENSDARG00000007097, ENSDARG00000056438, ENSDARG00000038386, ENSDARG00000077473, ENSDARG00000040946	739	148	21293	0.973421	1	1	0.99701
GOTERM_MF_DIRECT	GO:0046983~protein dimerization activity	5	0.618812	0.861086	ENSDARG00000007097, ENSDARG00000056438, ENSDARG00000038386, ENSDARG00000077473, ENSDARG00000040946	549	175	15797	0.822118	1	1	0.990596
Annotation Cluster 49	Enrichment Score: 0.11365851093050923
Category	Term	Count	%	PValue	Genes	List Total	Pop Hits	Pop Total	Fold Enrichment	Bonferroni	Benjamini	FDR
UP_KEYWORDS	Tyrosine-protein kinase	4	0.49505	0.627013	ENSDARG00000031715, ENSDARG00000041361, ENSDARG00000004433, ENSDARG00000070903	794	91	22487	1.24489	1	1	0.910377
GOTERM_MF_DIRECT	GO:0004713~protein tyrosine kinase activity	4	0.49505	0.72844	ENSDARG00000031715, ENSDARG00000041361, ENSDARG00000004433, ENSDARG00000070903	549	108	15797	1.06571	1	1	0.990596
GOTERM_BP_DIRECT	GO:0007169~transmembrane receptor protein tyrosine kinase signaling pathway	4	0.49505	0.772969	ENSDARG00000031715, ENSDARG00000055955, ENSDARG00000004433, ENSDARG00000070903	590	102	14912	0.99116	1	1	0.979675
INTERPRO	IPR008266:Tyrosine-protein kinase, active site	4	0.49505	0.785517	ENSDARG00000031715, ENSDARG00000004576, ENSDARG00000004433, ENSDARG00000070903	739	119	21293	0.968513	1	1	0.99701
SMART	SM00219:TyrKc	3	0.371287	0.852439	ENSDARG00000031715, ENSDARG00000004433, ENSDARG00000070903	392	104	12157	0.894599	1	1	1
INTERPRO	IPR020635:Tyrosine-protein kinase, catalytic domain	3	0.371287	0.879829	ENSDARG00000031715, ENSDARG00000004433, ENSDARG00000070903	739	104	21293	0.831152	1	1	0.99701
Annotation Cluster 50	Enrichment Score: 0.028492483630879563
Category	Term	Count	%	PValue	Genes	List Total	Pop Hits	Pop Total	Fold Enrichment	Bonferroni	Benjamini	FDR
INTERPRO	IPR009003:Trypsin-like cysteine/serine peptidase domain	4	0.49505	0.920888	ENSDARG00000095807, ENSDARG00000090730, ENSDARG00000053323, ENSDARG00000052895	739	161	21293	0.715857	1	1	0.99701
SMART	SM00020:Tryp_SPc	3	0.371287	0.932774	ENSDARG00000095807, ENSDARG00000090730, ENSDARG00000053323	392	134	12157	0.694315	1	1	1
INTERPRO	IPR001314:Peptidase S1A, chymotrypsin-type	3	0.371287	0.939297	ENSDARG00000095807, ENSDARG00000090730, ENSDARG00000053323	739	128	21293	0.675311	1	1	0.99701
INTERPRO	IPR001254:Peptidase S1	3	0.371287	0.953331	ENSDARG00000095807, ENSDARG00000090730, ENSDARG00000053323	739	137	21293	0.630947	1	1	0.99701
Annotation Cluster 51	Enrichment Score: 0.023950812995449287
Category	Term	Count	%	PValue	Genes	List Total	Pop Hits	Pop Total	Fold Enrichment	Bonferroni	Benjamini	FDR
INTERPRO	IPR016186:C-type lectin-like	4	0.49505	0.926637	ENSDARG00000038822, ENSDARG00000059049, ENSDARG00000056379, ENSDARG00000093440	739	164	21293	0.702762	1	1	0.99701
INTERPRO	IPR016187:C-type lectin fold	4	0.49505	0.940145	ENSDARG00000038822, ENSDARG00000059049, ENSDARG00000056379, ENSDARG00000093440	739	172	21293	0.670076	1	1	0.99701
SMART	SM00034:CLECT	3	0.371287	0.952754	ENSDARG00000038822, ENSDARG00000059049, ENSDARG00000056379	392	147	12157	0.632913	1	1	1
INTERPRO	IPR001304:C-type lectin	3	0.371287	0.966299	ENSDARG00000038822, ENSDARG00000059049, ENSDARG00000056379	739	148	21293	0.584053	1	1	0.99701
Annotation Cluster 52	Enrichment Score: 0.023111839696160125
Category	Term	Count	%	PValue	Genes	List Total	Pop Hits	Pop Total	Fold Enrichment	Bonferroni	Benjamini	FDR
INTERPRO	IPR009030:Insulin-like growth factor binding protein, N-terminal	4	0.49505	0.916829	ENSDARG00000010791, ENSDARG00000052895, ENSDARG00000094324, ENSDARG00000089904	739	159	21293	0.724862	1	1	0.99701
INTERPRO	IPR000152:EGF-type aspartate/asparagine hydroxylation site	3	0.371287	0.919035	ENSDARG00000010791, ENSDARG00000094324, ENSDARG00000089904	739	118	21293	0.732541	1	1	0.99701
INTERPRO	IPR018097:EGF-like calcium-binding, conserved site	3	0.371287	0.931848	ENSDARG00000010791, ENSDARG00000094324, ENSDARG00000089904	739	124	21293	0.697095	1	1	0.99701
SMART	SM00179:EGF_CA	3	0.371287	0.955273	ENSDARG00000010791, ENSDARG00000094324, ENSDARG00000089904	392	149	12157	0.624418	1	1	1
SMART	SM00181:EGF	4	0.49505	0.966617	ENSDARG00000010791, ENSDARG00000094324, ENSDARG00000089904, ENSDARG00000075121	392	209	12157	0.593546	1	1	1
INTERPRO	IPR001881:EGF-like calcium-binding	3	0.371287	0.968251	ENSDARG00000010791, ENSDARG00000094324, ENSDARG00000089904	739	150	21293	0.576265	1	1	0.99701
UP_KEYWORDS	EGF-like domain	3	0.371287	0.981481	ENSDARG00000010791, ENSDARG00000094324, ENSDARG00000089904	794	165	22487	0.51493	1	1	0.981481
Annotation Cluster 53	Enrichment Score: 0.01051239612617391
Category	Term	Count	%	PValue	Genes	List Total	Pop Hits	Pop Total	Fold Enrichment	Bonferroni	Benjamini	FDR
SMART	SM00409:IG	14	1.73267	0.958166	ENSDARG00000093074, ENSDARG00000077999, ENSDARG00000053027, ENSDARG00000071662, ENSDARG00000021241, ENSDARG00000087706, ENSDARG00000090882, ENSDARG00000041828, ENSDARG00000034092, ENSDARG00000040178, ENSDARG00000091411, ENSDARG00000003061, ENSDARG00000074818, ENSDARG00000045391	392	607	12157	0.715286	1	1	1
INTERPRO	IPR003599:Immunoglobulin subtype	14	1.73267	0.979064	ENSDARG00000093074, ENSDARG00000077999, ENSDARG00000053027, ENSDARG00000071662, ENSDARG00000021241, ENSDARG00000087706, ENSDARG00000090882, ENSDARG00000041828, ENSDARG00000034092, ENSDARG00000040178, ENSDARG00000091411, ENSDARG00000003061, ENSDARG00000074818, ENSDARG00000045391	739	607	21293	0.664556	1	1	0.99701
INTERPRO	IPR007110:Immunoglobulin-like domain	19	2.35149	0.991314	ENSDARG00000024365, ENSDARG00000093074, ENSDARG00000077999, ENSDARG00000053027, ENSDARG00000071662, ENSDARG00000077337, ENSDARG00000001470, ENSDARG00000021241, ENSDARG00000090396, ENSDARG00000087706, ENSDARG00000090882, ENSDARG00000041828, ENSDARG00000034092, ENSDARG00000040178, ENSDARG00000091411, ENSDARG00000003061, ENSDARG00000077309, ENSDARG00000074818, ENSDARG00000045391	739	841	21293	0.650954	1	1	0.99701
Annotation Cluster 54	Enrichment Score: 0.007452508830308186
Category	Term	Count	%	PValue	Genes	List Total	Pop Hits	Pop Total	Fold Enrichment	Bonferroni	Benjamini	FDR
SMART	SM00248:ANK	5	0.618812	0.9694	ENSDARG00000059883, ENSDARG00000087832, ENSDARG00000076733, ENSDARG00000087152, ENSDARG00000071294	392	259	12157	0.598702	1	1	1
INTERPRO	IPR002110:Ankyrin repeat	5	0.618812	0.982389	ENSDARG00000059883, ENSDARG00000087832, ENSDARG00000076733, ENSDARG00000087152, ENSDARG00000071294	739	263	21293	0.547781	1	1	0.99701
INTERPRO	IPR020683:Ankyrin repeat-containing domain	5	0.618812	0.985647	ENSDARG00000059883, ENSDARG00000087832, ENSDARG00000076733, ENSDARG00000087152, ENSDARG00000071294	739	271	21293	0.53161	1	1	0.99701
UP_KEYWORDS	ANK repeat	4	0.49505	0.994677	ENSDARG00000059883, ENSDARG00000087832, ENSDARG00000076733, ENSDARG00000071294	794	256	22487	0.442518	1	1	0.994677
Annotation Cluster 55	Enrichment Score: 1.7843652263351185E-5
Category	Term	Count	%	PValue	Genes	List Total	Pop Hits	Pop Total	Fold Enrichment	Bonferroni	Benjamini	FDR
INTERPRO	IPR000276:G protein-coupled receptor, rhodopsin-like	10	1.23762	0.999934	ENSDARG00000090524, ENSDARG00000058991, ENSDARG00000031749, ENSDARG00000038541, ENSDARG00000039234, ENSDARG00000038278, ENSDARG00000006079, ENSDARG00000062009, ENSDARG00000086616, ENSDARG00000088124	739	710	21293	0.405821	1	1	0.999934
INTERPRO	IPR017452:GPCR, rhodopsin-like, 7TM	10	1.23762	0.999953	ENSDARG00000090524, ENSDARG00000058991, ENSDARG00000031749, ENSDARG00000038541, ENSDARG00000039234, ENSDARG00000038278, ENSDARG00000006079, ENSDARG00000062009, ENSDARG00000086616, ENSDARG00000088124	739	723	21293	0.398524	1	1	0.999953
GOTERM_MF_DIRECT	GO:0004930~G-protein coupled receptor activity	13	1.60891	0.99996	ENSDARG00000031749, ENSDARG00000025420, ENSDARG00000006079, ENSDARG00000062009, ENSDARG00000089904, ENSDARG00000086616, ENSDARG00000090524, ENSDARG00000058991, ENSDARG00000093008, ENSDARG00000038541, ENSDARG00000039234, ENSDARG00000038278, ENSDARG00000088124	549	860	15797	0.434958	1	1	0.99996
UP_KEYWORDS	G-protein coupled receptor	8	0.990099	0.999989	ENSDARG00000058991, ENSDARG00000031749, ENSDARG00000038541, ENSDARG00000039234, ENSDARG00000038278, ENSDARG00000006079, ENSDARG00000086616, ENSDARG00000088124	794	670	22487	0.338163	1	1	0.999989
Annotation Cluster 56	Enrichment Score: 1.7792939430618534E-8
Category	Term	Count	%	PValue	Genes	List Total	Pop Hits	Pop Total	Fold Enrichment	Bonferroni	Benjamini	FDR
INTERPRO	IPR013087:Zinc finger C2H2-type/integrase DNA-binding domain	6	0.742574	1	ENSDARG00000021086, ENSDARG00000037178, ENSDARG00000031307, ENSDARG00000046019, ENSDARG00000088123, ENSDARG00000087483	739	741	21293	0.233306	1	1	1
SMART	SM00355:ZnF_C2H2	6	0.742574	1	ENSDARG00000021086, ENSDARG00000037178, ENSDARG00000031307, ENSDARG00000046019, ENSDARG00000088123, ENSDARG00000087483	392	800	12157	0.232596	1	1	1
INTERPRO	IPR007087:Zinc finger, C2H2	7	0.866337	1	ENSDARG00000016514, ENSDARG00000021086, ENSDARG00000037178, ENSDARG00000031307, ENSDARG00000046019, ENSDARG00000088123, ENSDARG00000087483	739	842	21293	0.23954	1	1	1
INTERPRO	IPR015880:Zinc finger, C2H2-like	6	0.742574	1	ENSDARG00000021086, ENSDARG00000037178, ENSDARG00000031307, ENSDARG00000046019, ENSDARG00000088123, ENSDARG00000087483	739	800	21293	0.216099	1	1	1
Annotation Cluster 57	Enrichment Score: 3.1874243258128256E-9
Category	Term	Count	%	PValue	Genes	List Total	Pop Hits	Pop Total	Fold Enrichment	Bonferroni	Benjamini	FDR
UP_KEYWORDS	Transmembrane	150	18.5644	1	ENSDARG00000052701, ENSDARG00000056985, ENSDARG00000021241, ENSDARG00000001470, ENSDARG00000058090, ENSDARG00000076870, ENSDARG00000037153, ENSDARG00000089837, ENSDARG00000093008, ENSDARG00000036345, ENSDARG00000094854, ENSDARG00000011724, ENSDARG00000068575, ENSDARG00000090935, ENSDARG00000030006, ENSDARG00000076800, ENSDARG00000055885, ENSDARG00000077337, ENSDARG00000095821, ENSDARG00000006079,…	794	6068	22487	0.700095	1	1	1
UP_KEYWORDS	Transmembrane helix	149	18.4406	1	ENSDARG00000052701, ENSDARG00000056985, ENSDARG00000021241, ENSDARG00000001470, ENSDARG00000058090, ENSDARG00000076870, ENSDARG00000037153, ENSDARG00000089837, ENSDARG00000093008, ENSDARG00000036345, ENSDARG00000094854, ENSDARG00000011724, ENSDARG00000068575, ENSDARG00000090935, ENSDARG00000030006, ENSDARG00000076800, ENSDARG00000055885, ENSDARG00000077337, ENSDARG00000095821, ENSDARG00000006079,…	794	6055	22487	0.69692	1	1	1
UP_KEYWORDS	Membrane	159	19.6782	1	ENSDARG00000052701, ENSDARG00000003375, ENSDARG00000056985, ENSDARG00000021241, ENSDARG00000001470, ENSDARG00000058090, ENSDARG00000076870, ENSDARG00000037153, ENSDARG00000089837, ENSDARG00000093008, ENSDARG00000036345, ENSDARG00000094854, ENSDARG00000011724, ENSDARG00000068575, ENSDARG00000090935, ENSDARG00000030006, ENSDARG00000076800, ENSDARG00000055885, ENSDARG00000077337, ENSDARG00000095821,…	794	6398	22487	0.703824	1	1	1
GOTERM_CC_DIRECT	GO:0016020~membrane	157	19.4307	1	ENSDARG00000052701, ENSDARG00000003375, ENSDARG00000056985, ENSDARG00000021241, ENSDARG00000001470, ENSDARG00000058090, ENSDARG00000076870, ENSDARG00000037153, ENSDARG00000089837, ENSDARG00000093008, ENSDARG00000036345, ENSDARG00000094854, ENSDARG00000011724, ENSDARG00000068575, ENSDARG00000090935, ENSDARG00000030006, ENSDARG00000076800, ENSDARG00000055885, ENSDARG00000077337, ENSDARG00000095821,…	571	6207	15208	0.67368	1	1	1
GOTERM_CC_DIRECT	GO:0016021~integral component of membrane	151	18.6881	1	ENSDARG00000052701, ENSDARG00000056985, ENSDARG00000021241, ENSDARG00000001470, ENSDARG00000058090, ENSDARG00000076870, ENSDARG00000037153, ENSDARG00000089837, ENSDARG00000093008, ENSDARG00000036345, ENSDARG00000094854, ENSDARG00000011724, ENSDARG00000068575, ENSDARG00000090935, ENSDARG00000030006, ENSDARG00000076800, ENSDARG00000055885, ENSDARG00000077337, ENSDARG00000095821, ENSDARG00000006079,…	571	6180	15208	0.650765	1	1	1

## Sheet: clust3_491_DAVID_IDs_High
Annotation Cluster 1	Enrichment Score: 26.819781705144987
Category	Term	Count	%	PValue	Genes	List Total	Pop Hits	Pop Total	Fold Enrichment	Bonferroni	Benjamini	FDR
GOTERM_CC_DIRECT	GO:0005840~ribosome	42	8.55397	2.12187e-31	ENSDARG00000003599, ENSDARG00000029500, ENSDARG00000055996, ENSDARG00000053058, ENSDARG00000043453, ENSDARG00000020197, ENSDARG00000014690, ENSDARG00000037071, ENSDARG00000037350, ENSDARG00000041703, ENSDARG00000093606, ENSDARG00000015128, ENSDARG00000041435, ENSDARG00000015862, ENSDARG00000005791, ENSDARG00000041232, ENSDARG00000035871, ENSDARG00000018334, ENSDARG00000054818, ENSDARG00000013307,…	350	162	15208	11.2652	2.71599e-29	2.71599e-29	2.6099e-29
KEGG_PATHWAY	dre03010:Ribosome	40	8.14664	2.20885e-31	ENSDARG00000003599, ENSDARG00000029500, ENSDARG00000055996, ENSDARG00000053058, ENSDARG00000043453, ENSDARG00000020197, ENSDARG00000014690, ENSDARG00000037071, ENSDARG00000037350, ENSDARG00000015128, ENSDARG00000041435, ENSDARG00000015862, ENSDARG00000005791, ENSDARG00000041232, ENSDARG00000035871, ENSDARG00000018334, ENSDARG00000054818, ENSDARG00000013307, ENSDARG00000036629, ENSDARG00000030602,…	145	134	5405	11.1271	1.72291e-29	1.72291e-29	1.72291e-29
UP_KEYWORDS	Ribosomal protein	36	7.33198	5.57343e-30	ENSDARG00000003599, ENSDARG00000029500, ENSDARG00000055996, ENSDARG00000053058, ENSDARG00000043453, ENSDARG00000020197, ENSDARG00000014690, ENSDARG00000037071, ENSDARG00000037350, ENSDARG00000015128, ENSDARG00000041435, ENSDARG00000015862, ENSDARG00000005791, ENSDARG00000041232, ENSDARG00000035871, ENSDARG00000018334, ENSDARG00000013307, ENSDARG00000036629, ENSDARG00000030602, ENSDARG00000023298,…	481	121	22487	13.9092	9.08469e-28	9.08469e-28	8.97322e-28
GOTERM_MF_DIRECT	GO:0003735~structural constituent of ribosome	40	8.14664	4.41727e-25	ENSDARG00000003599, ENSDARG00000029500, ENSDARG00000055996, ENSDARG00000053058, ENSDARG00000043453, ENSDARG00000020197, ENSDARG00000014690, ENSDARG00000037071, ENSDARG00000037350, ENSDARG00000093606, ENSDARG00000015128, ENSDARG00000041435, ENSDARG00000015862, ENSDARG00000005791, ENSDARG00000041232, ENSDARG00000035871, ENSDARG00000018334, ENSDARG00000054818, ENSDARG00000013307, ENSDARG00000036629,…	347	212	15797	8.58953	1.4312e-22	1.4312e-22	1.4312e-22
UP_KEYWORDS	Ribonucleoprotein	37	7.53564	3.42259e-24	ENSDARG00000003599, ENSDARG00000029500, ENSDARG00000055996, ENSDARG00000053058, ENSDARG00000043453, ENSDARG00000020197, ENSDARG00000014690, ENSDARG00000037071, ENSDARG00000037350, ENSDARG00000015128, ENSDARG00000041435, ENSDARG00000015862, ENSDARG00000005791, ENSDARG00000041232, ENSDARG00000035871, ENSDARG00000018334, ENSDARG00000023160, ENSDARG00000013307, ENSDARG00000036629, ENSDARG00000030602,…	481	186	22487	9.29983	5.57881e-22	2.78941e-22	2.75518e-22
GOTERM_CC_DIRECT	GO:0030529~intracellular ribonucleoprotein complex	38	7.73931	3.05347e-23	ENSDARG00000003599, ENSDARG00000029500, ENSDARG00000055996, ENSDARG00000053058, ENSDARG00000043453, ENSDARG00000020197, ENSDARG00000014690, ENSDARG00000037071, ENSDARG00000037350, ENSDARG00000015128, ENSDARG00000041435, ENSDARG00000015862, ENSDARG00000005791, ENSDARG00000041232, ENSDARG00000035871, ENSDARG00000018334, ENSDARG00000023160, ENSDARG00000013307, ENSDARG00000036629, ENSDARG00000030602,…	350	200	15208	8.25577	3.90844e-21	1.95422e-21	1.87788e-21
Annotation Cluster 2	Enrichment Score: 3.545068462665642
Category	Term	Count	%	PValue	Genes	List Total	Pop Hits	Pop Total	Fold Enrichment	Bonferroni	Benjamini	FDR
GOTERM_CC_DIRECT	GO:0005852~eukaryotic translation initiation factor 3 complex	6	1.222	4.14273e-05	ENSDARG00000059654, ENSDARG00000017445, ENSDARG00000090697, ENSDARG00000077533, ENSDARG00000068289, ENSDARG00000013931	350	18	15208	14.4838	0.00528877	0.000883782	0.000849259
GOTERM_BP_DIRECT	GO:0001731~formation of translation preinitiation complex	6	1.222	0.000147546	ENSDARG00000059654, ENSDARG00000017445, ENSDARG00000090697, ENSDARG00000068289, ENSDARG00000008292, ENSDARG00000013931	343	23	14912	11.3414	0.0909195	0.0246039	0.0244896
GOTERM_CC_DIRECT	GO:0016282~eukaryotic 43S preinitiation complex	5	1.01833	0.000398726	ENSDARG00000059654, ENSDARG00000017445, ENSDARG00000090697, ENSDARG00000068289, ENSDARG00000013931	350	16	15208	13.5786	0.0497661	0.00729099	0.00700619
GOTERM_CC_DIRECT	GO:0033290~eukaryotic 48S preinitiation complex	5	1.01833	0.000646487	ENSDARG00000059654, ENSDARG00000017445, ENSDARG00000090697, ENSDARG00000068289, ENSDARG00000013931	350	18	15208	12.0698	0.0794437	0.0103438	0.00993974
GOTERM_BP_DIRECT	GO:0006446~regulation of translational initiation	5	1.01833	0.00119456	ENSDARG00000059654, ENSDARG00000017445, ENSDARG00000090697, ENSDARG00000068289, ENSDARG00000013931	343	21	14912	10.3512	0.537981	0.128615	0.128018
Annotation Cluster 3	Enrichment Score: 3.4069351821078637
Category	Term	Count	%	PValue	Genes	List Total	Pop Hits	Pop Total	Fold Enrichment	Bonferroni	Benjamini	FDR
GOTERM_CC_DIRECT	GO:0005852~eukaryotic translation initiation factor 3 complex	6	1.222	4.14273e-05	ENSDARG00000059654, ENSDARG00000017445, ENSDARG00000090697, ENSDARG00000077533, ENSDARG00000068289, ENSDARG00000013931	350	18	15208	14.4838	0.00528877	0.000883782	0.000849259
GOTERM_BP_DIRECT	GO:0001731~formation of translation preinitiation complex	6	1.222	0.000147546	ENSDARG00000059654, ENSDARG00000017445, ENSDARG00000090697, ENSDARG00000068289, ENSDARG00000008292, ENSDARG00000013931	343	23	14912	11.3414	0.0909195	0.0246039	0.0244896
UP_KEYWORDS	Initiation factor	7	1.42566	0.000589108	ENSDARG00000059654, ENSDARG00000017445, ENSDARG00000090697, ENSDARG00000077533, ENSDARG00000068289, ENSDARG00000008292, ENSDARG00000013931	481	49	22487	6.67865	0.091584	0.0240062	0.0237116
GOTERM_MF_DIRECT	GO:0003743~translation initiation factor activity	7	1.42566	0.00124105	ENSDARG00000059654, ENSDARG00000017445, ENSDARG00000090697, ENSDARG00000077533, ENSDARG00000068289, ENSDARG00000008292, ENSDARG00000013931	347	55	15797	5.79403	0.331254	0.134034	0.134034
GOTERM_BP_DIRECT	GO:0006413~translational initiation	7	1.42566	0.00206598	ENSDARG00000059654, ENSDARG00000017445, ENSDARG00000090697, ENSDARG00000077533, ENSDARG00000068289, ENSDARG00000008292, ENSDARG00000013931	343	58	14912	5.24701	0.737105	0.19066	0.189775
Annotation Cluster 4	Enrichment Score: 1.5122376799590254
Category	Term	Count	%	PValue	Genes	List Total	Pop Hits	Pop Total	Fold Enrichment	Bonferroni	Benjamini	FDR
GOTERM_MF_DIRECT	GO:0005044~scavenger receptor activity	5	1.01833	0.023634	ENSDARG00000040133, ENSDARG00000037805, ENSDARG00000059294, ENSDARG00000040528, ENSDARG00000076848	347	50	15797	4.55245	0.999569	1	1
SMART	SM00202:SR	4	0.814664	0.0296498	ENSDARG00000037805, ENSDARG00000059294, ENSDARG00000040528, ENSDARG00000076848	267	31	12157	5.87508	0.998669	1	1
INTERPRO	IPR001190:Speract/scavenger receptor	4	0.814664	0.0331114	ENSDARG00000037805, ENSDARG00000059294, ENSDARG00000040528, ENSDARG00000076848	457	33	21293	5.64764	1	1	1
INTERPRO	IPR017448:Speract/scavenger receptor-related	4	0.814664	0.0385047	ENSDARG00000037805, ENSDARG00000059294, ENSDARG00000040528, ENSDARG00000076848	457	35	21293	5.32491	1	1	1
Annotation Cluster 5	Enrichment Score: 1.375551819570433
Category	Term	Count	%	PValue	Genes	List Total	Pop Hits	Pop Total	Fold Enrichment	Bonferroni	Benjamini	FDR
INTERPRO	IPR019471:Interferon regulatory factor-3	3	0.610998	0.0221475	ENSDARG00000056407, ENSDARG00000045681, ENSDARG00000027658	457	11	21293	12.7072	1	1	1
INTERPRO	IPR019817:Interferon regulatory factor, conserved site	3	0.610998	0.0221475	ENSDARG00000056407, ENSDARG00000045681, ENSDARG00000027658	457	11	21293	12.7072	1	1	1
SMART	SM01243:SM01243	3	0.610998	0.023029	ENSDARG00000056407, ENSDARG00000045681, ENSDARG00000027658	267	11	12157	12.4178	0.994057	1	1
INTERPRO	IPR001346:Interferon regulatory factor DNA-binding domain	3	0.610998	0.0305374	ENSDARG00000056407, ENSDARG00000045681, ENSDARG00000027658	457	13	21293	10.7522	1	1	1
SMART	SM00348:IRF	3	0.610998	0.0317363	ENSDARG00000056407, ENSDARG00000045681, ENSDARG00000027658	267	13	12157	10.5073	0.999171	1	1
GOTERM_MF_DIRECT	GO:0000975~regulatory region DNA binding	3	0.610998	0.0523909	ENSDARG00000056407, ENSDARG00000045681, ENSDARG00000027658	347	17	15797	8.03373	1	1	1
INTERPRO	IPR017855:SMAD domain-like	3	0.610998	0.086185	ENSDARG00000056407, ENSDARG00000045681, ENSDARG00000027658	457	23	21293	6.07735	1	1	1
INTERPRO	IPR008984:SMAD/FHA domain	4	0.814664	0.200257	ENSDARG00000056407, ENSDARG00000045681, ENSDARG00000091150, ENSDARG00000027658	457	72	21293	2.5885	1	1	1
Annotation Cluster 6	Enrichment Score: 1.2025431450553097
Category	Term	Count	%	PValue	Genes	List Total	Pop Hits	Pop Total	Fold Enrichment	Bonferroni	Benjamini	FDR
INTERPRO	IPR001930:Peptidase M1, alanine aminopeptidase/leukotriene A4 hydrolase	3	0.610998	0.0450474	ENSDARG00000021859, ENSDARG00000006029, ENSDARG00000068461	457	16	21293	8.73619	1	1	1
INTERPRO	IPR014782:Peptidase M1, membrane alanine aminopeptidase, N-terminal	3	0.610998	0.0503463	ENSDARG00000021859, ENSDARG00000006029, ENSDARG00000068461	457	17	21293	8.22229	1	1	1
GOTERM_MF_DIRECT	GO:0042277~peptide binding	4	0.814664	0.0533277	ENSDARG00000021859, ENSDARG00000006029, ENSDARG00000068461, ENSDARG00000053858	347	39	15797	4.66918	1	1	1
GOTERM_MF_DIRECT	GO:0070006~metalloaminopeptidase activity	3	0.610998	0.0895287	ENSDARG00000021859, ENSDARG00000006029, ENSDARG00000068461	347	23	15797	5.93798	1	1	1
GOTERM_BP_DIRECT	GO:0043171~peptide catabolic process	3	0.610998	0.0896873	ENSDARG00000021859, ENSDARG00000006029, ENSDARG00000068461	343	22	14912	5.92844	1	1	0.996899
Annotation Cluster 7	Enrichment Score: 1.191929195493841
Category	Term	Count	%	PValue	Genes	List Total	Pop Hits	Pop Total	Fold Enrichment	Bonferroni	Benjamini	FDR
UP_KEYWORDS	LIM domain	6	1.222	0.0609835	ENSDARG00000002002, ENSDARG00000071113, ENSDARG00000077842, ENSDARG00000023578, ENSDARG00000006603, ENSDARG00000053858	481	99	22487	2.83336	0.999965	0.907111	0.895981
INTERPRO	IPR001781:Zinc finger, LIM-type	6	1.222	0.0638036	ENSDARG00000002002, ENSDARG00000071113, ENSDARG00000077842, ENSDARG00000023578, ENSDARG00000006603, ENSDARG00000053858	457	100	21293	2.79558	1	1	1
SMART	SM00132:LIM	6	1.222	0.0682582	ENSDARG00000002002, ENSDARG00000071113, ENSDARG00000077842, ENSDARG00000023578, ENSDARG00000006603, ENSDARG00000053858	267	100	12157	2.73191	1	1	1
Annotation Cluster 8	Enrichment Score: 1.098845547331444
Category	Term	Count	%	PValue	Genes	List Total	Pop Hits	Pop Total	Fold Enrichment	Bonferroni	Benjamini	FDR
UP_KEYWORDS	Annexin	3	0.610998	0.0612161	ENSDARG00000036456, ENSDARG00000016470, ENSDARG00000026726	481	19	22487	7.38166	0.999966	0.907111	0.895981
UP_KEYWORDS	Calcium/phospholipid-binding	3	0.610998	0.0612161	ENSDARG00000036456, ENSDARG00000016470, ENSDARG00000026726	481	19	22487	7.38166	0.999966	0.907111	0.895981
INTERPRO	IPR018252:Annexin repeat, conserved site	3	0.610998	0.0615657	ENSDARG00000036456, ENSDARG00000016470, ENSDARG00000026726	457	19	21293	7.35679	1	1	1
INTERPRO	IPR018502:Annexin repeat	3	0.610998	0.0615657	ENSDARG00000036456, ENSDARG00000016470, ENSDARG00000026726	457	19	21293	7.35679	1	1	1
INTERPRO	IPR001464:Annexin	3	0.610998	0.0615657	ENSDARG00000036456, ENSDARG00000016470, ENSDARG00000026726	457	19	21293	7.35679	1	1	1
SMART	SM00335:ANX	3	0.610998	0.0638832	ENSDARG00000036456, ENSDARG00000016470, ENSDARG00000026726	267	19	12157	7.18924	1	1	1
GOTERM_MF_DIRECT	GO:0005544~calcium-dependent phospholipid binding	3	0.610998	0.36387	ENSDARG00000036456, ENSDARG00000016470, ENSDARG00000026726	347	58	15797	2.35472	1	1	1
Annotation Cluster 9	Enrichment Score: 1.0814228706171904
Category	Term	Count	%	PValue	Genes	List Total	Pop Hits	Pop Total	Fold Enrichment	Bonferroni	Benjamini	FDR
INTERPRO	IPR000198:Rho GTPase-activating protein domain	6	1.222	0.042366	ENSDARG00000078119, ENSDARG00000032161, ENSDARG00000083189, ENSDARG00000018165, ENSDARG00000039265, ENSDARG00000017748	457	89	21293	3.1411	1	1	1
INTERPRO	IPR008936:Rho GTPase activation protein	6	1.222	0.11265	ENSDARG00000078119, ENSDARG00000032161, ENSDARG00000083189, ENSDARG00000018165, ENSDARG00000039265, ENSDARG00000017748	457	119	21293	2.34923	1	1	1
SMART	SM00324:RhoGAP	5	1.01833	0.119394	ENSDARG00000078119, ENSDARG00000032161, ENSDARG00000083189, ENSDARG00000039265, ENSDARG00000017748	267	86	12157	2.6472	1	1	1
Annotation Cluster 10	Enrichment Score: 0.9463209108474228
Category	Term	Count	%	PValue	Genes	List Total	Pop Hits	Pop Total	Fold Enrichment	Bonferroni	Benjamini	FDR
INTERPRO	IPR021158:Peptidase M10A, cysteine switch, zinc binding site	3	0.610998	0.00894876	ENSDARG00000017676, ENSDARG00000008388, ENSDARG00000042816	457	7	21293	19.9684	0.999536	1	1
INTERPRO	IPR002477:Peptidoglycan binding-like	3	0.610998	0.0674639	ENSDARG00000017676, ENSDARG00000008388, ENSDARG00000042816	457	20	21293	6.98895	1	1	1
INTERPRO	IPR001818:Peptidase M10, metallopeptidase	3	0.610998	0.0927345	ENSDARG00000017676, ENSDARG00000008388, ENSDARG00000042816	457	24	21293	5.82412	1	1	1
INTERPRO	IPR021190:Peptidase M10A	3	0.610998	0.0927345	ENSDARG00000017676, ENSDARG00000008388, ENSDARG00000042816	457	24	21293	5.82412	1	1	1
INTERPRO	IPR018487:Hemopexin-like repeats	3	0.610998	0.120234	ENSDARG00000017676, ENSDARG00000008388, ENSDARG00000042816	457	28	21293	4.99211	1	1	1
INTERPRO	IPR000585:Hemopexin-like domain	3	0.610998	0.120234	ENSDARG00000017676, ENSDARG00000008388, ENSDARG00000042816	457	28	21293	4.99211	1	1	1
SMART	SM00120:HX	3	0.610998	0.124475	ENSDARG00000017676, ENSDARG00000008388, ENSDARG00000042816	267	28	12157	4.87841	1	1	1
UP_KEYWORDS	Metalloprotease	4	0.814664	0.172095	ENSDARG00000017676, ENSDARG00000008388, ENSDARG00000006029, ENSDARG00000042816	481	67	22487	2.79108	1	1	0.993827
INTERPRO	IPR006026:Peptidase, metallopeptidase	3	0.610998	0.211047	ENSDARG00000017676, ENSDARG00000008388, ENSDARG00000042816	457	40	21293	3.49447	1	1	1
SMART	SM00235:ZnMc	3	0.610998	0.21785	ENSDARG00000017676, ENSDARG00000008388, ENSDARG00000042816	267	40	12157	3.41489	1	1	1
INTERPRO	IPR024079:Metallopeptidase, catalytic domain	3	0.610998	0.526883	ENSDARG00000017676, ENSDARG00000008388, ENSDARG00000042816	457	82	21293	1.70462	1	1	1
Annotation Cluster 11	Enrichment Score: 0.930954902359184
Category	Term	Count	%	PValue	Genes	List Total	Pop Hits	Pop Total	Fold Enrichment	Bonferroni	Benjamini	FDR
UP_KEYWORDS	Elongation factor	3	0.610998	0.0857096	ENSDARG00000056119, ENSDARG00000044521, ENSDARG00000020850	481	23	22487	6.09789	1	1	0.993827
GOTERM_MF_DIRECT	GO:0003746~translation elongation factor activity	3	0.610998	0.132109	ENSDARG00000056119, ENSDARG00000044521, ENSDARG00000020850	347	29	15797	4.70943	1	1	1
GOTERM_BP_DIRECT	GO:0006414~translational elongation	3	0.610998	0.14229	ENSDARG00000056119, ENSDARG00000044521, ENSDARG00000020850	343	29	14912	4.49744	1	1	0.996899
Annotation Cluster 12	Enrichment Score: 0.8976943952311653
Category	Term	Count	%	PValue	Genes	List Total	Pop Hits	Pop Total	Fold Enrichment	Bonferroni	Benjamini	FDR
INTERPRO	IPR000169:Cysteine peptidase, cysteine active site	4	0.814664	0.0792916	ENSDARG00000013771, ENSDARG00000040251, ENSDARG00000055592, ENSDARG00000041108	457	47	21293	3.96536	1	1	1
INTERPRO	IPR025661:Cysteine peptidase, asparagine active site	3	0.610998	0.113181	ENSDARG00000013771, ENSDARG00000040251, ENSDARG00000041108	457	27	21293	5.177	1	1	1
INTERPRO	IPR025660:Cysteine peptidase, histidine active site	3	0.610998	0.120234	ENSDARG00000013771, ENSDARG00000040251, ENSDARG00000041108	457	28	21293	4.99211	1	1	1
INTERPRO	IPR013201:Proteinase inhibitor I29, cathepsin propeptide	3	0.610998	0.127392	ENSDARG00000013771, ENSDARG00000040251, ENSDARG00000041108	457	29	21293	4.81997	1	1	1
SMART	SM00848:SM00848	3	0.610998	0.131852	ENSDARG00000013771, ENSDARG00000040251, ENSDARG00000041108	267	29	12157	4.71019	1	1	1
INTERPRO	IPR000668:Peptidase C1A, papain C-terminal	3	0.610998	0.134647	ENSDARG00000013771, ENSDARG00000040251, ENSDARG00000041108	457	30	21293	4.6593	1	1	1
SMART	SM00645:Pept_C1	3	0.610998	0.139327	ENSDARG00000013771, ENSDARG00000040251, ENSDARG00000041108	267	30	12157	4.55318	1	1	1
GOTERM_BP_DIRECT	GO:0051603~proteolysis involved in cellular protein catabolic process	4	0.814664	0.142365	ENSDARG00000013771, ENSDARG00000040251, ENSDARG00000001303, ENSDARG00000041108	343	57	14912	3.05089	1	1	0.996899
INTERPRO	IPR013128:Peptidase C1A, papain	3	0.610998	0.172132	ENSDARG00000013771, ENSDARG00000040251, ENSDARG00000041108	457	35	21293	3.99369	1	1	1
Annotation Cluster 13	Enrichment Score: 0.8959366161420453
Category	Term	Count	%	PValue	Genes	List Total	Pop Hits	Pop Total	Fold Enrichment	Bonferroni	Benjamini	FDR
INTERPRO	IPR000355:Chemokine receptor family	3	0.610998	0.0797836	ENSDARG00000040133, ENSDARG00000057633, ENSDARG00000055186	457	22	21293	6.35359	1	1	1
GOTERM_MF_DIRECT	GO:0004950~chemokine receptor activity	3	0.610998	0.0829029	ENSDARG00000040133, ENSDARG00000057633, ENSDARG00000055186	347	22	15797	6.20789	1	1	1
GOTERM_BP_DIRECT	GO:0006935~chemotaxis	3	0.610998	0.310247	ENSDARG00000040133, ENSDARG00000057633, ENSDARG00000055186	343	49	14912	2.66175	1	1	0.996899
Annotation Cluster 14	Enrichment Score: 0.8778963575252909
Category	Term	Count	%	PValue	Genes	List Total	Pop Hits	Pop Total	Fold Enrichment	Bonferroni	Benjamini	FDR
INTERPRO	IPR003599:Immunoglobulin subtype	19	3.86965	0.103518	ENSDARG00000090190, ENSDARG00000045011, ENSDARG00000071463, ENSDARG00000024775, ENSDARG00000096576, ENSDARG00000093686, ENSDARG00000079762, ENSDARG00000006456, ENSDARG00000005368, ENSDARG00000079175, ENSDARG00000076144, ENSDARG00000091692, ENSDARG00000079353, ENSDARG00000027867, ENSDARG00000058351, ENSDARG00000076539, ENSDARG00000011863, ENSDARG00000071648, ENSDARG00000079808	457	607	21293	1.45843	1	1	1
SMART	SM00409:IG	19	3.86965	0.116637	ENSDARG00000090190, ENSDARG00000045011, ENSDARG00000071463, ENSDARG00000024775, ENSDARG00000096576, ENSDARG00000093686, ENSDARG00000079762, ENSDARG00000006456, ENSDARG00000005368, ENSDARG00000079175, ENSDARG00000076144, ENSDARG00000091692, ENSDARG00000079353, ENSDARG00000027867, ENSDARG00000058351, ENSDARG00000076539, ENSDARG00000011863, ENSDARG00000071648, ENSDARG00000079808	267	607	12157	1.42521	1	1	1
INTERPRO	IPR007110:Immunoglobulin-like domain	23	4.68432	0.192512	ENSDARG00000090190, ENSDARG00000045011, ENSDARG00000071463, ENSDARG00000024775, ENSDARG00000096576, ENSDARG00000093686, ENSDARG00000079762, ENSDARG00000006456, ENSDARG00000005368, ENSDARG00000079175, ENSDARG00000076144, ENSDARG00000091692, ENSDARG00000079353, ENSDARG00000027867, ENSDARG00000076483, ENSDARG00000058351, ENSDARG00000045959, ENSDARG00000068784, ENSDARG00000076539, ENSDARG00000011863,…	457	841	21293	1.27424	1	1	1
Annotation Cluster 15	Enrichment Score: 0.8743783318803336
Category	Term	Count	%	PValue	Genes	List Total	Pop Hits	Pop Total	Fold Enrichment	Bonferroni	Benjamini	FDR
INTERPRO	IPR011705:BTB/Kelch-associated	5	1.01833	0.0658661	ENSDARG00000026990, ENSDARG00000067751, ENSDARG00000037805, ENSDARG00000040528, ENSDARG00000076848	457	71	21293	3.2812	1	1	1
SMART	SM00875:SM00875	5	1.01833	0.0698517	ENSDARG00000026990, ENSDARG00000067751, ENSDARG00000037805, ENSDARG00000040528, ENSDARG00000076848	267	71	12157	3.20647	1	1	1
INTERPRO	IPR011333:BTB/POZ fold	6	1.222	0.517638	ENSDARG00000026990, ENSDARG00000053542, ENSDARG00000067751, ENSDARG00000037805, ENSDARG00000040528, ENSDARG00000076848	457	220	21293	1.27072	1	1	1
Annotation Cluster 16	Enrichment Score: 0.8157657562135832
Category	Term	Count	%	PValue	Genes	List Total	Pop Hits	Pop Total	Fold Enrichment	Bonferroni	Benjamini	FDR
GOTERM_BP_DIRECT	GO:0043410~positive regulation of MAPK cascade	3	0.610998	0.0967935	ENSDARG00000060498, ENSDARG00000018569, ENSDARG00000054968	343	23	14912	5.67068	1	1	0.996899
GOTERM_MF_DIRECT	GO:0005031~tumor necrosis factor-activated receptor activity	3	0.610998	0.103221	ENSDARG00000060498, ENSDARG00000018569, ENSDARG00000054968	347	25	15797	5.46294	1	1	1
SMART	SM00208:TNFR	3	0.610998	0.146891	ENSDARG00000060498, ENSDARG00000018569, ENSDARG00000054968	267	31	12157	4.40631	1	1	1
GOTERM_BP_DIRECT	GO:0097190~apoptotic signaling pathway	3	0.610998	0.158313	ENSDARG00000060498, ENSDARG00000018569, ENSDARG00000054968	343	31	14912	4.20728	1	1	0.996899
INTERPRO	IPR001368:TNFR/NGFR cysteine-rich region	3	0.610998	0.172132	ENSDARG00000060498, ENSDARG00000018569, ENSDARG00000054968	457	35	21293	3.99369	1	1	1
GOTERM_BP_DIRECT	GO:0032496~response to lipopolysaccharide	3	0.610998	0.318725	ENSDARG00000060498, ENSDARG00000018569, ENSDARG00000054968	343	50	14912	2.60851	1	1	0.996899
Annotation Cluster 17	Enrichment Score: 0.5796768636156815
Category	Term	Count	%	PValue	Genes	List Total	Pop Hits	Pop Total	Fold Enrichment	Bonferroni	Benjamini	FDR
INTERPRO	IPR000463:Cytosolic fatty-acid binding	3	0.610998	0.0927345	ENSDARG00000045926, ENSDARG00000018077, ENSDARG00000007697	457	24	21293	5.82412	1	1	1
INTERPRO	IPR000566:Lipocalin/cytosolic fatty-acid binding protein domain	3	0.610998	0.141992	ENSDARG00000045926, ENSDARG00000018077, ENSDARG00000007697	457	31	21293	4.509	1	1	1
INTERPRO	IPR012674:Calycin	3	0.610998	0.203185	ENSDARG00000045926, ENSDARG00000018077, ENSDARG00000007697	457	39	21293	3.58408	1	1	1
INTERPRO	IPR011038:Calycin-like	3	0.610998	0.211047	ENSDARG00000045926, ENSDARG00000018077, ENSDARG00000007697	457	40	21293	3.49447	1	1	1
GOTERM_MF_DIRECT	GO:0008289~lipid binding	3	0.610998	0.683441	ENSDARG00000045926, ENSDARG00000018077, ENSDARG00000007697	347	107	15797	1.27639	1	1	1
GOTERM_MF_DIRECT	GO:0005215~transporter activity	4	0.814664	0.86191	ENSDARG00000045926, ENSDARG00000069518, ENSDARG00000018077, ENSDARG00000007697	347	219	15797	0.831498	1	1	1
Annotation Cluster 18	Enrichment Score: 0.5681864423608363
Category	Term	Count	%	PValue	Genes	List Total	Pop Hits	Pop Total	Fold Enrichment	Bonferroni	Benjamini	FDR
PIR_SUPERFAMILY	PIRSF002419:tetraspanin	3	0.610998	0.23824	ENSDARG00000095090, ENSDARG00000026070, ENSDARG00000055938	42	39	1717	3.14469	0.999975	1	1
INTERPRO	IPR000301:Tetraspanin	3	0.610998	0.258676	ENSDARG00000095090, ENSDARG00000026070, ENSDARG00000055938	457	46	21293	3.03867	1	1	1
INTERPRO	IPR008952:Tetraspanin, EC2 domain	3	0.610998	0.282588	ENSDARG00000095090, ENSDARG00000026070, ENSDARG00000055938	457	49	21293	2.85263	1	1	1
INTERPRO	IPR018499:Tetraspanin/Peripherin	3	0.610998	0.30643	ENSDARG00000095090, ENSDARG00000026070, ENSDARG00000055938	457	52	21293	2.68806	1	1	1
Annotation Cluster 19	Enrichment Score: 0.5074240814411747
Category	Term	Count	%	PValue	Genes	List Total	Pop Hits	Pop Total	Fold Enrichment	Bonferroni	Benjamini	FDR
INTERPRO	IPR008983:Tumour necrosis factor-like domain	4	0.814664	0.233861	ENSDARG00000019521, ENSDARG00000044613, ENSDARG00000069376, ENSDARG00000024537	457	78	21293	2.38938	1	1	1
SMART	SM00110:C1Q	3	0.610998	0.35552	ENSDARG00000019521, ENSDARG00000044613, ENSDARG00000024537	267	57	12157	2.39641	1	1	1
INTERPRO	IPR001073:Complement C1q protein	3	0.610998	0.361331	ENSDARG00000019521, ENSDARG00000044613, ENSDARG00000024537	457	59	21293	2.36914	1	1	1
Annotation Cluster 20	Enrichment Score: 0.47602599421110814
Category	Term	Count	%	PValue	Genes	List Total	Pop Hits	Pop Total	Fold Enrichment	Bonferroni	Benjamini	FDR
INTERPRO	IPR001589:Actinin-type, actin-binding, conserved site	3	0.610998	0.127392	ENSDARG00000074201, ENSDARG00000037655, ENSDARG00000018566	457	29	21293	4.81997	1	1	1
GOTERM_MF_DIRECT	GO:0051015~actin filament binding	4	0.814664	0.279446	ENSDARG00000074201, ENSDARG00000037655, ENSDARG00000018566, ENSDARG00000059680	347	84	15797	2.16783	1	1	1
SMART	SM00033:CH	3	0.610998	0.551909	ENSDARG00000074201, ENSDARG00000037655, ENSDARG00000018566	267	84	12157	1.62614	1	1	1
INTERPRO	IPR001715:Calponin homology domain	3	0.610998	0.634731	ENSDARG00000074201, ENSDARG00000037655, ENSDARG00000018566	457	100	21293	1.39779	1	1	1
Annotation Cluster 21	Enrichment Score: 0.4739525615773208
Category	Term	Count	%	PValue	Genes	List Total	Pop Hits	Pop Total	Fold Enrichment	Bonferroni	Benjamini	FDR
UP_KEYWORDS	ANK repeat	8	1.62933	0.306702	ENSDARG00000038687, ENSDARG00000039974, ENSDARG00000043130, ENSDARG00000061941, ENSDARG00000005481, ENSDARG00000016730, ENSDARG00000068367, ENSDARG00000076651	481	256	22487	1.46095	1	1	0.993827
INTERPRO	IPR002110:Ankyrin repeat	8	1.62933	0.334544	ENSDARG00000038687, ENSDARG00000039974, ENSDARG00000043130, ENSDARG00000061941, ENSDARG00000005481, ENSDARG00000016730, ENSDARG00000068367, ENSDARG00000076651	457	263	21293	1.41728	1	1	1
SMART	SM00248:ANK	8	1.62933	0.34131	ENSDARG00000038687, ENSDARG00000039974, ENSDARG00000043130, ENSDARG00000061941, ENSDARG00000005481, ENSDARG00000016730, ENSDARG00000068367, ENSDARG00000076651	267	259	12157	1.40639	1	1	1
INTERPRO	IPR020683:Ankyrin repeat-containing domain	8	1.62933	0.362971	ENSDARG00000038687, ENSDARG00000039974, ENSDARG00000043130, ENSDARG00000061941, ENSDARG00000005481, ENSDARG00000016730, ENSDARG00000068367, ENSDARG00000076651	457	271	21293	1.37544	1	1	1
Annotation Cluster 22	Enrichment Score: 0.45969059141328644
Category	Term	Count	%	PValue	Genes	List Total	Pop Hits	Pop Total	Fold Enrichment	Bonferroni	Benjamini	FDR
INTERPRO	IPR019775:WD40 repeat, conserved site	7	1.42566	0.167816	ENSDARG00000058871, ENSDARG00000017445, ENSDARG00000013153, ENSDARG00000021110, ENSDARG00000041619, ENSDARG00000023160, ENSDARG00000016903	457	173	21293	1.88527	1	1	1
INTERPRO	IPR017986:WD40-repeat-containing domain	9	1.83299	0.305678	ENSDARG00000058871, ENSDARG00000017445, ENSDARG00000013153, ENSDARG00000021110, ENSDARG00000041619, ENSDARG00000076716, ENSDARG00000023160, ENSDARG00000016903, ENSDARG00000071062	457	298	21293	1.40717	1	1	1
INTERPRO	IPR001680:WD40 repeat	7	1.42566	0.526735	ENSDARG00000058871, ENSDARG00000017445, ENSDARG00000013153, ENSDARG00000021110, ENSDARG00000041619, ENSDARG00000023160, ENSDARG00000016903	457	271	21293	1.20351	1	1	1
SMART	SM00320:WD40	7	1.42566	0.536472	ENSDARG00000058871, ENSDARG00000017445, ENSDARG00000013153, ENSDARG00000021110, ENSDARG00000041619, ENSDARG00000023160, ENSDARG00000016903	267	269	12157	1.18484	1	1	1
Annotation Cluster 23	Enrichment Score: 0.42526893850664316
Category	Term	Count	%	PValue	Genes	List Total	Pop Hits	Pop Total	Fold Enrichment	Bonferroni	Benjamini	FDR
UP_KEYWORDS	Helicase	4	0.814664	0.156504	ENSDARG00000057683, ENSDARG00000073721, ENSDARG00000013528, ENSDARG00000020289	481	64	22487	2.92191	1	1	0.993827
GOTERM_MF_DIRECT	GO:0004386~helicase activity	4	0.814664	0.255693	ENSDARG00000057683, ENSDARG00000073721, ENSDARG00000013528, ENSDARG00000020289	347	80	15797	2.27622	1	1	1
UP_KEYWORDS	DNA repair	3	0.610998	0.477777	ENSDARG00000073721, ENSDARG00000013528, ENSDARG00000020289	481	75	22487	1.87002	1	1	0.993827
UP_KEYWORDS	DNA damage	3	0.610998	0.538078	ENSDARG00000073721, ENSDARG00000013528, ENSDARG00000020289	481	84	22487	1.66966	1	1	0.993827
GOTERM_BP_DIRECT	GO:0006974~cellular response to DNA damage stimulus	3	0.610998	0.726677	ENSDARG00000073721, ENSDARG00000013528, ENSDARG00000020289	343	111	14912	1.17501	1	1	0.996899
Annotation Cluster 24	Enrichment Score: 0.34749465284114645
Category	Term	Count	%	PValue	Genes	List Total	Pop Hits	Pop Total	Fold Enrichment	Bonferroni	Benjamini	FDR
UP_KEYWORDS	SH3 domain	6	1.222	0.327254	ENSDARG00000032161, ENSDARG00000000906, ENSDARG00000062837, ENSDARG00000039265, ENSDARG00000004378, ENSDARG00000040812	481	177	22487	1.58476	1	1	0.993827
SMART	SM00326:SH3	7	1.42566	0.49481	ENSDARG00000032161, ENSDARG00000000906, ENSDARG00000044694, ENSDARG00000062837, ENSDARG00000039265, ENSDARG00000004378, ENSDARG00000040812	267	257	12157	1.24017	1	1	1
INTERPRO	IPR001452:Src homology-3 domain	7	1.42566	0.560006	ENSDARG00000032161, ENSDARG00000000906, ENSDARG00000044694, ENSDARG00000062837, ENSDARG00000039265, ENSDARG00000004378, ENSDARG00000040812	457	281	21293	1.16068	1	1	1
Annotation Cluster 25	Enrichment Score: 0.3102209173221741
Category	Term	Count	%	PValue	Genes	List Total	Pop Hits	Pop Total	Fold Enrichment	Bonferroni	Benjamini	FDR
GOTERM_BP_DIRECT	GO:0038083~peptidyl-tyrosine autophosphorylation	3	0.610998	0.224955	ENSDARG00000010252, ENSDARG00000008186, ENSDARG00000004378	343	39	14912	3.34425	1	1	0.996899
GOTERM_CC_DIRECT	GO:0031234~extrinsic component of cytoplasmic side of plasma membrane	3	0.610998	0.250737	ENSDARG00000010252, ENSDARG00000008186, ENSDARG00000004378	350	42	15208	3.10367	1	1	0.968504
GOTERM_MF_DIRECT	GO:0004715~non-membrane spanning protein tyrosine kinase activity	3	0.610998	0.283332	ENSDARG00000010252, ENSDARG00000008186, ENSDARG00000004378	347	48	15797	2.84528	1	1	1
INTERPRO	IPR008266:Tyrosine-protein kinase, active site	4	0.814664	0.470438	ENSDARG00000010252, ENSDARG00000008186, ENSDARG00000011863, ENSDARG00000004378	457	119	21293	1.56615	1	1	1
SMART	SM00252:SH2	4	0.814664	0.512398	ENSDARG00000010252, ENSDARG00000008186, ENSDARG00000021982, ENSDARG00000004378	267	124	12157	1.46877	1	1	1
INTERPRO	IPR000980:SH2 domain	4	0.814664	0.564841	ENSDARG00000010252, ENSDARG00000008186, ENSDARG00000021982, ENSDARG00000004378	457	137	21293	1.36038	1	1	1
UP_KEYWORDS	Tyrosine-protein kinase	3	0.610998	0.581552	ENSDARG00000010252, ENSDARG00000008186, ENSDARG00000004378	481	91	22487	1.54123	1	1	0.993827
INTERPRO	IPR020635:Tyrosine-protein kinase, catalytic domain	3	0.610998	0.655918	ENSDARG00000010252, ENSDARG00000008186, ENSDARG00000004378	457	104	21293	1.34403	1	1	1
SMART	SM00219:TyrKc	3	0.610998	0.668038	ENSDARG00000010252, ENSDARG00000008186, ENSDARG00000004378	267	104	12157	1.31342	1	1	1
GOTERM_BP_DIRECT	GO:0007169~transmembrane receptor protein tyrosine kinase signaling pathway	3	0.610998	0.682641	ENSDARG00000010252, ENSDARG00000008186, ENSDARG00000004378	343	102	14912	1.27868	1	1	0.996899
GOTERM_MF_DIRECT	GO:0004713~protein tyrosine kinase activity	3	0.610998	0.688362	ENSDARG00000010252, ENSDARG00000008186, ENSDARG00000004378	347	108	15797	1.26457	1	1	1
INTERPRO	IPR001245:Serine-threonine/tyrosine-protein kinase catalytic domain	4	0.814664	0.726868	ENSDARG00000010252, ENSDARG00000008186, ENSDARG00000011863, ENSDARG00000004378	457	175	21293	1.06498	1	1	1
Annotation Cluster 26	Enrichment Score: 0.19695424895518232
Category	Term	Count	%	PValue	Genes	List Total	Pop Hits	Pop Total	Fold Enrichment	Bonferroni	Benjamini	FDR
UP_KEYWORDS	Mitosis	3	0.610998	0.382829	ENSDARG00000039020, ENSDARG00000011510, ENSDARG00000002403	481	62	22487	2.26212	1	1	0.993827
GOTERM_BP_DIRECT	GO:0007067~mitotic nuclear division	3	0.610998	0.557661	ENSDARG00000039020, ENSDARG00000011510, ENSDARG00000002403	343	81	14912	1.61019	1	1	0.996899
UP_KEYWORDS	Cell division	3	0.610998	0.616362	ENSDARG00000039020, ENSDARG00000011510, ENSDARG00000002403	481	97	22487	1.44589	1	1	0.993827
GOTERM_BP_DIRECT	GO:0051301~cell division	3	0.610998	0.702888	ENSDARG00000039020, ENSDARG00000011510, ENSDARG00000002403	343	106	14912	1.23043	1	1	0.996899
UP_KEYWORDS	Cell cycle	3	0.610998	0.800028	ENSDARG00000039020, ENSDARG00000011510, ENSDARG00000002403	481	139	22487	1.009	1	1	0.993827
GOTERM_BP_DIRECT	GO:0007049~cell cycle	3	0.610998	0.889349	ENSDARG00000039020, ENSDARG00000011510, ENSDARG00000002403	343	162	14912	0.805097	1	1	0.996899
Annotation Cluster 27	Enrichment Score: 0.1812981590015107
Category	Term	Count	%	PValue	Genes	List Total	Pop Hits	Pop Total	Fold Enrichment	Bonferroni	Benjamini	FDR
INTERPRO	IPR001965:Zinc finger, PHD-type	3	0.610998	0.645449	ENSDARG00000086126, ENSDARG00000038133, ENSDARG00000001313	457	102	21293	1.37038	1	1	1
SMART	SM00249:PHD	3	0.610998	0.657609	ENSDARG00000086126, ENSDARG00000038133, ENSDARG00000001313	267	102	12157	1.33917	1	1	1
INTERPRO	IPR011011:Zinc finger, FYVE/PHD-type	4	0.814664	0.673403	ENSDARG00000086126, ENSDARG00000036791, ENSDARG00000038133, ENSDARG00000001313	457	161	21293	1.15759	1	1	1
Annotation Cluster 28	Enrichment Score: 0.14678657653749594
Category	Term	Count	%	PValue	Genes	List Total	Pop Hits	Pop Total	Fold Enrichment	Bonferroni	Benjamini	FDR
GOTERM_MF_DIRECT	GO:0000977~RNA polymerase II regulatory region sequence-specific DNA binding	3	0.610998	0.56507	ENSDARG00000038687, ENSDARG00000038133, ENSDARG00000055276	347	86	15797	1.58806	1	1	1
GOTERM_BP_DIRECT	GO:0000122~negative regulation of transcription from RNA polymerase II promoter	3	0.610998	0.773378	ENSDARG00000038687, ENSDARG00000038133, ENSDARG00000055276	343	122	14912	1.06906	1	1	0.996899
GOTERM_MF_DIRECT	GO:0003682~chromatin binding	3	0.610998	0.83013	ENSDARG00000038687, ENSDARG00000038133, ENSDARG00000055276	347	145	15797	0.941886	1	1	1
Annotation Cluster 29	Enrichment Score: 0.07321087428647162
Category	Term	Count	%	PValue	Genes	List Total	Pop Hits	Pop Total	Fold Enrichment	Bonferroni	Benjamini	FDR
UP_KEYWORDS	Kinase	13	2.64766	0.786263	ENSDARG00000023584, ENSDARG00000056713, ENSDARG00000022213, ENSDARG00000004378, ENSDARG00000008803, ENSDARG00000010252, ENSDARG00000008186, ENSDARG00000043705, ENSDARG00000000906, ENSDARG00000010059, ENSDARG00000014348, ENSDARG00000070606, ENSDARG00000018516	481	679	22487	0.895076	1	1	0.993827
GOTERM_MF_DIRECT	GO:0016301~kinase activity	12	2.44399	0.862143	ENSDARG00000010252, ENSDARG00000023584, ENSDARG00000043705, ENSDARG00000008186, ENSDARG00000056713, ENSDARG00000000906, ENSDARG00000022213, ENSDARG00000004378, ENSDARG00000008803, ENSDARG00000014348, ENSDARG00000070606, ENSDARG00000018516	347	661	15797	0.826466	1	1	1
GOTERM_BP_DIRECT	GO:0016310~phosphorylation	12	2.44399	0.889652	ENSDARG00000010252, ENSDARG00000023584, ENSDARG00000043705, ENSDARG00000008186, ENSDARG00000056713, ENSDARG00000000906, ENSDARG00000022213, ENSDARG00000004378, ENSDARG00000008803, ENSDARG00000014348, ENSDARG00000070606, ENSDARG00000018516	343	654	14912	0.79771	1	1	0.996899
Annotation Cluster 30	Enrichment Score: 0.06713432706042481
Category	Term	Count	%	PValue	Genes	List Total	Pop Hits	Pop Total	Fold Enrichment	Bonferroni	Benjamini	FDR
INTERPRO	IPR000152:EGF-type aspartate/asparagine hydroxylation site	3	0.610998	0.722386	ENSDARG00000020219, ENSDARG00000043130, ENSDARG00000004232	457	118	21293	1.18457	1	1	1
INTERPRO	IPR018097:EGF-like calcium-binding, conserved site	3	0.610998	0.747387	ENSDARG00000020219, ENSDARG00000043130, ENSDARG00000004232	457	124	21293	1.12725	1	1	1
INTERPRO	IPR001881:EGF-like calcium-binding	3	0.610998	0.834484	ENSDARG00000020219, ENSDARG00000043130, ENSDARG00000004232	457	150	21293	0.93186	1	1	1
SMART	SM00179:EGF_CA	3	0.610998	0.841325	ENSDARG00000020219, ENSDARG00000043130, ENSDARG00000004232	267	149	12157	0.916748	1	1	1
INTERPRO	IPR009030:Insulin-like growth factor binding protein, N-terminal	3	0.610998	0.857666	ENSDARG00000020219, ENSDARG00000043130, ENSDARG00000004232	457	159	21293	0.879113	1	1	1
UP_KEYWORDS	EGF-like domain	3	0.610998	0.870191	ENSDARG00000020219, ENSDARG00000043130, ENSDARG00000004232	481	165	22487	0.850009	1	1	0.993827
SMART	SM00181:EGF	3	0.610998	0.945718	ENSDARG00000020219, ENSDARG00000043130, ENSDARG00000004232	267	209	12157	0.653567	1	1	1
INTERPRO	IPR013032:EGF-like, conserved site	3	0.610998	0.955351	ENSDARG00000020219, ENSDARG00000043130, ENSDARG00000004232	457	225	21293	0.62124	1	1	1
INTERPRO	IPR000742:Epidermal growth factor-like domain	3	0.610998	0.973278	ENSDARG00000020219, ENSDARG00000043130, ENSDARG00000004232	457	253	21293	0.552486	1	1	1
Annotation Cluster 31	Enrichment Score: 0.06642936211989059
Category	Term	Count	%	PValue	Genes	List Total	Pop Hits	Pop Total	Fold Enrichment	Bonferroni	Benjamini	FDR
UP_KEYWORDS	Transmembrane	123	25.0509	0.797258	ENSDARG00000078659, ENSDARG00000074850, ENSDARG00000051975, ENSDARG00000071463, ENSDARG00000035890, ENSDARG00000068858, ENSDARG00000061941, ENSDARG00000057322, ENSDARG00000008388, ENSDARG00000090534, ENSDARG00000054438, ENSDARG00000056615, ENSDARG00000045561, ENSDARG00000044752, ENSDARG00000090890, ENSDARG00000006112, ENSDARG00000043148, ENSDARG00000044755, ENSDARG00000008811, ENSDARG00000079353,…	481	6068	22487	0.947646	1	1	0.993827
UP_KEYWORDS	Membrane	129	26.2729	0.822908	ENSDARG00000078659, ENSDARG00000074850, ENSDARG00000051975, ENSDARG00000071463, ENSDARG00000035890, ENSDARG00000068858, ENSDARG00000061941, ENSDARG00000057322, ENSDARG00000008388, ENSDARG00000090534, ENSDARG00000054438, ENSDARG00000056615, ENSDARG00000045561, ENSDARG00000044752, ENSDARG00000090890, ENSDARG00000006112, ENSDARG00000043148, ENSDARG00000044755, ENSDARG00000008811, ENSDARG00000079353,…	481	6398	22487	0.94261	1	1	0.993827
UP_KEYWORDS	Transmembrane helix	121	24.6436	0.844767	ENSDARG00000078659, ENSDARG00000074850, ENSDARG00000051975, ENSDARG00000071463, ENSDARG00000035890, ENSDARG00000068858, ENSDARG00000061941, ENSDARG00000057322, ENSDARG00000008388, ENSDARG00000090534, ENSDARG00000054438, ENSDARG00000056615, ENSDARG00000045561, ENSDARG00000044752, ENSDARG00000090890, ENSDARG00000006112, ENSDARG00000043148, ENSDARG00000044755, ENSDARG00000008811, ENSDARG00000079353,…	481	6055	22487	0.934238	1	1	0.993827
GOTERM_CC_DIRECT	GO:0016020~membrane	134	27.2912	0.86347	ENSDARG00000078659, ENSDARG00000074850, ENSDARG00000051975, ENSDARG00000071463, ENSDARG00000070774, ENSDARG00000035890, ENSDARG00000068858, ENSDARG00000061941, ENSDARG00000057322, ENSDARG00000008388, ENSDARG00000054438, ENSDARG00000056615, ENSDARG00000045561, ENSDARG00000004618, ENSDARG00000044752, ENSDARG00000090890, ENSDARG00000006112, ENSDARG00000043148, ENSDARG00000044755, ENSDARG00000058260,…	350	6207	15208	0.938052	1	1	0.968504
GOTERM_CC_DIRECT	GO:0016021~integral component of membrane	126	25.6619	0.972565	ENSDARG00000078659, ENSDARG00000074850, ENSDARG00000051975, ENSDARG00000071463, ENSDARG00000035890, ENSDARG00000068858, ENSDARG00000061941, ENSDARG00000057322, ENSDARG00000008388, ENSDARG00000090534, ENSDARG00000054438, ENSDARG00000056615, ENSDARG00000045561, ENSDARG00000004618, ENSDARG00000044752, ENSDARG00000090890, ENSDARG00000006112, ENSDARG00000043148, ENSDARG00000044755, ENSDARG00000058260,…	350	6180	15208	0.885903	1	1	0.972565
Annotation Cluster 32	Enrichment Score: 0.05971007063657607
Category	Term	Count	%	PValue	Genes	List Total	Pop Hits	Pop Total	Fold Enrichment	Bonferroni	Benjamini	FDR
INTERPRO	IPR000276:G protein-coupled receptor, rhodopsin-like	13	2.64766	0.835754	ENSDARG00000053124, ENSDARG00000090890, ENSDARG00000011083, ENSDARG00000055186, ENSDARG00000045957, ENSDARG00000010384, ENSDARG00000040133, ENSDARG00000057633, ENSDARG00000010317, ENSDARG00000041041, ENSDARG00000087084, ENSDARG00000058903, ENSDARG00000070669	457	710	21293	0.853111	1	1	1
GOTERM_MF_DIRECT	GO:0004930~G-protein coupled receptor activity	16	3.25866	0.851709	ENSDARG00000054438, ENSDARG00000074782, ENSDARG00000053124, ENSDARG00000090890, ENSDARG00000011083, ENSDARG00000055186, ENSDARG00000045957, ENSDARG00000002952, ENSDARG00000010384, ENSDARG00000040133, ENSDARG00000057633, ENSDARG00000010317, ENSDARG00000041041, ENSDARG00000087084, ENSDARG00000058903, ENSDARG00000070669	347	860	15797	0.846967	1	1	1
INTERPRO	IPR017452:GPCR, rhodopsin-like, 7TM	13	2.64766	0.852507	ENSDARG00000053124, ENSDARG00000090890, ENSDARG00000011083, ENSDARG00000055186, ENSDARG00000045957, ENSDARG00000010384, ENSDARG00000040133, ENSDARG00000057633, ENSDARG00000010317, ENSDARG00000041041, ENSDARG00000087084, ENSDARG00000058903, ENSDARG00000070669	457	723	21293	0.837772	1	1	1
UP_KEYWORDS	G-protein coupled receptor	10	2.03666	0.950807	ENSDARG00000040133, ENSDARG00000053124, ENSDARG00000057633, ENSDARG00000090890, ENSDARG00000010317, ENSDARG00000087084, ENSDARG00000041041, ENSDARG00000055186, ENSDARG00000058903, ENSDARG00000045957	481	670	22487	0.697769	1	1	0.993827
Annotation Cluster 33	Enrichment Score: 0.051748582963809485
Category	Term	Count	%	PValue	Genes	List Total	Pop Hits	Pop Total	Fold Enrichment	Bonferroni	Benjamini	FDR
GOTERM_BP_DIRECT	GO:0006486~protein glycosylation	3	0.610998	0.777259	ENSDARG00000058100, ENSDARG00000018971, ENSDARG00000044775	343	123	14912	1.06037	1	1	0.996899
UP_KEYWORDS	Glycosyltransferase	4	0.814664	0.842776	ENSDARG00000058100, ENSDARG00000018971, ENSDARG00000061439, ENSDARG00000044775	481	216	22487	0.86575	1	1	0.993827
GOTERM_MF_DIRECT	GO:0016757~transferase activity, transferring glycosyl groups	4	0.814664	0.88125	ENSDARG00000058100, ENSDARG00000018971, ENSDARG00000061439, ENSDARG00000044775	347	229	15797	0.795188	1	1	1
GOTERM_CC_DIRECT	GO:0000139~Golgi membrane	3	0.610998	0.922625	ENSDARG00000058100, ENSDARG00000018971, ENSDARG00000044775	350	181	15208	0.720189	1	1	0.968504
UP_KEYWORDS	Golgi apparatus	3	0.610998	0.944806	ENSDARG00000058100, ENSDARG00000018971, ENSDARG00000044775	481	214	22487	0.655381	1	1	0.993827
GOTERM_CC_DIRECT	GO:0005794~Golgi apparatus	4	0.814664	0.972218	ENSDARG00000058100, ENSDARG00000018971, ENSDARG00000044775, ENSDARG00000041505	350	304	15208	0.571729	1	1	0.972218
Annotation Cluster 34	Enrichment Score: 0.023611714342185165
Category	Term	Count	%	PValue	Genes	List Total	Pop Hits	Pop Total	Fold Enrichment	Bonferroni	Benjamini	FDR
INTERPRO	IPR001806:Small GTPase superfamily	3	0.610998	0.91052	ENSDARG00000068653, ENSDARG00000006553, ENSDARG00000045628	457	186	21293	0.7515	1	1	1
INTERPRO	IPR005225:Small GTP-binding protein domain	3	0.610998	0.95923	ENSDARG00000068653, ENSDARG00000006553, ENSDARG00000045628	457	230	21293	0.607735	1	1	1
GOTERM_BP_DIRECT	GO:0007264~small GTPase mediated signal transduction	4	0.814664	0.972641	ENSDARG00000068653, ENSDARG00000006553, ENSDARG00000045628, ENSDARG00000037924	343	305	14912	0.570167	1	1	0.996899
Annotation Cluster 35	Enrichment Score: 0.018189587104449772
Category	Term	Count	%	PValue	Genes	List Total	Pop Hits	Pop Total	Fold Enrichment	Bonferroni	Benjamini	FDR
INTERPRO	IPR012677:Nucleotide-binding, alpha-beta plait	4	0.814664	0.94368	ENSDARG00000039347, ENSDARG00000017315, ENSDARG00000059654, ENSDARG00000039082	457	283	21293	0.658558	1	1	1
SMART	SM00360:RRM	3	0.610998	0.963319	ENSDARG00000017315, ENSDARG00000059654, ENSDARG00000039082	267	230	12157	0.593894	1	1	1
INTERPRO	IPR000504:RNA recognition motif domain	3	0.610998	0.970145	ENSDARG00000017315, ENSDARG00000059654, ENSDARG00000039082	457	247	21293	0.565907	1	1	1
Annotation Cluster 36	Enrichment Score: 0.016094263491803172
Category	Term	Count	%	PValue	Genes	List Total	Pop Hits	Pop Total	Fold Enrichment	Bonferroni	Benjamini	FDR
INTERPRO	IPR017907:Zinc finger, RING-type, conserved site	4	0.814664	0.933013	ENSDARG00000086126, ENSDARG00000055436, ENSDARG00000091234, ENSDARG00000069563	457	272	21293	0.685191	1	1	1
INTERPRO	IPR001841:Zinc finger, RING-type	5	1.01833	0.975777	ENSDARG00000086126, ENSDARG00000055436, ENSDARG00000076659, ENSDARG00000091234, ENSDARG00000069563	457	406	21293	0.573805	1	1	1
SMART	SM00184:RING	4	0.814664	0.982831	ENSDARG00000086126, ENSDARG00000055436, ENSDARG00000091234, ENSDARG00000069563	267	346	12157	0.52638	1	1	1
Annotation Cluster 37	Enrichment Score: 0.0115458612615477
Category	Term	Count	%	PValue	Genes	List Total	Pop Hits	Pop Total	Fold Enrichment	Bonferroni	Benjamini	FDR
INTERPRO	IPR017441:Protein kinase, ATP binding site	9	1.83299	0.938671	ENSDARG00000010252, ENSDARG00000023584, ENSDARG00000008186, ENSDARG00000056713, ENSDARG00000004378, ENSDARG00000061095, ENSDARG00000014348, ENSDARG00000070606, ENSDARG00000018516	457	589	21293	0.711947	1	1	1
INTERPRO	IPR000719:Protein kinase, catalytic domain	10	2.03666	0.977569	ENSDARG00000010252, ENSDARG00000023584, ENSDARG00000008186, ENSDARG00000056713, ENSDARG00000011863, ENSDARG00000004378, ENSDARG00000061095, ENSDARG00000014348, ENSDARG00000070606, ENSDARG00000018516	457	735	21293	0.633918	1	1	1
GOTERM_MF_DIRECT	GO:0004672~protein kinase activity	10	2.03666	0.979819	ENSDARG00000010252, ENSDARG00000023584, ENSDARG00000008186, ENSDARG00000056713, ENSDARG00000011863, ENSDARG00000004378, ENSDARG00000061095, ENSDARG00000014348, ENSDARG00000070606, ENSDARG00000018516	347	725	15797	0.627924	1	1	1
GOTERM_BP_DIRECT	GO:0006468~protein phosphorylation	10	2.03666	0.986303	ENSDARG00000010252, ENSDARG00000023584, ENSDARG00000008186, ENSDARG00000056713, ENSDARG00000011863, ENSDARG00000004378, ENSDARG00000061095, ENSDARG00000014348, ENSDARG00000070606, ENSDARG00000018516	343	721	14912	0.602985	1	1	0.996899
INTERPRO	IPR011009:Protein kinase-like domain	10	2.03666	0.98731	ENSDARG00000010252, ENSDARG00000023584, ENSDARG00000008186, ENSDARG00000056713, ENSDARG00000011863, ENSDARG00000004378, ENSDARG00000061095, ENSDARG00000014348, ENSDARG00000070606, ENSDARG00000018516	457	781	21293	0.596581	1	1	1
Annotation Cluster 38	Enrichment Score: 0.003997785396288125
Category	Term	Count	%	PValue	Genes	List Total	Pop Hits	Pop Total	Fold Enrichment	Bonferroni	Benjamini	FDR
UP_KEYWORDS	Serine/threonine-protein kinase	4	0.814664	0.979531	ENSDARG00000023584, ENSDARG00000056713, ENSDARG00000014348, ENSDARG00000018516	481	346	22487	0.540468	1	1	0.993827
INTERPRO	IPR008271:Serine/threonine-protein kinase, active site	5	1.01833	0.99464	ENSDARG00000023584, ENSDARG00000056713, ENSDARG00000061095, ENSDARG00000014348, ENSDARG00000018516	457	500	21293	0.46593	1	1	1
GOTERM_MF_DIRECT	GO:0004674~protein serine/threonine kinase activity	4	0.814664	0.998442	ENSDARG00000023584, ENSDARG00000056713, ENSDARG00000014348, ENSDARG00000018516	347	478	15797	0.380958	1	1	1
Annotation Cluster 39	Enrichment Score: 0.0017841991327781407
Category	Term	Count	%	PValue	Genes	List Total	Pop Hits	Pop Total	Fold Enrichment	Bonferroni	Benjamini	FDR
INTERPRO	IPR007087:Zinc finger, C2H2	10	2.03666	0.99426	ENSDARG00000071463, ENSDARG00000088631, ENSDARG00000096689, ENSDARG00000042652, ENSDARG00000020884, ENSDARG00000014680, ENSDARG00000008247, ENSDARG00000074906, ENSDARG00000075891, ENSDARG00000086296	457	842	21293	0.553361	1	1	1
INTERPRO	IPR015880:Zinc finger, C2H2-like	9	1.83299	0.995875	ENSDARG00000088631, ENSDARG00000096689, ENSDARG00000042652, ENSDARG00000020884, ENSDARG00000014680, ENSDARG00000008247, ENSDARG00000074906, ENSDARG00000075891, ENSDARG00000086296	457	800	21293	0.524171	1	1	1
INTERPRO	IPR013087:Zinc finger C2H2-type/integrase DNA-binding domain	8	1.62933	0.996381	ENSDARG00000096689, ENSDARG00000042652, ENSDARG00000020884, ENSDARG00000014680, ENSDARG00000008247, ENSDARG00000074906, ENSDARG00000075891, ENSDARG00000086296	457	741	21293	0.503028	1	1	1
SMART	SM00355:ZnF_C2H2	9	1.83299	0.997086	ENSDARG00000088631, ENSDARG00000096689, ENSDARG00000042652, ENSDARG00000020884, ENSDARG00000014680, ENSDARG00000008247, ENSDARG00000074906, ENSDARG00000075891, ENSDARG00000086296	267	800	12157	0.512233	1	1	1
Annotation Cluster 40	Enrichment Score: 4.5506186548025836E-4
Category	Term	Count	%	PValue	Genes	List Total	Pop Hits	Pop Total	Fold Enrichment	Bonferroni	Benjamini	FDR
UP_KEYWORDS	Transcription regulation	6	1.222	0.997939	ENSDARG00000070463, ENSDARG00000056732, ENSDARG00000070256, ENSDARG00000079233, ENSDARG00000019810, ENSDARG00000018303	481	636	22487	0.441043	1	1	0.997939
UP_KEYWORDS	Transcription	6	1.222	0.999033	ENSDARG00000070463, ENSDARG00000056732, ENSDARG00000070256, ENSDARG00000079233, ENSDARG00000019810, ENSDARG00000018303	481	682	22487	0.411295	1	1	0.999033
GOTERM_BP_DIRECT	GO:0006351~transcription, DNA-templated	6	1.222	0.999887	ENSDARG00000070463, ENSDARG00000056732, ENSDARG00000070256, ENSDARG00000079233, ENSDARG00000019810, ENSDARG00000018303	343	747	14912	0.349199	1	1	0.999887

## Sheet: clust4_250_DAVID_IDs_High
Annotation Cluster 1	Enrichment Score: 2.364813909658065
Category	Term	Count	%	PValue	Genes	List Total	Pop Hits	Pop Total	Fold Enrichment	Bonferroni	Benjamini	FDR
GOTERM_BP_DIRECT	GO:0035567~non-canonical Wnt signaling pathway	4	1.6	0.00118707	ENSDARG00000060004, ENSDARG00000035521, ENSDARG00000089210, ENSDARG00000070050	145	22	14912	18.6984	0.37448	0.117223	0.116927
INTERPRO	IPR015526:Frizzled/secreted frizzled-related protein	4	1.6	0.0020511	ENSDARG00000060004, ENSDARG00000035521, ENSDARG00000089210, ENSDARG00000070050	228	24	21293	15.5651	0.629815	0.330911	0.327492
GOTERM_MF_DIRECT	GO:0042813~Wnt-activated receptor activity	4	1.6	0.00243844	ENSDARG00000060004, ENSDARG00000035521, ENSDARG00000089210, ENSDARG00000070050	166	26	15797	14.6404	0.439326	0.192637	0.192637
GOTERM_MF_DIRECT	GO:0017147~Wnt-protein binding	4	1.6	0.00334936	ENSDARG00000060004, ENSDARG00000035521, ENSDARG00000089210, ENSDARG00000070050	166	29	15797	13.1259	0.548477	0.198449	0.198449
SMART	SM00063:FRI	4	1.6	0.00429223	ENSDARG00000060004, ENSDARG00000035521, ENSDARG00000089210, ENSDARG00000070050	145	28	12157	11.9773	0.461739	0.30904	0.30904
INTERPRO	IPR020067:Frizzled domain	4	1.6	0.00431236	ENSDARG00000060004, ENSDARG00000035521, ENSDARG00000089210, ENSDARG00000070050	228	31	21293	12.0504	0.876522	0.332775	0.329337
UP_KEYWORDS	Wnt signaling pathway	5	2	0.017732	ENSDARG00000060004, ENSDARG00000056986, ENSDARG00000035521, ENSDARG00000089210, ENSDARG00000070050	244	92	22487	5.00869	0.883158	0.324765	0.322058
GOTERM_BP_DIRECT	GO:0060070~canonical Wnt signaling pathway	4	1.6	0.018484	ENSDARG00000060004, ENSDARG00000035521, ENSDARG00000089210, ENSDARG00000070050	145	58	14912	7.09251	0.99937	0.730118	0.72827
Annotation Cluster 2	Enrichment Score: 1.978768701578509
Category	Term	Count	%	PValue	Genes	List Total	Pop Hits	Pop Total	Fold Enrichment	Bonferroni	Benjamini	FDR
PIR_SUPERFAMILY	PIRSF002285:Op18/stathmin	3	1.2	0.00188282	ENSDARG00000033234, ENSDARG00000070537, ENSDARG00000030106	18	7	1717	40.881	0.0297035	0.0301252	0.0301252
GOTERM_BP_DIRECT	GO:0007019~microtubule depolymerization	3	1.2	0.00249602	ENSDARG00000033234, ENSDARG00000070537, ENSDARG00000030106	145	8	14912	38.5655	0.627366	0.197185	0.196686
INTERPRO	IPR000956:Stathmin family	3	1.2	0.00303707	ENSDARG00000033234, ENSDARG00000070537, ENSDARG00000030106	228	8	21293	35.0214	0.770575	0.332775	0.329337
GOTERM_BP_DIRECT	GO:0031110~regulation of microtubule polymerization or depolymerization	3	1.2	0.0057363	ENSDARG00000033234, ENSDARG00000070537, ENSDARG00000030106	145	12	14912	25.7103	0.896931	0.323691	0.322871
GOTERM_BP_DIRECT	GO:0051493~regulation of cytoskeleton organization	3	1.2	0.00780981	ENSDARG00000033234, ENSDARG00000070537, ENSDARG00000030106	145	14	14912	22.0374	0.954815	0.342764	0.341896
GOTERM_MF_DIRECT	GO:0015631~tubulin binding	3	1.2	0.0182126	ENSDARG00000033234, ENSDARG00000070537, ENSDARG00000030106	166	20	15797	14.2744	0.987173	0.863278	0.863278
GOTERM_BP_DIRECT	GO:0031175~neuron projection development	3	1.2	0.0543917	ENSDARG00000033234, ENSDARG00000070537, ENSDARG00000030106	145	39	14912	7.91088	1	1	1
GOTERM_CC_DIRECT	GO:0043005~neuron projection	3	1.2	0.233432	ENSDARG00000033234, ENSDARG00000070537, ENSDARG00000030106	169	83	15208	3.25258	1	1	1
Annotation Cluster 3	Enrichment Score: 1.930416216885152
Category	Term	Count	%	PValue	Genes	List Total	Pop Hits	Pop Total	Fold Enrichment	Bonferroni	Benjamini	FDR
INTERPRO	IPR000157:Toll/interleukin-1 receptor homology (TIR) domain	4	1.6	0.00392559	ENSDARG00000058045, ENSDARG00000016065, ENSDARG00000037758, ENSDARG00000088672	228	30	21293	12.452	0.850987	0.332775	0.329337
SMART	SM00255:TIR	4	1.6	0.00429223	ENSDARG00000058045, ENSDARG00000016065, ENSDARG00000037758, ENSDARG00000088672	145	28	12157	11.9773	0.461739	0.30904	0.30904
GOTERM_BP_DIRECT	GO:0002224~toll-like receptor signaling pathway	3	1.2	0.00481058	ENSDARG00000058045, ENSDARG00000016065, ENSDARG00000037758	145	11	14912	28.0476	0.851142	0.316697	0.315895
UP_KEYWORDS	Inflammatory response	3	1.2	0.0176198	ENSDARG00000058045, ENSDARG00000016065, ENSDARG00000037758	244	19	22487	14.5516	0.881545	0.324765	0.322058
GOTERM_BP_DIRECT	GO:0006954~inflammatory response	4	1.6	0.156003	ENSDARG00000068969, ENSDARG00000058045, ENSDARG00000016065, ENSDARG00000037758	145	141	14912	2.91749	1	1	1
Annotation Cluster 4	Enrichment Score: 1.809479306442534
Category	Term	Count	%	PValue	Genes	List Total	Pop Hits	Pop Total	Fold Enrichment	Bonferroni	Benjamini	FDR
INTERPRO	IPR001134:Netrin domain	4	1.6	0.00658784	ENSDARG00000056913, ENSDARG00000035521, ENSDARG00000089210, ENSDARG00000070050	228	36	21293	10.3767	0.9592	0.344294	0.340737
INTERPRO	IPR008993:Tissue inhibitor of metalloproteinases-like, OB-fold	4	1.6	0.0071135	ENSDARG00000056913, ENSDARG00000035521, ENSDARG00000089210, ENSDARG00000070050	228	37	21293	10.0963	0.96842	0.344294	0.340737
SMART	SM00643:C345C	3	1.2	0.0324354	ENSDARG00000056913, ENSDARG00000035521, ENSDARG00000070050	145	24	12157	10.4802	0.991332	0.518967	0.518967
INTERPRO	IPR018933:Netrin module, non-TIMP type	3	1.2	0.0380396	ENSDARG00000056913, ENSDARG00000035521, ENSDARG00000070050	228	29	21293	9.66107	1	0.681896	0.674851
Annotation Cluster 5	Enrichment Score: 1.6678723958744872
Category	Term	Count	%	PValue	Genes	List Total	Pop Hits	Pop Total	Fold Enrichment	Bonferroni	Benjamini	FDR
UP_SEQ_FEATURE	disulfide bond	6	2.4	0.00216672	ENSDARG00000013168, ENSDARG00000053479, ENSDARG00000036279, ENSDARG00000020164, ENSDARG00000062171, ENSDARG00000002336	18	157	2704	5.74098	0.171972	0.190671	0.190671
UP_SEQ_FEATURE	glycosylation site:N-linked (GlcNAc...)	7	2.8	0.0118868	ENSDARG00000013168, ENSDARG00000053479, ENSDARG00000036279, ENSDARG00000020164, ENSDARG00000062171, ENSDARG00000011506, ENSDARG00000002336	18	329	2704	3.19622	0.646668	0.523019	0.523019
UP_SEQ_FEATURE	signal peptide	6	2.4	0.0260495	ENSDARG00000013168, ENSDARG00000053479, ENSDARG00000036279, ENSDARG00000020164, ENSDARG00000062171, ENSDARG00000002336	18	283	2704	3.18492	0.899374	0.654153	0.654153
UP_KEYWORDS	Glycoprotein	7	2.8	0.317574	ENSDARG00000013168, ENSDARG00000053479, ENSDARG00000036279, ENSDARG00000020164, ENSDARG00000062171, ENSDARG00000011506, ENSDARG00000002336	244	428	22487	1.50729	1	1	1
Annotation Cluster 6	Enrichment Score: 1.4245685424969767
Category	Term	Count	%	PValue	Genes	List Total	Pop Hits	Pop Total	Fold Enrichment	Bonferroni	Benjamini	FDR
INTERPRO	IPR000243:Peptidase T1A, proteasome beta-subunit	3	1.2	0.00481286	ENSDARG00000031885, ENSDARG00000001656, ENSDARG00000000656	228	10	21293	28.0171	0.903194	0.332775	0.329337
INTERPRO	IPR023333:Proteasome B-type subunit	3	1.2	0.0108432	ENSDARG00000031885, ENSDARG00000001656, ENSDARG00000000656	228	15	21293	18.6781	0.994891	0.403702	0.399532
INTERPRO	IPR016050:Proteasome, beta-type subunit, conserved site	3	1.2	0.0138497	ENSDARG00000031885, ENSDARG00000001656, ENSDARG00000000656	228	17	21293	16.4807	0.998829	0.461858	0.457087
UP_KEYWORDS	Threonine protease	3	1.2	0.0274538	ENSDARG00000031885, ENSDARG00000001656, ENSDARG00000000656	244	24	22487	11.52	0.964582	0.366051	0.363
GOTERM_MF_DIRECT	GO:0004298~threonine-type endopeptidase activity	3	1.2	0.0299103	ENSDARG00000031885, ENSDARG00000001656, ENSDARG00000000656	166	26	15797	10.9803	0.999251	1	1
INTERPRO	IPR001353:Proteasome, subunit alpha/beta	3	1.2	0.0310888	ENSDARG00000031885, ENSDARG00000001656, ENSDARG00000000656	228	26	21293	10.7758	1	0.578731	0.572752
GOTERM_CC_DIRECT	GO:0005839~proteasome core complex	3	1.2	0.0380043	ENSDARG00000031885, ENSDARG00000001656, ENSDARG00000000656	169	28	15208	9.64159	0.949379	0.462292	0.462292
GOTERM_MF_DIRECT	GO:0004175~endopeptidase activity	3	1.2	0.0653334	ENSDARG00000031885, ENSDARG00000001656, ENSDARG00000000656	166	40	15797	7.1372	1	1	1
GOTERM_BP_DIRECT	GO:0051603~proteolysis involved in cellular protein catabolic process	3	1.2	0.104886	ENSDARG00000031885, ENSDARG00000001656, ENSDARG00000000656	145	57	14912	5.4127	1	1	1
UP_KEYWORDS	Proteasome	3	1.2	0.115599	ENSDARG00000031885, ENSDARG00000001656, ENSDARG00000000656	244	54	22487	5.11999	1	0.747118	0.740892
KEGG_PATHWAY	dre03050:Proteasome	3	1.2	0.117243	ENSDARG00000031885, ENSDARG00000001656, ENSDARG00000000656	59	55	5405	4.99692	0.999437	0.789275	0.789275
GOTERM_CC_DIRECT	GO:0000502~proteasome complex	3	1.2	0.12343	ENSDARG00000031885, ENSDARG00000001656, ENSDARG00000000656	169	55	15208	4.90845	0.999961	0.834021	0.834021
Annotation Cluster 7	Enrichment Score: 1.4035789527074924
Category	Term	Count	%	PValue	Genes	List Total	Pop Hits	Pop Total	Fold Enrichment	Bonferroni	Benjamini	FDR
INTERPRO	IPR016129:Peptidase C14, ICE, catalytic subunit p20, active site	3	1.2	0.0108432	ENSDARG00000052039, ENSDARG00000017905, ENSDARG00000014657	228	15	21293	18.6781	0.994891	0.403702	0.399532
INTERPRO	IPR002138:Peptidase C14, caspase non-catalytic subunit p10	3	1.2	0.0189483	ENSDARG00000052039, ENSDARG00000017905, ENSDARG00000014657	228	20	21293	14.0086	0.999905	0.478083	0.473144
INTERPRO	IPR015917:Peptidase C14, caspase precursor p45, core	3	1.2	0.0227188	ENSDARG00000052039, ENSDARG00000017905, ENSDARG00000014657	228	22	21293	12.735	0.999985	0.478083	0.473144
SMART	SM00115:CASc	3	1.2	0.0275666	ENSDARG00000052039, ENSDARG00000017905, ENSDARG00000014657	145	22	12157	11.4329	0.982142	0.518967	0.518967
INTERPRO	IPR001309:Peptidase C14, ICE, catalytic subunit p20	3	1.2	0.0288969	ENSDARG00000052039, ENSDARG00000017905, ENSDARG00000014657	228	25	21293	11.2068	0.999999	0.559444	0.553665
UP_KEYWORDS	Thiol protease	4	1.6	0.0798322	ENSDARG00000052039, ENSDARG00000026871, ENSDARG00000017905, ENSDARG00000014657	244	93	22487	3.96386	0.999954	0.685963	0.680246
GOTERM_MF_DIRECT	GO:0008234~cysteine-type peptidase activity	4	1.6	0.128419	ENSDARG00000052039, ENSDARG00000026871, ENSDARG00000017905, ENSDARG00000014657	166	119	15797	3.19874	1	1	1
GOTERM_MF_DIRECT	GO:0004197~cysteine-type endopeptidase activity	3	1.2	0.154956	ENSDARG00000052039, ENSDARG00000017905, ENSDARG00000014657	166	67	15797	4.26101	1	1	1
Annotation Cluster 8	Enrichment Score: 1.2171763355713703
Category	Term	Count	%	PValue	Genes	List Total	Pop Hits	Pop Total	Fold Enrichment	Bonferroni	Benjamini	FDR
INTERPRO	IPR017974:Claudin, conserved site	4	1.6	0.00823761	ENSDARG00000015964, ENSDARG00000014059, ENSDARG00000042357, ENSDARG00000044569	228	39	21293	9.5785	0.981749	0.362455	0.358711
INTERPRO	IPR006187:Claudin	4	1.6	0.0162223	ENSDARG00000015964, ENSDARG00000014059, ENSDARG00000042357, ENSDARG00000044569	228	50	21293	7.47123	0.999635	0.461858	0.457087
UP_KEYWORDS	Tight junction	4	1.6	0.021651	ENSDARG00000015964, ENSDARG00000014059, ENSDARG00000042357, ENSDARG00000044569	244	55	22487	6.70253	0.92768	0.324765	0.322058
GOTERM_CC_DIRECT	GO:0005923~bicellular tight junction	4	1.6	0.0453942	ENSDARG00000015964, ENSDARG00000014059, ENSDARG00000042357, ENSDARG00000044569	169	72	15208	4.99934	0.972046	0.462292	0.462292
INTERPRO	IPR004031:PMP-22/EMP/MP20/Claudin	4	1.6	0.073506	ENSDARG00000015964, ENSDARG00000014059, ENSDARG00000042357, ENSDARG00000044569	228	91	21293	4.10507	1	1	0.991718
GOTERM_CC_DIRECT	GO:0030054~cell junction	5	2	0.240314	ENSDARG00000015964, ENSDARG00000014059, ENSDARG00000007099, ENSDARG00000042357, ENSDARG00000044569	169	226	15208	1.99089	1	1	1
UP_KEYWORDS	Cell junction	5	2	0.241079	ENSDARG00000015964, ENSDARG00000014059, ENSDARG00000007099, ENSDARG00000042357, ENSDARG00000044569	244	230	22487	2.00347	1	1	1
KEGG_PATHWAY	dre04530:Tight junction	3	1.2	0.327293	ENSDARG00000014059, ENSDARG00000042357, ENSDARG00000044569	59	109	5405	2.52138	1	1	1
Annotation Cluster 9	Enrichment Score: 1.1345403011254724
Category	Term	Count	%	PValue	Genes	List Total	Pop Hits	Pop Total	Fold Enrichment	Bonferroni	Benjamini	FDR
GOTERM_MF_DIRECT	GO:0008233~peptidase activity	9	3.6	0.0307966	ENSDARG00000052039, ENSDARG00000067549, ENSDARG00000026871, ENSDARG00000032831, ENSDARG00000031885, ENSDARG00000017905, ENSDARG00000001656, ENSDARG00000000656, ENSDARG00000014657	166	350	15797	2.44704	0.999397	1	1
UP_KEYWORDS	Protease	8	3.2	0.0914617	ENSDARG00000052039, ENSDARG00000026871, ENSDARG00000032831, ENSDARG00000031885, ENSDARG00000017905, ENSDARG00000001656, ENSDARG00000000656, ENSDARG00000014657	244	355	22487	2.07684	0.99999	0.685963	0.680246
GOTERM_BP_DIRECT	GO:0006508~proteolysis	9	3.6	0.140164	ENSDARG00000052039, ENSDARG00000067549, ENSDARG00000026871, ENSDARG00000032831, ENSDARG00000031885, ENSDARG00000017905, ENSDARG00000001656, ENSDARG00000000656, ENSDARG00000014657	145	529	14912	1.74966	1	1	1
Annotation Cluster 10	Enrichment Score: 0.9136164113549017
Category	Term	Count	%	PValue	Genes	List Total	Pop Hits	Pop Total	Fold Enrichment	Bonferroni	Benjamini	FDR
INTERPRO	IPR018039:Intermediate filament protein, conserved site	3	1.2	0.0677604	ENSDARG00000028306, ENSDARG00000010008, ENSDARG00000088805	228	40	21293	7.00428	1	1	0.991718
UP_KEYWORDS	Intermediate filament	3	1.2	0.115599	ENSDARG00000028306, ENSDARG00000010008, ENSDARG00000088805	244	54	22487	5.11999	1	0.747118	0.740892
INTERPRO	IPR001664:Intermediate filament protein	3	1.2	0.141556	ENSDARG00000028306, ENSDARG00000010008, ENSDARG00000088805	228	62	21293	4.51889	1	1	0.991718
GOTERM_CC_DIRECT	GO:0005882~intermediate filament	3	1.2	0.149732	ENSDARG00000028306, ENSDARG00000010008, ENSDARG00000088805	169	62	15208	4.35427	0.999996	0.834021	0.834021
SMART	SM01391:SM01391	3	1.2	0.162834	ENSDARG00000028306, ENSDARG00000010008, ENSDARG00000088805	145	61	12157	4.12335	1	1	1
Annotation Cluster 11	Enrichment Score: 0.8412218842750767
Category	Term	Count	%	PValue	Genes	List Total	Pop Hits	Pop Total	Fold Enrichment	Bonferroni	Benjamini	FDR
INTERPRO	IPR003879:Butyrophylin-like	6	2.4	0.120179	ENSDARG00000069627, ENSDARG00000071024, ENSDARG00000092500, ENSDARG00000053293, ENSDARG00000076969, ENSDARG00000030954	228	244	21293	2.29648	1	1	0.991718
INTERPRO	IPR006574:SPRY-associated	6	2.4	0.120179	ENSDARG00000069627, ENSDARG00000071024, ENSDARG00000092500, ENSDARG00000053293, ENSDARG00000076969, ENSDARG00000030954	228	244	21293	2.29648	1	1	0.991718
INTERPRO	IPR003877:SPla/RYanodine receptor SPRY	6	2.4	0.133116	ENSDARG00000069627, ENSDARG00000071024, ENSDARG00000092500, ENSDARG00000053293, ENSDARG00000076969, ENSDARG00000030954	228	252	21293	2.22358	1	1	0.991718
SMART	SM00589:PRY	6	2.4	0.157981	ENSDARG00000069627, ENSDARG00000071024, ENSDARG00000092500, ENSDARG00000053293, ENSDARG00000076969, ENSDARG00000030954	145	241	12157	2.08734	1	1	1
SMART	SM00449:SPRY	6	2.4	0.163709	ENSDARG00000069627, ENSDARG00000071024, ENSDARG00000092500, ENSDARG00000053293, ENSDARG00000076969, ENSDARG00000030954	145	244	12157	2.06167	1	1	1
INTERPRO	IPR001870:B30.2/SPRY domain	6	2.4	0.180346	ENSDARG00000069627, ENSDARG00000071024, ENSDARG00000092500, ENSDARG00000053293, ENSDARG00000076969, ENSDARG00000030954	228	280	21293	2.00122	1	1	0.991718
Annotation Cluster 12	Enrichment Score: 0.8271032424933176
Category	Term	Count	%	PValue	Genes	List Total	Pop Hits	Pop Total	Fold Enrichment	Bonferroni	Benjamini	FDR
INTERPRO	IPR000198:Rho GTPase-activating protein domain	4	1.6	0.0697591	ENSDARG00000036420, ENSDARG00000060297, ENSDARG00000061784, ENSDARG00000059472	228	89	21293	4.19732	1	1	0.991718
SMART	SM00324:RhoGAP	4	1.6	0.0820083	ENSDARG00000036420, ENSDARG00000060297, ENSDARG00000061784, ENSDARG00000059472	145	86	12157	3.8996	0.999996	1	1
INTERPRO	IPR008936:Rho GTPase activation protein	4	1.6	0.134362	ENSDARG00000036420, ENSDARG00000060297, ENSDARG00000061784, ENSDARG00000059472	228	119	21293	3.13917	1	1	0.991718
GOTERM_MF_DIRECT	GO:0005096~GTPase activator activity	3	1.2	0.639517	ENSDARG00000036420, ENSDARG00000061784, ENSDARG00000059472	166	207	15797	1.37917	1	1	1
Annotation Cluster 13	Enrichment Score: 0.8032263321027918
Category	Term	Count	%	PValue	Genes	List Total	Pop Hits	Pop Total	Fold Enrichment	Bonferroni	Benjamini	FDR
GOTERM_CC_DIRECT	GO:0016020~membrane	77	30.8	0.137088	ENSDARG00000026895, ENSDARG00000054447, ENSDARG00000026017, ENSDARG00000002167, ENSDARG00000056986, ENSDARG00000071863, ENSDARG00000056105, ENSDARG00000055136, ENSDARG00000014031, ENSDARG00000077002, ENSDARG00000044569, ENSDARG00000075980, ENSDARG00000007018, ENSDARG00000006008, ENSDARG00000015964, ENSDARG00000036420, ENSDARG00000037155, ENSDARG00000058574, ENSDARG00000007099, ENSDARG00000036588,…	169	6207	15208	1.11633	0.999988	0.834021	0.834021
UP_KEYWORDS	Transmembrane helix	74	29.6	0.152123	ENSDARG00000026895, ENSDARG00000054447, ENSDARG00000026017, ENSDARG00000071863, ENSDARG00000056105, ENSDARG00000055136, ENSDARG00000014031, ENSDARG00000077002, ENSDARG00000078135, ENSDARG00000044569, ENSDARG00000075980, ENSDARG00000007018, ENSDARG00000006008, ENSDARG00000015964, ENSDARG00000037155, ENSDARG00000058574, ENSDARG00000007099, ENSDARG00000036588, ENSDARG00000009430, ENSDARG00000018159,…	244	6055	22487	1.12631	1	0.856575	0.849437
UP_KEYWORDS	Transmembrane	74	29.6	0.157039	ENSDARG00000026895, ENSDARG00000054447, ENSDARG00000026017, ENSDARG00000071863, ENSDARG00000056105, ENSDARG00000055136, ENSDARG00000014031, ENSDARG00000077002, ENSDARG00000078135, ENSDARG00000044569, ENSDARG00000075980, ENSDARG00000007018, ENSDARG00000006008, ENSDARG00000015964, ENSDARG00000037155, ENSDARG00000058574, ENSDARG00000007099, ENSDARG00000036588, ENSDARG00000009430, ENSDARG00000018159,…	244	6068	22487	1.1239	1	0.856575	0.849437
GOTERM_CC_DIRECT	GO:0016021~integral component of membrane	76	30.4	0.162472	ENSDARG00000026895, ENSDARG00000054447, ENSDARG00000026017, ENSDARG00000071863, ENSDARG00000056105, ENSDARG00000055136, ENSDARG00000014031, ENSDARG00000077002, ENSDARG00000044569, ENSDARG00000075980, ENSDARG00000007018, ENSDARG00000070050, ENSDARG00000006008, ENSDARG00000015964, ENSDARG00000037155, ENSDARG00000058574, ENSDARG00000007099, ENSDARG00000036588, ENSDARG00000009430, ENSDARG00000018159,…	169	6180	15208	1.10665	0.999999	0.834021	0.834021
UP_KEYWORDS	Membrane	77	30.8	0.181088	ENSDARG00000026895, ENSDARG00000054447, ENSDARG00000026017, ENSDARG00000056986, ENSDARG00000071863, ENSDARG00000056105, ENSDARG00000055136, ENSDARG00000014031, ENSDARG00000077002, ENSDARG00000078135, ENSDARG00000044569, ENSDARG00000075980, ENSDARG00000007018, ENSDARG00000006008, ENSDARG00000015964, ENSDARG00000037155, ENSDARG00000058574, ENSDARG00000007099, ENSDARG00000036588, ENSDARG00000009430,…	244	6398	22487	1.10914	1	0.944807	0.936933
Annotation Cluster 14	Enrichment Score: 0.7466778916612736
Category	Term	Count	%	PValue	Genes	List Total	Pop Hits	Pop Total	Fold Enrichment	Bonferroni	Benjamini	FDR
UP_KEYWORDS	Leucine-rich repeat	5	2	0.118294	ENSDARG00000058045, ENSDARG00000074815, ENSDARG00000016065, ENSDARG00000009702, ENSDARG00000037758	244	173	22487	2.66358	1	0.747118	0.740892
INTERPRO	IPR003591:Leucine-rich repeat, typical subtype	5	2	0.195843	ENSDARG00000058045, ENSDARG00000074815, ENSDARG00000016065, ENSDARG00000009702, ENSDARG00000037758	228	214	21293	2.18202	1	1	0.991718
SMART	SM00369:LRR_TYP	5	2	0.248369	ENSDARG00000058045, ENSDARG00000074815, ENSDARG00000016065, ENSDARG00000009702, ENSDARG00000037758	145	214	12157	1.95891	1	1	1
Annotation Cluster 15	Enrichment Score: 0.7371749214761802
Category	Term	Count	%	PValue	Genes	List Total	Pop Hits	Pop Total	Fold Enrichment	Bonferroni	Benjamini	FDR
UP_SEQ_FEATURE	topological domain:Cytoplasmic	5	2	0.0956108	ENSDARG00000013168, ENSDARG00000007099, ENSDARG00000020164, ENSDARG00000011506, ENSDARG00000002336	18	285	2704	2.63548	0.99984	0.846909	0.846909
UP_SEQ_FEATURE	topological domain:Extracellular	4	1.6	0.121729	ENSDARG00000013168, ENSDARG00000007099, ENSDARG00000020164, ENSDARG00000002336	18	197	2704	3.0502	0.999988	0.97383	0.97383
UP_SEQ_FEATURE	transmembrane region	5	2	0.527928	ENSDARG00000013168, ENSDARG00000007099, ENSDARG00000020164, ENSDARG00000011506, ENSDARG00000002336	18	591	2704	1.27092	1	1	1
Annotation Cluster 16	Enrichment Score: 0.6153852070775772
Category	Term	Count	%	PValue	Genes	List Total	Pop Hits	Pop Total	Fold Enrichment	Bonferroni	Benjamini	FDR
INTERPRO	IPR011598:Myc-type, basic helix-loop-helix (bHLH) domain	4	1.6	0.209946	ENSDARG00000005915, ENSDARG00000074897, ENSDARG00000068168, ENSDARG00000041381	228	148	21293	2.52406	1	1	0.991718
SMART	SM00353:HLH	4	1.6	0.245654	ENSDARG00000005915, ENSDARG00000074897, ENSDARG00000068168, ENSDARG00000041381	145	145	12157	2.31287	1	1	1
GOTERM_MF_DIRECT	GO:0046983~protein dimerization activity	4	1.6	0.27632	ENSDARG00000005915, ENSDARG00000074897, ENSDARG00000068168, ENSDARG00000041381	166	175	15797	2.17515	1	1	1
Annotation Cluster 17	Enrichment Score: 0.5958836015707378
Category	Term	Count	%	PValue	Genes	List Total	Pop Hits	Pop Total	Fold Enrichment	Bonferroni	Benjamini	FDR
GOTERM_BP_DIRECT	GO:0035023~regulation of Rho protein signal transduction	3	1.2	0.233623	ENSDARG00000036420, ENSDARG00000073684, ENSDARG00000037554	145	95	14912	3.24762	1	1	1
GOTERM_MF_DIRECT	GO:0005089~Rho guanyl-nucleotide exchange factor activity	3	1.2	0.245873	ENSDARG00000036420, ENSDARG00000073684, ENSDARG00000037554	166	91	15797	3.13723	1	1	1
INTERPRO	IPR000219:Dbl homology (DH) domain	3	1.2	0.253159	ENSDARG00000036420, ENSDARG00000073684, ENSDARG00000037554	228	91	21293	3.0788	1	1	0.991718
SMART	SM00325:RhoGEF	3	1.2	0.284344	ENSDARG00000036420, ENSDARG00000073684, ENSDARG00000037554	145	89	12157	2.82611	1	1	1
Annotation Cluster 18	Enrichment Score: 0.5775549136669574
Category	Term	Count	%	PValue	Genes	List Total	Pop Hits	Pop Total	Fold Enrichment	Bonferroni	Benjamini	FDR
INTERPRO	IPR013106:Immunoglobulin V-set	8	3.2	0.0881318	ENSDARG00000091712, ENSDARG00000079402, ENSDARG00000089769, ENSDARG00000062222, ENSDARG00000074815, ENSDARG00000079553, ENSDARG00000077002, ENSDARG00000058538	228	356	21293	2.09866	1	1	0.991718
INTERPRO	IPR003599:Immunoglobulin subtype	9	3.6	0.320587	ENSDARG00000091712, ENSDARG00000079402, ENSDARG00000089769, ENSDARG00000062222, ENSDARG00000074815, ENSDARG00000079553, ENSDARG00000077002, ENSDARG00000058538, ENSDARG00000088672	228	607	21293	1.3847	1	1	0.991718
INTERPRO	IPR007110:Immunoglobulin-like domain	11	4.4	0.40257	ENSDARG00000091712, ENSDARG00000036588, ENSDARG00000079402, ENSDARG00000089769, ENSDARG00000062222, ENSDARG00000094316, ENSDARG00000074815, ENSDARG00000079553, ENSDARG00000077002, ENSDARG00000058538, ENSDARG00000088672	228	841	21293	1.22151	1	1	0.991718
SMART	SM00409:IG	9	3.6	0.430389	ENSDARG00000091712, ENSDARG00000079402, ENSDARG00000089769, ENSDARG00000062222, ENSDARG00000074815, ENSDARG00000079553, ENSDARG00000077002, ENSDARG00000058538, ENSDARG00000088672	145	607	12157	1.24312	1	1	1
Annotation Cluster 19	Enrichment Score: 0.504359198928961
Category	Term	Count	%	PValue	Genes	List Total	Pop Hits	Pop Total	Fold Enrichment	Bonferroni	Benjamini	FDR
INTERPRO	IPR001849:Pleckstrin homology domain	6	2.4	0.283813	ENSDARG00000073684, ENSDARG00000037554, ENSDARG00000090526, ENSDARG00000075327, ENSDARG00000061784, ENSDARG00000074806	228	331	21293	1.69288	1	1	0.991718
SMART	SM00233:PH	6	2.4	0.322433	ENSDARG00000073684, ENSDARG00000037554, ENSDARG00000090526, ENSDARG00000075327, ENSDARG00000061784, ENSDARG00000074806	145	317	12157	1.5869	1	1	1
INTERPRO	IPR011993:Pleckstrin homology-like domain	8	3.2	0.335313	ENSDARG00000036420, ENSDARG00000073684, ENSDARG00000037554, ENSDARG00000090526, ENSDARG00000075327, ENSDARG00000074599, ENSDARG00000061784, ENSDARG00000074806	228	527	21293	1.41769	1	1	0.991718
Annotation Cluster 20	Enrichment Score: 0.47165935367736905
Category	Term	Count	%	PValue	Genes	List Total	Pop Hits	Pop Total	Fold Enrichment	Bonferroni	Benjamini	FDR
UP_KEYWORDS	SH3 domain	4	1.6	0.299026	ENSDARG00000032482, ENSDARG00000002167, ENSDARG00000088835, ENSDARG00000007783	244	177	22487	2.08271	1	1	1
INTERPRO	IPR001452:Src homology-3 domain	5	2	0.354534	ENSDARG00000032482, ENSDARG00000002167, ENSDARG00000088835, ENSDARG00000007783, ENSDARG00000013777	228	281	21293	1.66175	1	1	0.991718
SMART	SM00326:SH3	5	2	0.36279	ENSDARG00000032482, ENSDARG00000002167, ENSDARG00000088835, ENSDARG00000007783, ENSDARG00000013777	145	257	12157	1.63116	1	1	1
Annotation Cluster 21	Enrichment Score: 0.4024537558727336
Category	Term	Count	%	PValue	Genes	List Total	Pop Hits	Pop Total	Fold Enrichment	Bonferroni	Benjamini	FDR
INTERPRO	IPR000315:Zinc finger, B-box	4	1.6	0.289445	ENSDARG00000095864, ENSDARG00000053293, ENSDARG00000076969, ENSDARG00000030954	228	176	21293	2.12251	1	1	0.991718
INTERPRO	IPR017907:Zinc finger, RING-type, conserved site	5	2	0.33261	ENSDARG00000075504, ENSDARG00000095864, ENSDARG00000053293, ENSDARG00000076969, ENSDARG00000030954	228	272	21293	1.71673	1	1	0.991718
INTERPRO	IPR001841:Zinc finger, RING-type	6	2.4	0.432518	ENSDARG00000075504, ENSDARG00000095864, ENSDARG00000076638, ENSDARG00000053293, ENSDARG00000076969, ENSDARG00000030954	228	406	21293	1.38015	1	1	0.991718
SMART	SM00184:RING	5	2	0.589766	ENSDARG00000075504, ENSDARG00000095864, ENSDARG00000053293, ENSDARG00000076969, ENSDARG00000030954	145	346	12157	1.21158	1	1	1
Annotation Cluster 22	Enrichment Score: 0.2417757814297981
Category	Term	Count	%	PValue	Genes	List Total	Pop Hits	Pop Total	Fold Enrichment	Bonferroni	Benjamini	FDR
UP_KEYWORDS	Immunoglobulin domain	3	1.2	0.429612	ENSDARG00000074815, ENSDARG00000079553, ENSDARG00000058538	244	135	22487	2.048	1	1	1
INTERPRO	IPR003598:Immunoglobulin subtype 2	4	1.6	0.627315	ENSDARG00000074815, ENSDARG00000079553, ENSDARG00000077002, ENSDARG00000058538	228	302	21293	1.23696	1	1	0.991718
SMART	SM00408:IGc2	4	1.6	0.698411	ENSDARG00000074815, ENSDARG00000079553, ENSDARG00000077002, ENSDARG00000058538	145	302	12157	1.11048	1	1	1
Annotation Cluster 23	Enrichment Score: 0.14841110139902325
Category	Term	Count	%	PValue	Genes	List Total	Pop Hits	Pop Total	Fold Enrichment	Bonferroni	Benjamini	FDR
INTERPRO	IPR000276:G protein-coupled receptor, rhodopsin-like	8	3.2	0.635956	ENSDARG00000037155, ENSDARG00000077414, ENSDARG00000041173, ENSDARG00000041959, ENSDARG00000089840, ENSDARG00000042370, ENSDARG00000059507, ENSDARG00000011876	228	710	21293	1.05229	1	1	0.991718
INTERPRO	IPR017452:GPCR, rhodopsin-like, 7TM	8	3.2	0.654705	ENSDARG00000037155, ENSDARG00000077414, ENSDARG00000041173, ENSDARG00000041959, ENSDARG00000089840, ENSDARG00000042370, ENSDARG00000059507, ENSDARG00000011876	228	723	21293	1.03336	1	1	0.991718
GOTERM_BP_DIRECT	GO:0007186~G-protein coupled receptor signaling pathway	7	2.8	0.861577	ENSDARG00000037155, ENSDARG00000077414, ENSDARG00000041173, ENSDARG00000041959, ENSDARG00000042370, ENSDARG00000059507, ENSDARG00000011876	145	883	14912	0.815277	1	1	1
Annotation Cluster 24	Enrichment Score: 0.05329073687112487
Category	Term	Count	%	PValue	Genes	List Total	Pop Hits	Pop Total	Fold Enrichment	Bonferroni	Benjamini	FDR
UP_KEYWORDS	Serine/threonine-protein kinase	4	1.6	0.724904	ENSDARG00000055136, ENSDARG00000070228, ENSDARG00000060716, ENSDARG00000045836	244	346	22487	1.06543	1	1	1
GOTERM_BP_DIRECT	GO:0016310~phosphorylation	6	2.4	0.7625	ENSDARG00000007783, ENSDARG00000055136, ENSDARG00000070228, ENSDARG00000060716, ENSDARG00000004049, ENSDARG00000045836	145	654	14912	0.943499	1	1	1
GOTERM_MF_DIRECT	GO:0016301~kinase activity	6	2.4	0.825381	ENSDARG00000007783, ENSDARG00000055136, ENSDARG00000070228, ENSDARG00000060716, ENSDARG00000004049, ENSDARG00000045836	166	661	15797	0.863806	1	1	1
UP_KEYWORDS	Kinase	6	2.4	0.861032	ENSDARG00000007783, ENSDARG00000055136, ENSDARG00000070228, ENSDARG00000060716, ENSDARG00000004049, ENSDARG00000045836	244	679	22487	0.814373	1	1	1
INTERPRO	IPR017441:Protein kinase, ATP binding site	5	2	0.8769	ENSDARG00000007783, ENSDARG00000055136, ENSDARG00000070228, ENSDARG00000060716, ENSDARG00000045836	228	589	21293	0.792787	1	1	0.991718
GOTERM_MF_DIRECT	GO:0004674~protein serine/threonine kinase activity	4	1.6	0.879898	ENSDARG00000055136, ENSDARG00000070228, ENSDARG00000060716, ENSDARG00000045836	166	478	15797	0.79634	1	1	1
GOTERM_BP_DIRECT	GO:0006468~protein phosphorylation	5	2	0.922376	ENSDARG00000007783, ENSDARG00000055136, ENSDARG00000070228, ENSDARG00000060716, ENSDARG00000045836	145	721	14912	0.713186	1	1	1
GOTERM_MF_DIRECT	GO:0004672~protein kinase activity	5	2	0.948378	ENSDARG00000007783, ENSDARG00000055136, ENSDARG00000070228, ENSDARG00000060716, ENSDARG00000045836	166	725	15797	0.656294	1	1	1
INTERPRO	IPR000719:Protein kinase, catalytic domain	5	2	0.956098	ENSDARG00000007783, ENSDARG00000055136, ENSDARG00000070228, ENSDARG00000060716, ENSDARG00000045836	228	735	21293	0.635309	1	1	0.991718
SMART	SM00220:S_TKc	4	1.6	0.961428	ENSDARG00000055136, ENSDARG00000070228, ENSDARG00000060716, ENSDARG00000045836	145	550	12157	0.609755	1	1	1
INTERPRO	IPR011009:Protein kinase-like domain	5	2	0.968952	ENSDARG00000007783, ENSDARG00000055136, ENSDARG00000070228, ENSDARG00000060716, ENSDARG00000045836	228	781	21293	0.59789	1	1	0.991718
INTERPRO	IPR008271:Serine/threonine-protein kinase, active site	3	1.2	0.971232	ENSDARG00000055136, ENSDARG00000070228, ENSDARG00000060716	228	500	21293	0.560342	1	1	0.991718
Annotation Cluster 25	Enrichment Score: 0.04472462029401384
Category	Term	Count	%	PValue	Genes	List Total	Pop Hits	Pop Total	Fold Enrichment	Bonferroni	Benjamini	FDR
GOTERM_BP_DIRECT	GO:0006351~transcription, DNA-templated	6	2.4	0.853684	ENSDARG00000014259, ENSDARG00000010591, ENSDARG00000041381, ENSDARG00000070428, ENSDARG00000091419, ENSDARG00000013777	145	747	14912	0.826035	1	1	1
UP_KEYWORDS	Transcription regulation	5	2	0.915592	ENSDARG00000014259, ENSDARG00000010591, ENSDARG00000041381, ENSDARG00000070428, ENSDARG00000091419	244	636	22487	0.724527	1	1	1
UP_KEYWORDS	Transcription	5	2	0.93935	ENSDARG00000014259, ENSDARG00000010591, ENSDARG00000041381, ENSDARG00000070428, ENSDARG00000091419	244	682	22487	0.675659	1	1	1
Annotation Cluster 26	Enrichment Score: 0.008257609634437304
Category	Term	Count	%	PValue	Genes	List Total	Pop Hits	Pop Total	Fold Enrichment	Bonferroni	Benjamini	FDR
UP_KEYWORDS	G-protein coupled receptor	4	1.6	0.977259	ENSDARG00000041173, ENSDARG00000041959, ENSDARG00000042370, ENSDARG00000011876	244	670	22487	0.550208	1	1	1
GOTERM_MF_DIRECT	GO:0004871~signal transducer activity	4	1.6	0.981297	ENSDARG00000041173, ENSDARG00000041959, ENSDARG00000042370, ENSDARG00000011876	166	713	15797	0.533872	1	1	1
UP_KEYWORDS	Transducer	4	1.6	0.984956	ENSDARG00000041173, ENSDARG00000041959, ENSDARG00000042370, ENSDARG00000011876	244	718	22487	0.513425	1	1	1
Annotation Cluster 27	Enrichment Score: 7.30635727144882E-4
Category	Term	Count	%	PValue	Genes	List Total	Pop Hits	Pop Total	Fold Enrichment	Bonferroni	Benjamini	FDR
INTERPRO	IPR013087:Zinc finger C2H2-type/integrase DNA-binding domain	3	1.2	0.997139	ENSDARG00000013539, ENSDARG00000076171, ENSDARG00000069342	228	741	21293	0.378099	1	1	0.997139
INTERPRO	IPR015880:Zinc finger, C2H2-like	3	1.2	0.998406	ENSDARG00000013539, ENSDARG00000076171, ENSDARG00000069342	228	800	21293	0.350214	1	1	0.998406
SMART	SM00355:ZnF_C2H2	3	1.2	0.999413	ENSDARG00000013539, ENSDARG00000076171, ENSDARG00000069342	145	800	12157	0.314405	1	1	1

## Sheet: clust5_154_DAVID_IDs_High
Annotation Cluster 1	Enrichment Score: 8.292581189719046
Category	Term	Count	%	PValue	Genes	List Total	Pop Hits	Pop Total	Fold Enrichment	Bonferroni	Benjamini	FDR
INTERPRO	IPR008160:Collagen triple helix repeat	11	7.14286	7.87922e-10	ENSDARG00000035809, ENSDARG00000003533, ENSDARG00000074908, ENSDARG00000009014, ENSDARG00000012405, ENSDARG00000021720, ENSDARG00000052063, ENSDARG00000078322, ENSDARG00000055175, ENSDARG00000020007, ENSDARG00000087198	143	95	21293	17.2413	2.5765e-07	2.5765e-07	2.54499e-07
UP_KEYWORDS	Collagen	9	5.84416	1.29647e-08	ENSDARG00000035809, ENSDARG00000003533, ENSDARG00000009014, ENSDARG00000012405, ENSDARG00000052063, ENSDARG00000078322, ENSDARG00000055175, ENSDARG00000020007, ENSDARG00000087198	148	67	22487	20.4097	1.06311e-06	5.31554e-07	5.25072e-07
GOTERM_CC_DIRECT	GO:0005581~collagen trimer	9	5.84416	1.29721e-08	ENSDARG00000035809, ENSDARG00000003533, ENSDARG00000009014, ENSDARG00000012405, ENSDARG00000052063, ENSDARG00000078322, ENSDARG00000055175, ENSDARG00000020007, ENSDARG00000087198	100	68	15208	20.1282	5.31855e-07	5.31855e-07	5.31855e-07
Annotation Cluster 2	Enrichment Score: 1.9678334354347613
Category	Term	Count	%	PValue	Genes	List Total	Pop Hits	Pop Total	Fold Enrichment	Bonferroni	Benjamini	FDR
INTERPRO	IPR018487:Hemopexin-like repeats	4	2.5974	0.000841827	ENSDARG00000051962, ENSDARG00000002235, ENSDARG00000026325, ENSDARG00000010482	143	28	21293	21.2717	0.240727	0.0550555	0.054382
INTERPRO	IPR000585:Hemopexin-like domain	4	2.5974	0.000841827	ENSDARG00000051962, ENSDARG00000002235, ENSDARG00000026325, ENSDARG00000010482	143	28	21293	21.2717	0.240727	0.0550555	0.054382
SMART	SM00120:HX	4	2.5974	0.00161302	ENSDARG00000051962, ENSDARG00000002235, ENSDARG00000026325, ENSDARG00000010482	103	28	12157	16.8613	0.172111	0.0943619	0.0943619
INTERPRO	IPR018486:Hemopexin, conserved site	3	1.94805	0.00278973	ENSDARG00000051962, ENSDARG00000002235, ENSDARG00000026325	143	12	21293	37.2255	0.598889	0.13032	0.128726
PIR_SUPERFAMILY	PIRSF001191:matrix metalloproteinase, stromelysin type	3	1.94805	0.00398941	ENSDARG00000051962, ENSDARG00000002235, ENSDARG00000026325	10	19	1717	27.1105	0.035337	0.0359047	0.0359047
INTERPRO	IPR016293:Peptidase M10A, metazoans	3	1.94805	0.0070105	ENSDARG00000051962, ENSDARG00000002235, ENSDARG00000026325	143	19	21293	23.5109	0.899792	0.286554	0.283049
GOTERM_MF_DIRECT	GO:0008237~metallopeptidase activity	5	3.24675	0.009422	ENSDARG00000051962, ENSDARG00000002235, ENSDARG00000026325, ENSDARG00000067545, ENSDARG00000069583	102	129	15797	6.00281	0.716081	0.626563	0.626563
INTERPRO	IPR021190:Peptidase M10A	3	1.94805	0.0110718	ENSDARG00000051962, ENSDARG00000002235, ENSDARG00000026325	143	24	21293	18.6128	0.973765	0.362046	0.357618
INTERPRO	IPR001818:Peptidase M10, metallopeptidase	3	1.94805	0.0110718	ENSDARG00000051962, ENSDARG00000002235, ENSDARG00000026325	143	24	21293	18.6128	0.973765	0.362046	0.357618
INTERPRO	IPR024079:Metallopeptidase, catalytic domain	4	2.5974	0.0175305	ENSDARG00000051962, ENSDARG00000002235, ENSDARG00000026325, ENSDARG00000067545	143	82	21293	7.26352	0.996921	0.479405	0.473541
INTERPRO	IPR006026:Peptidase, metallopeptidase	3	1.94805	0.0291976	ENSDARG00000051962, ENSDARG00000002235, ENSDARG00000026325	143	40	21293	11.1677	0.999938	0.636507	0.628721
GOTERM_MF_DIRECT	GO:0004222~metalloendopeptidase activity	4	2.5974	0.0358345	ENSDARG00000051962, ENSDARG00000002235, ENSDARG00000026325, ENSDARG00000067545	102	113	15797	5.48221	0.992199	1	1
SMART	SM00235:ZnMc	3	1.94805	0.0442294	ENSDARG00000051962, ENSDARG00000002235, ENSDARG00000026325	103	40	12157	8.85218	0.994972	1	1
UP_KEYWORDS	Metalloprotease	3	1.94805	0.0712543	ENSDARG00000051962, ENSDARG00000002235, ENSDARG00000026325	148	67	22487	6.80325	0.997669	0.730356	0.72145
UP_KEYWORDS	Calcium	4	2.5974	0.510096	ENSDARG00000051962, ENSDARG00000002235, ENSDARG00000026325, ENSDARG00000016936	148	414	22487	1.46801	1	1	1
Annotation Cluster 3	Enrichment Score: 1.5244533902743278
Category	Term	Count	%	PValue	Genes	List Total	Pop Hits	Pop Total	Fold Enrichment	Bonferroni	Benjamini	FDR
UP_KEYWORDS	Laminin EGF-like domain	3	1.94805	0.0115386	ENSDARG00000020785, ENSDARG00000045524, ENSDARG00000093572	148	25	22487	18.2327	0.613903	0.157694	0.155771
INTERPRO	IPR002049:EGF-like, laminin	3	1.94805	0.0423514	ENSDARG00000020785, ENSDARG00000045524, ENSDARG00000093572	143	49	21293	9.11645	0.999999	0.72889	0.719974
SMART	SM00180:EGF_Lam	3	1.94805	0.0546535	ENSDARG00000020785, ENSDARG00000045524, ENSDARG00000093572	103	45	12157	7.86861	0.998606	1	1
Annotation Cluster 4	Enrichment Score: 1.2510273175658855
Category	Term	Count	%	PValue	Genes	List Total	Pop Hits	Pop Total	Fold Enrichment	Bonferroni	Benjamini	FDR
INTERPRO	IPR007110:Immunoglobulin-like domain	12	7.79221	0.0253575	ENSDARG00000015887, ENSDARG00000090844, ENSDARG00000006901, ENSDARG00000010154, ENSDARG00000075697, ENSDARG00000095295, ENSDARG00000051875, ENSDARG00000053136, ENSDARG00000091269, ENSDARG00000070668, ENSDARG00000035018, ENSDARG00000016936	143	841	21293	2.12464	0.999775	0.592278	0.585033
INTERPRO	IPR003599:Immunoglobulin subtype	9	5.84416	0.0508225	ENSDARG00000090844, ENSDARG00000006901, ENSDARG00000010154, ENSDARG00000075697, ENSDARG00000095295, ENSDARG00000051875, ENSDARG00000091269, ENSDARG00000070668, ENSDARG00000016936	143	607	21293	2.20777	1	0.755407	0.746166
SMART	SM00409:IG	9	5.84416	0.137011	ENSDARG00000090844, ENSDARG00000006901, ENSDARG00000010154, ENSDARG00000075697, ENSDARG00000095295, ENSDARG00000051875, ENSDARG00000091269, ENSDARG00000070668, ENSDARG00000016936	103	607	12157	1.75002	1	1	1
Annotation Cluster 5	Enrichment Score: 0.815985502850235
Category	Term	Count	%	PValue	Genes	List Total	Pop Hits	Pop Total	Fold Enrichment	Bonferroni	Benjamini	FDR
GOTERM_MF_DIRECT	GO:0008233~peptidase activity	6	3.8961	0.0738066	ENSDARG00000051962, ENSDARG00000002235, ENSDARG00000026325, ENSDARG00000034211, ENSDARG00000061989, ENSDARG00000095005	102	350	15797	2.65496	0.999963	1	1
UP_KEYWORDS	Protease	6	3.8961	0.0839404	ENSDARG00000051962, ENSDARG00000002235, ENSDARG00000026325, ENSDARG00000034211, ENSDARG00000061989, ENSDARG00000095005	148	355	22487	2.56799	0.999245	0.764791	0.755464
UP_KEYWORDS	Hydrolase	7	4.54545	0.575409	ENSDARG00000051962, ENSDARG00000002235, ENSDARG00000026325, ENSDARG00000034211, ENSDARG00000061989, ENSDARG00000095005, ENSDARG00000056065	148	934	22487	1.13873	1	1	1
Annotation Cluster 6	Enrichment Score: 0.5195028236815422
Category	Term	Count	%	PValue	Genes	List Total	Pop Hits	Pop Total	Fold Enrichment	Bonferroni	Benjamini	FDR
UP_KEYWORDS	Transcription regulation	7	4.54545	0.23751	ENSDARG00000091756, ENSDARG00000044010, ENSDARG00000008278, ENSDARG00000009822, ENSDARG00000059707, ENSDARG00000042835, ENSDARG00000016526	148	636	22487	1.67229	1	1	1
UP_KEYWORDS	Transcription	7	4.54545	0.288197	ENSDARG00000091756, ENSDARG00000044010, ENSDARG00000008278, ENSDARG00000009822, ENSDARG00000059707, ENSDARG00000042835, ENSDARG00000016526	148	682	22487	1.55949	1	1	1
GOTERM_BP_DIRECT	GO:0006351~transcription, DNA-templated	7	4.54545	0.403757	ENSDARG00000091756, ENSDARG00000044010, ENSDARG00000008278, ENSDARG00000009822, ENSDARG00000059707, ENSDARG00000042835, ENSDARG00000016526	103	747	14912	1.35668	1	1	1
Annotation Cluster 7	Enrichment Score: 0.2730866525554237
Category	Term	Count	%	PValue	Genes	List Total	Pop Hits	Pop Total	Fold Enrichment	Bonferroni	Benjamini	FDR
INTERPRO	IPR013087:Zinc finger C2H2-type/integrase DNA-binding domain	7	4.54545	0.37354	ENSDARG00000002445, ENSDARG00000091756, ENSDARG00000040046, ENSDARG00000015495, ENSDARG00000078018, ENSDARG00000016022, ENSDARG00000059707	143	741	21293	1.40663	1	1	0.990798
INTERPRO	IPR015880:Zinc finger, C2H2-like	7	4.54545	0.443904	ENSDARG00000002445, ENSDARG00000091756, ENSDARG00000040046, ENSDARG00000015495, ENSDARG00000078018, ENSDARG00000016022, ENSDARG00000059707	143	800	21293	1.30289	1	1	0.990798
INTERPRO	IPR007087:Zinc finger, C2H2	7	4.54545	0.493148	ENSDARG00000002445, ENSDARG00000091756, ENSDARG00000040046, ENSDARG00000015495, ENSDARG00000078018, ENSDARG00000016022, ENSDARG00000059707	143	842	21293	1.2379	1	1	0.990798
SMART	SM00355:ZnF_C2H2	7	4.54545	0.670091	ENSDARG00000002445, ENSDARG00000091756, ENSDARG00000040046, ENSDARG00000015495, ENSDARG00000078018, ENSDARG00000016022, ENSDARG00000059707	103	800	12157	1.03275	1	1	1
GOTERM_MF_DIRECT	GO:0003676~nucleic acid binding	8	5.19481	0.786739	ENSDARG00000002445, ENSDARG00000091756, ENSDARG00000040046, ENSDARG00000015495, ENSDARG00000078018, ENSDARG00000016022, ENSDARG00000043757, ENSDARG00000059707	102	1375	15797	0.901077	1	1	1
Annotation Cluster 8	Enrichment Score: 0.26862841674367416
Category	Term	Count	%	PValue	Genes	List Total	Pop Hits	Pop Total	Fold Enrichment	Bonferroni	Benjamini	FDR
INTERPRO	IPR003879:Butyrophylin-like	3	1.94805	0.485629	ENSDARG00000093975, ENSDARG00000090946, ENSDARG00000026704	143	244	21293	1.83076	1	1	0.990798
INTERPRO	IPR006574:SPRY-associated	3	1.94805	0.485629	ENSDARG00000093975, ENSDARG00000090946, ENSDARG00000026704	143	244	21293	1.83076	1	1	0.990798
INTERPRO	IPR003877:SPla/RYanodine receptor SPRY	3	1.94805	0.502664	ENSDARG00000093975, ENSDARG00000090946, ENSDARG00000026704	143	252	21293	1.77264	1	1	0.990798
INTERPRO	IPR001870:B30.2/SPRY domain	3	1.94805	0.559368	ENSDARG00000093975, ENSDARG00000090946, ENSDARG00000026704	143	280	21293	1.59538	1	1	0.990798
SMART	SM00589:PRY	3	1.94805	0.603809	ENSDARG00000093975, ENSDARG00000090946, ENSDARG00000026704	103	241	12157	1.46924	1	1	1
SMART	SM00449:SPRY	3	1.94805	0.610584	ENSDARG00000093975, ENSDARG00000090946, ENSDARG00000026704	103	244	12157	1.45118	1	1	1
Annotation Cluster 9	Enrichment Score: 0.110209244726167
Category	Term	Count	%	PValue	Genes	List Total	Pop Hits	Pop Total	Fold Enrichment	Bonferroni	Benjamini	FDR
UP_KEYWORDS	Transmembrane helix	38	24.6753	0.714032	ENSDARG00000095295, ENSDARG00000051875, ENSDARG00000044561, ENSDARG00000056722, ENSDARG00000074754, ENSDARG00000087508, ENSDARG00000078970, ENSDARG00000056740, ENSDARG00000054583, ENSDARG00000010154, ENSDARG00000078193, ENSDARG00000091269, ENSDARG00000059202, ENSDARG00000067545, ENSDARG00000070668, ENSDARG00000075817, ENSDARG00000051962, ENSDARG00000075697, ENSDARG00000002235, ENSDARG00000006859,…	148	6055	22487	0.953541	1	1	1
UP_KEYWORDS	Transmembrane	38	24.6753	0.719361	ENSDARG00000095295, ENSDARG00000051875, ENSDARG00000044561, ENSDARG00000056722, ENSDARG00000074754, ENSDARG00000087508, ENSDARG00000078970, ENSDARG00000056740, ENSDARG00000054583, ENSDARG00000010154, ENSDARG00000078193, ENSDARG00000091269, ENSDARG00000059202, ENSDARG00000067545, ENSDARG00000070668, ENSDARG00000075817, ENSDARG00000051962, ENSDARG00000075697, ENSDARG00000002235, ENSDARG00000006859,…	148	6068	22487	0.951498	1	1	1
GOTERM_CC_DIRECT	GO:0016021~integral component of membrane	38	24.6753	0.777233	ENSDARG00000095295, ENSDARG00000051875, ENSDARG00000044561, ENSDARG00000056722, ENSDARG00000074754, ENSDARG00000087508, ENSDARG00000078970, ENSDARG00000056740, ENSDARG00000054583, ENSDARG00000010154, ENSDARG00000078193, ENSDARG00000091269, ENSDARG00000059202, ENSDARG00000067545, ENSDARG00000070668, ENSDARG00000075817, ENSDARG00000051962, ENSDARG00000075697, ENSDARG00000002235, ENSDARG00000006859,…	100	6180	15208	0.93512	1	1	1
UP_KEYWORDS	Membrane	38	24.6753	0.835491	ENSDARG00000095295, ENSDARG00000051875, ENSDARG00000044561, ENSDARG00000056722, ENSDARG00000074754, ENSDARG00000087508, ENSDARG00000078970, ENSDARG00000056740, ENSDARG00000054583, ENSDARG00000010154, ENSDARG00000078193, ENSDARG00000091269, ENSDARG00000059202, ENSDARG00000067545, ENSDARG00000070668, ENSDARG00000075817, ENSDARG00000051962, ENSDARG00000075697, ENSDARG00000002235, ENSDARG00000006859,…	148	6398	22487	0.902421	1	1	1
GOTERM_CC_DIRECT	GO:0016020~membrane	37	24.026	0.842938	ENSDARG00000095295, ENSDARG00000051875, ENSDARG00000044561, ENSDARG00000056722, ENSDARG00000074754, ENSDARG00000087508, ENSDARG00000078970, ENSDARG00000056740, ENSDARG00000054583, ENSDARG00000010154, ENSDARG00000078193, ENSDARG00000059202, ENSDARG00000067545, ENSDARG00000070668, ENSDARG00000019207, ENSDARG00000075817, ENSDARG00000051962, ENSDARG00000075697, ENSDARG00000002235, ENSDARG00000044010,…	100	6207	15208	0.906551	1	1	1
Annotation Cluster 10	Enrichment Score: 0.08868912492304469
Category	Term	Count	%	PValue	Genes	List Total	Pop Hits	Pop Total	Fold Enrichment	Bonferroni	Benjamini	FDR
KEGG_PATHWAY	dre04080:Neuroactive ligand-receptor interaction	3	1.94805	0.73907	ENSDARG00000002172, ENSDARG00000045788, ENSDARG00000062811	35	408	5405	1.1355	1	1	1
GOTERM_MF_DIRECT	GO:0004930~G-protein coupled receptor activity	5	3.24675	0.806909	ENSDARG00000054137, ENSDARG00000044561, ENSDARG00000002172, ENSDARG00000045788, ENSDARG00000062811	102	860	15797	0.900422	1	1	1
INTERPRO	IPR000276:G protein-coupled receptor, rhodopsin-like	4	2.5974	0.85659	ENSDARG00000044561, ENSDARG00000002172, ENSDARG00000045788, ENSDARG00000062811	143	710	21293	0.838885	1	1	0.990798
INTERPRO	IPR017452:GPCR, rhodopsin-like, 7TM	4	2.5974	0.86489	ENSDARG00000044561, ENSDARG00000002172, ENSDARG00000045788, ENSDARG00000062811	143	723	21293	0.823801	1	1	0.990798
Annotation Cluster 11	Enrichment Score: 0.08140590848311442
Category	Term	Count	%	PValue	Genes	List Total	Pop Hits	Pop Total	Fold Enrichment	Bonferroni	Benjamini	FDR
GOTERM_MF_DIRECT	GO:0004930~G-protein coupled receptor activity	5	3.24675	0.806909	ENSDARG00000054137, ENSDARG00000044561, ENSDARG00000002172, ENSDARG00000045788, ENSDARG00000062811	102	860	15797	0.900422	1	1	1
UP_KEYWORDS	G-protein coupled receptor	4	2.5974	0.817685	ENSDARG00000054137, ENSDARG00000044561, ENSDARG00000002172, ENSDARG00000045788	148	670	22487	0.9071	1	1	1
GOTERM_MF_DIRECT	GO:0004871~signal transducer activity	4	2.5974	0.840167	ENSDARG00000054137, ENSDARG00000044561, ENSDARG00000002172, ENSDARG00000045788	102	713	15797	0.86885	1	1	1
UP_KEYWORDS	Transducer	4	2.5974	0.852315	ENSDARG00000054137, ENSDARG00000044561, ENSDARG00000002172, ENSDARG00000045788	148	718	22487	0.846458	1	1	1
Annotation Cluster 12	Enrichment Score: 0.05327517338949678
Category	Term	Count	%	PValue	Genes	List Total	Pop Hits	Pop Total	Fold Enrichment	Bonferroni	Benjamini	FDR
GOTERM_MF_DIRECT	GO:0016301~kinase activity	4	2.5974	0.800295	ENSDARG00000060597, ENSDARG00000052396, ENSDARG00000010878, ENSDARG00000094894	102	661	15797	0.937202	1	1	1
UP_KEYWORDS	Kinase	4	2.5974	0.824657	ENSDARG00000060597, ENSDARG00000052396, ENSDARG00000010878, ENSDARG00000094894	148	679	22487	0.895076	1	1	1
GOTERM_BP_DIRECT	GO:0016310~phosphorylation	4	2.5974	0.83065	ENSDARG00000060597, ENSDARG00000052396, ENSDARG00000010878, ENSDARG00000094894	103	654	14912	0.885484	1	1	1
GOTERM_MF_DIRECT	GO:0016740~transferase activity	4	2.5974	0.992328	ENSDARG00000060597, ENSDARG00000052396, ENSDARG00000010878, ENSDARG00000094894	102	1319	15797	0.469667	1	1	1
UP_KEYWORDS	Transferase	4	2.5974	0.995467	ENSDARG00000060597, ENSDARG00000052396, ENSDARG00000010878, ENSDARG00000094894	148	1398	22487	0.434733	1	1	1
Annotation Cluster 13	Enrichment Score: 0.039605362178426105
Category	Term	Count	%	PValue	Genes	List Total	Pop Hits	Pop Total	Fold Enrichment	Bonferroni	Benjamini	FDR
UP_KEYWORDS	ATP-binding	6	3.8961	0.863411	ENSDARG00000015016, ENSDARG00000093975, ENSDARG00000052396, ENSDARG00000079500, ENSDARG00000090946, ENSDARG00000056065	148	1123	22487	0.811786	1	1	1
UP_KEYWORDS	Nucleotide-binding	7	4.54545	0.906048	ENSDARG00000015016, ENSDARG00000093975, ENSDARG00000021688, ENSDARG00000052396, ENSDARG00000079500, ENSDARG00000090946, ENSDARG00000056065	148	1413	22487	0.752707	1	1	1
GOTERM_MF_DIRECT	GO:0000166~nucleotide binding	8	5.19481	0.922038	ENSDARG00000015016, ENSDARG00000093975, ENSDARG00000021688, ENSDARG00000052396, ENSDARG00000079500, ENSDARG00000090946, ENSDARG00000056065, ENSDARG00000043757	102	1678	15797	0.738367	1	1	1
GOTERM_MF_DIRECT	GO:0005524~ATP binding	7	4.54545	0.962634	ENSDARG00000015016, ENSDARG00000028676, ENSDARG00000093975, ENSDARG00000052396, ENSDARG00000079500, ENSDARG00000090946, ENSDARG00000056065	102	1668	15797	0.649945	1	1	1

## Sheet: clust6_74_DAVID_IDs_High
Annotation Cluster 1	Enrichment Score: 1.5156034722709149
Category	Term	Count	%	PValue	Genes	List Total	Pop Hits	Pop Total	Fold Enrichment	Bonferroni	Benjamini	FDR
UP_KEYWORDS	Transmembrane helix	29	39.1892	0.0118122	ENSDARG00000077228, ENSDARG00000079307, ENSDARG00000001891, ENSDARG00000022971, ENSDARG00000078331, ENSDARG00000052000, ENSDARG00000092222, ENSDARG00000060926, ENSDARG00000002249, ENSDARG00000020901, ENSDARG00000009870, ENSDARG00000059348, ENSDARG00000042880, ENSDARG00000075914, ENSDARG00000041150, ENSDARG00000088023, ENSDARG00000076824, ENSDARG00000021398, ENSDARG00000059090, ENSDARG00000045006,…	71	6055	22487	1.5169	0.627025	0.504967	0.504967
UP_KEYWORDS	Transmembrane	29	39.1892	0.0121679	ENSDARG00000077228, ENSDARG00000079307, ENSDARG00000001891, ENSDARG00000022971, ENSDARG00000078331, ENSDARG00000052000, ENSDARG00000092222, ENSDARG00000060926, ENSDARG00000002249, ENSDARG00000020901, ENSDARG00000009870, ENSDARG00000059348, ENSDARG00000042880, ENSDARG00000075914, ENSDARG00000041150, ENSDARG00000088023, ENSDARG00000076824, ENSDARG00000021398, ENSDARG00000059090, ENSDARG00000045006,…	71	6068	22487	1.51365	0.638007	0.504967	0.504967
UP_KEYWORDS	Membrane	29	39.1892	0.0246479	ENSDARG00000077228, ENSDARG00000079307, ENSDARG00000001891, ENSDARG00000022971, ENSDARG00000078331, ENSDARG00000052000, ENSDARG00000092222, ENSDARG00000060926, ENSDARG00000002249, ENSDARG00000020901, ENSDARG00000009870, ENSDARG00000059348, ENSDARG00000042880, ENSDARG00000075914, ENSDARG00000041150, ENSDARG00000088023, ENSDARG00000076824, ENSDARG00000021398, ENSDARG00000059090, ENSDARG00000045006,…	71	6398	22487	1.43558	0.873992	0.681926	0.681926
GOTERM_CC_DIRECT	GO:0016021~integral component of membrane	28	37.8378	0.0654596	ENSDARG00000077228, ENSDARG00000079307, ENSDARG00000001891, ENSDARG00000022971, ENSDARG00000078331, ENSDARG00000052000, ENSDARG00000092222, ENSDARG00000060926, ENSDARG00000002249, ENSDARG00000020901, ENSDARG00000009870, ENSDARG00000059348, ENSDARG00000042880, ENSDARG00000075914, ENSDARG00000041150, ENSDARG00000088023, ENSDARG00000076824, ENSDARG00000021398, ENSDARG00000045006, ENSDARG00000039220,…	53	6180	15208	1.30007	0.952476	1	1
GOTERM_CC_DIRECT	GO:0016020~membrane	27	36.4865	0.113942	ENSDARG00000077228, ENSDARG00000079307, ENSDARG00000001891, ENSDARG00000022971, ENSDARG00000078331, ENSDARG00000052000, ENSDARG00000060926, ENSDARG00000002249, ENSDARG00000020901, ENSDARG00000009870, ENSDARG00000059348, ENSDARG00000042880, ENSDARG00000075914, ENSDARG00000041150, ENSDARG00000088023, ENSDARG00000021398, ENSDARG00000045006, ENSDARG00000039220, ENSDARG00000054890, ENSDARG00000052594,…	53	6207	15208	1.24818	0.995677	1	1
Annotation Cluster 2	Enrichment Score: 0.9335539768959904
Category	Term	Count	%	PValue	Genes	List Total	Pop Hits	Pop Total	Fold Enrichment	Bonferroni	Benjamini	FDR
INTERPRO	IPR000719:Protein kinase, catalytic domain	6	8.10811	0.085515	ENSDARG00000077228, ENSDARG00000060264, ENSDARG00000062469, ENSDARG00000022971, ENSDARG00000009870, ENSDARG00000052923	69	735	21293	2.51914	1	1	1
INTERPRO	IPR011009:Protein kinase-like domain	6	8.10811	0.103937	ENSDARG00000077228, ENSDARG00000060264, ENSDARG00000062469, ENSDARG00000022971, ENSDARG00000009870, ENSDARG00000052923	69	781	21293	2.37076	1	1	1
GOTERM_MF_DIRECT	GO:0004672~protein kinase activity	6	8.10811	0.14027	ENSDARG00000077228, ENSDARG00000060264, ENSDARG00000062469, ENSDARG00000022971, ENSDARG00000009870, ENSDARG00000052923	61	725	15797	2.14318	1	1	1
GOTERM_BP_DIRECT	GO:0006468~protein phosphorylation	6	8.10811	0.147914	ENSDARG00000077228, ENSDARG00000060264, ENSDARG00000062469, ENSDARG00000022971, ENSDARG00000009870, ENSDARG00000052923	59	721	14912	2.10329	1	1	1
Annotation Cluster 3	Enrichment Score: 0.6779949200897364
Category	Term	Count	%	PValue	Genes	List Total	Pop Hits	Pop Total	Fold Enrichment	Bonferroni	Benjamini	FDR
INTERPRO	IPR018247:EF-Hand 1, calcium-binding site	3	4.05405	0.159339	ENSDARG00000007869, ENSDARG00000075209, ENSDARG00000039272	69	223	21293	4.15149	1	1	1
INTERPRO	IPR002048:EF-hand domain	3	4.05405	0.212154	ENSDARG00000007869, ENSDARG00000075209, ENSDARG00000039272	69	269	21293	3.44157	1	1	1
INTERPRO	IPR011992:EF-hand-like domain	3	4.05405	0.273553	ENSDARG00000007869, ENSDARG00000075209, ENSDARG00000039272	69	321	21293	2.88406	1	1	1
Annotation Cluster 4	Enrichment Score: 0.29327910765312143
Category	Term	Count	%	PValue	Genes	List Total	Pop Hits	Pop Total	Fold Enrichment	Bonferroni	Benjamini	FDR
UP_KEYWORDS	Kinase	4	5.40541	0.354547	ENSDARG00000077228, ENSDARG00000044295, ENSDARG00000022971, ENSDARG00000009870	71	679	22487	1.86579	1	1	1
GOTERM_MF_DIRECT	GO:0016301~kinase activity	4	5.40541	0.461925	ENSDARG00000077228, ENSDARG00000044295, ENSDARG00000022971, ENSDARG00000009870	61	661	15797	1.56712	1	1	1
GOTERM_BP_DIRECT	GO:0016310~phosphorylation	4	5.40541	0.470701	ENSDARG00000077228, ENSDARG00000044295, ENSDARG00000022971, ENSDARG00000009870	59	654	14912	1.54585	1	1	1
UP_KEYWORDS	ATP-binding	3	4.05405	0.870751	ENSDARG00000077228, ENSDARG00000022971, ENSDARG00000009870	71	1123	22487	0.846086	1	1	1
Annotation Cluster 5	Enrichment Score: 0.25080583648532534
Category	Term	Count	%	PValue	Genes	List Total	Pop Hits	Pop Total	Fold Enrichment	Bonferroni	Benjamini	FDR
INTERPRO	IPR007110:Immunoglobulin-like domain	4	5.40541	0.50654	ENSDARG00000077228, ENSDARG00000042545, ENSDARG00000042880, ENSDARG00000040250	69	841	21293	1.46775	1	1	1
INTERPRO	IPR003599:Immunoglobulin subtype	3	4.05405	0.581285	ENSDARG00000077228, ENSDARG00000042545, ENSDARG00000042880	69	607	21293	1.52518	1	1	1
SMART	SM00409:IG	3	4.05405	0.600593	ENSDARG00000077228, ENSDARG00000042545, ENSDARG00000042880	41	607	12157	1.46546	1	1	1

## Sheet: clust7_37_DAVID_IDs_High
Annotation Cluster 1	Enrichment Score: 0.421311827739764
Category	Term	Count	%	PValue	Genes	List Total	Pop Hits	Pop Total	Fold Enrichment	Bonferroni	Benjamini	FDR
GOTERM_CC_DIRECT	GO:0016020~membrane	12	32.4324	0.194918	ENSDARG00000063215, ENSDARG00000087446, ENSDARG00000025555, ENSDARG00000031095, ENSDARG00000057410, ENSDARG00000079369, ENSDARG00000056102, ENSDARG00000039374, ENSDARG00000031731, ENSDARG00000010784, ENSDARG00000089004, ENSDARG00000029381	22	6207	15208	1.33644	0.994503	1	1
GOTERM_CC_DIRECT	GO:0016021~integral component of membrane	11	29.7297	0.330084	ENSDARG00000063215, ENSDARG00000087446, ENSDARG00000025555, ENSDARG00000057410, ENSDARG00000079369, ENSDARG00000056102, ENSDARG00000039374, ENSDARG00000031731, ENSDARG00000010784, ENSDARG00000089004, ENSDARG00000029381	22	6180	15208	1.23042	0.999933	1	1
UP_KEYWORDS	Membrane	12	32.4324	0.451668	ENSDARG00000063215, ENSDARG00000087446, ENSDARG00000025555, ENSDARG00000031095, ENSDARG00000057410, ENSDARG00000079369, ENSDARG00000056102, ENSDARG00000039374, ENSDARG00000031731, ENSDARG00000010784, ENSDARG00000089004, ENSDARG00000029381	37	6398	22487	1.1399	1	1	1
UP_KEYWORDS	Transmembrane helix	11	29.7297	0.51732	ENSDARG00000063215, ENSDARG00000087446, ENSDARG00000025555, ENSDARG00000057410, ENSDARG00000079369, ENSDARG00000056102, ENSDARG00000039374, ENSDARG00000031731, ENSDARG00000010784, ENSDARG00000089004, ENSDARG00000029381	37	6055	22487	1.1041	1	1	1
UP_KEYWORDS	Transmembrane	11	29.7297	0.520457	ENSDARG00000063215, ENSDARG00000087446, ENSDARG00000025555, ENSDARG00000057410, ENSDARG00000079369, ENSDARG00000056102, ENSDARG00000039374, ENSDARG00000031731, ENSDARG00000010784, ENSDARG00000089004, ENSDARG00000029381	37	6068	22487	1.10173	1	1	1

## Sheet: clust8_53_DAVID_IDs_High
Annotation Cluster 1	Enrichment Score: 3.51414032232736
Category	Term	Count	%	PValue	Genes	List Total	Pop Hits	Pop Total	Fold Enrichment	Bonferroni	Benjamini	FDR
GOTERM_BP_DIRECT	GO:0019882~antigen processing and presentation	5	9.43396	6.61501e-06	ENSDARG00000079105, ENSDARG00000092731, ENSDARG00000075963, ENSDARG00000036628, ENSDARG00000031745	29	66	14912	38.9551	0.000436497	0.000436591	0.000436591
INTERPRO	IPR011162:MHC classes I/II-like antigen recognition protein	4	7.54717	0.000690025	ENSDARG00000079105, ENSDARG00000092731, ENSDARG00000075963, ENSDARG00000031745	47	80	21293	22.6521	0.0921144	0.0322012	0.0317412
INTERPRO	IPR003597:Immunoglobulin C1-set	4	7.54717	0.00128011	ENSDARG00000079105, ENSDARG00000092731, ENSDARG00000075963, ENSDARG00000031745	47	99	21293	18.3047	0.16417	0.0448039	0.0441639
SMART	SM00407:IGc1	4	7.54717	0.00150243	ENSDARG00000079105, ENSDARG00000092731, ENSDARG00000075963, ENSDARG00000031745	30	96	12157	16.8847	0.0724218	0.0751217	0.0751217
Annotation Cluster 2	Enrichment Score: 1.9476736368680712
Category	Term	Count	%	PValue	Genes	List Total	Pop Hits	Pop Total	Fold Enrichment	Bonferroni	Benjamini	FDR
KEGG_PATHWAY	dre04672:Intestinal immune network for IgA production	3	5.66038	0.00281605	ENSDARG00000079105, ENSDARG00000079333, ENSDARG00000031745	12	40	5405	33.7812	0.0601551	0.0309765	0.0295685
GOTERM_BP_DIRECT	GO:0006955~immune response	4	7.54717	0.0171104	ENSDARG00000079105, ENSDARG00000079333, ENSDARG00000036628, ENSDARG00000031745	29	293	14912	7.01989	0.67988	0.376428	0.376428
KEGG_PATHWAY	dre04514:Cell adhesion molecules (CAMs)	3	5.66038	0.0297906	ENSDARG00000079105, ENSDARG00000079333, ENSDARG00000031745	12	136	5405	9.93566	0.485909	0.206112	0.196743
Annotation Cluster 3	Enrichment Score: 1.1044887237933427
Category	Term	Count	%	PValue	Genes	List Total	Pop Hits	Pop Total	Fold Enrichment	Bonferroni	Benjamini	FDR
INTERPRO	IPR001881:EGF-like calcium-binding	3	5.66038	0.0416933	ENSDARG00000068710, ENSDARG00000009401, ENSDARG00000015947	47	150	21293	9.06085	0.997426	0.650819	0.641521
SMART	SM00179:EGF_CA	3	5.66038	0.0488242	ENSDARG00000068710, ENSDARG00000009401, ENSDARG00000015947	30	149	12157	8.15906	0.918146	0.853823	0.853823
UP_KEYWORDS	EGF-like domain	3	5.66038	0.0502731	ENSDARG00000068710, ENSDARG00000009401, ENSDARG00000015947	50	165	22487	8.17709	0.927966	0.854643	0.854643
INTERPRO	IPR013032:EGF-like, conserved site	3	5.66038	0.085018	ENSDARG00000068710, ENSDARG00000009401, ENSDARG00000015947	47	225	21293	6.04057	0.999996	0.793501	0.782166
SMART	SM00181:EGF	3	5.66038	0.0882441	ENSDARG00000068710, ENSDARG00000009401, ENSDARG00000015947	30	209	12157	5.81675	0.990139	1	1
INTERPRO	IPR000742:Epidermal growth factor-like domain	3	5.66038	0.103613	ENSDARG00000068710, ENSDARG00000009401, ENSDARG00000015947	47	253	21293	5.37205	1	0.843279	0.831232
GOTERM_MF_DIRECT	GO:0005509~calcium ion binding	4	7.54717	0.233308	ENSDARG00000058486, ENSDARG00000068710, ENSDARG00000009401, ENSDARG00000015947	38	714	15797	2.32891	0.999999	1	1
Annotation Cluster 4	Enrichment Score: 0.556341220090255
Category	Term	Count	%	PValue	Genes	List Total	Pop Hits	Pop Total	Fold Enrichment	Bonferroni	Benjamini	FDR
GOTERM_CC_DIRECT	GO:0016021~integral component of membrane	17	32.0755	0.144208	ENSDARG00000079105, ENSDARG00000075963, ENSDARG00000071543, ENSDARG00000079333, ENSDARG00000079244, ENSDARG00000092653, ENSDARG00000062519, ENSDARG00000007358, ENSDARG00000039243, ENSDARG00000078389, ENSDARG00000068638, ENSDARG00000036787, ENSDARG00000017489, ENSDARG00000092731, ENSDARG00000069981, ENSDARG00000036628, ENSDARG00000031745	32	6180	15208	1.30732	0.967484	0.793145	0.793145
GOTERM_CC_DIRECT	GO:0016020~membrane	16	30.1887	0.247922	ENSDARG00000079105, ENSDARG00000075963, ENSDARG00000071543, ENSDARG00000079333, ENSDARG00000079244, ENSDARG00000092653, ENSDARG00000062519, ENSDARG00000007358, ENSDARG00000039243, ENSDARG00000068638, ENSDARG00000036787, ENSDARG00000017489, ENSDARG00000092731, ENSDARG00000069981, ENSDARG00000036628, ENSDARG00000031745	32	6207	15208	1.22507	0.998104	1	1
UP_KEYWORDS	Transmembrane helix	16	30.1887	0.329649	ENSDARG00000079105, ENSDARG00000075963, ENSDARG00000071543, ENSDARG00000079333, ENSDARG00000079244, ENSDARG00000092653, ENSDARG00000062519, ENSDARG00000007358, ENSDARG00000068638, ENSDARG00000036787, ENSDARG00000017489, ENSDARG00000092731, ENSDARG00000075802, ENSDARG00000069981, ENSDARG00000036628, ENSDARG00000031745	50	6055	22487	1.18841	1	1	1
UP_KEYWORDS	Transmembrane	16	30.1887	0.333014	ENSDARG00000079105, ENSDARG00000075963, ENSDARG00000071543, ENSDARG00000079333, ENSDARG00000079244, ENSDARG00000092653, ENSDARG00000062519, ENSDARG00000007358, ENSDARG00000068638, ENSDARG00000036787, ENSDARG00000017489, ENSDARG00000092731, ENSDARG00000075802, ENSDARG00000069981, ENSDARG00000036628, ENSDARG00000031745	50	6068	22487	1.18587	1	1	1
UP_KEYWORDS	Membrane	16	30.1887	0.421186	ENSDARG00000079105, ENSDARG00000075963, ENSDARG00000071543, ENSDARG00000079333, ENSDARG00000079244, ENSDARG00000092653, ENSDARG00000062519, ENSDARG00000007358, ENSDARG00000068638, ENSDARG00000036787, ENSDARG00000017489, ENSDARG00000092731, ENSDARG00000075802, ENSDARG00000069981, ENSDARG00000036628, ENSDARG00000031745	50	6398	22487	1.1247	1	1	1
Annotation Cluster 5	Enrichment Score: 0.28924089004243925
Category	Term	Count	%	PValue	Genes	List Total	Pop Hits	Pop Total	Fold Enrichment	Bonferroni	Benjamini	FDR
UP_KEYWORDS	Transcription regulation	3	5.66038	0.405328	ENSDARG00000056666, ENSDARG00000076182, ENSDARG00000069552	50	636	22487	2.12142	1	1	1
GOTERM_BP_DIRECT	GO:0006351~transcription, DNA-templated	3	5.66038	0.412744	ENSDARG00000056666, ENSDARG00000076182, ENSDARG00000069552	29	747	14912	2.06509	1	1	1
UP_KEYWORDS	Transcription	3	5.66038	0.440196	ENSDARG00000056666, ENSDARG00000076182, ENSDARG00000069552	50	682	22487	1.97833	1	1	1
GOTERM_BP_DIRECT	GO:0006355~regulation of transcription, DNA-templated	4	7.54717	0.451346	ENSDARG00000045661, ENSDARG00000056666, ENSDARG00000076182, ENSDARG00000069552	29	1310	14912	1.5701	1	1	1
UP_KEYWORDS	DNA-binding	3	5.66038	0.615461	ENSDARG00000056666, ENSDARG00000076182, ENSDARG00000069552	50	944	22487	1.42926	1	1	1
UP_KEYWORDS	Nucleus	3	5.66038	0.898898	ENSDARG00000056666, ENSDARG00000076182, ENSDARG00000069552	50	1726	22487	0.781703	1	1	1
Annotation Cluster 6	Enrichment Score: 0.13071046771182457
Category	Term	Count	%	PValue	Genes	List Total	Pop Hits	Pop Total	Fold Enrichment	Bonferroni	Benjamini	FDR
UP_KEYWORDS	Nucleotide-binding	4	7.54717	0.602167	ENSDARG00000036787, ENSDARG00000062519, ENSDARG00000014427, ENSDARG00000089463	50	1413	22487	1.27315	1	1	1
UP_KEYWORDS	ATP-binding	3	5.66038	0.709819	ENSDARG00000036787, ENSDARG00000062519, ENSDARG00000089463	50	1123	22487	1.20144	1	1	1
GOTERM_MF_DIRECT	GO:0000166~nucleotide binding	4	7.54717	0.768128	ENSDARG00000036787, ENSDARG00000062519, ENSDARG00000014427, ENSDARG00000089463	38	1678	15797	0.990967	1	1	1
GOTERM_MF_DIRECT	GO:0005524~ATP binding	3	5.66038	0.913818	ENSDARG00000036787, ENSDARG00000062519, ENSDARG00000089463	38	1668	15797	0.747681	1	1	1

[truncated: 6 more sheets: clust9_3_DAVID_IDs_High, clust10_8DAVID_IDs_High, clust11_6_DAVID_IDs_High, clust12_1_DAVID_IDs_High, clust13_3_DAVID_IDs_High, FDRgenomeSignif]
