# Supplementary figures and images for: Incomplete Recovery of Zebrafish Retina Following Cryoinjury
Source: MDPI journal article supplement (doi:10.3390/cells11081373), 2022-04-18

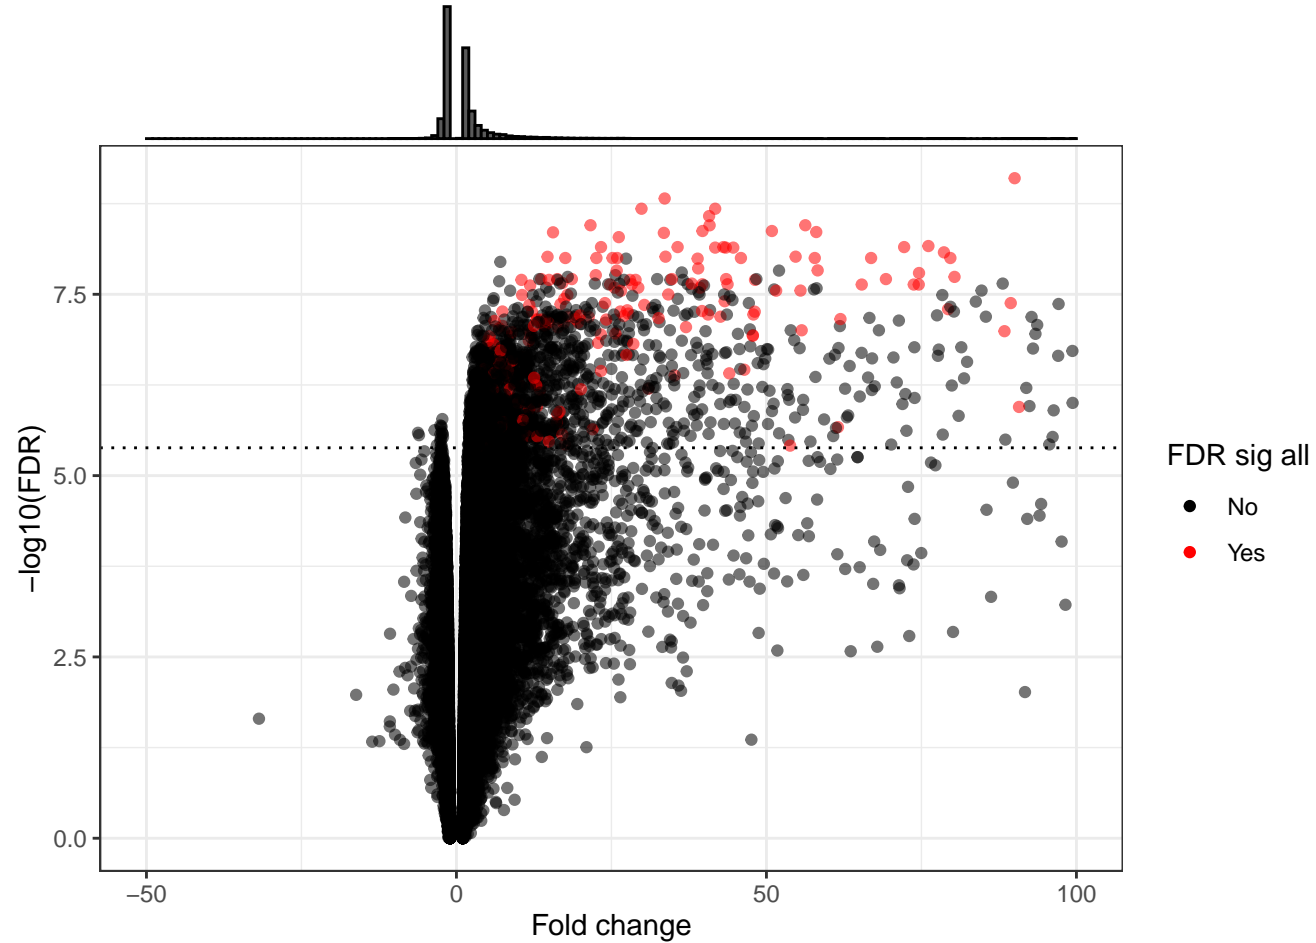

Supplement: s1 [file s1]

Figure S1 RNA-seq subset analysis gene clustering.

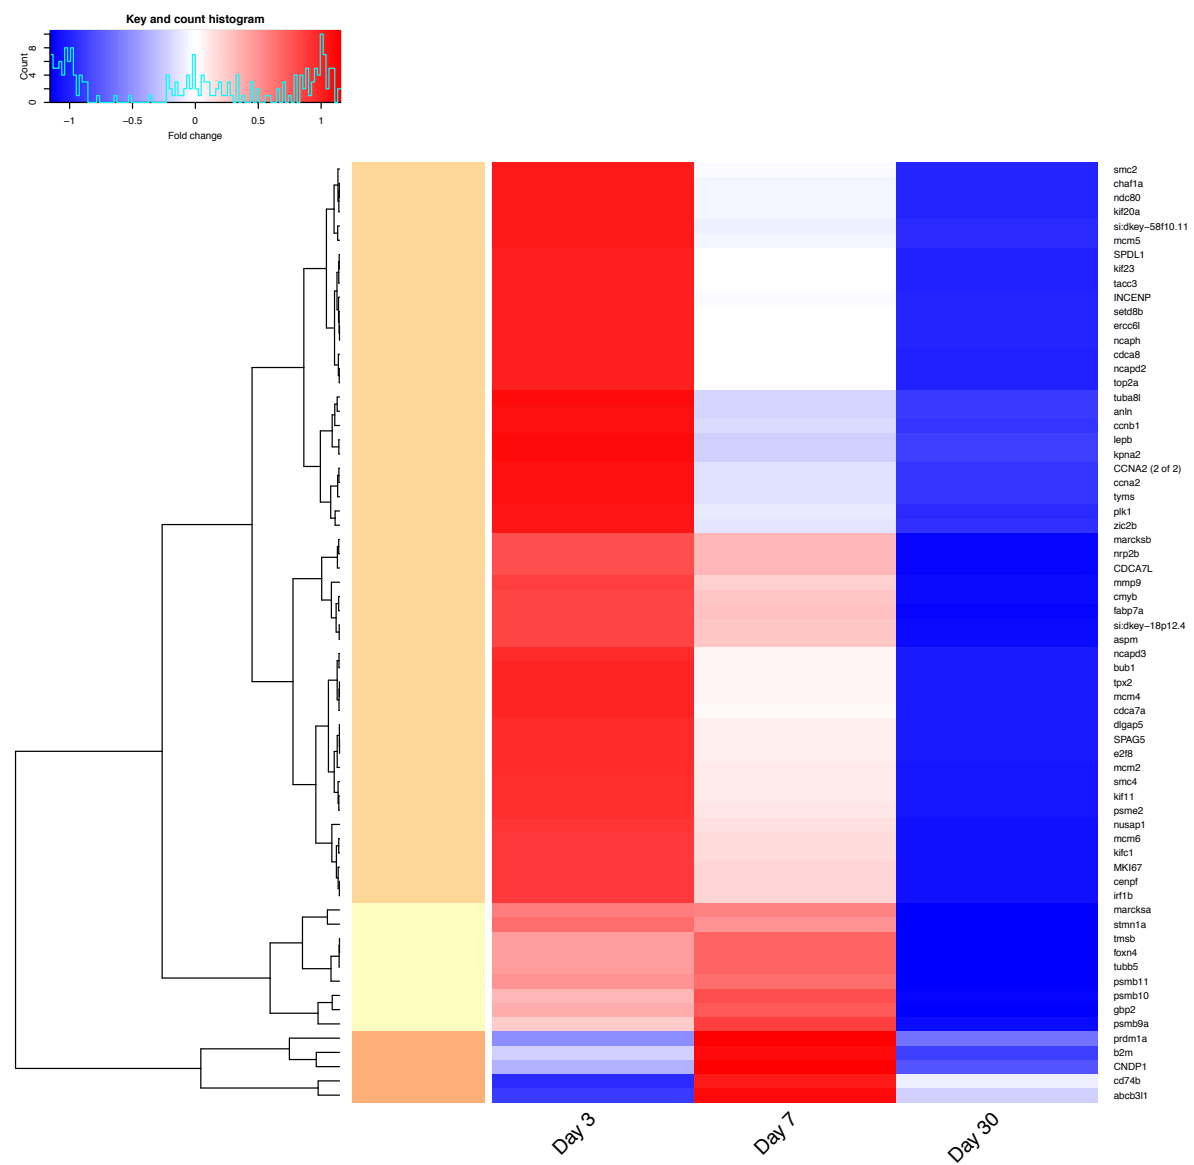

Supplement: s1 [file s1]
